# Supplementary material for: Integrating Microbiome Analysis, Metabolomics, Bioinformatics, and Histopathology to Elucidate the Protective Effects of Pomegranate Juice against Benzo-alpha-pyrene-Induced Colon Pathologies
Source: Int J Mol Sci. 2023 Jun 27;24(13):10691. doi: 10.3390/ijms241310691 (PMC10341650; doi:10.3390/ijms241310691)
Supplement: Supplementary file 1 [file ijms-24-10691-s001.zip]

Archive with 4 entries (4 files):
- HA_PomBaP_Supplementary_Data_S1.xlsx
- HA_PomBaP_Supplementary_Data_S2.xlsx
- HA_PomBaP_Supplementary_Data_S3.xlsx
- HA_PomBaP_Supplementary_material_Proofs.pdf
