# Supplementary material for: Integrating Microbiome Analysis, Metabolomics, Bioinformatics, and Histopathology to Elucidate the Protective Effects of Pomegranate Juice against Benzo-alpha-pyrene-Induced Colon Pathologies
Source: Int J Mol Sci. 2023 Jun 27;24(13):10691. doi: 10.3390/ijms241310691 (PMC10341650; doi:10.3390/ijms241310691)
Supplement: Supplementary file 1 [file ijms-24-10691-s001.zip › HA_PomBaP_Supplementary_Data_S1.xlsx]

## Sheet: Summary_Taxa_Reads_and_Percent
## These data were used to estimate abundance (reads, left table) and relative abundance (%, right table) of all taxa at all taxonomic level (Processed MOTHUR output)
				## Assigned reads																											## RELATIVE ABUNDANCE (normalized read count to total reads, expressed as %)
					Control group												Untreated			Pom			BaP			PomBap					Control group												Untreated			Pom			BaP
taxlevel	rankID	taxon	daughterlevels	total	Wk0_C01_U	Wk0_C02_U	Wk0_C03_U	Wk0_C04_P	Wk0_C05_P	Wk0_C06_P	Wk0_C07_B	Wk0_C08_B	Wk0_C09_B	Wk0_C10_PB	Wk0_C11_PB	Wk0_C12_PB	Wk04_C01_U	Wk04_C02_U	Wk04_C03_U	Wk04_C04_P	Wk04_C05_P	Wk04_C06_P	Wk04_C07_B	Wk04_C08_B	Wk04_C09_B	Wk04_C10_PB	Wk04_C11_PB	Wk04_C12_PB		taxon	Wk0_C01_U	Wk0_C02_U	Wk0_C03_U	Wk0_C04_P	Wk0_C05_P	Wk0_C06_P	Wk0_C07_B	Wk0_C08_B	Wk0_C09_B	Wk0_C10_PB	Wk0_C11_PB	Wk0_C12_PB	Wk04_C01_U	Wk04_C02_U	Wk04_C03_U	Wk04_C04_P	Wk04_C05_P	Wk04_C06_P	Wk04_C07_B
0	0	Root	2	171078	6788	12323	5137	9603	5194	7835	7689	5313	6153	5476	3322	6975	6151	6539	5702	6866	11721	9147	8344	7785	6107	7695	8524	4689		Root	100	100	100	100	100	100	100	100	100	100	100	100	100	100	100	100	100	100	100
1	0.1	Archaea	1	5	0	0	0	0	0	0	0	0	0	0	0	0	1	0	1	0	0	0	0	1	1	0	1	0		Archaea	0	0	0	0	0	0	0	0	0	0	0	0	0.0162575	0	0.0175377	0	0	0	0
2	0.1.6	Euryarchaeota	2	5	0	0	0	0	0	0	0	0	0	0	0	0	1	0	1	0	0	0	0	1	1	0	1	0		Euryarchaeota	0	0	0	0	0	0	0	0	0	0	0	0	0.0162575	0	0.0175377	0	0	0	0
3	0.1.6.3	Methanobacteria	1	4	0	0	0	0	0	0	0	0	0	0	0	0	0	0	1	0	0	0	0	1	1	0	1	0		Methanobacteria	0	0	0	0	0	0	0	0	0	0	0	0	0	0	0.0175377	0	0	0	0
4	0.1.6.3.1	Methanobacteriales	1	4	0	0	0	0	0	0	0	0	0	0	0	0	0	0	1	0	0	0	0	1	1	0	1	0		Methanobacteriales	0	0	0	0	0	0	0	0	0	0	0	0	0	0	0.0175377	0	0	0	0
5	0.1.6.3.1.1	Methanobacteriaceae	1	4	0	0	0	0	0	0	0	0	0	0	0	0	0	0	1	0	0	0	0	1	1	0	1	0		Methanobacteriaceae	0	0	0	0	0	0	0	0	0	0	0	0	0	0	0.0175377	0	0	0	0
6	0.1.6.3.1.1.2	Methanobrevibacter	0	4	0	0	0	0	0	0	0	0	0	0	0	0	0	0	1	0	0	0	0	1	1	0	1	0		Methanobrevibacter	0	0	0	0	0	0	0	0	0	0	0	0	0	0	0.0175377	0	0	0	0
3	0.1.6.8	Thermoplasmata	1	1	0	0	0	0	0	0	0	0	0	0	0	0	1	0	0	0	0	0	0	0	0	0	0	0		Thermoplasmata	0	0	0	0	0	0	0	0	0	0	0	0	0.0162575	0	0	0	0	0	0
4	0.1.6.8.8	Thermoplasmatales	1	1	0	0	0	0	0	0	0	0	0	0	0	0	1	0	0	0	0	0	0	0	0	0	0	0		Thermoplasmatales	0	0	0	0	0	0	0	0	0	0	0	0	0.0162575	0	0	0	0	0	0
5	0.1.6.8.8.19	Thermoplasmatales_Incertae_Sedis	1	1	0	0	0	0	0	0	0	0	0	0	0	0	1	0	0	0	0	0	0	0	0	0	0	0		Thermoplasmatales_Incertae_Sedis	0	0	0	0	0	0	0	0	0	0	0	0	0.0162575	0	0	0	0	0	0
6	0.1.6.8.8.19.1	Candidatus_Methanogranum	0	1	0	0	0	0	0	0	0	0	0	0	0	0	1	0	0	0	0	0	0	0	0	0	0	0		Candidatus_Methanogranum	0	0	0	0	0	0	0	0	0	0	0	0	0.0162575	0	0	0	0	0	0
1	0.2	Bacteria	16	171073	6788	12323	5137	9603	5194	7835	7689	5313	6153	5476	3322	6975	6150	6539	5701	6866	11721	9147	8344	7784	6106	7695	8523	4689		Bacteria	100	100	100	100	100	100	100	100	100	100	100	100	99.9837	100	99.9825	100	100	100	100
2	0.2.3	Actinobacteria	3	2292	163	269	88	57	48	146	145	118	95	21	10	73	22	62	62	160	35	156	74	173	86	103	90	36		Actinobacteria	2.4013	2.18291	1.71306	0.593565	0.924143	1.86343	1.88581	2.22097	1.54396	0.383492	0.301023	1.04659	0.357665	0.948157	1.08734	2.33032	0.298609	1.70548	0.886865
3	0.2.3.2	Actinobacteria_class	3	26	1	8	0	0	1	6	1	2	2	0	0	1	0	0	0	0	1	0	0	1	0	1	1	0		Actinobacteria_class	0.0147319	0.0649193	0	0	0.019253	0.0765795	0.0130056	0.0376435	0.0325045	0	0	0.0143369	0	0	0	0	0.0085317	0	0
4	0.2.3.2.3	Bifidobacteriales	1	24	1	7	0	0	1	6	1	2	2	0	0	1	0	0	0	0	0	0	0	1	0	1	1	0		Bifidobacteriales	0.0147319	0.0568043	0	0	0.019253	0.0765795	0.0130056	0.0376435	0.0325045	0	0	0.0143369	0	0	0	0	0	0	0
5	0.2.3.2.3.1	Bifidobacteriaceae	2	24	1	7	0	0	1	6	1	2	2	0	0	1	0	0	0	0	0	0	0	1	0	1	1	0		Bifidobacteriaceae	0.0147319	0.0568043	0	0	0.019253	0.0765795	0.0130056	0.0376435	0.0325045	0	0	0.0143369	0	0	0	0	0	0	0
6	0.2.3.2.3.1.3	Bifidobacterium	0	10	0	3	0	0	1	2	1	0	1	0	0	0	0	0	0	0	0	0	0	0	0	1	1	0		Bifidobacterium	0	0.0243447	0	0	0.019253	0.0255265	0.0130056	0	0.0162522	0	0	0	0	0	0	0	0	0	0
6	0.2.3.2.3.1.10	Bifidobacteriaceae_g_unclassified	0	14	1	4	0	0	0	4	0	2	1	0	0	1	0	0	0	0	0	0	0	1	0	0	0	0		Bifidobacteriaceae_g_unclassified	0.0147319	0.0324596	0	0	0	0.051053	0	0.0376435	0.0162522	0	0	0.0143369	0	0	0	0	0	0	0
4	0.2.3.2.10	Micrococcales	1	1	0	0	0	0	0	0	0	0	0	0	0	0	0	0	0	0	1	0	0	0	0	0	0	0		Micrococcales	0	0	0	0	0	0	0	0	0	0	0	0	0	0	0	0	0.0085317	0	0
5	0.2.3.2.10.12	Micrococcaceae	1	1	0	0	0	0	0	0	0	0	0	0	0	0	0	0	0	0	1	0	0	0	0	0	0	0		Micrococcaceae	0	0	0	0	0	0	0	0	0	0	0	0	0	0	0	0	0.0085317	0	0
6	0.2.3.2.10.12.9	Rothia	0	1	0	0	0	0	0	0	0	0	0	0	0	0	0	0	0	0	1	0	0	0	0	0	0	0		Rothia	0	0	0	0	0	0	0	0	0	0	0	0	0	0	0	0	0.0085317	0	0
4	0.2.3.2.18	Actinobacteria_o_unclassified	1	1	0	1	0	0	0	0	0	0	0	0	0	0	0	0	0	0	0	0	0	0	0	0	0	0		Actinobacteria_o_unclassified	0	0.00811491	0	0	0	0	0	0	0	0	0	0	0	0	0	0	0	0	0
5	0.2.3.2.18.1	Actinobacteria_f_unclassified	1	1	0	1	0	0	0	0	0	0	0	0	0	0	0	0	0	0	0	0	0	0	0	0	0	0		Actinobacteria_f_unclassified	0	0.00811491	0	0	0	0	0	0	0	0	0	0	0	0	0	0	0	0	0
6	0.2.3.2.18.1.1	Actinobacteria_g_unclassified	0	1	0	1	0	0	0	0	0	0	0	0	0	0	0	0	0	0	0	0	0	0	0	0	0	0		Actinobacteria_g_unclassified	0	0.00811491	0	0	0	0	0	0	0	0	0	0	0	0	0	0	0	0	0
3	0.2.3.3	Coriobacteriia	1	2103	153	250	86	53	42	129	134	99	81	19	9	69	19	60	56	151	30	145	67	162	85	89	84	31		Coriobacteriia	2.25398	2.02873	1.67413	0.551911	0.808625	1.64646	1.74275	1.86335	1.31643	0.346969	0.270921	0.989247	0.308893	0.917571	0.982112	2.19924	0.255951	1.58522	0.802972
4	0.2.3.3.1	Coriobacteriales	1	2103	153	250	86	53	42	129	134	99	81	19	9	69	19	60	56	151	30	145	67	162	85	89	84	31		Coriobacteriales	2.25398	2.02873	1.67413	0.551911	0.808625	1.64646	1.74275	1.86335	1.31643	0.346969	0.270921	0.989247	0.308893	0.917571	0.982112	2.19924	0.255951	1.58522	0.802972
5	0.2.3.3.1.1	Coriobacteriaceae	8	2103	153	250	86	53	42	129	134	99	81	19	9	69	19	60	56	151	30	145	67	162	85	89	84	31		Coriobacteriaceae	2.25398	2.02873	1.67413	0.551911	0.808625	1.64646	1.74275	1.86335	1.31643	0.346969	0.270921	0.989247	0.308893	0.917571	0.982112	2.19924	0.255951	1.58522	0.802972
6	0.2.3.3.1.1.1	Adlercreutzia	0	76	5	11	6	1	0	4	6	1	2	1	0	0	0	2	1	6	2	12	1	1	3	6	4	1		Adlercreutzia	0.0736594	0.089264	0.1168	0.0104134	0	0.051053	0.0780336	0.0188218	0.0325045	0.0182615	0	0	0	0.0305857	0.0175377	0.0873871	0.0170634	0.131191	0.0119847
6	0.2.3.3.1.1.3	Collinsella	0	194	5	19	8	5	2	7	2	15	2	3	0	8	0	17	18	4	4	9	4	5	45	8	4	0		Collinsella	0.0736594	0.154183	0.155733	0.0520671	0.038506	0.0893427	0.0260112	0.282326	0.0325045	0.0547845	0	0.114695	0	0.259979	0.315679	0.0582581	0.0341268	0.0983929	0.0479386
6	0.2.3.3.1.1.4	Coriobacteriaceae_UCG-002	0	36	0	6	0	0	0	4	0	12	0	0	1	0	0	0	0	0	3	0	0	0	0	0	10	0		Coriobacteriaceae_UCG-002	0	0.0486894	0	0	0	0.051053	0	0.225861	0	0	0.0301023	0	0	0	0	0	0.0255951	0	0
6	0.2.3.3.1.1.5	Coriobacteriaceae_UCG-003	0	4	0	0	0	0	0	0	0	0	4	0	0	0	0	0	0	0	0	0	0	0	0	0	0	0		Coriobacteriaceae_UCG-003	0	0	0	0	0	0	0	0	0.0650089	0	0	0	0	0	0	0	0	0	0
6	0.2.3.3.1.1.9	Enterorhabdus	0	247	6	31	18	8	8	12	19	9	11	5	1	15	1	9	2	36	2	0	3	17	4	11	4	15		Enterorhabdus	0.0883913	0.251562	0.350399	0.0833073	0.154024	0.153159	0.247106	0.169396	0.178775	0.0913075	0.0301023	0.215054	0.0162575	0.137636	0.0350754	0.524323	0.0170634	0	0.035954
6	0.2.3.3.1.1.12	Parvibacter	0	33	1	4	2	0	0	3	2	0	0	1	1	0	0	2	3	3	0	4	0	4	0	2	1	0		Parvibacter	0.0147319	0.0324596	0.0389332	0	0	0.0382897	0.0260112	0	0	0.0182615	0.0301023	0	0	0.0305857	0.0526131	0.0436936	0	0.0437302	0
6	0.2.3.3.1.1.13	Senegalimassilia	0	92	1	4	0	3	3	4	0	2	10	0	0	1	4	4	9	15	0	9	6	8	2	3	1	3		Senegalimassilia	0.0147319	0.0324596	0	0.0312402	0.057759	0.051053	0	0.0376435	0.162522	0	0	0.0143369	0.0650301	0.0611714	0.157839	0.218468	0	0.0983929	0.071908
6	0.2.3.3.1.1.15	Coriobacteriaceae_g_unclassified	0	1421	135	175	52	36	29	95	105	60	52	9	6	45	14	26	23	87	19	111	53	127	31	59	60	12		Coriobacteriaceae_g_unclassified	1.9888	1.42011	1.01226	0.374883	0.558337	1.21251	1.36559	1.12931	0.845116	0.164354	0.180614	0.645161	0.227605	0.397614	0.403367	1.26711	0.162102	1.21351	0.635187
3	0.2.3.12	Actinobacteria_class12	1	163	9	11	2	4	5	11	10	17	12	2	1	3	3	2	6	9	4	11	7	10	1	13	5	5		Actinobacteria_class12	0.132587	0.089264	0.0389332	0.0416536	0.0962649	0.140396	0.130056	0.31997	0.195027	0.036523	0.0301023	0.0430108	0.0487726	0.0305857	0.105226	0.131081	0.0341268	0.120258	0.0838926
4	0.2.3.12.1	Actinobacteria_class12_o_unclassified	1	163	9	11	2	4	5	11	10	17	12	2	1	3	3	2	6	9	4	11	7	10	1	13	5	5		Actinobacteria_class12_o_unclassified	0.132587	0.089264	0.0389332	0.0416536	0.0962649	0.140396	0.130056	0.31997	0.195027	0.036523	0.0301023	0.0430108	0.0487726	0.0305857	0.105226	0.131081	0.0341268	0.120258	0.0838926
5	0.2.3.12.1.1	Actinobacteria_class12_f_unclassified	1	163	9	11	2	4	5	11	10	17	12	2	1	3	3	2	6	9	4	11	7	10	1	13	5	5		Actinobacteria_class12_f_unclassified	0.132587	0.089264	0.0389332	0.0416536	0.0962649	0.140396	0.130056	0.31997	0.195027	0.036523	0.0301023	0.0430108	0.0487726	0.0305857	0.105226	0.131081	0.0341268	0.120258	0.0838926
6	0.2.3.12.1.1.1	Actinobacteria_class12_o_f_g_unclassified	0	163	9	11	2	4	5	11	10	17	12	2	1	3	3	2	6	9	4	11	7	10	1	13	5	5		Actinobacteria_class12_o_f_g_unclassified	0.132587	0.089264	0.0389332	0.0416536	0.0962649	0.140396	0.130056	0.31997	0.195027	0.036523	0.0301023	0.0430108	0.0487726	0.0305857	0.105226	0.131081	0.0341268	0.120258	0.0838926
2	0.2.9	Bacteroidetes	2	93938	3880	7861	3358	6309	3026	4317	5359	3494	3323	3523	2035	4717	3078	2445	2115	3243	8111	4324	3576	3864	2652	3947	2676	2705		Bacteroidetes	57.1597	63.7913	65.3689	65.6982	58.2595	55.0989	69.697	65.7632	54.0062	64.3353	61.2583	67.6272	50.0406	37.391	37.0922	47.2327	69.2006	47.2723	42.8571
3	0.2.9.5	Bacteroidia	2	75715	3245	6551	2840	4820	2525	3612	4520	2878	2805	3094	1713	3966	2314	1984	1724	2490	6217	3325	2743	2942	2036	3118	1997	2256		Bacteroidia	47.8049	53.1608	55.2852	50.1926	48.6138	46.1008	58.7853	54.169	45.5875	56.5011	51.5653	56.8602	37.6199	30.341	30.235	36.2657	53.0415	36.3507	32.8739
4	0.2.9.5.1	Bacteroidales	8	74959	3215	6510	2820	4765	2504	3589	4486	2856	2783	3081	1701	3939	2283	1956	1706	2465	6143	3253	2705	2913	2011	3088	1953	2234		Bacteroidales	47.363	52.828	54.8959	49.6199	48.2095	45.8073	58.3431	53.7549	45.23	56.2637	51.2041	56.4731	37.1159	29.9128	29.9193	35.9015	52.4102	35.5636	32.4185
5	0.2.9.5.1.2	Bacteroidaceae	1	199	3	6	15	7	5	2	5	3	6	4	3	12	5	4	7	9	38	7	7	12	7	16	1	15		Bacteroidaceae	0.0441956	0.0486894	0.291999	0.0728939	0.0962649	0.0255265	0.065028	0.0564653	0.0975134	0.073046	0.090307	0.172043	0.0812876	0.0611714	0.122764	0.131081	0.324204	0.0765278	0.0838926
6	0.2.9.5.1.2.1	Bacteroides	0	199	3	6	15	7	5	2	5	3	6	4	3	12	5	4	7	9	38	7	7	12	7	16	1	15		Bacteroides	0.0441956	0.0486894	0.291999	0.0728939	0.0962649	0.0255265	0.065028	0.0564653	0.0975134	0.073046	0.090307	0.172043	0.0812876	0.0611714	0.122764	0.131081	0.324204	0.0765278	0.0838926
5	0.2.9.5.1.5	Bacteroidales_RF16_group	1	8	1	0	0	0	1	1	0	0	0	0	1	1	1	0	0	0	0	0	1	1	0	0	0	0		Bacteroidales_RF16_group	0.0147319	0	0	0	0.019253	0.0127632	0	0	0	0	0.0301023	0.0143369	0.0162575	0	0	0	0	0	0.0119847
6	0.2.9.5.1.5.1	Bacteroidales_RF16_group_g_unclassified	0	8	1	0	0	0	1	1	0	0	0	0	1	1	1	0	0	0	0	0	1	1	0	0	0	0		Bacteroidales_RF16_group_g_unclassified	0.0147319	0	0	0	0.019253	0.0127632	0	0	0	0	0.0301023	0.0143369	0.0162575	0	0	0	0	0	0.0119847
5	0.2.9.5.1.6	Bacteroidales_S24-7_group	1	43497	2111	4054	1840	3052	1433	2352	2707	1976	1514	1600	854	2583	1283	1134	1020	1308	2359	1680	1479	1695	1071	1889	1255	1248		Bacteroidales_S24-7_group	31.099	32.8978	35.8186	31.7817	27.5895	30.0191	35.2061	37.1918	24.6059	29.2184	25.7074	37.0323	20.8584	17.3421	17.8885	19.0504	20.1263	18.3667	17.7253
6	0.2.9.5.1.6.1	Bacteroidales_S24-7_group_g_unclassified	0	43497	2111	4054	1840	3052	1433	2352	2707	1976	1514	1600	854	2583	1283	1134	1020	1308	2359	1680	1479	1695	1071	1889	1255	1248		Bacteroidales_S24-7_group_g_unclassified	31.099	32.8978	35.8186	31.7817	27.5895	30.0191	35.2061	37.1918	24.6059	29.2184	25.7074	37.0323	20.8584	17.3421	17.8885	19.0504	20.1263	18.3667	17.7253
5	0.2.9.5.1.20	Porphyromonadaceae	4	213	4	7	4	7	3	9	7	3	6	16	6	24	12	5	6	10	20	11	2	21	4	6	2	18		Porphyromonadaceae	0.0589275	0.0568043	0.0778665	0.0728939	0.057759	0.114869	0.0910391	0.0564653	0.0975134	0.292184	0.180614	0.344086	0.19509	0.0764643	0.105226	0.145645	0.170634	0.120258	0.0239693
6	0.2.9.5.1.20.2	Butyricimonas	0	106	3	6	3	4	2	5	5	2	1	14	4	13	5	4	0	2	7	4	0	13	0	2	0	7		Butyricimonas	0.0441956	0.0486894	0.0583998	0.0416536	0.038506	0.0638162	0.065028	0.0376435	0.0162522	0.255661	0.120409	0.18638	0.0812876	0.0611714	0	0.029129	0.0597219	0.0437302	0
6	0.2.9.5.1.20.10	Odoribacter	0	16	1	0	0	1	0	2	0	0	1	0	0	3	1	0	0	1	0	1	0	4	0	0	0	1		Odoribacter	0.0147319	0	0	0.0104134	0	0.0255265	0	0	0.0162522	0	0	0.0430108	0.0162575	0	0	0.0145645	0	0.0109325	0
6	0.2.9.5.1.20.12	Parabacteroides	0	87	0	1	1	2	1	2	2	1	4	2	2	8	5	1	6	7	13	6	2	2	4	4	1	10		Parabacteroides	0	0.00811491	0.0194666	0.0208268	0.019253	0.0255265	0.0260112	0.0188218	0.0650089	0.036523	0.0602047	0.114695	0.0812876	0.0152929	0.105226	0.101952	0.110912	0.0655953	0.0239693
6	0.2.9.5.1.20.17	Porphyromonadaceae_g_unclassified	0	4	0	0	0	0	0	0	0	0	0	0	0	0	1	0	0	0	0	0	0	2	0	0	1	0		Porphyromonadaceae_g_unclassified	0	0	0	0	0	0	0	0	0	0	0	0	0.0162575	0	0	0	0	0	0
5	0.2.9.5.1.21	Prevotellaceae	9	13448	338	1013	363	485	499	440	793	222	672	896	509	552	447	305	241	446	2246	800	389	514	336	334	99	509		Prevotellaceae	4.97938	8.2204	7.06638	5.05051	9.60724	5.61583	10.3134	4.17843	10.9215	16.3623	15.3221	7.91398	7.26711	4.66432	4.22659	6.49578	19.1622	8.74604	4.66203
6	0.2.9.5.1.21.1	Alloprevotella	0	1867	29	72	49	71	65	55	115	46	253	56	139	102	102	19	17	20	350	122	12	21	44	56	10	42		Alloprevotella	0.427225	0.584273	0.953864	0.739352	1.25144	0.701978	1.49564	0.865801	4.11182	1.02264	4.18423	1.46237	1.65827	0.290564	0.298141	0.29129	2.98609	1.33377	0.143816
6	0.2.9.5.1.21.5	Prevotella_2	0	32	0	5	2	1	0	1	3	0	2	0	1	7	1	0	0	0	4	0	2	0	0	3	0	0		Prevotella_2	0	0.0405745	0.0389332	0.0104134	0	0.0127632	0.0390168	0	0.0325045	0	0.0301023	0.100358	0.0162575	0	0	0	0.0341268	0	0.0239693
6	0.2.9.5.1.21.8	Prevotella_9	0	1143	43	66	26	42	17	83	58	32	47	72	113	67	31	47	34	53	158	6	35	12	19	54	6	22		Prevotella_9	0.633471	0.535584	0.506132	0.437363	0.327301	1.05935	0.754324	0.602296	0.763855	1.31483	3.40157	0.960573	0.503983	0.718764	0.596282	0.77192	1.34801	0.0655953	0.419463
6	0.2.9.5.1.21.9	Prevotellaceae_Ga6A1_group	0	478	0	0	0	0	0	0	1	0	0	0	0	0	12	25	30	0	13	0	0	0	45	0	0	352		Prevotellaceae_Ga6A1_group	0	0	0	0	0	0	0.0130056	0	0	0	0	0	0.19509	0.382321	0.526131	0	0.110912	0	0
6	0.2.9.5.1.21.10	Prevotellaceae_NK3B31_group	0	353	5	9	9	4	13	9	8	10	11	5	14	5	8	18	8	42	84	10	8	38	6	25	3	1		Prevotellaceae_NK3B31_group	0.0736594	0.0730342	0.1752	0.0416536	0.250289	0.114869	0.104045	0.188218	0.178775	0.0913075	0.421433	0.0716846	0.13006	0.275271	0.140302	0.61171	0.716662	0.109325	0.0958773
6	0.2.9.5.1.21.11	Prevotellaceae_UCG-001	0	854	9	28	7	14	47	28	73	13	99	39	46	167	11	2	2	25	141	24	6	4	2	21	1	45		Prevotellaceae_UCG-001	0.132587	0.227217	0.136266	0.145788	0.90489	0.357371	0.949408	0.244683	1.60897	0.712199	1.38471	2.39427	0.178833	0.0305857	0.0350754	0.364113	1.20297	0.262381	0.071908
6	0.2.9.5.1.21.12	Prevotellaceae_UCG-003	0	6603	228	746	237	299	275	212	473	109	163	587	107	134	213	129	111	177	928	531	256	387	153	60	67	21		Prevotellaceae_UCG-003	3.35887	6.05372	4.61359	3.11361	5.29457	2.70581	6.15165	2.05157	2.64911	10.7195	3.22095	1.92115	3.46285	1.97278	1.94669	2.57792	7.91741	5.80518	3.06807
6	0.2.9.5.1.21.13	Prevotellaceae_UCG-004	0	1	0	0	0	0	0	0	1	0	0	0	0	0	0	0	0	0	0	0	0	0	0	0	0	0		Prevotellaceae_UCG-004	0	0	0	0	0	0	0.0130056	0	0	0	0	0	0	0	0	0	0	0	0
6	0.2.9.5.1.21.15	Prevotellaceae_g_unclassified	0	2117	24	87	33	54	82	52	61	12	97	137	89	70	69	65	39	129	568	107	70	52	67	115	12	26		Prevotellaceae_g_unclassified	0.353565	0.705997	0.642398	0.562324	1.57874	0.663689	0.793341	0.225861	1.57647	2.50183	2.67911	1.00358	1.12177	0.994036	0.683971	1.87882	4.846	1.16978	0.838926
5	0.2.9.5.1.22	Rikenellaceae	5	76	1	3	0	4	2	3	0	1	4	3	1	1	5	1	3	4	9	4	5	8	3	7	1	3		Rikenellaceae	0.0147319	0.0243447	0	0.0416536	0.038506	0.0382897	0	0.0188218	0.0650089	0.0547845	0.0301023	0.0143369	0.0812876	0.0152929	0.0526131	0.0582581	0.0767853	0.0437302	0.0599233
6	0.2.9.5.1.22.1	Alistipes	0	22	0	1	0	1	1	1	0	1	3	1	0	1	1	0	0	0	1	0	0	6	0	1	1	2		Alistipes	0	0.00811491	0	0.0104134	0.019253	0.0127632	0	0.0188218	0.0487567	0.0182615	0	0.0143369	0.0162575	0	0	0	0.0085317	0	0
6	0.2.9.5.1.22.6	Rikenella	0	1	0	0	0	0	0	0	0	0	0	0	0	0	0	0	0	0	0	1	0	0	0	0	0	0		Rikenella	0	0	0	0	0	0	0	0	0	0	0	0	0	0	0	0	0	0.0109325	0
6	0.2.9.5.1.22.7	Rikenellaceae_RC9_gut_group	0	12	0	0	0	2	0	0	0	0	0	1	0	0	1	0	1	0	2	0	1	2	1	1	0	0		Rikenellaceae_RC9_gut_group	0	0	0	0.0208268	0	0	0	0	0	0.0182615	0	0	0.0162575	0	0.0175377	0	0.0170634	0	0.0119847
6	0.2.9.5.1.22.11	dgA-11_gut_group	0	1	0	0	0	0	0	0	0	0	0	0	0	0	0	0	0	0	1	0	0	0	0	0	0	0		dgA-11_gut_group	0	0	0	0	0	0	0	0	0	0	0	0	0	0	0	0	0.0085317	0	0
6	0.2.9.5.1.22.13	Rikenellaceae_g_unclassified	0	40	1	2	0	1	1	2	0	0	1	1	1	0	3	1	2	4	5	3	4	0	2	5	0	1		Rikenellaceae_g_unclassified	0.0147319	0.0162298	0	0.0104134	0.019253	0.0255265	0	0	0.0162522	0.0182615	0.0301023	0	0.0487726	0.0152929	0.0350754	0.0582581	0.0426585	0.0327976	0.0479386
5	0.2.9.5.1.24	p-2534-18B5_gut_group	1	19	0	0	0	0	0	8	1	0	0	0	0	0	0	0	0	0	1	3	0	0	5	0	1	0		p-2534-18B5_gut_group	0	0	0	0	0	0.102106	0.0130056	0	0	0	0	0	0	0	0	0	0.0085317	0.0327976	0
6	0.2.9.5.1.24.1	p-2534-18B5_gut_group_g_unclassified	0	19	0	0	0	0	0	8	1	0	0	0	0	0	0	0	0	0	1	3	0	0	5	0	1	0		p-2534-18B5_gut_group_g_unclassified	0	0	0	0	0	0.102106	0.0130056	0	0	0	0	0	0	0	0	0	0.0085317	0.0327976	0
5	0.2.9.5.1.26	Bacteroidales_f_unclassified	1	17499	757	1427	598	1210	561	774	973	651	581	562	327	766	530	507	429	688	1470	748	822	662	585	836	594	441		Bacteroidales_f_unclassified	11.152	11.58	11.641	12.6002	10.8009	9.87875	12.6544	12.253	9.44255	10.263	9.84347	10.9821	8.61649	7.75348	7.52368	10.0204	12.5416	8.17754	9.85139
6	0.2.9.5.1.26.1	Bacteroidales_f_g_unclassified	0	17499	757	1427	598	1210	561	774	973	651	581	562	327	766	530	507	429	688	1470	748	822	662	585	836	594	441		Bacteroidales_f_g_unclassified	11.152	11.58	11.641	12.6002	10.8009	9.87875	12.6544	12.253	9.44255	10.263	9.84347	10.9821	8.61649	7.75348	7.52368	10.0204	12.5416	8.17754	9.85139
4	0.2.9.5.3	Bacteroidia_o_unclassified	1	756	30	41	20	55	21	23	34	22	22	13	12	27	31	28	18	25	74	72	38	29	25	30	44	22		Bacteroidia_o_unclassified	0.441956	0.332711	0.389332	0.572738	0.404313	0.293555	0.44219	0.414079	0.357549	0.2374	0.361228	0.387097	0.503983	0.4282	0.315679	0.364113	0.631345	0.787143	0.455417
5	0.2.9.5.3.1	Bacteroidia_o_f_unclassified	1	756	30	41	20	55	21	23	34	22	22	13	12	27	31	28	18	25	74	72	38	29	25	30	44	22		Bacteroidia_o_f_unclassified	0.441956	0.332711	0.389332	0.572738	0.404313	0.293555	0.44219	0.414079	0.357549	0.2374	0.361228	0.387097	0.503983	0.4282	0.315679	0.364113	0.631345	0.787143	0.455417
6	0.2.9.5.3.1.1	Bacteroidia_o_f_g_unclassified	0	756	30	41	20	55	21	23	34	22	22	13	12	27	31	28	18	25	74	72	38	29	25	30	44	22		Bacteroidia_o_f_g_unclassified	0.441956	0.332711	0.389332	0.572738	0.404313	0.293555	0.44219	0.414079	0.357549	0.2374	0.361228	0.387097	0.503983	0.4282	0.315679	0.364113	0.631345	0.787143	0.455417
3	0.2.9.14	Bacteroidetes_c_unclassified	1	18223	635	1310	518	1489	501	705	839	616	518	429	322	751	764	461	391	753	1894	999	833	922	616	829	679	449		Bacteroidetes_c_unclassified	9.35474	10.6305	10.0837	15.5056	9.64575	8.99809	10.9117	11.5942	8.41866	7.83419	9.69296	10.767	12.4207	7.05001	6.85724	10.9671	16.159	10.9216	9.98322
4	0.2.9.14.1	Bacteroidetes_c_o_unclassified	1	18223	635	1310	518	1489	501	705	839	616	518	429	322	751	764	461	391	753	1894	999	833	922	616	829	679	449		Bacteroidetes_c_o_unclassified	9.35474	10.6305	10.0837	15.5056	9.64575	8.99809	10.9117	11.5942	8.41866	7.83419	9.69296	10.767	12.4207	7.05001	6.85724	10.9671	16.159	10.9216	9.98322
5	0.2.9.14.1.1	Bacteroidetes_c_o_f_unclassified	1	18223	635	1310	518	1489	501	705	839	616	518	429	322	751	764	461	391	753	1894	999	833	922	616	829	679	449		Bacteroidetes_c_o_f_unclassified	9.35474	10.6305	10.0837	15.5056	9.64575	8.99809	10.9117	11.5942	8.41866	7.83419	9.69296	10.767	12.4207	7.05001	6.85724	10.9671	16.159	10.9216	9.98322
6	0.2.9.14.1.1.1	Bacteroidetes_c_o_f_g_unclassified	0	18223	635	1310	518	1489	501	705	839	616	518	429	322	751	764	461	391	753	1894	999	833	922	616	829	679	449		Bacteroidetes_c_o_f_g_unclassified	9.35474	10.6305	10.0837	15.5056	9.64575	8.99809	10.9117	11.5942	8.41866	7.83419	9.69296	10.767	12.4207	7.05001	6.85724	10.9671	16.159	10.9216	9.98322
2	0.2.21	Cyanobacteria	2	75	1	2	1	7	9	1	3	2	3	1	0	6	1	7	5	0	5	11	4	2	1	0	0	3		Cyanobacteria	0.0147319	0.0162298	0.0194666	0.0728939	0.173277	0.0127632	0.0390168	0.0376435	0.0487567	0.0182615	0	0.0860215	0.0162575	0.10705	0.0876885	0	0.0426585	0.120258	0.0479386
3	0.2.21.4	Melainabacteria	1	71	1	2	0	6	9	1	3	2	3	1	0	6	1	6	5	0	5	10	4	2	1	0	0	3		Melainabacteria	0.0147319	0.0162298	0	0.0624805	0.173277	0.0127632	0.0390168	0.0376435	0.0487567	0.0182615	0	0.0860215	0.0162575	0.0917571	0.0876885	0	0.0426585	0.109325	0.0479386
4	0.2.21.4.2	Gastranaerophilales	1	71	1	2	0	6	9	1	3	2	3	1	0	6	1	6	5	0	5	10	4	2	1	0	0	3		Gastranaerophilales	0.0147319	0.0162298	0	0.0624805	0.173277	0.0127632	0.0390168	0.0376435	0.0487567	0.0182615	0	0.0860215	0.0162575	0.0917571	0.0876885	0	0.0426585	0.109325	0.0479386
5	0.2.21.4.2.1	Gastranaerophilales_f_unclassified	1	71	1	2	0	6	9	1	3	2	3	1	0	6	1	6	5	0	5	10	4	2	1	0	0	3		Gastranaerophilales_f_unclassified	0.0147319	0.0162298	0	0.0624805	0.173277	0.0127632	0.0390168	0.0376435	0.0487567	0.0182615	0	0.0860215	0.0162575	0.0917571	0.0876885	0	0.0426585	0.109325	0.0479386
6	0.2.21.4.2.1.1	Gastranaerophilales_f_g_unclassified	0	71	1	2	0	6	9	1	3	2	3	1	0	6	1	6	5	0	5	10	4	2	1	0	0	3		Gastranaerophilales_f_g_unclassified	0.0147319	0.0162298	0	0.0624805	0.173277	0.0127632	0.0390168	0.0376435	0.0487567	0.0182615	0	0.0860215	0.0162575	0.0917571	0.0876885	0	0.0426585	0.109325	0.0479386
3	0.2.21.5	Cyanobacteria_c_unclassified	1	4	0	0	1	1	0	0	0	0	0	0	0	0	0	1	0	0	0	1	0	0	0	0	0	0		Cyanobacteria_c_unclassified	0	0	0.0194666	0.0104134	0	0	0	0	0	0	0	0	0	0.0152929	0	0	0	0.0109325	0
4	0.2.21.5.1	Cyanobacteria_c_o_unclassified	1	4	0	0	1	1	0	0	0	0	0	0	0	0	0	1	0	0	0	1	0	0	0	0	0	0		Cyanobacteria_c_o_unclassified	0	0	0.0194666	0.0104134	0	0	0	0	0	0	0	0	0	0.0152929	0	0	0	0.0109325	0
5	0.2.21.5.1.1	Cyanobacteria_c_o_f_unclassified	1	4	0	0	1	1	0	0	0	0	0	0	0	0	0	1	0	0	0	1	0	0	0	0	0	0		Cyanobacteria_c_o_f_unclassified	0	0	0.0194666	0.0104134	0	0	0	0	0	0	0	0	0	0.0152929	0	0	0	0.0109325	0
6	0.2.21.5.1.1.1	Cyanobacteria_c_o_f_g_unclassified	0	4	0	0	1	1	0	0	0	0	0	0	0	0	0	1	0	0	0	1	0	0	0	0	0	0		Cyanobacteria_c_o_f_g_unclassified	0	0	0.0194666	0.0104134	0	0	0	0	0	0	0	0	0	0.0152929	0	0	0	0.0109325	0
2	0.2.22	Deferribacteres	1	7	0	0	0	0	0	2	0	0	0	1	0	0	1	0	0	0	0	0	0	2	1	0	0	0		Deferribacteres	0	0	0	0	0	0.0255265	0	0	0	0.0182615	0	0	0.0162575	0	0	0	0	0	0
3	0.2.22.1	Deferribacteres_class	1	7	0	0	0	0	0	2	0	0	0	1	0	0	1	0	0	0	0	0	0	2	1	0	0	0		Deferribacteres_class	0	0	0	0	0	0.0255265	0	0	0	0.0182615	0	0	0.0162575	0	0	0	0	0	0
4	0.2.22.1.1	Deferribacterales	1	7	0	0	0	0	0	2	0	0	0	1	0	0	1	0	0	0	0	0	0	2	1	0	0	0		Deferribacterales	0	0	0	0	0	0.0255265	0	0	0	0.0182615	0	0	0.0162575	0	0	0	0	0	0
5	0.2.22.1.1.1	Deferribacteraceae	1	7	0	0	0	0	0	2	0	0	0	1	0	0	1	0	0	0	0	0	0	2	1	0	0	0		Deferribacteraceae	0	0	0	0	0	0.0255265	0	0	0	0.0182615	0	0	0.0162575	0	0	0	0	0	0
6	0.2.22.1.1.1.6	Mucispirillum	0	7	0	0	0	0	0	2	0	0	0	1	0	0	1	0	0	0	0	0	0	2	1	0	0	0		Mucispirillum	0	0	0	0	0	0.0255265	0	0	0	0.0182615	0	0	0.0162575	0	0	0	0	0	0
2	0.2.25	Elusimicrobia	1	2	0	0	0	0	0	0	0	0	0	0	0	0	0	0	0	0	0	1	0	0	1	0	0	0		Elusimicrobia	0	0	0	0	0	0	0	0	0	0	0	0	0	0	0	0	0	0.0109325	0
3	0.2.25.1	Elusimicrobia_class	1	2	0	0	0	0	0	0	0	0	0	0	0	0	0	0	0	0	0	1	0	0	1	0	0	0		Elusimicrobia_class	0	0	0	0	0	0	0	0	0	0	0	0	0	0	0	0	0	0.0109325	0
4	0.2.25.1.2	Elusimicrobiales	1	2	0	0	0	0	0	0	0	0	0	0	0	0	0	0	0	0	0	1	0	0	1	0	0	0		Elusimicrobiales	0	0	0	0	0	0	0	0	0	0	0	0	0	0	0	0	0	0.0109325	0
5	0.2.25.1.2.1	Elusimicrobiaceae	1	2	0	0	0	0	0	0	0	0	0	0	0	0	0	0	0	0	0	1	0	0	1	0	0	0		Elusimicrobiaceae	0	0	0	0	0	0	0	0	0	0	0	0	0	0	0	0	0	0.0109325	0
6	0.2.25.1.2.1.1	Elusimicrobium	0	2	0	0	0	0	0	0	0	0	0	0	0	0	0	0	0	0	0	1	0	0	1	0	0	0		Elusimicrobium	0	0	0	0	0	0	0	0	0	0	0	0	0	0	0	0	0	0.0109325	0
2	0.2.26	Fibrobacteres	1	4	0	0	0	0	0	0	2	0	0	0	0	0	2	0	0	0	0	0	0	0	0	0	0	0		Fibrobacteres	0	0	0	0	0	0	0.0260112	0	0	0	0	0	0.032515	0	0	0	0	0	0
3	0.2.26.1	Fibrobacteria	1	4	0	0	0	0	0	0	2	0	0	0	0	0	2	0	0	0	0	0	0	0	0	0	0	0		Fibrobacteria	0	0	0	0	0	0	0.0260112	0	0	0	0	0	0.032515	0	0	0	0	0	0
4	0.2.26.1.1	Fibrobacterales	2	4	0	0	0	0	0	0	2	0	0	0	0	0	2	0	0	0	0	0	0	0	0	0	0	0		Fibrobacterales	0	0	0	0	0	0	0.0260112	0	0	0	0	0	0.032515	0	0	0	0	0	0
5	0.2.26.1.1.5	Fibrobacteraceae	1	3	0	0	0	0	0	0	2	0	0	0	0	0	1	0	0	0	0	0	0	0	0	0	0	0		Fibrobacteraceae	0	0	0	0	0	0	0.0260112	0	0	0	0	0	0.0162575	0	0	0	0	0	0
6	0.2.26.1.1.5.1	Fibrobacter	0	3	0	0	0	0	0	0	2	0	0	0	0	0	1	0	0	0	0	0	0	0	0	0	0	0		Fibrobacter	0	0	0	0	0	0	0.0260112	0	0	0	0	0	0.0162575	0	0	0	0	0	0
5	0.2.26.1.1.13	Fibrobacterales_f_unclassified	1	1	0	0	0	0	0	0	0	0	0	0	0	0	1	0	0	0	0	0	0	0	0	0	0	0		Fibrobacterales_f_unclassified	0	0	0	0	0	0	0	0	0	0	0	0	0.0162575	0	0	0	0	0	0
6	0.2.26.1.1.13.1	Fibrobacterales_f_g_unclassified	0	1	0	0	0	0	0	0	0	0	0	0	0	0	1	0	0	0	0	0	0	0	0	0	0	0		Fibrobacterales_f_g_unclassified	0	0	0	0	0	0	0	0	0	0	0	0	0.0162575	0	0	0	0	0	0
2	0.2.27	Firmicutes	5	37661	1709	2663	1104	1431	1141	2212	1197	911	1636	1236	635	1376	1528	1783	1586	1478	1516	1302	1816	1361	1910	2440	2595	1095		Firmicutes	25.1768	21.61	21.4911	14.9016	21.9677	28.2323	15.5677	17.1466	26.5887	22.5712	19.115	19.7276	24.8415	27.2672	27.8148	21.5264	12.934	14.2342	21.7641
3	0.2.27.1	Bacilli	2	6129	443	482	375	286	225	613	220	269	329	182	130	122	147	198	178	268	57	97	226	174	179	497	317	115		Bacilli	6.52622	3.91139	7.29998	2.97824	4.33192	7.82387	2.86123	5.06305	5.34699	3.32359	3.91331	1.7491	2.38986	3.02799	3.12171	3.90329	0.486307	1.06046	2.70853
4	0.2.27.1.4	Lactobacillales	5	5890	426	461	364	276	217	595	209	255	312	174	128	117	142	189	171	257	56	93	222	167	172	478	300	109		Lactobacillales	6.27578	3.74097	7.08585	2.8741	4.1779	7.59413	2.71817	4.79955	5.0707	3.1775	3.8531	1.67742	2.30857	2.89035	2.99895	3.74308	0.477775	1.01673	2.66059
5	0.2.27.1.4.1	Aerococcaceae	1	1	0	0	0	0	0	0	0	0	0	0	0	0	1	0	0	0	0	0	0	0	0	0	0	0		Aerococcaceae	0	0	0	0	0	0	0	0	0	0	0	0	0.0162575	0	0	0	0	0	0
6	0.2.27.1.4.1.9	Aerococcaceae_g_unclassified	0	1	0	0	0	0	0	0	0	0	0	0	0	0	1	0	0	0	0	0	0	0	0	0	0	0		Aerococcaceae_g_unclassified	0	0	0	0	0	0	0	0	0	0	0	0	0.0162575	0	0	0	0	0	0
5	0.2.27.1.4.2	Carnobacteriaceae	1	3	0	0	3	0	0	0	0	0	0	0	0	0	0	0	0	0	0	0	0	0	0	0	0	0		Carnobacteriaceae	0	0	0.0583998	0	0	0	0	0	0	0	0	0	0	0	0	0	0	0	0
6	0.2.27.1.4.2.17	Carnobacteriaceae_g_unclassified	0	3	0	0	3	0	0	0	0	0	0	0	0	0	0	0	0	0	0	0	0	0	0	0	0	0		Carnobacteriaceae_g_unclassified	0	0	0.0583998	0	0	0	0	0	0	0	0	0	0	0	0	0	0	0	0
5	0.2.27.1.4.4	Lactobacillaceae	2	2389	216	192	186	130	74	298	91	117	133	62	50	50	23	79	60	81	14	29	43	42	75	170	133	41		Lactobacillaceae	3.18209	1.55806	3.62079	1.35374	1.42472	3.80345	1.18351	2.20215	2.16155	1.13221	1.50512	0.716846	0.373923	1.20814	1.05226	1.17973	0.119444	0.317044	0.51534
6	0.2.27.1.4.4.1	Lactobacillus	0	2345	209	188	184	130	70	297	89	117	129	59	48	50	23	78	58	81	14	28	43	42	73	167	128	40		Lactobacillus	3.07896	1.5256	3.58186	1.35374	1.34771	3.79068	1.1575	2.20215	2.09654	1.07743	1.44491	0.716846	0.373923	1.19284	1.01719	1.17973	0.119444	0.306111	0.51534
6	0.2.27.1.4.4.3	Lactobacillaceae_g_unclassified	0	44	7	4	2	0	4	1	2	0	4	3	2	0	0	1	2	0	0	1	0	0	2	3	5	1		Lactobacillaceae_g_unclassified	0.103123	0.0324596	0.0389332	0	0.0770119	0.0127632	0.0260112	0	0.0650089	0.0547845	0.0602047	0	0	0.0152929	0.0350754	0	0	0.0109325	0
5	0.2.27.1.4.9	Streptococcaceae	3	993	32	71	31	26	39	59	19	25	36	32	21	20	68	34	31	77	13	21	95	64	18	96	48	17		Streptococcaceae	0.47142	0.576158	0.603465	0.270749	0.750866	0.753031	0.247106	0.470544	0.58508	0.584368	0.632149	0.286738	1.10551	0.519957	0.543669	1.12147	0.110912	0.229583	1.13854
6	0.2.27.1.4.9.1	Lactococcus	0	1	0	0	0	0	0	0	0	0	0	0	0	0	0	0	0	0	0	0	0	0	0	1	0	0		Lactococcus	0	0	0	0	0	0	0	0	0	0	0	0	0	0	0	0	0	0	0
6	0.2.27.1.4.9.2	Streptococcus	0	991	32	71	31	26	39	59	19	25	36	32	21	20	68	34	31	77	13	21	95	63	18	95	48	17		Streptococcus	0.47142	0.576158	0.603465	0.270749	0.750866	0.753031	0.247106	0.470544	0.58508	0.584368	0.632149	0.286738	1.10551	0.519957	0.543669	1.12147	0.110912	0.229583	1.13854
6	0.2.27.1.4.9.3	Streptococcaceae_g_unclassified	0	1	0	0	0	0	0	0	0	0	0	0	0	0	0	0	0	0	0	0	0	1	0	0	0	0		Streptococcaceae_g_unclassified	0	0	0	0	0	0	0	0	0	0	0	0	0	0	0	0	0	0	0
5	0.2.27.1.4.10	Lactobacillales_f_unclassified	1	2504	178	198	144	120	104	238	99	113	143	80	57	47	50	76	80	99	29	43	84	61	79	212	119	51		Lactobacillales_f_unclassified	2.62227	1.60675	2.80319	1.24961	2.00231	3.03765	1.28755	2.12686	2.32407	1.46092	1.71583	0.673835	0.812876	1.16226	1.40302	1.44189	0.247419	0.470099	1.00671
6	0.2.27.1.4.10.1	Lactobacillales_f_g_unclassified	0	2504	178	198	144	120	104	238	99	113	143	80	57	47	50	76	80	99	29	43	84	61	79	212	119	51		Lactobacillales_f_g_unclassified	2.62227	1.60675	2.80319	1.24961	2.00231	3.03765	1.28755	2.12686	2.32407	1.46092	1.71583	0.673835	0.812876	1.16226	1.40302	1.44189	0.247419	0.470099	1.00671
4	0.2.27.1.7	Bacilli_o_unclassified	1	239	17	21	11	10	8	18	11	14	17	8	2	5	5	9	7	11	1	4	4	7	7	19	17	6		Bacilli_o_unclassified	0.250442	0.170413	0.214133	0.104134	0.154024	0.229738	0.143062	0.263505	0.276288	0.146092	0.0602047	0.0716846	0.0812876	0.137636	0.122764	0.16021	0.0085317	0.0437302	0.0479386
5	0.2.27.1.7.1	Bacilli_o_f_unclassified	1	239	17	21	11	10	8	18	11	14	17	8	2	5	5	9	7	11	1	4	4	7	7	19	17	6		Bacilli_o_f_unclassified	0.250442	0.170413	0.214133	0.104134	0.154024	0.229738	0.143062	0.263505	0.276288	0.146092	0.0602047	0.0716846	0.0812876	0.137636	0.122764	0.16021	0.0085317	0.0437302	0.0479386
6	0.2.27.1.7.1.1	Bacilli_o_f_g_unclassified	0	239	17	21	11	10	8	18	11	14	17	8	2	5	5	9	7	11	1	4	4	7	7	19	17	6		Bacilli_o_f_g_unclassified	0.250442	0.170413	0.214133	0.104134	0.154024	0.229738	0.143062	0.263505	0.276288	0.146092	0.0602047	0.0716846	0.0812876	0.137636	0.122764	0.16021	0.0085317	0.0437302	0.0479386
3	0.2.27.2	Clostridia	2	13333	529	521	251	457	411	714	398	252	384	189	224	551	859	785	681	703	782	783	753	743	679	509	666	509		Clostridia	7.79316	4.22787	4.88612	4.75893	7.91298	9.11295	5.17623	4.74308	6.24086	3.45142	6.74293	7.89964	13.9652	12.0049	11.9432	10.2389	6.67179	8.56018	9.02445
4	0.2.27.2.2	Clostridiales	10	13172	521	510	249	454	404	706	397	247	379	189	223	543	846	772	673	691	774	779	748	734	668	504	662	499		Clostridiales	7.67531	4.1386	4.84719	4.72769	7.77821	9.01085	5.16322	4.64897	6.1596	3.45142	6.71282	7.78495	13.7539	11.8061	11.8029	10.0641	6.60353	8.51645	8.96453
5	0.2.27.2.2.3	Christensenellaceae	1	41	5	1	0	4	1	0	0	0	1	0	0	0	2	3	0	4	10	2	3	2	1	2	0	0		Christensenellaceae	0.0736594	0.00811491	0	0.0416536	0.019253	0	0	0	0.0162522	0	0	0	0.032515	0.0458786	0	0.0582581	0.085317	0.0218651	0.035954
6	0.2.27.2.2.3.3	Christensenellaceae_R-7_group	0	41	5	1	0	4	1	0	0	0	1	0	0	0	2	3	0	4	10	2	3	2	1	2	0	0		Christensenellaceae_R-7_group	0.0736594	0.00811491	0	0.0416536	0.019253	0	0	0	0.0162522	0	0	0	0.032515	0.0458786	0	0.0582581	0.085317	0.0218651	0.035954
5	0.2.27.2.2.4	Clostridiaceae_1	2	17	0	0	0	0	0	1	2	0	3	2	0	0	0	2	0	0	0	0	3	1	0	1	1	1		Clostridiaceae_1	0	0	0	0	0	0.0127632	0.0260112	0	0.0487567	0.036523	0	0	0	0.0305857	0	0	0	0	0.035954
6	0.2.27.2.2.4.4	Clostridium_sensu_stricto_1	0	5	0	0	0	0	0	0	2	0	3	0	0	0	0	0	0	0	0	0	0	0	0	0	0	0		Clostridium_sensu_stricto_1	0	0	0	0	0	0	0.0260112	0	0.0487567	0	0	0	0	0	0	0	0	0	0
6	0.2.27.2.2.4.29	Clostridiaceae_1_g_unclassified	0	12	0	0	0	0	0	1	0	0	0	2	0	0	0	2	0	0	0	0	3	1	0	1	1	1		Clostridiaceae_1_g_unclassified	0	0	0	0	0	0.0127632	0	0	0	0.036523	0	0	0	0.0305857	0	0	0	0	0.035954
5	0.2.27.2.2.9	Clostridiales_vadinBB60_group	1	2	1	0	0	0	0	0	0	0	0	0	0	0	1	0	0	0	0	0	0	0	0	0	0	0		Clostridiales_vadinBB60_group	0.0147319	0	0	0	0	0	0	0	0	0	0	0	0.0162575	0	0	0	0	0	0
6	0.2.27.2.2.9.1	Clostridiales_vadinBB60_group_g_unclassified	0	2	1	0	0	0	0	0	0	0	0	0	0	0	1	0	0	0	0	0	0	0	0	0	0	0		Clostridiales_vadinBB60_group_g_unclassified	0.0147319	0	0	0	0	0	0	0	0	0	0	0	0.0162575	0	0	0	0	0	0
5	0.2.27.2.2.13	Family_XI	2	3	0	0	0	0	0	0	0	0	0	0	0	0	0	1	0	0	0	1	0	1	0	0	0	0		Family_XI	0	0	0	0	0	0	0	0	0	0	0	0	0	0.0152929	0	0	0	0.0109325	0
6	0.2.27.2.2.13.5	Finegoldia	0	2	0	0	0	0	0	0	0	0	0	0	0	0	0	1	0	0	0	0	0	1	0	0	0	0		Finegoldia	0	0	0	0	0	0	0	0	0	0	0	0	0	0.0152929	0	0	0	0	0
6	0.2.27.2.2.13.17	Tissierella	0	1	0	0	0	0	0	0	0	0	0	0	0	0	0	0	0	0	0	1	0	0	0	0	0	0		Tissierella	0	0	0	0	0	0	0	0	0	0	0	0	0	0	0	0	0	0.0109325	0
5	0.2.27.2.2.15	Family_XIII	7	1351	46	51	30	59	59	76	54	16	42	18	18	59	75	34	27	84	52	62	98	117	65	72	91	46		Family_XIII	0.677666	0.41386	0.583998	0.614391	1.13593	0.970006	0.702302	0.301148	0.682594	0.328707	0.541842	0.845878	1.21931	0.519957	0.473518	1.22342	0.443648	0.677818	1.1745
6	0.2.27.2.2.15.1	Anaerovorax	0	263	3	7	1	7	4	8	4	3	3	1	4	0	20	6	5	31	14	19	36	18	18	18	20	13		Anaerovorax	0.0441956	0.0568043	0.0194666	0.0728939	0.0770119	0.102106	0.0520224	0.0564653	0.0487567	0.0182615	0.120409	0	0.32515	0.0917571	0.0876885	0.4515	0.119444	0.207718	0.431448
6	0.2.27.2.2.15.2	Family_XIII_AD3011_group	0	122	4	3	3	7	0	11	2	2	4	4	0	1	13	3	6	11	4	3	7	12	4	12	4	2		Family_XIII_AD3011_group	0.0589275	0.0243447	0.0583998	0.0728939	0	0.140396	0.0260112	0.0376435	0.0650089	0.073046	0	0.0143369	0.211348	0.0458786	0.105226	0.16021	0.0341268	0.0327976	0.0838926
6	0.2.27.2.2.15.3	Family_XIII_UCG-001	0	415	26	19	16	22	45	47	32	3	18	7	7	45	13	6	2	6	0	9	7	24	10	7	32	12		Family_XIII_UCG-001	0.383029	0.154183	0.311466	0.229095	0.866384	0.599872	0.416179	0.0564653	0.29254	0.127831	0.210716	0.645161	0.211348	0.0917571	0.0350754	0.0873871	0	0.0983929	0.0838926
6	0.2.27.2.2.15.6	Mogibacterium	0	24	1	0	0	0	0	0	0	0	0	0	0	0	0	3	1	6	1	3	2	1	0	3	1	2		Mogibacterium	0.0147319	0	0	0	0	0	0	0	0	0	0	0	0	0.0458786	0.0175377	0.0873871	0.0085317	0.0327976	0.0239693
6	0.2.27.2.2.15.7	[Eubacterium]_brachy_group	0	20	1	2	0	1	0	1	1	0	2	1	1	2	0	0	0	1	1	1	0	2	0	1	1	1		[Eubacterium]_brachy_group	0.0147319	0.0162298	0	0.0104134	0	0.0127632	0.0130056	0	0.0325045	0.0182615	0.0301023	0.0286738	0	0	0	0.0145645	0.0085317	0.0109325	0
6	0.2.27.2.2.15.8	[Eubacterium]_nodatum_group	0	1	0	0	0	0	0	0	0	0	0	0	0	0	0	0	0	0	0	0	1	0	0	0	0	0		[Eubacterium]_nodatum_group	0	0	0	0	0	0	0	0	0	0	0	0	0	0	0	0	0	0	0.0119847
6	0.2.27.2.2.15.9	Family_XIII_g_unclassified	0	506	11	20	10	22	10	9	15	8	15	5	6	11	29	16	13	29	32	27	45	60	33	31	33	16		Family_XIII_g_unclassified	0.162051	0.162298	0.194666	0.229095	0.19253	0.114869	0.195084	0.150574	0.243784	0.0913075	0.180614	0.157706	0.471468	0.244686	0.22799	0.422371	0.273014	0.295179	0.53931
5	0.2.27.2.2.25	Lachnospiraceae	27	2030	74	75	46	98	148	136	92	21	70	57	54	193	118	32	27	65	53	95	54	161	117	58	55	131		Lachnospiraceae	1.09016	0.608618	0.895464	1.02051	2.84944	1.7358	1.19651	0.395257	1.13766	1.04091	1.62553	2.76703	1.91839	0.489371	0.473518	0.946694	0.45218	1.03859	0.647172
6	0.2.27.2.2.25.1	Acetatifactor	0	8	0	0	0	0	0	0	2	0	0	0	1	0	2	0	0	0	1	1	0	0	0	0	0	1		Acetatifactor	0	0	0	0	0	0	0.0260112	0	0	0	0.0301023	0	0.032515	0	0	0	0.0085317	0.0109325	0
6	0.2.27.2.2.25.4	Anaerostipes	0	22	0	0	0	4	0	6	0	0	2	0	0	0	0	3	2	1	0	0	0	0	1	2	1	0		Anaerostipes	0	0	0	0.0416536	0	0.0765795	0	0	0.0325045	0	0	0	0	0.0458786	0.0350754	0.0145645	0	0	0
6	0.2.27.2.2.25.5	Blautia	0	12	1	0	0	1	0	0	1	0	2	0	0	0	0	0	1	2	0	0	1	0	0	3	0	0		Blautia	0.0147319	0	0	0.0104134	0	0	0.0130056	0	0.0325045	0	0	0	0	0	0.0175377	0.029129	0	0	0.0119847
6	0.2.27.2.2.25.10	Coprococcus_1	0	7	0	0	0	0	0	0	0	0	0	0	0	1	3	0	0	1	0	0	0	1	0	0	1	0		Coprococcus_1	0	0	0	0	0	0	0	0	0	0	0	0.0143369	0.0487726	0	0	0.0145645	0	0	0
6	0.2.27.2.2.25.11	Coprococcus_2	0	3	1	0	0	0	0	0	1	0	0	0	0	0	0	0	0	1	0	0	0	0	0	0	0	0		Coprococcus_2	0.0147319	0	0	0	0	0	0.0130056	0	0	0	0	0	0	0	0	0.0145645	0	0	0
6	0.2.27.2.2.25.13	Dorea	0	3	0	0	0	0	0	0	0	0	0	1	0	0	0	0	0	0	0	0	1	0	0	1	0	0		Dorea	0	0	0	0	0	0	0	0	0	0.0182615	0	0	0	0	0	0	0	0	0.0119847
6	0.2.27.2.2.25.14	Eisenbergiella	0	3	0	1	0	0	0	0	0	0	0	0	0	0	0	0	0	0	0	0	0	0	0	0	2	0		Eisenbergiella	0	0.00811491	0	0	0	0	0	0	0	0	0	0	0	0	0	0	0	0	0
6	0.2.27.2.2.25.16	Fusicatenibacter	0	15	0	0	0	0	0	0	0	0	2	0	0	0	0	0	0	5	0	0	2	0	2	3	1	0		Fusicatenibacter	0	0	0	0	0	0	0	0	0.0325045	0	0	0	0	0	0	0.0728226	0	0	0.0239693
6	0.2.27.2.2.25.20	Incertae_Sedis	0	10	0	0	0	1	2	0	3	1	0	0	0	2	0	0	0	0	0	0	0	0	0	0	0	1		Incertae_Sedis	0	0	0	0.0104134	0.038506	0	0.0390168	0.0188218	0	0	0	0.0286738	0	0	0	0	0	0	0
6	0.2.27.2.2.25.29	Lachnospira	0	5	0	0	1	0	0	0	0	0	0	0	0	1	0	0	0	0	0	0	1	0	0	0	0	2		Lachnospira	0	0	0.0194666	0	0	0	0	0	0	0	0	0.0143369	0	0	0	0	0	0	0.0119847
6	0.2.27.2.2.25.31	Lachnospiraceae_FCS020_group	0	2	0	0	0	0	0	0	0	0	0	1	0	0	0	0	0	1	0	0	0	0	0	0	0	0		Lachnospiraceae_FCS020_group	0	0	0	0	0	0	0	0	0	0.0182615	0	0	0	0	0	0.0145645	0	0	0
6	0.2.27.2.2.25.34	Lachnospiraceae_ND3007_group	0	8	0	0	0	0	0	0	0	0	0	0	0	0	0	3	0	4	0	0	0	0	0	1	0	0		Lachnospiraceae_ND3007_group	0	0	0	0	0	0	0	0	0	0	0	0	0	0.0458786	0	0.0582581	0	0	0
6	0.2.27.2.2.25.36	Lachnospiraceae_NK4A136_group	0	163	7	3	4	12	16	20	5	1	7	7	7	6	9	2	0	5	4	12	4	10	8	3	2	9		Lachnospiraceae_NK4A136_group	0.103123	0.0243447	0.0778665	0.124961	0.308048	0.255265	0.065028	0.0188218	0.113766	0.127831	0.210716	0.0860215	0.146318	0.0305857	0	0.0728226	0.0341268	0.131191	0.0479386
6	0.2.27.2.2.25.37	Lachnospiraceae_NK4B4_group	0	5	0	0	0	0	0	0	0	0	0	0	0	0	1	0	0	0	0	0	2	0	2	0	0	0		Lachnospiraceae_NK4B4_group	0	0	0	0	0	0	0	0	0	0	0	0	0.0162575	0	0	0	0	0	0.0239693
6	0.2.27.2.2.25.38	Lachnospiraceae_UCG-001	0	34	1	4	1	6	2	0	1	0	0	2	1	15	0	0	0	0	0	0	0	0	0	0	0	1		Lachnospiraceae_UCG-001	0.0147319	0.0324596	0.0194666	0.0624805	0.038506	0	0.0130056	0	0	0.036523	0.0301023	0.215054	0	0	0	0	0	0	0
6	0.2.27.2.2.25.42	Lachnospiraceae_UCG-005	0	3	0	0	0	1	0	0	1	0	0	0	0	1	0	0	0	0	0	0	0	0	0	0	0	0		Lachnospiraceae_UCG-005	0	0	0	0.0104134	0	0	0.0130056	0	0	0	0	0.0143369	0	0	0	0	0	0	0
6	0.2.27.2.2.25.43	Lachnospiraceae_UCG-006	0	12	3	0	1	0	3	2	0	0	0	1	0	1	0	0	0	0	0	0	0	1	0	0	0	0		Lachnospiraceae_UCG-006	0.0441956	0	0.0194666	0	0.057759	0.0255265	0	0	0	0.0182615	0	0.0143369	0	0	0	0	0	0	0
6	0.2.27.2.2.25.49	Lactonifactor	0	2	0	1	0	0	0	0	0	0	0	0	0	0	1	0	0	0	0	0	0	0	0	0	0	0		Lactonifactor	0	0.00811491	0	0	0	0	0	0	0	0	0	0	0.0162575	0	0	0	0	0	0
6	0.2.27.2.2.25.50	Marvinbryantia	0	6	0	0	0	2	0	0	0	0	0	0	0	1	0	0	0	1	0	0	0	0	2	0	0	0		Marvinbryantia	0	0	0	0.0208268	0	0	0	0	0	0	0	0.0143369	0	0	0	0.0145645	0	0	0
6	0.2.27.2.2.25.54	Oribacterium	0	2	0	0	0	0	0	0	0	0	1	0	0	0	0	0	0	0	0	0	0	0	0	1	0	0		Oribacterium	0	0	0	0	0	0	0	0	0.0162522	0	0	0	0	0	0	0	0	0	0
6	0.2.27.2.2.25.55	Parasporobacterium	0	8	0	0	1	0	1	0	0	0	0	0	0	1	0	0	0	0	1	1	0	1	0	0	1	1		Parasporobacterium	0	0	0.0194666	0	0.019253	0	0	0	0	0	0	0.0143369	0	0	0	0	0.0085317	0.0109325	0
6	0.2.27.2.2.25.58	Roseburia	0	8	2	1	0	0	2	0	1	0	0	0	0	2	0	0	0	0	0	0	0	0	0	0	0	0		Roseburia	0.0294638	0.00811491	0	0	0.038506	0	0.0130056	0	0	0	0	0.0286738	0	0	0	0	0	0	0
6	0.2.27.2.2.25.63	Tyzzerella	0	2	0	0	0	1	0	0	0	0	0	0	0	0	0	0	0	0	0	0	0	0	0	0	1	0		Tyzzerella	0	0	0	0.0104134	0	0	0	0	0	0	0	0	0	0	0	0	0	0	0
6	0.2.27.2.2.25.64	Tyzzerella_3	0	1	0	0	0	0	1	0	0	0	0	0	0	0	0	0	0	0	0	0	0	0	0	0	0	0		Tyzzerella_3	0	0	0	0	0.019253	0	0	0	0	0	0	0	0	0	0	0	0	0	0
6	0.2.27.2.2.25.70	[Eubacterium]_ruminantium_group	0	6	2	0	0	0	0	0	0	0	0	0	0	0	1	0	0	0	0	0	1	0	0	1	0	1		[Eubacterium]_ruminantium_group	0.0294638	0	0	0	0	0	0	0	0	0	0	0	0.0162575	0	0	0	0	0	0.0119847
6	0.2.27.2.2.25.71	[Eubacterium]_ventriosum_group	0	6	0	0	0	0	0	0	0	0	0	0	0	0	0	0	1	2	2	0	0	1	0	0	0	0		[Eubacterium]_ventriosum_group	0	0	0	0	0	0	0	0	0	0	0	0	0	0	0.0175377	0.029129	0.0170634	0	0
6	0.2.27.2.2.25.75	Lachnospiraceae_g_unclassified	0	1674	57	65	38	70	121	108	77	19	56	45	45	162	101	24	23	42	45	81	42	147	102	43	46	115		Lachnospiraceae_g_unclassified	0.839717	0.527469	0.739731	0.728939	2.32961	1.37843	1.00143	0.357613	0.910125	0.821768	1.35461	2.32258	1.64201	0.367029	0.403367	0.61171	0.383926	0.885536	0.503356
5	0.2.27.2.2.28	Peptococcaceae	1	5	0	0	0	0	0	0	0	0	0	0	0	0	2	0	0	0	0	2	0	1	0	0	0	0		Peptococcaceae	0	0	0	0	0	0	0	0	0	0	0	0	0.032515	0	0	0	0	0.0218651	0
6	0.2.27.2.2.28.11	Peptococcus	0	5	0	0	0	0	0	0	0	0	0	0	0	0	2	0	0	0	0	2	0	1	0	0	0	0		Peptococcus	0	0	0	0	0	0	0	0	0	0	0	0	0.032515	0	0	0	0	0.0218651	0
5	0.2.27.2.2.29	Peptostreptococcaceae	5	3204	135	167	79	80	26	205	77	89	80	41	55	81	209	293	243	237	197	147	174	111	149	143	128	58		Peptostreptococcaceae	1.9888	1.35519	1.53786	0.833073	0.500578	2.61646	1.00143	1.67514	1.30018	0.748722	1.65563	1.16129	3.39782	4.48081	4.26166	3.45179	1.68074	1.60708	2.08533
6	0.2.27.2.2.29.4	Intestinibacter	0	2	0	0	0	0	0	0	0	0	0	0	0	0	0	1	0	0	0	0	0	0	1	0	0	0		Intestinibacter	0	0	0	0	0	0	0	0	0	0	0	0	0	0.0152929	0	0	0	0	0
6	0.2.27.2.2.29.6	Peptostreptococcus	0	3	0	0	0	2	0	0	0	0	0	0	0	0	0	0	0	0	0	0	0	0	0	1	0	0		Peptostreptococcus	0	0	0	0.0208268	0	0	0	0	0	0	0	0	0	0	0	0	0	0	0
6	0.2.27.2.2.29.8	Romboutsia	0	1726	67	97	49	34	15	120	43	43	48	20	34	37	121	164	122	143	99	76	85	56	77	83	69	24		Romboutsia	0.987036	0.787146	0.953864	0.354056	0.288795	1.53159	0.55924	0.809336	0.780107	0.36523	1.02348	0.530466	1.96716	2.50803	2.1396	2.08273	0.844638	0.830874	1.0187
6	0.2.27.2.2.29.11	Terrisporobacter	0	1	0	0	0	0	0	0	0	0	0	0	0	0	0	0	0	0	0	0	0	0	0	0	0	1		Terrisporobacter	0	0	0	0	0	0	0	0	0	0	0	0	0	0	0	0	0	0	0
6	0.2.27.2.2.29.12	Peptostreptococcaceae_g_unclassified	0	1472	68	70	30	44	11	85	34	46	32	21	21	44	88	128	121	94	98	71	89	55	71	59	59	33		Peptostreptococcaceae_g_unclassified	1.00177	0.568043	0.583998	0.45819	0.211783	1.08488	0.44219	0.865801	0.520072	0.383492	0.632149	0.630824	1.43066	1.95749	2.12206	1.36906	0.836106	0.776211	1.06663
5	0.2.27.2.2.30	Ruminococcaceae	31	3343	132	88	30	134	121	92	89	71	106	44	53	129	212	195	194	97	246	302	222	195	159	94	184	154		Ruminococcaceae	1.94461	0.714112	0.583998	1.3954	2.32961	1.17422	1.1575	1.33634	1.72274	0.803506	1.59542	1.84946	3.44659	2.98211	3.40231	1.41276	2.0988	3.30163	2.66059
6	0.2.27.2.2.30.1	Acetanaerobacterium	0	4	0	0	0	0	0	0	0	0	0	0	0	0	0	0	1	1	1	0	0	1	0	0	0	0		Acetanaerobacterium	0	0	0	0	0	0	0	0	0	0	0	0	0	0	0.0175377	0.0145645	0.0085317	0	0
6	0.2.27.2.2.30.4	Anaerofilum	0	31	4	0	0	2	0	0	0	2	3	1	0	0	5	1	0	2	2	1	1	4	0	0	0	3		Anaerofilum	0.0589275	0	0	0.0208268	0	0	0	0.0376435	0.0487567	0.0182615	0	0	0.0812876	0.0152929	0	0.029129	0.0170634	0.0109325	0.0119847
6	0.2.27.2.2.30.5	Anaerotruncus	0	284	15	11	3	15	15	5	8	11	6	6	11	23	8	12	12	4	19	12	12	15	19	11	11	20		Anaerotruncus	0.220978	0.089264	0.0583998	0.156201	0.288795	0.0638162	0.104045	0.207039	0.0975134	0.109569	0.331126	0.329749	0.13006	0.183514	0.210452	0.0582581	0.162102	0.131191	0.143816
6	0.2.27.2.2.30.6	Butyricicoccus	0	1	0	0	0	0	0	0	0	0	0	0	1	0	0	0	0	0	0	0	0	0	0	0	0	0		Butyricicoccus	0	0	0	0	0	0	0	0	0	0	0.0301023	0	0	0	0	0	0	0	0
6	0.2.27.2.2.30.7	Candidatus_Soleaferrea	0	4	1	1	0	0	1	0	0	0	0	0	0	0	0	0	0	0	1	0	0	0	0	0	0	0		Candidatus_Soleaferrea	0.0147319	0.00811491	0	0	0.019253	0	0	0	0	0	0	0	0	0	0	0	0.0085317	0	0
6	0.2.27.2.2.30.9	Faecalibacterium	0	6	0	0	0	0	0	0	1	1	4	0	0	0	0	0	0	0	0	0	0	0	0	0	0	0		Faecalibacterium	0	0	0	0	0	0	0.0130056	0.0188218	0.0650089	0	0	0	0	0	0	0	0	0	0
6	0.2.27.2.2.30.11	Flavonifractor	0	1	0	0	0	0	0	0	0	0	0	0	0	0	1	0	0	0	0	0	0	0	0	0	0	0		Flavonifractor	0	0	0	0	0	0	0	0	0	0	0	0	0.0162575	0	0	0	0	0	0
6	0.2.27.2.2.30.12	Hydrogenoanaerobacterium	0	2	0	0	0	0	0	0	0	0	0	0	0	0	1	0	0	0	0	0	0	0	1	0	0	0		Hydrogenoanaerobacterium	0	0	0	0	0	0	0	0	0	0	0	0	0.0162575	0	0	0	0	0	0
6	0.2.27.2.2.30.13	Intestinimonas	0	24	3	1	0	0	5	0	0	0	0	1	0	1	2	0	0	0	0	4	2	3	1	0	1	0		Intestinimonas	0.0441956	0.00811491	0	0	0.0962649	0	0	0	0	0.0182615	0	0.0143369	0.032515	0	0	0	0	0.0437302	0.0239693
6	0.2.27.2.2.30.14	Oscillibacter	0	36	1	2	2	1	1	1	2	1	4	1	2	2	4	0	1	1	2	0	0	2	1	0	1	4		Oscillibacter	0.0147319	0.0162298	0.0389332	0.0104134	0.019253	0.0127632	0.0260112	0.0188218	0.0650089	0.0182615	0.0602047	0.0286738	0.0650301	0	0.0175377	0.0145645	0.0170634	0	0
6	0.2.27.2.2.30.15	Oscillospira	0	3	0	0	0	0	0	0	0	1	0	0	0	0	0	0	0	0	2	0	0	0	0	0	0	0		Oscillospira	0	0	0	0	0	0	0	0.0188218	0	0	0	0	0	0	0	0	0.0170634	0	0
6	0.2.27.2.2.30.16	Papillibacter	0	3	0	0	0	0	0	0	0	0	0	0	0	0	0	0	0	0	0	1	0	2	0	0	0	0		Papillibacter	0	0	0	0	0	0	0	0	0	0	0	0	0	0	0	0	0	0.0109325	0
6	0.2.27.2.2.30.18	Pseudoflavonifractor	0	18	2	0	1	2	1	1	0	1	1	1	0	1	2	0	1	0	0	0	0	1	0	1	1	1		Pseudoflavonifractor	0.0294638	0	0.0194666	0.0208268	0.019253	0.0127632	0	0.0188218	0.0162522	0.0182615	0	0.0143369	0.032515	0	0.0175377	0	0	0	0
6	0.2.27.2.2.30.21	Ruminiclostridium_5	0	103	3	5	1	2	5	4	1	3	5	0	0	1	4	7	6	10	2	1	4	13	5	7	10	4		Ruminiclostridium_5	0.0441956	0.0405745	0.0194666	0.0208268	0.0962649	0.051053	0.0130056	0.0564653	0.0812612	0	0	0.0143369	0.0650301	0.10705	0.105226	0.145645	0.0170634	0.0109325	0.0479386
6	0.2.27.2.2.30.22	Ruminiclostridium_6	0	24	2	2	0	1	0	1	0	1	0	0	0	3	3	4	3	0	0	1	0	2	0	0	1	0		Ruminiclostridium_6	0.0294638	0.0162298	0	0.0104134	0	0.0127632	0	0.0188218	0	0	0	0.0430108	0.0487726	0.0611714	0.0526131	0	0	0.0109325	0
6	0.2.27.2.2.30.23	Ruminiclostridium_9	0	28	0	1	0	0	1	1	0	0	1	1	1	2	7	1	0	4	1	1	1	0	0	1	1	3		Ruminiclostridium_9	0	0.00811491	0	0	0.019253	0.0127632	0	0	0.0162522	0.0182615	0.0301023	0.0286738	0.113803	0.0152929	0	0.0582581	0.0085317	0.0109325	0.0119847
6	0.2.27.2.2.30.24	Ruminococcaceae_NK4A214_group	0	45	3	0	0	3	0	0	0	1	1	2	0	0	5	1	0	3	2	6	4	3	0	4	4	3		Ruminococcaceae_NK4A214_group	0.0441956	0	0	0.0312402	0	0	0	0.0188218	0.0162522	0.036523	0	0	0.0812876	0.0152929	0	0.0436936	0.0170634	0.0655953	0.0479386
6	0.2.27.2.2.30.26	Ruminococcaceae_UCG-002	0	5	0	0	0	0	0	0	0	0	0	0	0	0	0	0	0	0	5	0	0	0	0	0	0	0		Ruminococcaceae_UCG-002	0	0	0	0	0	0	0	0	0	0	0	0	0	0	0	0	0.0426585	0	0
6	0.2.27.2.2.30.27	Ruminococcaceae_UCG-003	0	15	1	0	1	1	0	1	1	0	0	0	0	6	1	0	0	0	0	0	0	1	0	0	0	2		Ruminococcaceae_UCG-003	0.0147319	0	0.0194666	0.0104134	0	0.0127632	0.0130056	0	0	0	0	0.0860215	0.0162575	0	0	0	0	0	0
6	0.2.27.2.2.30.29	Ruminococcaceae_UCG-005	0	57	0	0	0	7	0	1	0	0	3	1	0	1	0	3	4	0	12	5	8	0	4	3	2	3		Ruminococcaceae_UCG-005	0	0	0	0.0728939	0	0.0127632	0	0	0.0487567	0.0182615	0	0.0143369	0	0.0458786	0.0701508	0	0.10238	0.0546627	0.0958773
6	0.2.27.2.2.30.30	Ruminococcaceae_UCG-007	0	7	1	0	0	0	0	0	0	0	0	0	0	0	0	0	0	1	0	0	1	2	0	0	1	1		Ruminococcaceae_UCG-007	0.0147319	0	0	0	0	0	0	0	0	0	0	0	0	0	0	0.0145645	0	0	0.0119847
6	0.2.27.2.2.30.31	Ruminococcaceae_UCG-008	0	12	0	0	0	0	0	2	0	1	6	0	0	1	0	0	0	1	0	0	0	0	0	1	0	0		Ruminococcaceae_UCG-008	0	0	0	0	0	0.0255265	0	0.0188218	0.0975134	0	0	0.0143369	0	0	0	0.0145645	0	0	0
6	0.2.27.2.2.30.32	Ruminococcaceae_UCG-009	0	12	0	0	0	0	0	0	0	0	0	0	1	0	1	1	2	0	1	0	0	3	2	0	0	1		Ruminococcaceae_UCG-009	0	0	0	0	0	0	0	0	0	0	0.0301023	0	0.0162575	0.0152929	0.0350754	0	0.0085317	0	0
6	0.2.27.2.2.30.33	Ruminococcaceae_UCG-010	0	4	0	0	0	0	0	0	0	0	2	0	0	0	0	0	1	0	1	0	0	0	0	0	0	0		Ruminococcaceae_UCG-010	0	0	0	0	0	0	0	0	0.0325045	0	0	0	0	0	0.0175377	0	0.0085317	0	0
6	0.2.27.2.2.30.36	Ruminococcaceae_UCG-013	0	61	1	4	4	1	0	3	1	1	3	0	0	1	4	3	7	1	2	6	4	5	5	0	3	2		Ruminococcaceae_UCG-013	0.0147319	0.0324596	0.0778665	0.0104134	0	0.0382897	0.0130056	0.0188218	0.0487567	0	0	0.0143369	0.0650301	0.0458786	0.122764	0.0145645	0.0170634	0.0655953	0.0479386
6	0.2.27.2.2.30.37	Ruminococcaceae_UCG-014	0	879	3	4	3	11	8	6	7	6	9	3	0	0	21	108	109	35	47	166	105	45	36	29	92	26		Ruminococcaceae_UCG-014	0.0441956	0.0324596	0.0583998	0.114548	0.154024	0.0765795	0.0910391	0.112931	0.14627	0.0547845	0	0	0.341408	1.65163	1.91161	0.509758	0.40099	1.8148	1.25839
6	0.2.27.2.2.30.39	Ruminococcus_1	0	107	5	0	0	8	7	8	7	4	6	1	2	3	2	2	8	0	12	7	6	5	5	0	6	3		Ruminococcus_1	0.0736594	0	0	0.0833073	0.134771	0.102106	0.0910391	0.075287	0.0975134	0.0182615	0.0602047	0.0430108	0.032515	0.0305857	0.140302	0	0.10238	0.0765278	0.071908
6	0.2.27.2.2.30.40	Ruminococcus_2	0	15	4	0	0	0	1	0	0	2	0	0	0	0	0	0	0	0	5	0	0	0	1	0	2	0		Ruminococcus_2	0.0589275	0	0	0	0.019253	0	0	0.0376435	0	0	0	0	0	0	0	0	0.0426585	0	0
6	0.2.27.2.2.30.43	Subdoligranulum	0	1	0	0	0	0	0	0	1	0	0	0	0	0	0	0	0	0	0	0	0	0	0	0	0	0		Subdoligranulum	0	0	0	0	0	0	0.0130056	0	0	0	0	0	0	0	0	0	0	0	0
6	0.2.27.2.2.30.44	[Eubacterium]_coprostanoligenes_group	0	98	4	3	1	2	2	8	1	1	2	4	1	3	7	5	4	0	16	18	3	0	2	2	5	4		[Eubacterium]_coprostanoligenes_group	0.0589275	0.0243447	0.0194666	0.0208268	0.038506	0.102106	0.0130056	0.0188218	0.0325045	0.073046	0.0301023	0.0430108	0.113803	0.0764643	0.0701508	0	0.136507	0.196786	0.035954
6	0.2.27.2.2.30.45	Ruminococcaceae_g_unclassified	0	1453	79	54	14	78	74	50	59	34	50	22	34	81	134	47	35	34	113	73	71	88	77	35	43	74		Ruminococcaceae_g_unclassified	1.16382	0.438205	0.272533	0.812246	1.42472	0.638162	0.76733	0.63994	0.812612	0.401753	1.02348	1.16129	2.17851	0.718764	0.61382	0.495194	0.964082	0.798076	0.850911
5	0.2.27.2.2.37	Clostridiales_f_unclassified	1	3176	128	128	64	79	49	196	83	50	77	27	43	81	227	212	182	204	216	168	194	145	177	134	203	109		Clostridiales_f_unclassified	1.88568	1.03871	1.24586	0.82266	0.943396	2.5016	1.07946	0.941088	1.25142	0.493061	1.2944	1.16129	3.69046	3.24209	3.19186	2.97116	1.84285	1.83667	2.32502
6	0.2.27.2.2.37.1	Clostridiales_f_g_unclassified	0	3176	128	128	64	79	49	196	83	50	77	27	43	81	227	212	182	204	216	168	194	145	177	134	203	109		Clostridiales_f_g_unclassified	1.88568	1.03871	1.24586	0.82266	0.943396	2.5016	1.07946	0.941088	1.25142	0.493061	1.2944	1.16129	3.69046	3.24209	3.19186	2.97116	1.84285	1.83667	2.32502
4	0.2.27.2.9	Clostridia_o_unclassified	1	161	8	11	2	3	7	8	1	5	5	0	1	8	13	13	8	12	8	4	5	9	11	5	4	10		Clostridia_o_unclassified	0.117855	0.089264	0.0389332	0.0312402	0.134771	0.102106	0.0130056	0.0941088	0.0812612	0	0.0301023	0.114695	0.211348	0.198807	0.140302	0.174774	0.0682536	0.0437302	0.0599233
5	0.2.27.2.9.1	Clostridia_o_f_unclassified	1	161	8	11	2	3	7	8	1	5	5	0	1	8	13	13	8	12	8	4	5	9	11	5	4	10		Clostridia_o_f_unclassified	0.117855	0.089264	0.0389332	0.0312402	0.134771	0.102106	0.0130056	0.0941088	0.0812612	0	0.0301023	0.114695	0.211348	0.198807	0.140302	0.174774	0.0682536	0.0437302	0.0599233
6	0.2.27.2.9.1.1	Clostridia_o_f_g_unclassified	0	161	8	11	2	3	7	8	1	5	5	0	1	8	13	13	8	12	8	4	5	9	11	5	4	10		Clostridia_o_f_g_unclassified	0.117855	0.089264	0.0389332	0.0312402	0.134771	0.102106	0.0130056	0.0941088	0.0812612	0	0.0301023	0.114695	0.211348	0.198807	0.140302	0.174774	0.0682536	0.0437302	0.0599233
3	0.2.27.3	Erysipelotrichia	1	6347	188	514	68	380	120	273	144	194	260	65	60	115	38	347	339	182	178	94	357	155	229	757	1140	150		Erysipelotrichia	2.76959	4.17106	1.32373	3.9571	2.31036	3.48437	1.87281	3.65142	4.22558	1.187	1.80614	1.64875	0.617786	5.30662	5.94528	2.65074	1.51864	1.02766	4.27852
4	0.2.27.3.1	Erysipelotrichales	1	6347	188	514	68	380	120	273	144	194	260	65	60	115	38	347	339	182	178	94	357	155	229	757	1140	150		Erysipelotrichales	2.76959	4.17106	1.32373	3.9571	2.31036	3.48437	1.87281	3.65142	4.22558	1.187	1.80614	1.64875	0.617786	5.30662	5.94528	2.65074	1.51864	1.02766	4.27852
5	0.2.27.3.1.1	Erysipelotrichaceae	15	6347	188	514	68	380	120	273	144	194	260	65	60	115	38	347	339	182	178	94	357	155	229	757	1140	150		Erysipelotrichaceae	2.76959	4.17106	1.32373	3.9571	2.31036	3.48437	1.87281	3.65142	4.22558	1.187	1.80614	1.64875	0.617786	5.30662	5.94528	2.65074	1.51864	1.02766	4.27852
6	0.2.27.3.1.1.1	Allobaculum	0	2488	84	342	16	178	53	106	35	86	102	10	16	15	2	85	70	41	58	27	71	73	56	331	583	48		Allobaculum	1.23748	2.7753	0.311466	1.85359	1.02041	1.3529	0.455196	1.61867	1.65773	0.182615	0.481638	0.215054	0.032515	1.29989	1.22764	0.597145	0.494838	0.295179	0.850911
6	0.2.27.3.1.1.4	Candidatus_Stoquefichus	0	43	3	1	2	1	1	0	1	2	1	0	0	5	3	2	4	1	0	0	7	2	1	1	3	2		Candidatus_Stoquefichus	0.0441956	0.00811491	0.0389332	0.0104134	0.019253	0	0.0130056	0.0376435	0.0162522	0	0	0.0716846	0.0487726	0.0305857	0.0701508	0.0145645	0	0	0.0838926
6	0.2.27.3.1.1.5	Catenibacterium	0	6	0	0	0	0	0	0	0	0	3	3	0	0	0	0	0	0	0	0	0	0	0	0	0	0		Catenibacterium	0	0	0	0	0	0	0	0	0.0487567	0.0547845	0	0	0	0	0	0	0	0	0
6	0.2.27.3.1.1.6	Coprobacillus	0	9	0	1	0	0	0	0	3	0	0	0	0	1	0	0	4	0	0	0	0	0	0	0	0	0		Coprobacillus	0	0.00811491	0	0	0	0	0.0390168	0	0	0	0	0.0143369	0	0	0.0701508	0	0	0	0
6	0.2.27.3.1.1.9	Erysipelatoclostridium	0	242	0	6	10	0	1	28	5	0	1	0	0	24	0	16	12	0	0	0	6	0	14	106	7	6		Erysipelatoclostridium	0	0.0486894	0.194666	0	0.019253	0.357371	0.065028	0	0.0162522	0	0	0.344086	0	0.244686	0.210452	0	0	0	0.071908
6	0.2.27.3.1.1.11	Erysipelotrichaceae_UCG-001	0	14	0	1	0	0	0	0	0	0	0	0	0	0	0	0	0	0	0	0	0	0	0	9	4	0		Erysipelotrichaceae_UCG-001	0	0.00811491	0	0	0	0	0	0	0	0	0	0	0	0	0	0	0	0	0
6	0.2.27.3.1.1.13	Erysipelotrichaceae_UCG-003	0	577	5	3	2	34	5	3	14	16	24	3	1	6	1	59	59	24	40	14	39	4	19	90	77	35		Erysipelotrichaceae_UCG-003	0.0736594	0.0243447	0.0389332	0.354056	0.0962649	0.0382897	0.182078	0.301148	0.390054	0.0547845	0.0301023	0.0860215	0.0162575	0.902279	1.03472	0.349548	0.341268	0.153056	0.467402
6	0.2.27.3.1.1.14	Erysipelotrichaceae_UCG-004	0	9	1	0	0	3	0	0	0	0	2	0	0	0	0	0	1	0	2	0	0	0	0	0	0	0		Erysipelotrichaceae_UCG-004	0.0147319	0	0	0.0312402	0	0	0	0	0.0325045	0	0	0	0	0	0.0175377	0	0.0170634	0	0
6	0.2.27.3.1.1.19	Faecalicoccus	0	1	0	0	0	0	0	0	0	0	1	0	0	0	0	0	0	0	0	0	0	0	0	0	0	0		Faecalicoccus	0	0	0	0	0	0	0	0	0.0162522	0	0	0	0	0	0	0	0	0	0
6	0.2.27.3.1.1.21	Holdemanella	0	126	0	0	0	1	0	0	1	0	1	0	0	1	0	12	8	11	6	4	19	1	1	53	6	1		Holdemanella	0	0	0	0.0104134	0	0	0.0130056	0	0.0162522	0	0	0.0143369	0	0.183514	0.140302	0.16021	0.0511902	0.0437302	0.227709
6	0.2.27.3.1.1.22	Holdemania	0	95	1	12	7	0	1	7	2	1	7	0	0	1	2	12	21	1	2	0	4	0	4	7	0	3		Holdemania	0.0147319	0.0973789	0.136266	0	0.019253	0.0893427	0.0260112	0.0188218	0.113766	0	0	0.0143369	0.032515	0.183514	0.368292	0.0145645	0.0170634	0	0.0479386
6	0.2.27.3.1.1.26	Solobacterium	0	11	0	0	0	0	0	0	0	0	0	0	0	8	0	0	0	0	0	0	3	0	0	0	0	0		Solobacterium	0	0	0	0	0	0	0	0	0	0	0	0.114695	0	0	0	0	0	0	0.035954
6	0.2.27.3.1.1.27	Turicibacter	0	24	0	1	0	0	1	1	0	0	1	0	0	0	0	1	1	8	1	0	2	1	0	2	4	0		Turicibacter	0	0.00811491	0	0	0.019253	0.0127632	0	0	0.0162522	0	0	0	0	0.0152929	0.0175377	0.116516	0.0085317	0	0.0239693
6	0.2.27.3.1.1.28	[Anaerorhabdus]_furcosa_group	0	35	0	0	0	4	0	2	2	1	4	0	0	2	0	3	4	1	0	1	1	1	2	2	5	0		[Anaerorhabdus]_furcosa_group	0	0	0	0.0416536	0	0.0255265	0.0260112	0.0188218	0.0650089	0	0	0.0286738	0	0.0458786	0.0701508	0.0145645	0	0.0109325	0.0119847
6	0.2.27.3.1.1.29	Erysipelotrichaceae_g_unclassified	0	2667	94	147	31	159	58	126	81	88	113	49	43	52	30	157	155	95	69	48	205	73	132	156	451	55		Erysipelotrichaceae_g_unclassified	1.3848	1.19289	0.603465	1.65573	1.11667	1.60817	1.05345	1.65631	1.8365	0.894814	1.2944	0.74552	0.487726	2.40098	2.71834	1.38363	0.588687	0.524762	2.45686
3	0.2.27.4	Negativicutes	1	8076	349	875	336	171	256	404	315	109	534	650	140	470	298	310	248	176	364	203	286	140	619	423	178	222		Negativicutes	5.14143	7.10054	6.54078	1.78069	4.92876	5.15635	4.09676	2.05157	8.67869	11.87	4.21433	6.73835	4.84474	4.74079	4.34935	2.56336	3.10554	2.21931	3.42761
4	0.2.27.4.1	Selenomonadales	3	8076	349	875	336	171	256	404	315	109	534	650	140	470	298	310	248	176	364	203	286	140	619	423	178	222		Selenomonadales	5.14143	7.10054	6.54078	1.78069	4.92876	5.15635	4.09676	2.05157	8.67869	11.87	4.21433	6.73835	4.84474	4.74079	4.34935	2.56336	3.10554	2.21931	3.42761
5	0.2.27.4.1.1	Acidaminococcaceae	2	1822	0	3	24	16	7	0	33	8	56	3	0	222	50	191	136	79	310	98	25	0	195	188	52	126		Acidaminococcaceae	0	0.0243447	0.467199	0.166615	0.134771	0	0.429185	0.150574	0.910125	0.0547845	0	3.1828	0.812876	2.92094	2.38513	1.1506	2.64483	1.07139	0.299616
6	0.2.27.4.1.1.2	Phascolarctobacterium	0	1685	0	3	20	16	7	0	30	7	51	3	0	210	47	172	128	72	288	92	24	0	176	169	49	121		Phascolarctobacterium	0	0.0243447	0.389332	0.166615	0.134771	0	0.390168	0.131752	0.828864	0.0547845	0	3.01075	0.764103	2.63037	2.24483	1.04865	2.45713	1.00579	0.287632
6	0.2.27.4.1.1.5	Acidaminococcaceae_g_unclassified	0	137	0	0	4	0	0	0	3	1	5	0	0	12	3	19	8	7	22	6	1	0	19	19	3	5		Acidaminococcaceae_g_unclassified	0	0	0.0778665	0	0	0	0.0390168	0.0188218	0.0812612	0	0	0.172043	0.0487726	0.290564	0.140302	0.101952	0.187697	0.0655953	0.0119847
5	0.2.27.4.1.2	Veillonellaceae	4	6097	349	872	310	155	248	404	281	100	475	644	140	228	243	105	97	85	28	96	261	140	412	216	120	88		Veillonellaceae	5.14143	7.0762	6.03465	1.61408	4.77474	5.15635	3.65457	1.88218	7.71981	11.7604	4.21433	3.26882	3.95058	1.60575	1.70116	1.23798	0.238887	1.04952	3.128
6	0.2.27.4.1.2.8	Anaerovibrio	0	3248	238	550	214	82	123	235	187	64	336	466	72	142	89	14	15	11	3	2	29	26	256	26	28	40		Anaerovibrio	3.50619	4.4632	4.16586	0.8539	2.36812	2.99936	2.43205	1.20459	5.46075	8.50986	2.16737	2.03584	1.44692	0.2141	0.263066	0.16021	0.0255951	0.0218651	0.347555
6	0.2.27.4.1.2.13	Megasphaera	0	2	0	2	0	0	0	0	0	0	0	0	0	0	0	0	0	0	0	0	0	0	0	0	0	0		Megasphaera	0	0.0162298	0	0	0	0	0	0	0	0	0	0	0	0	0	0	0	0	0
6	0.2.27.4.1.2.27	Veillonella	0	447	5	11	6	5	3	10	7	2	3	9	10	3	25	33	27	29	15	46	72	28	13	49	27	9		Veillonella	0.0736594	0.089264	0.1168	0.0520671	0.057759	0.127632	0.0910391	0.0376435	0.0487567	0.164354	0.301023	0.0430108	0.406438	0.504664	0.473518	0.422371	0.127975	0.502897	0.862895
6	0.2.27.4.1.2.30	Veillonellaceae_g_unclassified	0	2400	106	309	90	68	122	159	87	34	136	169	58	83	129	58	55	45	10	48	160	86	143	141	65	39		Veillonellaceae_g_unclassified	1.56158	2.50751	1.752	0.708112	2.34886	2.02936	1.13149	0.63994	2.2103	3.08619	1.74594	1.18996	2.09722	0.886986	0.964574	0.655403	0.085317	0.524762	1.91755
5	0.2.27.4.1.3	Selenomonadales_f_unclassified	1	157	0	0	2	0	1	0	1	1	3	3	0	20	5	14	15	12	26	9	0	0	12	19	6	8		Selenomonadales_f_unclassified	0	0	0.0389332	0	0.019253	0	0.0130056	0.0188218	0.0487567	0.0547845	0	0.286738	0.0812876	0.2141	0.263066	0.174774	0.221824	0.0983929	0
6	0.2.27.4.1.3.1	Selenomonadales_f_g_unclassified	0	157	0	0	2	0	1	0	1	1	3	3	0	20	5	14	15	12	26	9	0	0	12	19	6	8		Selenomonadales_f_g_unclassified	0	0	0.0389332	0	0.019253	0	0.0130056	0.0188218	0.0487567	0.0547845	0	0.286738	0.0812876	0.2141	0.263066	0.174774	0.221824	0.0983929	0
3	0.2.27.6	Firmicutes_c_unclassified	1	3776	200	271	74	137	129	208	120	87	129	150	81	118	186	143	140	149	135	125	194	149	204	254	294	99		Firmicutes_c_unclassified	2.94638	2.19914	1.44053	1.42664	2.48363	2.65475	1.56067	1.63749	2.09654	2.73923	2.43829	1.69176	3.0239	2.18688	2.45528	2.17011	1.15178	1.36657	2.32502
4	0.2.27.6.1	Firmicutes_c_o_unclassified	1	3776	200	271	74	137	129	208	120	87	129	150	81	118	186	143	140	149	135	125	194	149	204	254	294	99		Firmicutes_c_o_unclassified	2.94638	2.19914	1.44053	1.42664	2.48363	2.65475	1.56067	1.63749	2.09654	2.73923	2.43829	1.69176	3.0239	2.18688	2.45528	2.17011	1.15178	1.36657	2.32502
5	0.2.27.6.1.1	Firmicutes_c_o_f_unclassified	1	3776	200	271	74	137	129	208	120	87	129	150	81	118	186	143	140	149	135	125	194	149	204	254	294	99		Firmicutes_c_o_f_unclassified	2.94638	2.19914	1.44053	1.42664	2.48363	2.65475	1.56067	1.63749	2.09654	2.73923	2.43829	1.69176	3.0239	2.18688	2.45528	2.17011	1.15178	1.36657	2.32502
6	0.2.27.6.1.1.1	Firmicutes_c_o_f_g_unclassified	0	3776	200	271	74	137	129	208	120	87	129	150	81	118	186	143	140	149	135	125	194	149	204	254	294	99		Firmicutes_c_o_f_g_unclassified	2.94638	2.19914	1.44053	1.42664	2.48363	2.65475	1.56067	1.63749	2.09654	2.73923	2.43829	1.69176	3.0239	2.18688	2.45528	2.17011	1.15178	1.36657	2.32502
2	0.2.28	Fusobacteria	1	21	2	0	0	1	0	2	1	0	1	0	2	0	3	1	0	0	3	3	2	0	0	0	0	0		Fusobacteria	0.0294638	0	0	0.0104134	0	0.0255265	0.0130056	0	0.0162522	0	0.0602047	0	0.0487726	0.0152929	0	0	0.0255951	0.0327976	0.0239693
3	0.2.28.1	Fusobacteriia	1	21	2	0	0	1	0	2	1	0	1	0	2	0	3	1	0	0	3	3	2	0	0	0	0	0		Fusobacteriia	0.0294638	0	0	0.0104134	0	0.0255265	0.0130056	0	0.0162522	0	0.0602047	0	0.0487726	0.0152929	0	0	0.0255951	0.0327976	0.0239693
4	0.2.28.1.1	Fusobacteriales	3	21	2	0	0	1	0	2	1	0	1	0	2	0	3	1	0	0	3	3	2	0	0	0	0	0		Fusobacteriales	0.0294638	0	0	0.0104134	0	0.0255265	0.0130056	0	0.0162522	0	0.0602047	0	0.0487726	0.0152929	0	0	0.0255951	0.0327976	0.0239693
5	0.2.28.1.1.1	Fusobacteriaceae	2	15	2	0	0	0	0	2	1	0	1	0	1	0	2	1	0	0	1	3	1	0	0	0	0	0		Fusobacteriaceae	0.0294638	0	0	0	0	0.0255265	0.0130056	0	0.0162522	0	0.0301023	0	0.032515	0.0152929	0	0	0.0085317	0.0327976	0.0119847
6	0.2.28.1.1.1.2	Fusobacterium	0	5	2	0	0	0	0	0	0	0	0	0	0	0	1	1	0	0	0	1	0	0	0	0	0	0		Fusobacterium	0.0294638	0	0	0	0	0	0	0	0	0	0	0	0.0162575	0.0152929	0	0	0	0.0109325	0
6	0.2.28.1.1.1.6	Fusobacteriaceae_g_unclassified	0	10	0	0	0	0	0	2	1	0	1	0	1	0	1	0	0	0	1	2	1	0	0	0	0	0		Fusobacteriaceae_g_unclassified	0	0	0	0	0	0.0255265	0.0130056	0	0.0162522	0	0.0301023	0	0.0162575	0	0	0	0.0085317	0.0218651	0.0119847
5	0.2.28.1.1.3	Leptotrichiaceae	1	1	0	0	0	1	0	0	0	0	0	0	0	0	0	0	0	0	0	0	0	0	0	0	0	0		Leptotrichiaceae	0	0	0	0.0104134	0	0	0	0	0	0	0	0	0	0	0	0	0	0	0
6	0.2.28.1.1.3.1	Leptotrichia	0	1	0	0	0	1	0	0	0	0	0	0	0	0	0	0	0	0	0	0	0	0	0	0	0	0		Leptotrichia	0	0	0	0.0104134	0	0	0	0	0	0	0	0	0	0	0	0	0	0	0
5	0.2.28.1.1.4	Fusobacteriales_f_unclassified	1	5	0	0	0	0	0	0	0	0	0	0	1	0	1	0	0	0	2	0	1	0	0	0	0	0		Fusobacteriales_f_unclassified	0	0	0	0	0	0	0	0	0	0	0.0301023	0	0.0162575	0	0	0	0.0170634	0	0.0119847
6	0.2.28.1.1.4.1	Fusobacteriales_f_g_unclassified	0	5	0	0	0	0	0	0	0	0	0	0	1	0	1	0	0	0	2	0	1	0	0	0	0	0		Fusobacteriales_f_g_unclassified	0	0	0	0	0	0	0	0	0	0	0.0301023	0	0.0162575	0	0	0	0.0170634	0	0.0119847
2	0.2.40	Lentisphaerae	2	9	0	1	0	0	1	0	0	0	0	0	0	0	0	0	0	1	2	2	0	0	0	2	0	0		Lentisphaerae	0	0.00811491	0	0	0.019253	0	0	0	0	0	0	0	0	0	0	0.0145645	0.0170634	0.0218651	0
3	0.2.40.9	Lentisphaerae_RFP12_gut_group	1	5	0	0	0	0	1	0	0	0	0	0	0	0	0	0	0	1	1	1	0	0	0	1	0	0		Lentisphaerae_RFP12_gut_group	0	0	0	0	0.019253	0	0	0	0	0	0	0	0	0	0	0.0145645	0.0085317	0.0109325	0
4	0.2.40.9.1	Lentisphaerae_RFP12_gut_group_o_unclassified	1	5	0	0	0	0	1	0	0	0	0	0	0	0	0	0	0	1	1	1	0	0	0	1	0	0		Lentisphaerae_RFP12_gut_group_o_unclassified	0	0	0	0	0.019253	0	0	0	0	0	0	0	0	0	0	0.0145645	0.0085317	0.0109325	0
5	0.2.40.9.1.1	Lentisphaerae_RFP12_gut_group_o_f_unclassified	1	5	0	0	0	0	1	0	0	0	0	0	0	0	0	0	0	1	1	1	0	0	0	1	0	0		Lentisphaerae_RFP12_gut_group_o_f_unclassified	0	0	0	0	0.019253	0	0	0	0	0	0	0	0	0	0	0.0145645	0.0085317	0.0109325	0
6	0.2.40.9.1.1.1	Lentisphaerae_RFP12_gut_group_o_f_g_unclassified	0	5	0	0	0	0	1	0	0	0	0	0	0	0	0	0	0	1	1	1	0	0	0	1	0	0		Lentisphaerae_RFP12_gut_group_o_f_g_unclassified	0	0	0	0	0.019253	0	0	0	0	0	0	0	0	0	0	0.0145645	0.0085317	0.0109325	0
3	0.2.40.22	Lentisphaerae_c_unclassified	1	4	0	1	0	0	0	0	0	0	0	0	0	0	0	0	0	0	1	1	0	0	0	1	0	0		Lentisphaerae_c_unclassified	0	0.00811491	0	0	0	0	0	0	0	0	0	0	0	0	0	0	0.0085317	0.0109325	0
4	0.2.40.22.1	Lentisphaerae_c_o_unclassified	1	4	0	1	0	0	0	0	0	0	0	0	0	0	0	0	0	0	1	1	0	0	0	1	0	0		Lentisphaerae_c_o_unclassified	0	0.00811491	0	0	0	0	0	0	0	0	0	0	0	0	0	0	0.0085317	0.0109325	0
5	0.2.40.22.1.1	Lentisphaerae_c_o_f_unclassified	1	4	0	1	0	0	0	0	0	0	0	0	0	0	0	0	0	0	1	1	0	0	0	1	0	0		Lentisphaerae_c_o_f_unclassified	0	0.00811491	0	0	0	0	0	0	0	0	0	0	0	0	0	0	0.0085317	0.0109325	0
6	0.2.40.22.1.1.1	Lentisphaerae_c_o_f_g_unclassified	0	4	0	1	0	0	0	0	0	0	0	0	0	0	0	0	0	0	1	1	0	0	0	1	0	0		Lentisphaerae_c_o_f_g_unclassified	0	0.00811491	0	0	0	0	0	0	0	0	0	0	0	0	0	0	0.0085317	0.0109325	0
2	0.2.48	Planctomycetes	1	1	0	0	0	1	0	0	0	0	0	0	0	0	0	0	0	0	0	0	0	0	0	0	0	0		Planctomycetes	0	0	0	0.0104134	0	0	0	0	0	0	0	0	0	0	0	0	0	0	0
3	0.2.48.9	Planctomycetacia	1	1	0	0	0	1	0	0	0	0	0	0	0	0	0	0	0	0	0	0	0	0	0	0	0	0		Planctomycetacia	0	0	0	0.0104134	0	0	0	0	0	0	0	0	0	0	0	0	0	0	0
4	0.2.48.9.2	Planctomycetales	1	1	0	0	0	1	0	0	0	0	0	0	0	0	0	0	0	0	0	0	0	0	0	0	0	0		Planctomycetales	0	0	0	0.0104134	0	0	0	0	0	0	0	0	0	0	0	0	0	0	0
5	0.2.48.9.2.1	Planctomycetaceae	1	1	0	0	0	1	0	0	0	0	0	0	0	0	0	0	0	0	0	0	0	0	0	0	0	0		Planctomycetaceae	0	0	0	0.0104134	0	0	0	0	0	0	0	0	0	0	0	0	0	0	0
6	0.2.48.9.2.1.22	p-1088-a5_gut_group	0	1	0	0	0	1	0	0	0	0	0	0	0	0	0	0	0	0	0	0	0	0	0	0	0	0		p-1088-a5_gut_group	0	0	0	0.0104134	0	0	0	0	0	0	0	0	0	0	0	0	0	0	0
2	0.2.49	Proteobacteria	5	316	5	40	4	10	5	11	1	35	12	11	9	13	16	3	3	10	10	9	8	40	11	18	9	23		Proteobacteria	0.0736594	0.324596	0.0778665	0.104134	0.0962649	0.140396	0.0130056	0.658762	0.195027	0.200877	0.270921	0.18638	0.26012	0.0458786	0.0526131	0.145645	0.085317	0.0983929	0.0958773
3	0.2.49.6	Betaproteobacteria	3	29	0	5	0	3	0	2	1	2	1	1	2	0	0	2	0	1	4	0	3	1	0	1	0	0		Betaproteobacteria	0	0.0405745	0	0.0312402	0	0.0255265	0.0130056	0.0376435	0.0162522	0.0182615	0.0602047	0	0	0.0305857	0	0.0145645	0.0341268	0	0.035954
4	0.2.49.6.5	Burkholderiales	1	10	0	2	0	1	0	1	0	2	0	1	0	0	0	0	0	0	0	0	1	1	0	1	0	0		Burkholderiales	0	0.0162298	0	0.0104134	0	0.0127632	0	0.0376435	0	0.0182615	0	0	0	0	0	0	0	0	0.0119847
5	0.2.49.6.5.1	Alcaligenaceae	2	10	0	2	0	1	0	1	0	2	0	1	0	0	0	0	0	0	0	0	1	1	0	1	0	0		Alcaligenaceae	0	0.0162298	0	0.0104134	0	0.0127632	0	0.0376435	0	0.0182615	0	0	0	0	0	0	0	0	0.0119847
6	0.2.49.6.5.1.18	Parasutterella	0	9	0	2	0	1	0	0	0	2	0	1	0	0	0	0	0	0	0	0	1	1	0	1	0	0		Parasutterella	0	0.0162298	0	0.0104134	0	0	0	0.0376435	0	0.0182615	0	0	0	0	0	0	0	0	0.0119847
6	0.2.49.6.5.1.22	Sutterella	0	1	0	0	0	0	0	1	0	0	0	0	0	0	0	0	0	0	0	0	0	0	0	0	0	0		Sutterella	0	0	0	0	0	0.0127632	0	0	0	0	0	0	0	0	0	0	0	0	0
4	0.2.49.6.10	Neisseriales	1	2	0	0	0	0	0	0	0	0	0	0	0	0	0	0	0	0	0	0	2	0	0	0	0	0		Neisseriales	0	0	0	0	0	0	0	0	0	0	0	0	0	0	0	0	0	0	0.0239693
5	0.2.49.6.10.1	Neisseriaceae	1	2	0	0	0	0	0	0	0	0	0	0	0	0	0	0	0	0	0	0	2	0	0	0	0	0		Neisseriaceae	0	0	0	0	0	0	0	0	0	0	0	0	0	0	0	0	0	0	0.0239693
6	0.2.49.6.10.1.32	Neisseriaceae_g_unclassified	0	2	0	0	0	0	0	0	0	0	0	0	0	0	0	0	0	0	0	0	2	0	0	0	0	0		Neisseriaceae_g_unclassified	0	0	0	0	0	0	0	0	0	0	0	0	0	0	0	0	0	0	0.0239693
4	0.2.49.6.18	Betaproteobacteria_o_unclassified	1	17	0	3	0	2	0	1	1	0	1	0	2	0	0	2	0	1	4	0	0	0	0	0	0	0		Betaproteobacteria_o_unclassified	0	0.0243447	0	0.0208268	0	0.0127632	0.0130056	0	0.0162522	0	0.0602047	0	0	0.0305857	0	0.0145645	0.0341268	0	0
5	0.2.49.6.18.1	Betaproteobacteria_o_f_unclassified	1	17	0	3	0	2	0	1	1	0	1	0	2	0	0	2	0	1	4	0	0	0	0	0	0	0		Betaproteobacteria_o_f_unclassified	0	0.0243447	0	0.0208268	0	0.0127632	0.0130056	0	0.0162522	0	0.0602047	0	0	0.0305857	0	0.0145645	0.0341268	0	0
6	0.2.49.6.18.1.1	Betaproteobacteria_o_f_g_unclassified	0	17	0	3	0	2	0	1	1	0	1	0	2	0	0	2	0	1	4	0	0	0	0	0	0	0		Betaproteobacteria_o_f_g_unclassified	0	0.0243447	0	0.0208268	0	0.0127632	0.0130056	0	0.0162522	0	0.0602047	0	0	0.0305857	0	0.0145645	0.0341268	0	0
3	0.2.49.7	Deltaproteobacteria	2	31	0	2	0	0	1	3	0	1	1	1	0	0	4	0	0	5	0	2	0	8	1	1	0	1		Deltaproteobacteria	0	0.0162298	0	0	0.019253	0.0382897	0	0.0188218	0.0162522	0.0182615	0	0	0.0650301	0	0	0.0728226	0	0.0218651	0
4	0.2.49.7.8	Desulfovibrionales	2	30	0	2	0	0	1	3	0	0	1	1	0	0	4	0	0	5	0	2	0	8	1	1	0	1		Desulfovibrionales	0	0.0162298	0	0	0.019253	0.0382897	0	0	0.0162522	0.0182615	0	0	0.0650301	0	0	0.0728226	0	0.0218651	0
5	0.2.49.7.8.4	Desulfovibrionaceae	2	23	0	1	0	0	0	3	0	0	1	1	0	0	3	0	0	4	0	1	0	7	1	0	0	1		Desulfovibrionaceae	0	0.00811491	0	0	0	0.0382897	0	0	0.0162522	0.0182615	0	0	0.0487726	0	0	0.0582581	0	0.0109325	0
6	0.2.49.7.8.4.4	Desulfovibrio	0	19	0	1	0	0	0	3	0	0	1	1	0	0	2	0	0	3	0	1	0	5	1	0	0	1		Desulfovibrio	0	0.00811491	0	0	0	0.0382897	0	0	0.0162522	0.0182615	0	0	0.032515	0	0	0.0436936	0	0.0109325	0
6	0.2.49.7.8.4.6	Desulfovibrionaceae_g_unclassified	0	4	0	0	0	0	0	0	0	0	0	0	0	0	1	0	0	1	0	0	0	2	0	0	0	0		Desulfovibrionaceae_g_unclassified	0	0	0	0	0	0	0	0	0	0	0	0	0.0162575	0	0	0.0145645	0	0	0
5	0.2.49.7.8.5	Desulfovibrionales_f_unclassified	1	7	0	1	0	0	1	0	0	0	0	0	0	0	1	0	0	1	0	1	0	1	0	1	0	0		Desulfovibrionales_f_unclassified	0	0.00811491	0	0	0.019253	0	0	0	0	0	0	0	0.0162575	0	0	0.0145645	0	0.0109325	0
6	0.2.49.7.8.5.1	Desulfovibrionales_f_g_unclassified	0	7	0	1	0	0	1	0	0	0	0	0	0	0	1	0	0	1	0	1	0	1	0	1	0	0		Desulfovibrionales_f_g_unclassified	0	0.00811491	0	0	0.019253	0	0	0	0	0	0	0	0.0162575	0	0	0.0145645	0	0.0109325	0
4	0.2.49.7.21	Deltaproteobacteria_o_unclassified	1	1	0	0	0	0	0	0	0	1	0	0	0	0	0	0	0	0	0	0	0	0	0	0	0	0		Deltaproteobacteria_o_unclassified	0	0	0	0	0	0	0	0.0188218	0	0	0	0	0	0	0	0	0	0	0
5	0.2.49.7.21.1	Deltaproteobacteria_o_f_unclassified	1	1	0	0	0	0	0	0	0	1	0	0	0	0	0	0	0	0	0	0	0	0	0	0	0	0		Deltaproteobacteria_o_f_unclassified	0	0	0	0	0	0	0	0.0188218	0	0	0	0	0	0	0	0	0	0	0
6	0.2.49.7.21.1.1	Deltaproteobacteria_o_f_g_unclassified	0	1	0	0	0	0	0	0	0	1	0	0	0	0	0	0	0	0	0	0	0	0	0	0	0	0		Deltaproteobacteria_o_f_g_unclassified	0	0	0	0	0	0	0	0.0188218	0	0	0	0	0	0	0	0	0	0	0
3	0.2.49.9	Epsilonproteobacteria	2	64	2	5	1	2	4	2	0	0	4	4	0	11	4	0	0	1	4	0	0	2	1	5	3	9		Epsilonproteobacteria	0.0294638	0.0405745	0.0194666	0.0208268	0.0770119	0.0255265	0	0	0.0650089	0.073046	0	0.157706	0.0650301	0	0	0.0145645	0.0341268	0	0
4	0.2.49.9.3	Campylobacterales	1	61	2	4	1	2	4	2	0	0	4	4	0	9	4	0	0	1	4	0	0	2	1	5	3	9		Campylobacterales	0.0294638	0.0324596	0.0194666	0.0208268	0.0770119	0.0255265	0	0	0.0650089	0.073046	0	0.129032	0.0650301	0	0	0.0145645	0.0341268	0	0
5	0.2.49.9.3.2	Helicobacteraceae	2	61	2	4	1	2	4	2	0	0	4	4	0	9	4	0	0	1	4	0	0	2	1	5	3	9		Helicobacteraceae	0.0294638	0.0324596	0.0194666	0.0208268	0.0770119	0.0255265	0	0	0.0650089	0.073046	0	0.129032	0.0650301	0	0	0.0145645	0.0341268	0	0
6	0.2.49.9.3.2.1	Helicobacter	0	55	2	3	1	2	3	1	0	0	3	4	0	9	3	0	0	1	3	0	0	2	1	5	3	9		Helicobacter	0.0294638	0.0243447	0.0194666	0.0208268	0.057759	0.0127632	0	0	0.0487567	0.073046	0	0.129032	0.0487726	0	0	0.0145645	0.0255951	0	0
6	0.2.49.9.3.2.7	Helicobacteraceae_g_unclassified	0	6	0	1	0	0	1	1	0	0	1	0	0	0	1	0	0	0	1	0	0	0	0	0	0	0		Helicobacteraceae_g_unclassified	0	0.00811491	0	0	0.019253	0.0127632	0	0	0.0162522	0	0	0	0.0162575	0	0	0	0.0085317	0	0
4	0.2.49.9.6	Epsilonproteobacteria_o_unclassified	1	3	0	1	0	0	0	0	0	0	0	0	0	2	0	0	0	0	0	0	0	0	0	0	0	0		Epsilonproteobacteria_o_unclassified	0	0.00811491	0	0	0	0	0	0	0	0	0	0.0286738	0	0	0	0	0	0	0
5	0.2.49.9.6.1	Epsilonproteobacteria_o_f_unclassified	1	3	0	1	0	0	0	0	0	0	0	0	0	2	0	0	0	0	0	0	0	0	0	0	0	0		Epsilonproteobacteria_o_f_unclassified	0	0.00811491	0	0	0	0	0	0	0	0	0	0.0286738	0	0	0	0	0	0	0
6	0.2.49.9.6.1.1	Epsilonproteobacteria_o_f_g_unclassified	0	3	0	1	0	0	0	0	0	0	0	0	0	2	0	0	0	0	0	0	0	0	0	0	0	0		Epsilonproteobacteria_o_f_g_unclassified	0	0.00811491	0	0	0	0	0	0	0	0	0	0.0286738	0	0	0	0	0	0	0
3	0.2.49.11	Gammaproteobacteria	4	139	2	26	2	3	0	1	0	32	4	5	3	1	2	1	2	2	1	3	5	19	3	9	6	7		Gammaproteobacteria	0.0294638	0.210988	0.0389332	0.0312402	0	0.0127632	0	0.602296	0.0650089	0.0913075	0.090307	0.0143369	0.032515	0.0152929	0.0350754	0.029129	0.0085317	0.0327976	0.0599233
4	0.2.49.11.5	Aeromonadales	1	6	1	1	0	0	0	0	0	0	1	0	0	0	0	0	0	0	1	1	0	1	0	0	0	0		Aeromonadales	0.0147319	0.00811491	0	0	0	0	0	0	0.0162522	0	0	0	0	0	0	0	0.0085317	0.0109325	0
5	0.2.49.11.5.2	Succinivibrionaceae	2	6	1	1	0	0	0	0	0	0	1	0	0	0	0	0	0	0	1	1	0	1	0	0	0	0		Succinivibrionaceae	0.0147319	0.00811491	0	0	0	0	0	0	0.0162522	0	0	0	0	0	0	0	0.0085317	0.0109325	0
6	0.2.49.11.5.2.1	Anaerobiospirillum	0	3	0	1	0	0	0	0	0	0	1	0	0	0	0	0	0	0	0	1	0	0	0	0	0	0		Anaerobiospirillum	0	0.00811491	0	0	0	0	0	0	0.0162522	0	0	0	0	0	0	0	0	0.0109325	0
6	0.2.49.11.5.2.8	Succinivibrionaceae_g_unclassified	0	3	1	0	0	0	0	0	0	0	0	0	0	0	0	0	0	0	1	0	0	1	0	0	0	0		Succinivibrionaceae_g_unclassified	0.0147319	0	0	0	0	0	0	0	0	0	0	0	0	0	0	0	0.0085317	0	0
4	0.2.49.11.21	Enterobacteriales	1	67	0	23	1	3	0	0	0	32	0	3	2	0	0	0	0	0	0	1	1	0	0	1	0	0		Enterobacteriales	0	0.186643	0.0194666	0.0312402	0	0	0	0.602296	0	0.0547845	0.0602047	0	0	0	0	0	0	0.0109325	0.0119847
5	0.2.49.11.21.1	Enterobacteriaceae	2	67	0	23	1	3	0	0	0	32	0	3	2	0	0	0	0	0	0	1	1	0	0	1	0	0		Enterobacteriaceae	0	0.186643	0.0194666	0.0312402	0	0	0	0.602296	0	0.0547845	0.0602047	0	0	0	0	0	0	0.0109325	0.0119847
6	0.2.49.11.21.1.32	Escherichia-Shigella	0	2	0	0	1	0	0	0	0	0	0	0	0	0	0	0	0	0	0	1	0	0	0	0	0	0		Escherichia-Shigella	0	0	0.0194666	0	0	0	0	0	0	0	0	0	0	0	0	0	0	0.0109325	0
6	0.2.49.11.21.1.62	Enterobacteriaceae_g_unclassified	0	65	0	23	0	3	0	0	0	32	0	3	2	0	0	0	0	0	0	0	1	0	0	1	0	0		Enterobacteriaceae_g_unclassified	0	0.186643	0	0.0312402	0	0	0	0.602296	0	0.0547845	0.0602047	0	0	0	0	0	0	0	0.0119847
4	0.2.49.11.37	Pasteurellales	1	12	1	1	0	0	0	1	0	0	2	1	0	1	0	1	0	0	0	1	3	0	0	0	0	0		Pasteurellales	0.0147319	0.00811491	0	0	0	0.0127632	0	0	0.0325045	0.0182615	0	0.0143369	0	0.0152929	0	0	0	0.0109325	0.035954
5	0.2.49.11.37.1	Pasteurellaceae	2	12	1	1	0	0	0	1	0	0	2	1	0	1	0	1	0	0	0	1	3	0	0	0	0	0		Pasteurellaceae	0.0147319	0.00811491	0	0	0	0.0127632	0	0	0.0325045	0.0182615	0	0.0143369	0	0.0152929	0	0	0	0.0109325	0.035954
6	0.2.49.11.37.1.1	Actinobacillus	0	1	0	0	0	0	0	0	0	0	0	0	0	0	0	0	0	0	0	0	1	0	0	0	0	0		Actinobacillus	0	0	0	0	0	0	0	0	0	0	0	0	0	0	0	0	0	0	0.0119847
6	0.2.49.11.37.1.17	Pasteurellaceae_g_unclassified	0	11	1	1	0	0	0	1	0	0	2	1	0	1	0	1	0	0	0	1	2	0	0	0	0	0		Pasteurellaceae_g_unclassified	0.0147319	0.00811491	0	0	0	0.0127632	0	0	0.0325045	0.0182615	0	0.0143369	0	0.0152929	0	0	0	0.0109325	0.0239693
4	0.2.49.11.50	Gammaproteobacteria_o_unclassified	1	54	0	1	1	0	0	0	0	0	1	1	1	0	2	0	2	2	0	0	1	18	3	8	6	7		Gammaproteobacteria_o_unclassified	0	0.00811491	0.0194666	0	0	0	0	0	0.0162522	0.0182615	0.0301023	0	0.032515	0	0.0350754	0.029129	0	0	0.0119847
5	0.2.49.11.50.1	Gammaproteobacteria_o_f_unclassified	1	54	0	1	1	0	0	0	0	0	1	1	1	0	2	0	2	2	0	0	1	18	3	8	6	7		Gammaproteobacteria_o_f_unclassified	0	0.00811491	0.0194666	0	0	0	0	0	0.0162522	0.0182615	0.0301023	0	0.032515	0	0.0350754	0.029129	0	0	0.0119847
6	0.2.49.11.50.1.1	Gammaproteobacteria_o__f_g_unclassified	0	54	0	1	1	0	0	0	0	0	1	1	1	0	2	0	2	2	0	0	1	18	3	8	6	7		Gammaproteobacteria_o__f_g_unclassified	0	0.00811491	0.0194666	0	0	0	0	0	0.0162522	0.0182615	0.0301023	0	0.032515	0	0.0350754	0.029129	0	0	0.0119847
3	0.2.49.22	Proteobacteria_c_unclassified	1	53	1	2	1	2	0	3	0	0	2	0	4	1	6	0	1	1	1	4	0	10	6	2	0	6		Proteobacteria_c_unclassified	0.0147319	0.0162298	0.0194666	0.0208268	0	0.0382897	0	0	0.0325045	0	0.120409	0.0143369	0.0975451	0	0.0175377	0.0145645	0.0085317	0.0437302	0
4	0.2.49.22.1	Proteobacteria_c_o_unclassified	1	53	1	2	1	2	0	3	0	0	2	0	4	1	6	0	1	1	1	4	0	10	6	2	0	6		Proteobacteria_c_o_unclassified	0.0147319	0.0162298	0.0194666	0.0208268	0	0.0382897	0	0	0.0325045	0	0.120409	0.0143369	0.0975451	0	0.0175377	0.0145645	0.0085317	0.0437302	0
5	0.2.49.22.1.1	Proteobacteria_c_o_f_unclassified	1	53	1	2	1	2	0	3	0	0	2	0	4	1	6	0	1	1	1	4	0	10	6	2	0	6		Proteobacteria_c_o_f_unclassified	0.0147319	0.0162298	0.0194666	0.0208268	0	0.0382897	0	0	0.0325045	0	0.120409	0.0143369	0.0975451	0	0.0175377	0.0145645	0.0085317	0.0437302	0
6	0.2.49.22.1.1.1	Proteobacteria_o_f_g_unclassified	0	53	1	2	1	2	0	3	0	0	2	0	4	1	6	0	1	1	1	4	0	10	6	2	0	6		Proteobacteria_o_f_g_unclassified	0.0147319	0.0162298	0.0194666	0.0208268	0	0.0382897	0	0	0.0325045	0	0.120409	0.0143369	0.0975451	0	0.0175377	0.0145645	0.0085317	0.0437302	0
2	0.2.54	Saccharibacteria	1	1	1	0	0	0	0	0	0	0	0	0	0	0	0	0	0	0	0	0	0	0	0	0	0	0		Saccharibacteria	0.0147319	0	0	0	0	0	0	0	0	0	0	0	0	0	0	0	0	0	0
3	0.2.54.1	Saccharibacteria_Unknown_Class	1	1	1	0	0	0	0	0	0	0	0	0	0	0	0	0	0	0	0	0	0	0	0	0	0	0		Saccharibacteria_Unknown_Class	0.0147319	0	0	0	0	0	0	0	0	0	0	0	0	0	0	0	0	0	0
4	0.2.54.1.1	Saccharibacteria_Unknown_Order	1	1	1	0	0	0	0	0	0	0	0	0	0	0	0	0	0	0	0	0	0	0	0	0	0	0		Saccharibacteria_Unknown_Order	0.0147319	0	0	0	0	0	0	0	0	0	0	0	0	0	0	0	0	0	0
5	0.2.54.1.1.1	Saccharibacteria_Unknown_Family	1	1	1	0	0	0	0	0	0	0	0	0	0	0	0	0	0	0	0	0	0	0	0	0	0	0		Saccharibacteria_Unknown_Family	0.0147319	0	0	0	0	0	0	0	0	0	0	0	0	0	0	0	0	0	0
6	0.2.54.1.1.1.1	Candidatus_Saccharimonas	0	1	1	0	0	0	0	0	0	0	0	0	0	0	0	0	0	0	0	0	0	0	0	0	0	0		Candidatus_Saccharimonas	0.0147319	0	0	0	0	0	0	0	0	0	0	0	0	0	0	0	0	0	0
2	0.2.55	Spirochaetae	1	72	1	0	0	11	0	0	0	0	4	0	0	0	10	2	0	2	1	3	1	21	9	1	5	1		Spirochaetae	0.0147319	0	0	0.114548	0	0	0	0	0.0650089	0	0	0	0.162575	0.0305857	0	0.029129	0.0085317	0.0327976	0.0119847
3	0.2.55.1	Spirochaetes	1	72	1	0	0	11	0	0	0	0	4	0	0	0	10	2	0	2	1	3	1	21	9	1	5	1		Spirochaetes	0.0147319	0	0	0.114548	0	0	0	0	0.0650089	0	0	0	0.162575	0.0305857	0	0.029129	0.0085317	0.0327976	0.0119847
4	0.2.55.1.1	Spirochaetales	2	72	1	0	0	11	0	0	0	0	4	0	0	0	10	2	0	2	1	3	1	21	9	1	5	1		Spirochaetales	0.0147319	0	0	0.114548	0	0	0	0	0.0650089	0	0	0	0.162575	0.0305857	0	0.029129	0.0085317	0.0327976	0.0119847
5	0.2.55.1.1.6	Spirochaetaceae	2	71	1	0	0	11	0	0	0	0	4	0	0	0	10	2	0	2	1	3	1	21	8	1	5	1		Spirochaetaceae	0.0147319	0	0	0.114548	0	0	0	0	0.0650089	0	0	0	0.162575	0.0305857	0	0.029129	0.0085317	0.0327976	0.0119847
6	0.2.55.1.1.6.8	Treponema_2	0	65	1	0	0	10	0	0	0	0	4	0	0	0	10	2	0	2	0	3	1	19	7	1	5	0		Treponema_2	0.0147319	0	0	0.104134	0	0	0	0	0.0650089	0	0	0	0.162575	0.0305857	0	0.029129	0	0.0327976	0.0119847
6	0.2.55.1.1.6.9	Spirochaetaceae_g_unclassified	0	6	0	0	0	1	0	0	0	0	0	0	0	0	0	0	0	0	1	0	0	2	1	0	0	1		Spirochaetaceae_g_unclassified	0	0	0	0.0104134	0	0	0	0	0	0	0	0	0	0	0	0	0.0085317	0	0
5	0.2.55.1.1.9	Spirochaetales_f_unclassified	1	1	0	0	0	0	0	0	0	0	0	0	0	0	0	0	0	0	0	0	0	0	1	0	0	0		Spirochaetales_f_unclassified	0	0	0	0	0	0	0	0	0	0	0	0	0	0	0	0	0	0	0
6	0.2.55.1.1.9.1	Spirochaetales_f_g_unclassified	0	1	0	0	0	0	0	0	0	0	0	0	0	0	0	0	0	0	0	0	0	0	1	0	0	0		Spirochaetales_f_g_unclassified	0	0	0	0	0	0	0	0	0	0	0	0	0	0	0	0	0	0	0
2	0.2.59	Tenericutes	1	8212	92	36	42	396	146	89	43	107	175	21	19	43	259	1013	818	638	161	1138	1143	315	210	72	1097	139		Tenericutes	1.35533	0.292137	0.817598	4.12371	2.81094	1.13593	0.55924	2.01393	2.84414	0.383492	0.571945	0.616487	4.2107	15.4917	14.3458	9.29216	1.3736	12.4412	13.6985
3	0.2.59.1	Mollicutes	4	8212	92	36	42	396	146	89	43	107	175	21	19	43	259	1013	818	638	161	1138	1143	315	210	72	1097	139		Mollicutes	1.35533	0.292137	0.817598	4.12371	2.81094	1.13593	0.55924	2.01393	2.84414	0.383492	0.571945	0.616487	4.2107	15.4917	14.3458	9.29216	1.3736	12.4412	13.6985
4	0.2.59.1.2	Anaeroplasmatales	1	29	1	4	0	0	0	3	0	0	5	0	1	0	8	0	1	0	3	0	0	0	3	0	0	0		Anaeroplasmatales	0.0147319	0.0324596	0	0	0	0.0382897	0	0	0.0812612	0	0.0301023	0	0.13006	0	0.0175377	0	0.0255951	0	0
5	0.2.59.1.2.1	Anaeroplasmataceae	1	29	1	4	0	0	0	3	0	0	5	0	1	0	8	0	1	0	3	0	0	0	3	0	0	0		Anaeroplasmataceae	0.0147319	0.0324596	0	0	0	0.0382897	0	0	0.0812612	0	0.0301023	0	0.13006	0	0.0175377	0	0.0255951	0	0
6	0.2.59.1.2.1.1	Anaeroplasma	0	29	1	4	0	0	0	3	0	0	5	0	1	0	8	0	1	0	3	0	0	0	3	0	0	0		Anaeroplasma	0.0147319	0.0324596	0	0	0	0.0382897	0	0	0.0812612	0	0.0301023	0	0.13006	0	0.0175377	0	0.0255951	0	0
4	0.2.59.1.9	Mollicutes_RF9	1	7913	84	29	40	384	140	78	42	98	164	19	16	41	241	983	785	629	150	1113	1104	301	199	68	1074	131		Mollicutes_RF9	1.23748	0.235332	0.778665	3.99875	2.69542	0.995533	0.546235	1.84453	2.66537	0.346969	0.481638	0.587814	3.91806	15.0329	13.7671	9.16108	1.27975	12.1679	13.2311
5	0.2.59.1.9.1	Anaeroplasmatales_f_unclassified	1	7913	84	29	40	384	140	78	42	98	164	19	16	41	241	983	785	629	150	1113	1104	301	199	68	1074	131		Anaeroplasmatales_f_unclassified	1.23748	0.235332	0.778665	3.99875	2.69542	0.995533	0.546235	1.84453	2.66537	0.346969	0.481638	0.587814	3.91806	15.0329	13.7671	9.16108	1.27975	12.1679	13.2311
6	0.2.59.1.9.1.1	Anaeroplasmatales_f_g_unclassified	0	7913	84	29	40	384	140	78	42	98	164	19	16	41	241	983	785	629	150	1113	1104	301	199	68	1074	131		Anaeroplasmatales_f_g_unclassified	1.23748	0.235332	0.778665	3.99875	2.69542	0.995533	0.546235	1.84453	2.66537	0.346969	0.481638	0.587814	3.91806	15.0329	13.7671	9.16108	1.27975	12.1679	13.2311
4	0.2.59.1.10	Mycoplasmatales	1	19	0	3	2	0	1	2	1	0	2	0	1	1	1	2	0	0	0	0	1	1	0	0	0	1		Mycoplasmatales	0	0.0243447	0.0389332	0	0.019253	0.0255265	0.0130056	0	0.0325045	0	0.0301023	0.0143369	0.0162575	0.0305857	0	0	0	0	0.0119847
5	0.2.59.1.10.1	Mycoplasmataceae	2	19	0	3	2	0	1	2	1	0	2	0	1	1	1	2	0	0	0	0	1	1	0	0	0	1		Mycoplasmataceae	0	0.0243447	0.0389332	0	0.019253	0.0255265	0.0130056	0	0.0325045	0	0.0301023	0.0143369	0.0162575	0.0305857	0	0	0	0	0.0119847
6	0.2.59.1.10.1.2	Mycoplasma	0	6	0	2	0	0	0	0	0	0	2	0	0	1	0	1	0	0	0	0	0	0	0	0	0	0		Mycoplasma	0	0.0162298	0	0	0	0	0	0	0.0325045	0	0	0.0143369	0	0.0152929	0	0	0	0	0
6	0.2.59.1.10.1.4	Mycoplasmataceae_g_unclassified	0	13	0	1	2	0	1	2	1	0	0	0	1	0	1	1	0	0	0	0	1	1	0	0	0	1		Mycoplasmataceae_g_unclassified	0	0.00811491	0.0389332	0	0.019253	0.0255265	0.0130056	0	0	0	0.0301023	0	0.0162575	0.0152929	0	0	0	0	0.0119847
4	0.2.59.1.12	Mollicutes_o_unclassified	1	251	7	0	0	12	5	6	0	9	4	2	1	1	9	28	32	9	8	25	38	13	8	4	23	7		Mollicutes_o_unclassified	0.103123	0	0	0.124961	0.0962649	0.0765795	0	0.169396	0.0650089	0.036523	0.0301023	0.0143369	0.146318	0.4282	0.561207	0.131081	0.0682536	0.273314	0.455417
5	0.2.59.1.12.1	Mollicutes_o_f_unclassified	1	251	7	0	0	12	5	6	0	9	4	2	1	1	9	28	32	9	8	25	38	13	8	4	23	7		Mollicutes_o_f_unclassified	0.103123	0	0	0.124961	0.0962649	0.0765795	0	0.169396	0.0650089	0.036523	0.0301023	0.0143369	0.146318	0.4282	0.561207	0.131081	0.0682536	0.273314	0.455417
6	0.2.59.1.12.1.1	Mollicutes_o_f_g_unclassified	0	251	7	0	0	12	5	6	0	9	4	2	1	1	9	28	32	9	8	25	38	13	8	4	23	7		Mollicutes_o_f_g_unclassified	0.103123	0	0	0.124961	0.0962649	0.0765795	0	0.169396	0.0650089	0.036523	0.0301023	0.0143369	0.146318	0.4282	0.561207	0.131081	0.0682536	0.273314	0.455417
2	0.2.62	Verrucomicrobia	2	16	0	0	0	0	0	0	0	0	0	0	0	0	0	4	0	1	1	6	0	0	1	1	2	0		Verrucomicrobia	0	0	0	0	0	0	0	0	0	0	0	0	0	0.0611714	0	0.0145645	0.0085317	0.0655953	0
3	0.2.62.9	Verrucomicrobiae	1	15	0	0	0	0	0	0	0	0	0	0	0	0	0	4	0	1	1	6	0	0	1	1	1	0		Verrucomicrobiae	0	0	0	0	0	0	0	0	0	0	0	0	0	0.0611714	0	0.0145645	0.0085317	0.0655953	0
4	0.2.62.9.1	Verrucomicrobiales	1	15	0	0	0	0	0	0	0	0	0	0	0	0	0	4	0	1	1	6	0	0	1	1	1	0		Verrucomicrobiales	0	0	0	0	0	0	0	0	0	0	0	0	0	0.0611714	0	0.0145645	0.0085317	0.0655953	0
5	0.2.62.9.1.5	Verrucomicrobiaceae	1	15	0	0	0	0	0	0	0	0	0	0	0	0	0	4	0	1	1	6	0	0	1	1	1	0		Verrucomicrobiaceae	0	0	0	0	0	0	0	0	0	0	0	0	0	0.0611714	0	0.0145645	0.0085317	0.0655953	0
6	0.2.62.9.1.5.1	Akkermansia	0	15	0	0	0	0	0	0	0	0	0	0	0	0	0	4	0	1	1	6	0	0	1	1	1	0		Akkermansia	0	0	0	0	0	0	0	0	0	0	0	0	0	0.0611714	0	0.0145645	0.0085317	0.0655953	0
3	0.2.62.10	Verrucomicrobiaceae_c_unclassified	1	1	0	0	0	0	0	0	0	0	0	0	0	0	0	0	0	0	0	0	0	0	0	0	1	0		Verrucomicrobiaceae_c_unclassified	0	0	0	0	0	0	0	0	0	0	0	0	0	0	0	0	0	0	0
4	0.2.62.10.1	Verrucomicrobiaceae_c_o_unclassified	1	1	0	0	0	0	0	0	0	0	0	0	0	0	0	0	0	0	0	0	0	0	0	0	1	0		Verrucomicrobiaceae_c_o_unclassified	0	0	0	0	0	0	0	0	0	0	0	0	0	0	0	0	0	0	0
5	0.2.62.10.1.1	Verrucomicrobiaceae_c_o_f_unclassified	1	1	0	0	0	0	0	0	0	0	0	0	0	0	0	0	0	0	0	0	0	0	0	0	1	0		Verrucomicrobiaceae_c_o_f_unclassified	0	0	0	0	0	0	0	0	0	0	0	0	0	0	0	0	0	0	0
6	0.2.62.10.1.1.1	Verrucomicrobiaceae_c_o_f_g_unclassified	0	1	0	0	0	0	0	0	0	0	0	0	0	0	0	0	0	0	0	0	0	0	0	0	1	0		Verrucomicrobiaceae_c_o_f_g_unclassified	0	0	0	0	0	0	0	0	0	0	0	0	0	0	0	0	0	0	0
2	0.2.65	Bacteria_unclassified_phylum	1	28446	934	1451	540	1380	818	1055	938	646	904	662	612	747	1230	1219	1112	1333	1876	2192	1720	2006	1224	1111	2049	687		Bacteria_unclassified_phylum	13.7596	11.7747	10.512	14.3705	15.7489	13.4652	12.1992	12.1589	14.692	12.0891	18.4226	10.7097	19.9967	18.642	19.5019	19.4145	16.0055	23.9641	20.6136
3	0.2.65.1	Bacteria_unclassified_phylum_c_unclassified	1	28446	934	1451	540	1380	818	1055	938	646	904	662	612	747	1230	1219	1112	1333	1876	2192	1720	2006	1224	1111	2049	687		Bacteria_unclassified_phylum_c_unclassified	13.7596	11.7747	10.512	14.3705	15.7489	13.4652	12.1992	12.1589	14.692	12.0891	18.4226	10.7097	19.9967	18.642	19.5019	19.4145	16.0055	23.9641	20.6136
4	0.2.65.1.1	Bacteria_unclassified_phylum_c_o_unclassified	1	28446	934	1451	540	1380	818	1055	938	646	904	662	612	747	1230	1219	1112	1333	1876	2192	1720	2006	1224	1111	2049	687		Bacteria_unclassified_phylum_c_o_unclassified	13.7596	11.7747	10.512	14.3705	15.7489	13.4652	12.1992	12.1589	14.692	12.0891	18.4226	10.7097	19.9967	18.642	19.5019	19.4145	16.0055	23.9641	20.6136
5	0.2.65.1.1.1	Bacteria_unclassified_phylum_c_o_f_unclassified	1	28446	934	1451	540	1380	818	1055	938	646	904	662	612	747	1230	1219	1112	1333	1876	2192	1720	2006	1224	1111	2049	687		Bacteria_unclassified_phylum_c_o_f_unclassified	13.7596	11.7747	10.512	14.3705	15.7489	13.4652	12.1992	12.1589	14.692	12.0891	18.4226	10.7097	19.9967	18.642	19.5019	19.4145	16.0055	23.9641	20.6136
6	0.2.65.1.1.1.1	Bacteria_unclassified_phylum_c_o_f_g_unclassified	0	28446	934	1451	540	1380	818	1055	938	646	904	662	612	747	1230	1219	1112	1333	1876	2192	1720	2006	1224	1111	2049	687		Bacteria_unclassified_phylum_c_o_f_g_unclassified	13.7596	11.7747	10.512	14.3705	15.7489	13.4652	12.1992	12.1589	14.692	12.0891	18.4226	10.7097	19.9967	18.642	19.5019	19.4145	16.0055	23.9641	20.6136
																														## Some calculations
																														B/F Ratio	7.32506	13.5913	7.57333	16.8531	11.2222	5.89233	20.5455	10.6989	8.52584	17	13.1769	32.5082	15.7415	10.0202	9.68539	9.29104	109.07	34.2784	12.1372
																														Prevotellaceae/Bacteroidaceae Ratio	9.66667	12	3.26667	10.1429	13	27.5	23	15.3333	42.1667	14	46.3333	8.5	20.4	4.75	2.42857	2.22222	9.21053	17.4286	1.71429
																														Mean glucuronidase activity (per cage)	12.3462	12.7969	11.1881	9.34141	18.7888	8.15824	19.7577	7.96183	9.58506	7.96183	13.4738	18.2453	19.4966	19.1901	24.8608	24.4099	10.9702	14.6559	21.2808
																														Shannon Evenness (genera)	0.577969	0.545785	0.575575	0.530278	0.610566	0.599574	0.546308	0.556511	0.621259	0.576575	0.632219	0.560274	0.600316	0.635417	0.64502	0.621493	0.568772	0.570152	0.596333
																														Shannon H (genera)	2.58116	2.47382	2.44533	2.37423	2.65218	2.6845	2.40743	2.38769	2.85476	2.48936	2.62932	2.49566	2.75852	2.82294	2.8265	2.78263	2.59012	2.5592	2.67672
																														Richness (genera)	87	93	70	88	77	88	82	73	99	75	64	86	99	85	80	88	95	89	89
																														95 percentile	3.46199	5.09941	7.62215	3.68895	6.16481	3.52712	5.96567	5.95897	4.24671	9.03579	8.86665	2.85663	3.71322	6.28842	6.89056	6.99461	5.76743	7.2286	7.13806
																														90 percentile	2.24219	1.59052	2.88106	1.37561	2.35657	2.54754	1.35778	1.80689	2.11929	2.64427	3.0584	1.80645	1.99317	2.31534	2.26587	1.93999	1.32071	1.34033	1.99904
																														Median	0.0589275	0.0324596	0.126533	0.0520671	0.0962649	0.0765795	0.065028	0.131752	0.0650089	0.073046	0.120409	0.0860215	0.0650301	0.10705	0.140302	0.109234	0.0426585	0.0655953	0.0599233
																														CoeffVar (genera)	3.41177	3.69043	3.32909	3.70829	3.0154	3.29685	3.65347	3.55991	3.12832	3.08668	2.68814	3.78875	3.22644	2.8151	2.73565	2.94507	3.23492	3.26794	3.05967
																														SD (genera)	3.92157	3.9682	4.75584	4.21397	3.91611	3.74642	4.45546	4.87659	3.15992	4.11557	4.20022	4.40553	3.25903	3.31188	3.41956	3.34667	3.40518	3.67184	3.43783
																														Mean Genera	1.14943	1.07527	1.42857	1.13636	1.2987	1.13636	1.21951	1.36986	1.0101	1.33333	1.5625	1.16279	1.0101	1.17647	1.25	1.13636	1.05263	1.1236	1.1236
[truncated: 5 more columns]

## Sheet: Wk4_to_Wk0_Abundance_Ratio
##These data are calculated as relative abundance of week 4/week 0 for each cage, at all taxa at all taxonomic level. Only taxa that has NO ZERO values at any week 0 sample were icluded
	Untreated			Pom			BaP			PomBap
taxon	Wk04/Wk01_C01_U	Wk04/Wk01_C02_U	Wk04/Wk01_C03_U	Wk04/Wk01_C04_P	Wk04/Wk01_C05_P	Wk04/Wk01_C06_P	Wk04/Wk01_C07_B	Wk04/Wk01_C08_B	Wk04/Wk01_C09_B	Wk04/Wk01_C10_PB	Wk04/Wk01_C11_PB	Wk04/Wk01_C12_PB
Actinobacteria	0.148947	0.434355	0.634733	3.92598	0.32312	0.915234	0.470283	1.00056	0.912082	3.49038	3.50751	0.733573
Coriobacteriia	0.137043	0.452289	0.58664	3.98478	0.316526	0.962806	0.46075	1.11676	1.05729	3.33343	3.63742	0.668308
Coriobacteriales	0.137043	0.452289	0.58664	3.98478	0.316526	0.962806	0.46075	1.11676	1.05729	3.33343	3.63742	0.668308
Coriobacteriaceae	0.137043	0.452289	0.58664	3.98478	0.316526	0.962806	0.46075	1.11676	1.05729	3.33343	3.63742	0.668308
Enterorhabdus	0.183927	0.547124	0.100101	6.29384	0.110784	0	0.1455	1.2891	0.366375	1.56559	1.55889	1.48752
Coriobacteriaceae_g_unclassified	0.114443	0.279989	0.39848	3.38002	0.290331	1.00083	0.465138	1.44455	0.600644	4.66514	3.89723	0.396673
Actinobacteria_class12	0.367853	0.342643	2.70274	3.14692	0.354509	0.856565	0.64505	0.401451	0.083961	4.6256	1.94862	2.47921
Actinobacteria_class12_o_unclassified	0.367853	0.342643	2.70274	3.14692	0.354509	0.856565	0.64505	0.401451	0.083961	4.6256	1.94862	2.47921
Actinobacteria_class12_f_unclassified	0.367853	0.342643	2.70274	3.14692	0.354509	0.856565	0.64505	0.401451	0.083961	4.6256	1.94862	2.47921
Actinobacteria_class12_o_f_g_unclassified	0.367853	0.342643	2.70274	3.14692	0.354509	0.856565	0.64505	0.401451	0.083961	4.6256	1.94862	2.47921
Bacteroidetes	0.875453	0.586147	0.56743	0.718935	1.1878	0.857954	0.614907	0.754737	0.804085	0.797277	0.512481	0.853032
Bacteroidia	0.786946	0.570741	0.546892	0.722529	1.09108	0.788505	0.55922	0.697643	0.731314	0.717151	0.454336	0.846156
Bacteroidales	0.783648	0.56623	0.54502	0.723531	1.08713	0.776374	0.555653	0.696087	0.728044	0.713248	0.44746	0.843648
Bacteroidaceae	1.83927	1.25636	0.420426	1.79824	3.36784	2.99798	1.2901	2.72987	1.17545	2.84652	0.129908	1.8594
Bacteroides	1.83927	1.25636	0.420426	1.79824	3.36784	2.99798	1.2901	2.72987	1.17545	2.84652	0.129908	1.8594
Bacteroidales_S24-7_group	0.67071	0.52715	0.499419	0.599413	0.729489	0.611832	0.503472	0.585415	0.712726	0.840169	0.57272	0.718711
Bacteroidales_S24-7_group_g_unclassified	0.67071	0.52715	0.499419	0.599413	0.729489	0.611832	0.503472	0.585415	0.712726	0.840169	0.57272	0.718711
Porphyromonadaceae	3.31068	1.3461	1.35137	1.99804	2.95424	1.04691	0.263286	4.77726	0.671688	0.266862	0.129908	1.11564
Butyricimonas	1.83927	1.25636	0	0.699315	1.55098	0.685252	0	4.43603	0	0.101662	0	0.800974
Prevotellaceae	1.45944	0.567408	0.598126	1.28616	1.99456	1.55739	0.452035	1.58012	0.503766	0.265273	0.0758008	1.37165
Alloprevotella	3.88149	0.497309	0.312561	0.393981	2.38612	1.90002	0.0961566	0.311561	0.175223	0.711631	0.0280376	0.61251
Prevotella_9	0.79559	1.34202	1.17812	1.76494	4.11856	0.0619204	0.556078	0.255925	0.4073	0.533723	0.0206933	0.488441
Prevotellaceae_NK3B31_group	1.7657	3.76908	0.800811	14.6856	2.86334	0.951739	0.9215	2.59337	0.549563	3.55815	0.0835121	0.297505
Prevotellaceae_UCG-001	1.3488	0.13461	0.257403	2.49756	1.32941	0.734199	0.0757398	0.20999	0.0203542	0.383186	0.00847224	0.40083
Prevotellaceae_UCG-003	1.03096	0.325879	0.421946	0.827952	1.49538	2.14545	0.49874	2.42307	0.945721	0.0727391	0.244032	0.233119
Prevotellaceae_g_unclassified	3.17274	1.40799	1.06471	3.34117	3.06953	1.76255	1.05746	2.95735	0.695924	0.597354	0.0525469	0.552509
Bacteroidales_f_unclassified	0.772638	0.669559	0.646306	0.795255	1.16116	0.827791	0.778493	0.693998	1.01447	1.05858	0.707937	0.856394
Bacteroidales_f_g_unclassified	0.772638	0.669559	0.646306	0.795255	1.16116	0.827791	0.778493	0.693998	1.01447	1.05858	0.707937	0.856394
Bacteroidia_o_unclassified	1.14035	1.287	0.810821	0.635741	1.56153	2.68142	1.02991	0.899615	1.14492	1.64223	1.42898	1.21206
Bacteroidia_o_f_unclassified	1.14035	1.287	0.810821	0.635741	1.56153	2.68142	1.02991	0.899615	1.14492	1.64223	1.42898	1.21206
Bacteroidia_o_f_g_unclassified	1.14035	1.287	0.810821	0.635741	1.56153	2.68142	1.02991	0.899615	1.14492	1.64223	1.42898	1.21206
Bacteroidetes_c_unclassified	1.32775	0.663185	0.680032	0.7073	1.67525	1.21377	0.91491	1.02148	1.19815	1.37516	0.821807	0.889345
Bacteroidetes_c_o_unclassified	1.32775	0.663185	0.680032	0.7073	1.67525	1.21377	0.91491	1.02148	1.19815	1.37516	0.821807	0.889345
Bacteroidetes_c_o_f_unclassified	1.32775	0.663185	0.680032	0.7073	1.67525	1.21377	0.91491	1.02148	1.19815	1.37516	0.821807	0.889345
Bacteroidetes_c_o_f_g_unclassified	1.32775	0.663185	0.680032	0.7073	1.67525	1.21377	0.91491	1.02148	1.19815	1.37516	0.821807	0.889345
Firmicutes	0.986682	1.26178	1.29424	1.44457	0.588777	0.504181	1.39803	1.01958	1.17628	1.40484	1.59265	1.18375
Bacilli	0.366193	0.774147	0.427633	1.31061	0.112261	0.135541	0.946632	0.441447	0.548171	1.9433	0.950325	1.40217
Lactobacillales	0.367853	0.77262	0.423231	1.30235	0.114358	0.133883	0.978819	0.446949	0.555434	1.95494	0.913414	1.38581
Lactobacillaceae	0.117509	0.775409	0.290617	0.871455	0.0838366	0.083357	0.435434	0.244988	0.568157	1.95125	1.03666	1.21977
Lactobacillus	0.121444	0.781883	0.283983	0.871455	0.0886273	0.0807536	0.445219	0.244988	0.570154	2.01428	1.03926	1.19002
Streptococcaceae	2.34507	0.902455	0.900912	4.1421	0.147712	0.304879	4.6075	1.74711	0.503766	2.13489	0.890796	1.2644
Streptococcus	2.34507	0.902455	0.900912	4.1421	0.147712	0.304879	4.6075	1.71982	0.503766	2.11265	0.890796	1.2644
Lactobacillales_f_unclassified	0.309989	0.723358	0.500507	1.15387	0.123567	0.154758	0.781879	0.368411	0.556609	1.88582	0.813633	1.61412
Lactobacillales_f_g_unclassified	0.309989	0.723358	0.500507	1.15387	0.123567	0.154758	0.781879	0.368411	0.556609	1.88582	0.813633	1.61412
Bacilli_o_unclassified	0.324577	0.80766	0.573308	1.53849	0.055392	0.190348	0.335091	0.341233	0.414866	1.69012	3.31265	1.78503
Bacilli_o_f_unclassified	0.324577	0.80766	0.573308	1.53849	0.055392	0.190348	0.335091	0.341233	0.414866	1.69012	3.31265	1.78503
Bacilli_o_f_g_unclassified	0.324577	0.80766	0.573308	1.53849	0.055392	0.190348	0.335091	0.341233	0.414866	1.69012	3.31265	1.78503
Clostridia	1.79198	2.83947	2.44431	2.1515	0.843145	0.939342	1.74344	2.01219	1.78155	1.91651	1.15873	1.37414
Clostridiales	1.79196	2.85267	2.43499	2.12875	0.848979	0.945133	1.73623	2.02806	1.77581	1.89768	1.15694	1.36699
Family_XIII	1.79928	1.25636	0.810821	1.99127	0.390561	0.698777	1.67235	4.99053	1.55928	2.84652	1.97027	1.15976
Family_XIII_UCG-001	0.55178	0.595118	0.112614	0.381445	0	0.164023	0.201578	5.45973	0.55974	0.711631	1.78159	0.396673
Family_XIII_g_unclassified	2.90939	1.50763	1.17119	1.84365	1.41804	2.56969	2.7645	5.1185	2.21657	4.41211	2.14348	2.16367
Lachnospiraceae	1.75973	0.80407	0.528796	0.927663	0.158691	0.598336	0.540881	5.23224	1.68402	0.724116	0.39694	1.00967
Lachnospiraceae_NK4A136_group	1.41886	1.25636	0	0.582763	0.110784	0.513939	0.7372	6.82466	1.15147	0.304985	0.111349	2.23129
Lachnospiraceae_g_unclassified	1.95543	0.69583	0.545289	0.839179	0.164803	0.642424	0.502637	5.28013	1.83515	0.680003	0.398384	1.05596
Peptostreptococcaceae	1.70847	3.30641	2.77116	4.14344	3.35761	0.61422	2.08235	0.851166	1.87653	2.48203	0.906992	1.06514
Romboutsia	1.993	3.18623	2.24309	5.88248	2.9247	0.542491	1.82157	0.888793	1.61625	2.95327	0.790909	0.96488
Peptostreptococcaceae_g_unclassified	1.42814	3.44601	3.63368	2.98798	3.94794	0.715484	2.41216	0.815992	2.23546	1.99934	1.09494	1.11564
Ruminococcaceae	1.77238	4.17597	5.8259	1.01244	0.900922	2.81177	2.29857	1.87438	1.5113	1.5203	1.353	1.7758
Anaerotruncus	0.588566	2.05586	3.60365	0.372968	0.561306	2.05576	1.38225	0.930636	3.19052	1.30466	0.389723	1.2935
Oscillibacter	4.41424	0	0.450456	1.39863	0.886273	0	0	1.36493	0.251883	0	0.194862	2.97505
[Eubacterium]_coprostanoligenes_group	1.93123	3.1409	3.60365	0	3.54509	1.92727	2.7645	0	1.00753	0.355815	1.94862	1.98337
Ruminococcaceae_g_unclassified	1.87186	1.64025	2.25228	0.60966	0.676681	1.25058	1.10892	1.76638	1.5516	1.13214	0.492885	1.35897
Clostridiales_f_unclassified	1.9571	3.12127	2.56197	3.61165	1.95342	0.734199	2.15387	1.97915	2.31602	3.5318	1.83986	2.00173
Clostridiales_f_g_unclassified	1.9571	3.12127	2.56197	3.61165	1.95342	0.734199	2.15387	1.97915	2.31602	3.5318	1.83986	2.00173
Erysipelotrichia	0.22306	1.27225	4.49131	0.669871	0.657319	0.294934	2.28455	0.545269	0.887403	8.28776	7.40474	1.94025
Erysipelotrichales	0.22306	1.27225	4.49131	0.669871	0.657319	0.294934	2.28455	0.545269	0.887403	8.28776	7.40474	1.94025
Erysipelotrichaceae	0.22306	1.27225	4.49131	0.669871	0.657319	0.294934	2.28455	0.545269	0.887403	8.28776	7.40474	1.94025
Allobaculum	0.0262752	0.46838	3.94149	0.322157	0.484942	0.218182	1.86933	0.579303	0.553155	23.555	14.2005	4.76008
Erysipelotrichaceae_UCG-003	0.220712	37.0626	26.5769	0.987269	3.54509	3.9973	2.56704	0.170617	0.79763	21.3489	30.0087	8.67722
Erysipelotrichaceae_g_unclassified	0.3522	2.01274	4.50456	0.83566	0.527179	0.32631	2.33219	0.566137	1.17694	2.2656	4.08756	1.57334
Negativicutes	0.942295	0.667665	0.664959	1.43953	0.630084	0.430403	0.836664	0.876562	1.16791	0.463108	0.495505	0.702618
Selenomonadales	0.942295	0.667665	0.664959	1.43953	0.630084	0.430403	0.836664	0.876562	1.16791	0.463108	0.495505	0.702618
Veillonellaceae	0.768382	0.226923	0.281898	0.766991	0.0500315	0.20354	0.855913	0.955453	0.873902	0.238684	0.334048	0.574132
Anaerovibrio	0.412676	0.0479701	0.063148	0.187621	0.0108082	0.00728991	0.142906	0.277252	0.767644	0.0397047	0.151559	0.419021
Veillonella	5.5178	5.65362	4.0541	8.11206	2.21568	3.9402	9.47829	9.55453	4.36597	3.87444	1.05225	4.46257
Veillonellaceae_g_unclassified	1.34301	0.353732	0.550557	0.925565	0.0363226	0.258586	1.69471	1.72624	1.05939	0.593728	0.436759	0.698957
Firmicutes_c_unclassified	1.02631	0.994425	1.70443	1.52114	0.463747	0.514763	1.48976	1.16882	1.59331	1.20503	1.41455	1.24801
Firmicutes_c_o_unclassified	1.02631	0.994425	1.70443	1.52114	0.463747	0.514763	1.48976	1.16882	1.59331	1.20503	1.41455	1.24801
Firmicutes_c_o_f_unclassified	1.02631	0.994425	1.70443	1.52114	0.463747	0.514763	1.48976	1.16882	1.59331	1.20503	1.41455	1.24801
Firmicutes_c_o_f_g_unclassified	1.02631	0.994425	1.70443	1.52114	0.463747	0.514763	1.48976	1.16882	1.59331	1.20503	1.41455	1.24801
Proteobacteria	3.53139	0.14134	0.675684	1.39863	0.886273	0.700826	7.372	0.779961	0.923571	1.16449	0.389723	2.63177
Tenericutes	3.10676	53.0288	17.5463	2.25335	0.488664	10.9525	24.4948	2.00913	1.20904	2.43988	22.5014	4.80851
Mollicutes	3.10676	53.0288	17.5463	2.25335	0.488664	10.9525	24.4948	2.00913	1.20904	2.43988	22.5014	4.80851
Mollicutes_RF9	3.16617	63.8794	17.6804	2.29099	0.474789	12.2225	24.2223	2.09615	1.22255	2.54689	26.1602	4.75282
Anaeroplasmatales_f_unclassified	3.16617	63.8794	17.6804	2.29099	0.474789	12.2225	24.2223	2.09615	1.22255	2.54689	26.1602	4.75282
Anaeroplasmatales_f_g_unclassified	3.16617	63.8794	17.6804	2.29099	0.474789	12.2225	24.2223	2.09615	1.22255	2.54689	26.1602	4.75282
Bacteria_unclassified_phylum	1.4533	1.58322	1.85521	1.351	1.01629	1.77971	1.68975	2.11924	1.36418	1.19429	1.30481	1.36804
Bacteria_unclassified_phylum_c_unclassified	1.4533	1.58322	1.85521	1.351	1.01629	1.77971	1.68975	2.11924	1.36418	1.19429	1.30481	1.36804
Bacteria_unclassified_phylum_c_o_unclassified	1.4533	1.58322	1.85521	1.351	1.01629	1.77971	1.68975	2.11924	1.36418	1.19429	1.30481	1.36804
Bacteria_unclassified_phylum_c_o_f_unclassified	1.4533	1.58322	1.85521	1.351	1.01629	1.77971	1.68975	2.11924	1.36418	1.19429	1.30481	1.36804
Bacteria_unclassified_phylum_c_o_f_g_unclassified	1.4533	1.58322	1.85521	1.351	1.01629	1.77971	1.68975	2.11924	1.36418	1.19429	1.30481	1.36804
Shannon Evenness (genera) Wk4/Wk0	1.03866	1.16423	1.12065	1.17201	0.931548	0.950928	1.09157	1.01694	1.04249	1.08448	0.934026	1.11325
Shannon H (genera) Wk4/Wk0	1.06872	1.14112	1.15588	1.17201	0.976599	0.953328	1.11186	1.08186	1.01318	1.13851	1.00808	1.11613
Richness (genera) Wk4/Wk0	1.13793	0.913978	1.14286	1	1.23377	1.01136	1.08537	1.31507	0.878788	1.24	1.39062	1.01163
Glucuronidase activity ratio Wk4/Wk0	1.57915	1.49959	2.22207	2.61308	0.583868	1.79646	1.07709	2.37295	1.48191	3.54513	1.96152	1.35645

## Sheet: Wk0_or_Wk4_Unique
## Unique taxa: those that had zero abundance values in either week 0 or week 4 samples
## % Abundance of sequences assigned to taxa that are unique to week 4 samples (not detected in week 0 samples)
			Control group												Untreated			Pom			BaP			PomBap
taxlevel	rankID	taxon	Wk0_C01_U	Wk0_C02_U	Wk0_C03_U	Wk0_C04_P	Wk0_C05_P	Wk0_C06_P	Wk0_C07_B	Wk0_C08_B	Wk0_C09_B	Wk0_C10_PB	Wk0_C11_PB	Wk0_C12_PB	Wk04_C01_U	Wk04_C02_U	Wk04_C03_U	Wk04_C04_P	Wk04_C05_P	Wk04_C06_P	Wk04_C07_B	Wk04_C08_B	Wk04_C09_B	Wk04_C10_PB	Wk04_C11_PB	Wk04_C12_PB
1	0.1	Archaea	0	0	0	0	0	0	0	0	0	0	0	0	0.0162575	0	0.0175377	0	0	0	0	0.0128452	0.0163747	0	0.0117316	0
2	0.1.6	Euryarchaeota	0	0	0	0	0	0	0	0	0	0	0	0	0.0162575	0	0.0175377	0	0	0	0	0.0128452	0.0163747	0	0.0117316	0
3	0.1.6.3	Methanobacteria	0	0	0	0	0	0	0	0	0	0	0	0	0	0	0.0175377	0	0	0	0	0.0128452	0.0163747	0	0.0117316	0
4	0.1.6.3.1	Methanobacteriales	0	0	0	0	0	0	0	0	0	0	0	0	0	0	0.0175377	0	0	0	0	0.0128452	0.0163747	0	0.0117316	0
5	0.1.6.3.1.1	Methanobacteriaceae	0	0	0	0	0	0	0	0	0	0	0	0	0	0	0.0175377	0	0	0	0	0.0128452	0.0163747	0	0.0117316	0
6	0.1.6.3.1.1.2	Methanobrevibacter	0	0	0	0	0	0	0	0	0	0	0	0	0	0	0.0175377	0	0	0	0	0.0128452	0.0163747	0	0.0117316	0
3	0.1.6.8	Thermoplasmata	0	0	0	0	0	0	0	0	0	0	0	0	0.0162575	0	0	0	0	0	0	0	0	0	0	0
4	0.1.6.8.8	Thermoplasmatales	0	0	0	0	0	0	0	0	0	0	0	0	0.0162575	0	0	0	0	0	0	0	0	0	0	0
5	0.1.6.8.8.19	Thermoplasmatales_Incertae_Sedis	0	0	0	0	0	0	0	0	0	0	0	0	0.0162575	0	0	0	0	0	0	0	0	0	0	0
6	0.1.6.8.8.19.1	Candidatus_Methanogranum	0	0	0	0	0	0	0	0	0	0	0	0	0.0162575	0	0	0	0	0	0	0	0	0	0	0
4	0.2.3.2.10	Micrococcales	0	0	0	0	0	0	0	0	0	0	0	0	0	0	0	0	0.0085317	0	0	0	0	0	0	0
5	0.2.3.2.10.12	Micrococcaceae	0	0	0	0	0	0	0	0	0	0	0	0	0	0	0	0	0.0085317	0	0	0	0	0	0	0
6	0.2.3.2.10.12.9	Rothia	0	0	0	0	0	0	0	0	0	0	0	0	0	0	0	0	0.0085317	0	0	0	0	0	0	0
6	0.2.9.5.1.20.17	Porphyromonadaceae_g_unclassified	0	0	0	0	0	0	0	0	0	0	0	0	0.0162575	0	0	0	0	0	0	0.0256904	0	0	0.0117316	0
6	0.2.9.5.1.22.6	Rikenella	0	0	0	0	0	0	0	0	0	0	0	0	0	0	0	0	0	0.0109325	0	0	0	0	0	0
6	0.2.9.5.1.22.11	dgA-11_gut_group	0	0	0	0	0	0	0	0	0	0	0	0	0	0	0	0	0.0085317	0	0	0	0	0	0	0
2	0.2.25	Elusimicrobia	0	0	0	0	0	0	0	0	0	0	0	0	0	0	0	0	0	0.0109325	0	0	0.0163747	0	0	0
3	0.2.25.1	Elusimicrobia_class	0	0	0	0	0	0	0	0	0	0	0	0	0	0	0	0	0	0.0109325	0	0	0.0163747	0	0	0
4	0.2.25.1.2	Elusimicrobiales	0	0	0	0	0	0	0	0	0	0	0	0	0	0	0	0	0	0.0109325	0	0	0.0163747	0	0	0
5	0.2.25.1.2.1	Elusimicrobiaceae	0	0	0	0	0	0	0	0	0	0	0	0	0	0	0	0	0	0.0109325	0	0	0.0163747	0	0	0
6	0.2.25.1.2.1.1	Elusimicrobium	0	0	0	0	0	0	0	0	0	0	0	0	0	0	0	0	0	0.0109325	0	0	0.0163747	0	0	0
5	0.2.26.1.1.13	Fibrobacterales_f_unclassified	0	0	0	0	0	0	0	0	0	0	0	0	0.0162575	0	0	0	0	0	0	0	0	0	0	0
6	0.2.26.1.1.13.1	Fibrobacterales_f_g_unclassified	0	0	0	0	0	0	0	0	0	0	0	0	0.0162575	0	0	0	0	0	0	0	0	0	0	0
5	0.2.27.1.4.1	Aerococcaceae	0	0	0	0	0	0	0	0	0	0	0	0	0.0162575	0	0	0	0	0	0	0	0	0	0	0
6	0.2.27.1.4.1.9	Aerococcaceae_g_unclassified	0	0	0	0	0	0	0	0	0	0	0	0	0.0162575	0	0	0	0	0	0	0	0	0	0	0
6	0.2.27.1.4.9.1	Lactococcus	0	0	0	0	0	0	0	0	0	0	0	0	0	0	0	0	0	0	0	0	0	0.0129955	0	0
6	0.2.27.1.4.9.3	Streptococcaceae_g_unclassified	0	0	0	0	0	0	0	0	0	0	0	0	0	0	0	0	0	0	0	0.0128452	0	0	0	0
5	0.2.27.2.2.13	Family_XI	0	0	0	0	0	0	0	0	0	0	0	0	0	0.0152929	0	0	0	0.0109325	0	0.0128452	0	0	0	0
6	0.2.27.2.2.13.5	Finegoldia	0	0	0	0	0	0	0	0	0	0	0	0	0	0.0152929	0	0	0	0	0	0.0128452	0	0	0	0
6	0.2.27.2.2.13.17	Tissierella	0	0	0	0	0	0	0	0	0	0	0	0	0	0	0	0	0	0.0109325	0	0	0	0	0	0
6	0.2.27.2.2.15.8	[Eubacterium]_nodatum_group	0	0	0	0	0	0	0	0	0	0	0	0	0	0	0	0	0	0	0.0119847	0	0	0	0	0
6	0.2.27.2.2.25.34	Lachnospiraceae_ND3007_group	0	0	0	0	0	0	0	0	0	0	0	0	0	0.0458786	0	0.0582581	0	0	0	0	0	0.0129955	0	0
6	0.2.27.2.2.25.37	Lachnospiraceae_NK4B4_group	0	0	0	0	0	0	0	0	0	0	0	0	0.0162575	0	0	0	0	0	0.0239693	0	0.0327493	0	0	0
6	0.2.27.2.2.25.71	[Eubacterium]_ventriosum_group	0	0	0	0	0	0	0	0	0	0	0	0	0	0	0.0175377	0.029129	0.0170634	0	0	0.0128452	0	0	0	0
5	0.2.27.2.2.28	Peptococcaceae	0	0	0	0	0	0	0	0	0	0	0	0	0.032515	0	0	0	0	0.0218651	0	0.0128452	0	0	0	0
6	0.2.27.2.2.28.11	Peptococcus	0	0	0	0	0	0	0	0	0	0	0	0	0.032515	0	0	0	0	0.0218651	0	0.0128452	0	0	0	0
6	0.2.27.2.2.29.4	Intestinibacter	0	0	0	0	0	0	0	0	0	0	0	0	0	0.0152929	0	0	0	0	0	0	0.0163747	0	0	0
6	0.2.27.2.2.29.11	Terrisporobacter	0	0	0	0	0	0	0	0	0	0	0	0	0	0	0	0	0	0	0	0	0	0	0	0.0213265
6	0.2.27.2.2.30.1	Acetanaerobacterium	0	0	0	0	0	0	0	0	0	0	0	0	0	0	0.0175377	0.0145645	0.0085317	0	0	0.0128452	0	0	0	0
6	0.2.27.2.2.30.11	Flavonifractor	0	0	0	0	0	0	0	0	0	0	0	0	0.0162575	0	0	0	0	0	0	0	0	0	0	0
6	0.2.27.2.2.30.12	Hydrogenoanaerobacterium	0	0	0	0	0	0	0	0	0	0	0	0	0.0162575	0	0	0	0	0	0	0	0.0163747	0	0	0
6	0.2.27.2.2.30.16	Papillibacter	0	0	0	0	0	0	0	0	0	0	0	0	0	0	0	0	0	0.0109325	0	0.0256904	0	0	0	0
6	0.2.27.2.2.30.26	Ruminococcaceae_UCG-002	0	0	0	0	0	0	0	0	0	0	0	0	0	0	0	0	0.0426585	0	0	0	0	0	0	0
4	0.2.49.6.10	Neisseriales	0	0	0	0	0	0	0	0	0	0	0	0	0	0	0	0	0	0	0.0239693	0	0	0	0	0
5	0.2.49.6.10.1	Neisseriaceae	0	0	0	0	0	0	0	0	0	0	0	0	0	0	0	0	0	0	0.0239693	0	0	0	0	0
6	0.2.49.6.10.1.32	Neisseriaceae_g_unclassified	0	0	0	0	0	0	0	0	0	0	0	0	0	0	0	0	0	0	0.0239693	0	0	0	0	0
6	0.2.49.7.8.4.6	Desulfovibrionaceae_g_unclassified	0	0	0	0	0	0	0	0	0	0	0	0	0.0162575	0	0	0.0145645	0	0	0	0.0256904	0	0	0	0
6	0.2.49.11.37.1.1	Actinobacillus	0	0	0	0	0	0	0	0	0	0	0	0	0	0	0	0	0	0	0.0119847	0	0	0	0	0
5	0.2.55.1.1.9	Spirochaetales_f_unclassified	0	0	0	0	0	0	0	0	0	0	0	0	0	0	0	0	0	0	0	0	0.0163747	0	0	0
6	0.2.55.1.1.9.1	Spirochaetales_f_g_unclassified	0	0	0	0	0	0	0	0	0	0	0	0	0	0	0	0	0	0	0	0	0.0163747	0	0	0
2	0.2.62	Verrucomicrobia	0	0	0	0	0	0	0	0	0	0	0	0	0	0.0611714	0	0.0145645	0.0085317	0.0655953	0	0	0.0163747	0.0129955	0.0234632	0
3	0.2.62.9	Verrucomicrobiae	0	0	0	0	0	0	0	0	0	0	0	0	0	0.0611714	0	0.0145645	0.0085317	0.0655953	0	0	0.0163747	0.0129955	0.0117316	0
4	0.2.62.9.1	Verrucomicrobiales	0	0	0	0	0	0	0	0	0	0	0	0	0	0.0611714	0	0.0145645	0.0085317	0.0655953	0	0	0.0163747	0.0129955	0.0117316	0
5	0.2.62.9.1.5	Verrucomicrobiaceae	0	0	0	0	0	0	0	0	0	0	0	0	0	0.0611714	0	0.0145645	0.0085317	0.0655953	0	0	0.0163747	0.0129955	0.0117316	0
6	0.2.62.9.1.5.1	Akkermansia	0	0	0	0	0	0	0	0	0	0	0	0	0	0.0611714	0	0.0145645	0.0085317	0.0655953	0	0	0.0163747	0.0129955	0.0117316	0
3	0.2.62.10	Verrucomicrobiaceae_c_unclassified	0	0	0	0	0	0	0	0	0	0	0	0	0	0	0	0	0	0	0	0	0	0	0.0117316	0
4	0.2.62.10.1	Verrucomicrobiaceae_c_o_unclassified	0	0	0	0	0	0	0	0	0	0	0	0	0	0	0	0	0	0	0	0	0	0	0.0117316	0
5	0.2.62.10.1.1	Verrucomicrobiaceae_c_o_f_unclassified	0	0	0	0	0	0	0	0	0	0	0	0	0	0	0	0	0	0	0	0	0	0	0.0117316	0
6	0.2.62.10.1.1.1	Verrucomicrobiaceae_c_o_f_g_unclassified	0	0	0	0	0	0	0	0	0	0	0	0	0	0	0	0	0	0	0	0	0	0	0.0117316	0
## % Abundance of sequences assigned to taxa that are unique to week 0 samples (not detected in week 4 samples)
			Control group												Untreated			Pom			BaP			PomBap
taxlevel	rankID	taxon	Wk0_C01_U	Wk0_C02_U	Wk0_C03_U	Wk0_C04_P	Wk0_C05_P	Wk0_C06_P	Wk0_C07_B	Wk0_C08_B	Wk0_C09_B	Wk0_C10_PB	Wk0_C11_PB	Wk0_C12_PB	Wk04_C01_U	Wk04_C02_U	Wk04_C03_U	Wk04_C04_P	Wk04_C05_P	Wk04_C06_P	Wk04_C07_B	Wk04_C08_B	Wk04_C09_B	Wk04_C10_PB	Wk04_C11_PB	Wk04_C12_PB
4	0.2.3.2.18	Actinobacteria_o_unclassified	0	0.00811491	0	0	0	0	0	0	0	0	0	0	0	0	0	0	0	0	0	0	0	0	0	0
5	0.2.3.2.18.1	Actinobacteria_f_unclassified	0	0.00811491	0	0	0	0	0	0	0	0	0	0	0	0	0	0	0	0	0	0	0	0	0	0
6	0.2.3.2.18.1.1	Actinobacteria_g_unclassified	0	0.00811491	0	0	0	0	0	0	0	0	0	0	0	0	0	0	0	0	0	0	0	0	0	0
6	0.2.3.3.1.1.5	Coriobacteriaceae_UCG-003	0	0	0	0	0	0	0	0	0.0650089	0	0	0	0	0	0	0	0	0	0	0	0	0	0	0
6	0.2.9.5.1.21.13	Prevotellaceae_UCG-004	0	0	0	0	0	0	0.0130056	0	0	0	0	0	0	0	0	0	0	0	0	0	0	0	0	0
5	0.2.27.1.4.2	Carnobacteriaceae	0	0	0.0583998	0	0	0	0	0	0	0	0	0	0	0	0	0	0	0	0	0	0	0	0	0
6	0.2.27.1.4.2.17	Carnobacteriaceae_g_unclassified	0	0	0.0583998	0	0	0	0	0	0	0	0	0	0	0	0	0	0	0	0	0	0	0	0	0
6	0.2.27.2.2.4.4	Clostridium_sensu_stricto_1	0	0	0	0	0	0	0.0260112	0	0.0487567	0	0	0	0	0	0	0	0	0	0	0	0	0	0	0
6	0.2.27.2.2.25.42	Lachnospiraceae_UCG-005	0	0	0	0.0104134	0	0	0.0130056	0	0	0	0	0.0143369	0	0	0	0	0	0	0	0	0	0	0	0
6	0.2.27.2.2.25.58	Roseburia	0.0294638	0.00811491	0	0	0.038506	0	0.0130056	0	0	0	0	0.0286738	0	0	0	0	0	0	0	0	0	0	0	0
6	0.2.27.2.2.25.64	Tyzzerella_3	0	0	0	0	0.019253	0	0	0	0	0	0	0	0	0	0	0	0	0	0	0	0	0	0	0
6	0.2.27.2.2.30.6	Butyricicoccus	0	0	0	0	0	0	0	0	0	0	0.0301023	0	0	0	0	0	0	0	0	0	0	0	0	0
6	0.2.27.2.2.30.9	Faecalibacterium	0	0	0	0	0	0	0.0130056	0.0188218	0.0650089	0	0	0	0	0	0	0	0	0	0	0	0	0	0	0
6	0.2.27.2.2.30.43	Subdoligranulum	0	0	0	0	0	0	0.0130056	0	0	0	0	0	0	0	0	0	0	0	0	0	0	0	0	0
6	0.2.27.3.1.1.5	Catenibacterium	0	0	0	0	0	0	0	0	0.0487567	0.0547845	0	0	0	0	0	0	0	0	0	0	0	0	0	0
6	0.2.27.3.1.1.19	Faecalicoccus	0	0	0	0	0	0	0	0	0.0162522	0	0	0	0	0	0	0	0	0	0	0	0	0	0	0
6	0.2.27.4.1.2.13	Megasphaera	0	0.0162298	0	0	0	0	0	0	0	0	0	0	0	0	0	0	0	0	0	0	0	0	0	0
5	0.2.28.1.1.3	Leptotrichiaceae	0	0	0	0.0104134	0	0	0	0	0	0	0	0	0	0	0	0	0	0	0	0	0	0	0	0
6	0.2.28.1.1.3.1	Leptotrichia	0	0	0	0.0104134	0	0	0	0	0	0	0	0	0	0	0	0	0	0	0	0	0	0	0	0
2	0.2.48	Planctomycetes	0	0	0	0.0104134	0	0	0	0	0	0	0	0	0	0	0	0	0	0	0	0	0	0	0	0
3	0.2.48.9	Planctomycetacia	0	0	0	0.0104134	0	0	0	0	0	0	0	0	0	0	0	0	0	0	0	0	0	0	0	0
4	0.2.48.9.2	Planctomycetales	0	0	0	0.0104134	0	0	0	0	0	0	0	0	0	0	0	0	0	0	0	0	0	0	0	0
5	0.2.48.9.2.1	Planctomycetaceae	0	0	0	0.0104134	0	0	0	0	0	0	0	0	0	0	0	0	0	0	0	0	0	0	0	0
6	0.2.48.9.2.1.22	p-1088-a5_gut_group	0	0	0	0.0104134	0	0	0	0	0	0	0	0	0	0	0	0	0	0	0	0	0	0	0	0
6	0.2.49.6.5.1.22	Sutterella	0	0	0	0	0	0.0127632	0	0	0	0	0	0	0	0	0	0	0	0	0	0	0	0	0	0
4	0.2.49.7.21	Deltaproteobacteria_o_unclassified	0	0	0	0	0	0	0	0.0188218	0	0	0	0	0	0	0	0	0	0	0	0	0	0	0	0
5	0.2.49.7.21.1	Deltaproteobacteria_o_f_unclassified	0	0	0	0	0	0	0	0.0188218	0	0	0	0	0	0	0	0	0	0	0	0	0	0	0	0
6	0.2.49.7.21.1.1	Deltaproteobacteria_o_f_g_unclassified	0	0	0	0	0	0	0	0.0188218	0	0	0	0	0	0	0	0	0	0	0	0	0	0	0	0
4	0.2.49.9.6	Epsilonproteobacteria_o_unclassified	0	0.00811491	0	0	0	0	0	0	0	0	0	0.0286738	0	0	0	0	0	0	0	0	0	0	0	0
5	0.2.49.9.6.1	Epsilonproteobacteria_o_f_unclassified	0	0.00811491	0	0	0	0	0	0	0	0	0	0.0286738	0	0	0	0	0	0	0	0	0	0	0	0
6	0.2.49.9.6.1.1	Epsilonproteobacteria_o_f_g_unclassified	0	0.00811491	0	0	0	0	0	0	0	0	0	0.0286738	0	0	0	0	0	0	0	0	0	0	0	0
2	0.2.54	Saccharibacteria	0.0147319	0	0	0	0	0	0	0	0	0	0	0	0	0	0	0	0	0	0	0	0	0	0	0
3	0.2.54.1	Saccharibacteria_Unknown_Class	0.0147319	0	0	0	0	0	0	0	0	0	0	0	0	0	0	0	0	0	0	0	0	0	0	0
4	0.2.54.1.1	Saccharibacteria_Unknown_Order	0.0147319	0	0	0	0	0	0	0	0	0	0	0	0	0	0	0	0	0	0	0	0	0	0	0
5	0.2.54.1.1.1	Saccharibacteria_Unknown_Family	0.0147319	0	0	0	0	0	0	0	0	0	0	0	0	0	0	0	0	0	0	0	0	0	0	0
6	0.2.54.1.1.1.1	Candidatus_Saccharimonas	0.0147319	0	0	0	0	0	0	0	0	0	0	0	0	0	0	0	0	0	0	0	0	0	0	0

## Sheet: Microbiome_Clusters
##These data combine the relative abundance (%) of six microbiome co-abundance clusters in all samples
													Untreated			Pom			BaP			PomBap
Cluster	Wk0_C01_U	Wk0_C02_U	Wk0_C03_U	Wk0_C04_P	Wk0_C05_P	Wk0_C06_P	Wk0_C07_B	Wk0_C08_B	Wk0_C09_B	Wk0_C10_PB	Wk0_C11_PB	Wk0_C12_PB	Wk04_C01_U	Wk04_C02_U	Wk04_C03_U	Wk04_C04_P	Wk04_C05_P	Wk04_C06_P	Wk04_C07_B	Wk04_C08_B	Wk04_C09_B	Wk04_C10_PB	Wk04_C11_PB	Wk04_C12_PB
Microbiome Cluster 1	44.3282	48.1539	52.2289	40.3728	44.8595	44.9266	50.9949	45.3981	44.7587	56.4828	46.5683	51.3262	32.0923	24.1474	23.974	28.4445	39.9027	28.5886	24.0173	31.8433	30.6042	32.4237	18.8409	42.5677
Microbiome Cluster 2	1.9888	1.82585	1.30426	2.36384	1.98306	2.55265	1.52165	2.46565	2.90915	1.60701	1.95665	1.14695	1.82084	4.0679	4.5598	3.29158	1.13472	0.983929	4.39837	1.97816	2.84919	5.30214	6.92163	2.34592
Microbiome Cluster 3	0.589275	0.511239	0.564532	0.749766	0.481325	0.485003	0.481207	0.715227	0.487567	0.36523	0.391331	0.544803	0.780361	0.795229	0.701508	0.4515	0.801979	1.11512	0.551294	0.680796	1.2936	0.532814	0.680432	0.554489
Microbiome Cluster 4	5.43606	2.91325	4.30212	6.2897	4.79399	6.62412	3.31643	5.08187	6.64716	2.02703	3.94341	6.42294	13.2824	28.4753	27.1659	18.5843	8.44638	19.7114	21.1529	8.74759	13.1816	8.39506	19.2163	10.6633
Microbiome Cluster 5	1.45846	0.527469	0.330932	1.05175	1.84829	0.804084	0.962414	0.922266	1.00764	0.529584	1.41481	1.53405	2.34108	0.932864	0.964574	0.553452	1.22856	1.00579	1.06663	1.38728	1.65384	0.597791	0.703895	2.06867
Microbiome Cluster 6	1.23748	2.82399	0.506132	1.85359	1.03966	1.71027	0.520224	1.61867	1.67398	0.182615	0.481638	0.55914	0.032515	1.54458	1.43809	0.597145	0.494838	0.295179	0.922819	0.937701	1.14623	5.67901	6.92163	1.15163
##These data combine the week 0/week 4 relative abundance ratios of six microbiome co-abundance clusters in all samples
													Untreated			Pom			BaP			PomBap
												Cluster	Wk04_C01_U	Wk04_C02_U	Wk04_C03_U	Wk04_C04_P	Wk04_C05_P	Wk04_C06_P	Wk04_C07_B	Wk04_C08_B	Wk04_C09_B	Wk04_C10_PB	Wk04_C11_PB	Wk04_C12_PB
												Microbiome Cluster 1	0.723971	0.501464	0.459019	0.704546	0.889506	0.63634	0.470973	0.701424	0.683761	0.574044	0.404587	0.829357
												Microbiome Cluster 2	0.915546	2.22794	3.49608	1.39247	0.572205	0.385454	2.89052	0.802289	0.979389	3.29938	3.53749	2.04535
												Microbiome Cluster 3	1.32427	1.55549	1.24264	0.602188	1.66619	2.2992	1.14565	0.951861	2.65317	1.45884	1.73876	1.01778
												Microbiome Cluster 4	2.44338	9.77441	6.31454	2.95472	1.76187	2.9757	6.37823	1.72133	1.98304	4.14156	4.87303	1.66018
												Microbiome Cluster 5	1.60518	1.76857	2.91472	0.526218	0.664704	1.25086	1.10829	1.50421	1.6413	1.12879	0.497519	1.3485
												Microbiome Cluster 6	0.0262752	0.54695	2.84134	0.322157	0.475961	0.172591	1.77389	0.579303	0.684731	31.0983	14.371	2.05965
## Cluster members*
Cluster	Cluster name				Cluster members (whose abundance % values were added)
Microbiome Cluster 1	Lactobacillaceae_Prevoteallaceae_CAG				Enterorhabdus, Bacteroidales_S24-7_group, Prevotellaceae, Lactobacillaceae, Family_XIII_UCG-001, Lachnospiraceae, Anaerovibrio
Microbiome Cluster 2	Erysip2elotrichaceae_CAG				Streptococcus, Family_XIII_AD3011_group, Erysipelotrichaceae_UCG-003, Holdemanella, Turicibacter, Erysipelotrichaceae_g_unclassified
Microbiome Cluster 3	Collinsella_CAG				Collinsella, Bacteroidia_o_f_unclassified, [Eubacterium]_coprostanoligenes_group, Treponema_2
Microbiome Cluster 4	RuminococcaceaeUCG_CAG				Parabacteroides, Anaerovorax, Romboutsia, Peptostreptococcaceae_g_unclassified, Ruminiclostridium_5, Ruminococcaceae_UCG-005, Ruminococcaceae_UCG-013, Ruminococcaceae_UCG-014, Clostridiales_f_unclassified, Phascolarctobacterium, Veillonella, Selenomonadales_f_unclassified, Anaeroplasmatales_f_unclassified, Mollicutes_o_f_unclassified
Microbiome Cluster 5	Ruminococcaceae2_CAG				Anaerotruncus, Ruminococcus_1, Ruminococcaceae_g_unclassified
Microbiome Cluster 6	Allobaculum_CAG				Allobaculum, Erysipelatoclostridium
* Some cluster members, detected by the correlation analysis, had low total abundance values, and were thus no included in the final analysis
