# Supplementary material for: Integrating Microbiome Analysis, Metabolomics, Bioinformatics, and Histopathology to Elucidate the Protective Effects of Pomegranate Juice against Benzo-alpha-pyrene-Induced Colon Pathologies
Source: Int J Mol Sci. 2023 Jun 27;24(13):10691. doi: 10.3390/ijms241310691 (PMC10341650; doi:10.3390/ijms241310691)
Supplement: Supplementary file 1 [file ijms-24-10691-s001.zip › HA_PomBaP_Supplementary_Data_S2.xlsx]

## Sheet: Metabolite_normalized_levels
## Levels of all identified metabolites, calculated from peak areas-under-the-curve normalized to the xylitol peak
					Control Group																																		Untreated									Pom
Metabolite Name	Class	S/N average	Peak number	Average Rt(min)	Wk0_C01_U_a	Wk0_C01_U_b	Wk0_C01_U_c	Wk0_C02_U_a	Wk0_C02_U_b	Wk0_C02_U_c	Wk0_C03_U_a	Wk0_C03_U_b	Wk0_C03_U_c	Wk0_C04_P_a	Wk0_C04_P_b	Wk0_C04_P_c	Wk0_C05_P_b	Wk0_C05_P_c	Wk0_C06_P_a	Wk0_C06_P_b	Wk0_C06_P_c	Wk0_C07_B_a	Wk0_C07_B_b	Wk0_C07_B_c	Wk0_C08_B_a	Wk0_C08_B_b	Wk0_C08_B_c	Wk0_C09_B_a	Wk0_C09_B_b	Wk0_C09_B_c	Wk0_C10_BP_b	Wk0_C10_BP_c	Wk0_C11_BP_a	Wk0_C11_BP_b	Wk0_C11_BP_c	Wk0_C12_BP_a	Wk0_C12_BP_b	Wk0_C12_BP_c	Wk04_C01_U_a	Wk04_C01_U_b	Wk04_C01_U_c	Wk04_C02_U_a	Wk04_C02_U_b	Wk04_C02_U_c	Wk04_C03_U_a	Wk04_C03_U_b	Wk04_C03_U_c	Wk04_C04_P_a	Wk04_C04_P_b
Butyric acid	Acids	106.02	3	6.689	0.0384879	0.0424334	0.0418159	0.000415243	0.000786351	0.00102117	0.0631597	0.0582415	0.0525042	0.00311829	0.00133329	0.00105031	0.0536943	0.0682316	0.00398042	0.00260591	0.00114709	0.0544008	0.0545784	0.056467	0.00153606	0.00131374	0.000930849	0.0482725	0.0394835	0.0405732	0.00138627	0.00140693	0.0435757	0.0367978	0.0334175	0.00140069	0.0014214	0.000680139	0.0690734	0.0620034	0.0643955	0.00197256	0.00183341	0.00137927	0.0255536	0.0643238	0.0625453	0.00184937	0.000798666
Isovaleric acid	Acids	16.11	5	7.494	0.0084674	0.00778829	0.00790506	0.0202316	0.0237549	0.0309664	0.0249374	0.0171076	0.013516	0.0253582	0.0243383	0.0106607	0.0254688	0.0312319	0.0208617	0.01356	0.0179215	0.0332321	0.034199	0.0585324	0.0132214	0.0120589	0.0217674	0.0137462	0.00820219	0.0113344	0.0350957	0.0215217	0.0263323	0.0105109	0.00629152	0.00683044	0.00478418	0.00649004	0.0225673	0.0186321	0.026639	0.0195971	0.029136	0.0259048	0.0434208	0.0416085	0.0261117	0.0569062	0.0379693
Propionic acid	Acids	360.63	7	7.938	0.000414419	0.000424873	0.000581445	0.000155961	0.00147719	0.0012453	0.000586683	0.000712511	0.000749619	0.00170963	0.00147395	0.107059	0.000676187	0.00025168	0.00161966	0.00100846	0.0020027	0.000201513	0.17491	0.163013	0.00159214	0.00122358	0.00145691	0.115578	0.102733	0.10724	0.00156016	0.00164332	0.132243	0.108585	0.000182592	0.00107744	0.00174644	0.079808	0.131	0.000211385	0.000807318	0.00219874	0.00263162	0.00213017	0.104921	0.150883	0.114091	0.000585487	0.0675153
Valeric acid	Acids	27.51	8	8.301	0.0157269	0.0122544	0.0135509	0.052739	0.0624478	0.0774889	0.0422884	0.02926	0.0235888	0.0470816	0.0404618	0.0208393	0.0593661	0.0666888	0.0450904	0.0308431	0.0454999	0.081251	0.0778417	0.12543	0.0223495	0.0221874	0.0383636	0.0216192	0.0101168	0.0203992	0.0377853	0.0262298	0.0394703	0.0150127	0.00937961	0.0111036	0.00937797	0.0111238	0.0715674	0.0617706	0.0732983	0.0409281	0.0548817	0.049983	0.068105	0.111419	0.0658928	0.0674759	0.00663845
Lactic acid	Acids	15.95	12	9.837	0.415696	0.292429	0.385842	0.161564	0.167034	0.125516	0.484435	0.775713	0.559026	0.1124	0.097206	0.0963749	0.0651641	0.084802	0.804807	0.645216	0.854735	0.0957637	0.113991	0.0725227	0.12992	0.117548	0.131436	0.290259	0.468893	0.545096	0.109637	0.0938708	0.13668	0.176669	0.170107	0.119889	0.157664	0.153434	0.25981	0.292441	0.321257	0.730262	0.657864	0.614748	0.166553	0.213927	0.278479	0.379154	0.188577
Caproic acid	Acids	22.46	13	9.965	0.00921877	0.0108798	0.0105293	0.0562336	0.052892	0.0525821	0.0258078	0.0193445	0.0186653	0.0137658	0.0140369	0.013185	0.0411295	0.0437765	0.0327755	0.0238721	0.0358364	0.0326193	0.0276477	0.0436047	0.013458	0.011901	0.0176853	0.00991794	0.00658032	0.0105832	0.0111324	0.0105464	0.0150698	0.00706543	0.00798236	0.00580216	0.00519452	0.00507836	0.0334345	0.0347312	0.034425	0.0167379	0.017369	0.0211329	0.0205464	0.0203737	0.0200017	0.0112969	0.0111987
Glycolic acid	Acids	8.91	14	10.081	0.0183068	0.017382	0.0209628	0.0338634	0.035033	0.0279933	0.0271621	0.0225413	0.0233763	0.036266	0.0389362	0.0256267	0.0246998	0.0242239	0.0315758	0.0211766	0.0347531	0.0320022	0.0311228	0.0320069	0.0231756	0.0192702	0.0233241	0.0278938	0.0245827	0.0269856	0.0430029	0.038879	0.017243	0.0172942	0.0161764	0.0159718	0.0158443	0.0135164	0.018805	0.0199273	0.0261933	0.0384656	0.0390145	0.0488732	0.0110541	0.0169357	0.0214314	0.0437311	0.0202421
alpha-Hydroxybutyric acid	Acids	6.74	17	10.959	0.0108921	0.00717646	0.0102412	0.00844524	0.00740064	0.00795893	0.0137693	0.0157881	0.0113265	0.0108391	0.0129131	0.0092472	0.0071495	0.00829287	0.0127439	0.0109361	0.0132962	0.0105183	0.00874146	0.0119015	0.00984691	0.00976316	0.0107407	0.0067486	0.00776086	0.00900738	0.017447	0.0123452	0.00544505	0.00548607	0.00642796	0.00737455	0.00689222	0.00625182	0.00712968	0.00785825	0.00815665	0.00949485	0.00973233	0.00901699	0.00503373	0.00924583	0.0160418	0.0180749	0.00535073
beta-Lactic acid	Acids	33.64	18	11.189	0.0130165	0.0113755	0.0165461	0.00578606	0.00456656	0.0055856	0.0308766	0.0436349	0.0386087	0.0237701	0.0259174	0.00822172	0.00991176	0.0101649	0.00798247	0.00539562	0.00889869	0.0358732	0.0317379	0.0280576	0.0141376	0.0166969	0.00979549	0.025103	0.0229138	0.0270885	0.00634117	0.00533896	0.0743	0.0647876	0.0646353	0.00616675	0.0055443	0.00581949	0.00650325	0.00703699	0.00908918	0.00307175	0.00314999	0.00334719	0.00758696	0.00991601	0.00662945	0.00429453	0.00251796
2-Hydroxyvaleric acid	Acids	45.35	19	11.574	0.0152385	0.0161946	0.021481	0.0189854	0.0186209	0.0211207	0.0380633	0.0469112	0.0328503	0.0176001	0.0232516	0.0170516	0.0170893	0.0227465	0.0264772	0.026027	0.0259798	0.0206	0.0197257	0.0268178	0.0424521	0.0447964	0.0360389	0.0187242	0.023829	0.0247826	0.0581972	0.0386775	0.0284495	0.0265127	0.0358091	0.0486801	0.0398091	0.0394353	0.0170781	0.0170084	0.0198415	0.0117933	0.0133478	0.0125932	0.0395582	0.0825902	0.109434	0.0353327	0.0137751
2-Aminobutyric acid	Acids	39.98	20	11.69	0.0269077	0.0217963	0.0371157	0.0590445	0.0575549	0.0376111	0.0468085	0.0611909	0.0389235	0.0694928	0.0890832	0.0486889	0.0319685	0.0197308	0.0651848	0.0431578	0.0639143	0.0317365	0.0420771	0.0507914	0.0667563	0.0672436	0.068508	0.032333	0.0247677	0.0361037	0.0412448	0.0241017	0.0462972	0.0486893	0.0616445	0.0576041	0.0553294	0.0547477	0.00456077	0.00525904	0.00692481	0.0241375	0.0244712	0.0250894	0.000772718	0.0104418	0.0146236	0.0519482	0.00301541
gamma-Hydroxybutyric acid	Acids	65.39	22	12.658	0.283629	0.356585	0.356057	0.0874448	0.0992824	0.0814323	0.511357	0.522601	0.582082	0.107171	0.0938494	0.179332	0.588845	0.810018	0.0887433	0.0653612	0.105911	0.625102	0.640216	0.638988	0.104035	0.100534	0.10456	0.51618	0.430949	0.389683	0.112748	0.108737	0.43345	0.354302	0.279653	0.0900854	0.132441	0.112448	0.596977	0.635991	0.683684	0.127809	0.14794	0.135821	0.500294	0.812978	0.512635	0.140714	0.0792794
2-Hydroxyisocaproic acid	Acids	27.21	23	12.694	0.0122182	0.0103703	0.0142914	0.013032	0.0114484	0.0120976	0.0216118	0.0268749	0.0236346	0.0103435	0.0153018	0.0112765	0.0103866	0.0136033	0.0201742	0.01707	0.0215253	0.0112111	0.0106009	0.0155009	0.01817	0.0211567	0.0158836	0.0110289	0.0135562	0.0138235	0.0304688	0.0199112	0.0144164	0.0141117	0.0177347	0.0204806	0.0165838	0.0176523	0.00569752	0.00538503	0.0068563	0.0058973	0.00615706	0.00540408	0.0261717	0.0266898	0.0347722	0.0235304	0.0126002
Succinic acid	Acids	27.77	28	13.836	0.284726	0.281441	0.302481	0.198127	0.227404	0.185053	0.175692	0.313404	0.340778	0.117181	0.181888	0.0290259	0.146216	0.114811	0.194718	0.143868	0.208484	0.151347	0.16427	0.149319	0.259498	0.246739	0.125962	0.17453	0.260844	0.229838	0.139892	0.0813935	0.201142	0.271392	0.270806	0.417867	0.622314	0.580321	0.064797	0.0761668	0.0692903	0.158036	0.150184	0.1508	0.0381466	0.0409908	0.0395085	0.109561	0.0433174
4-Hydroxybutyric acid	Acids	9.25	32	14.862	0.00155333	0.00117498	0.00197455	0.00232766	0.00188599	0.00188645	0.00991791	0.00472802	0.0100032	0.00168674	0.00149814	0.0018736	0.00222544	0.00159489	0.00257865	0.00165601	0.00270374	0.00718014	0.00768683	0.0123357	0.00177405	0.00166695	0.00184771	0.00325196	0.00489365	0.00472992	0.00374831	0.00319708	0.00138144	0.00124369	0.00149474	0.011239	0.0109367	0.0115179	0.00216503	0.00230079	0.00188135	0.00181378	0.0022583	0.00227078	0.0064976	0.00699394	0.0088254	0.00714831	0.00411989
Decanoic acid	Acids	42.89	35	15.267	0.00839724	0.0146987	0.0178806	0.0143782	0.0106764	0.00666334	0.0190836	0.0151174	0.0117862	0.0199699	0.0182777	0.0174208	0.00158878	0.00239466	0.00632048	0.00508507	0.00871948	0.00343926	0.00288131	0.00291448	0.0160987	0.012527	0.0133338	0.0144091	0.013007	0.010779	0.00288734	0.00348451	0.00776185	0.00862183	0.00644777	0.0048988	0.0109423	0.00909633	0.00519725	0.00444528	0.00260041	0.0325975	0.028033	0.0223934	0.00683211	0.00622337	0.0239887	0.0326888	0.00705426
Tartaric acid	Acids	52.28	42	17.36	0.0113137	0.0080978	0.00971865	0.030945	0.0221814	0.0128312	0.0231375	0.0172115	0.024576	0.0204369	0.0370118	0.0158499	0.0244799	0.0165766	0.0278287	0.0265157	0.037022	0.0299864	0.0215629	0.0149123	0.0211503	0.0190385	0.0152531	0.0152298	0.0208014	0.0264531	0.0212401	0.0199711	0.00269019	0.00540061	0.00972438	0.00856795	0.00337534	0.000846789	0.00302508	0.00358116	0.00281492	0.00544928	0.00504423	0.00482655	0.00266073	0.00249698	0.00465591	0.00342744	0.00226345
beta-Phenyllactic acid	Acids	32.24	43	17.594	0.00655016	0.00462853	0.00574115	0.00475688	0.00424852	0.00319289	0.00787668	0.0145845	0.0097971	0.00336886	0.00592607	0.00416834	0.00402142	0.00422299	0.00662844	0.00604283	0.00717061	0.00601888	0.00475728	0.00710875	0.00705199	0.00693725	0.00560048	0.00482105	0.00849027	0.00781771	0.00414168	0.0027446	0.00800976	0.00892878	0.00977767	0.0075898	0.00632016	0.0073645	0.00160534	0.00263816	0.00241388	0.00399327	0.00428522	0.00371241	0.00930345	0.0081233	0.0107467	0.0100197	0.00503613
3-Hydroxyphenylacetic acid	Acids	60.52	45	17.846	0.00543236	0.00602877	0.00663328	0.00857138	0.00733326	0.00937028	0.00646215	0.00690853	0.00614104	0.00616227	0.00711641	0.00482389	0.0124148	0.0132195	0.00647083	0.00573696	0.00606779	0.00839656	0.00873773	0.0132668	0.00894391	0.0103674	0.00744583	0.00560377	0.00499541	0.00645301	0.00693002	0.00467473	0.0100901	0.00804277	0.0100009	0.00891019	0.00691302	0.00785723	0.0218166	0.0194725	0.0206763	0.019709	0.0239239	0.0200307	0.0249459	0.0214388	0.0179915	0.022438	0.013936
p-Hydroxyphenylacetic acid	Acids	30.2	48	18.212	0.0284898	0.0348443	0.0399093	0.0367883	0.0353225	0.0400633	0.0304805	0.0315658	0.0322153	0.0302932	0.032515	0.022629	0.0256436	0.0291519	0.0350155	0.0293919	0.0330183	0.031729	0.0292264	0.041165	0.0418019	0.0499296	0.0308629	0.0244429	0.0284024	0.0308937	0.0438556	0.0327044	0.026745	0.034334	0.0347472	0.0325678	0.0240838	0.0249326	0.0144365	0.0183886	0.0178888	0.0235539	0.0228078	0.0206736	0.000908197	0.0125148	0.0111727	0.0192038	0.0125126
Ribofuranose (isomer 1)	Acids	63.82	49	18.314	0.10078	0.117483	0.144357	0.176156	0.17778	0.206066	0.17483	0.159406	0.158156	0.109844	0.102422	0.0856663	0.136529	0.153139	0.13932	0.125705	0.148925	0.150637	0.165816	0.264477	0.120724	0.125682	0.115076	0.110511	0.112337	0.129729	0.195739	0.160988	0.177052	0.128728	0.123334	0.137852	0.123869	0.143608	0.0261868	0.0301697	0.0361465	0.0308007	0.037837	0.0341396	0.0757125	0.0506034	0.0295025	0.0287612	0.0273044
3-Hydroxyphenylpropionic acid	Acids	643.6	55	19.256	0.0599586	0.0556851	0.0843989	0.0873912	0.0656351	0.0760531	0.0585868	0.0591431	0.0588978	0.0595129	0.0776561	0.0616573	0.0303186	0.0405566	0.0506091	0.0508521	0.0496715	0.0472717	0.0462839	0.0679953	0.0971406	0.0960016	0.095519	0.0699089	0.0619582	0.0593754	0.0783023	0.0581438	0.076532	0.0727358	0.105071	0.103587	0.0763174	0.0731686	0.134406	0.108014	0.139698	0.0817417	0.0864382	0.0836497	0.23014	0.215247	0.210898	0.180124	0.133267
Azelaic acid	Acids	11.95	59	19.973	0.00747451	0.00568717	0.00697724	0.0170855	0.0146526	0.0157618	0.0109121	0.00925975	0.010214	0.0111191	0.0111705	0.00995934	0.0118294	0.00932918	0.0112832	0.00858047	0.0120134	0.015729	0.0177001	0.019956	0.00972097	0.00952439	0.00875005	0.0063767	0.00598126	0.0071814	0.0119744	0.0102497	0.00580703	0.00519231	0.00868369	0.0106712	0.00969243	0.00740888	0.00730047	0.00554344	0.00507233	0.0059647	0.00650316	0.00624455	0.00324959	0.00487875	0.00381813	0.0031543	0.00328369
5-Hydroxyindoleacetic acid	Acids	595.03	84	24.122	0.0219837	0.0264073	0.0384474	0.0197158	0.0200802	0.0263091	0.0221501	0.0258253	0.0191382	0.0105688	0.00971841	0.00661809	0.0115074	0.00853647	0.0159453	0.0161521	0.0156035	0.0204195	0.0206682	0.0240346	0.0241126	0.0311555	0.0209587	0.010442	0.0150182	0.0146014	0.0212504	0.00710073	0.0167652	0.017876	0.0213297	0.0799199	0.0842234	0.0637209	0.00970558	0.00714277	0.00375268	0.0266842	0.0429766	0.0159028	0.0466575	0.0922083	0.113285	0.0883759	0.0578375
Dehydroabietic acid	Acids	196.27	92	25.959	0.0105565	0.0109307	0.0114588	0.029366	0.0255997	0.0198023	0.0112192	0.0111072	0.00932956	0.0115387	0.0229091	0.014921	0.0254523	0.0289886	0.0188156	0.0112002	0.0180662	0.0288763	0.0289339	0.0311274	0.0204335	0.0207912	0.0314669	0.021997	0.0204123	0.0272053	0.00455042	0.00397914	0.0516615	0.0469649	0.0412802	0.0332271	0.0298167	0.0281972	0.0157549	0.0147	0.0150399	0.00784343	0.0113125	0.0103013	0.0274587	0.0327725	0.0807775	0.00651384	0.00700814
Ethylene glycol	Alcohol	31.49	9	8.452	0.000757949	0.000587707	0.00129523	0.0011452	0.000242667	0.0768678	0.064048	0.0690576	0.00273551	0.0933877	0.000640548	0.00157121	0.000665859	0.00104921	0.00133563	0.000692471	0.00177684	0.000572418	0.000294837	0.00102667	0.00103358	0.00117726	0.00161583	0.000504136	0.00190045	0.00232815	0.00205394	0.0973952	0.000907207	0.000203062	0.000165782	0.00105607	0.00159235	0.00129672	0.0014366	0.00102303	0.00267536	0.00155513	0.0022892	0.00135067	0.000159349	0.00276952	0.00320261	0.090393	0.000589069
Propylene glycol	Alcohol	7.84	10	8.732	0.00960667	0.0112494	0.0117414	0.0147856	0.0154594	0.0142224	0.0156991	0.0229218	0.0163199	0.0139082	0.0126459	0.0131608	0.0105095	0.0106094	0.0241459	0.015859	0.0205414	0.011165	0.0109108	0.0133719	0.0114751	0.00967089	0.01221	0.0106139	0.0119862	0.0113807	0.0153007	0.0138547	0.0149815	0.012958	0.00803099	0.0194459	0.0166788	0.015254	0.0154545	0.011725	0.0165316	0.0220445	0.0217349	0.0256143	0.0113193	0.0189609	0.0166799	0.0320688	0.0166758
1,3 Propanediol	Alcohol	5.94	11	9.704	0.0217126	0.0287156	0.0303177	0.00921566	0.00947164	0.00882007	0.0375163	0.0365874	0.0287335	0.00998154	0.00814009	0.0137817	0.0330036	0.0439012	0.0115529	0.00874319	0.0113165	0.0409091	0.0356092	0.0403818	0.00874976	0.00824052	0.00885561	0.034861	0.0258152	0.0281959	0.0124378	0.00939803	0.031305	0.0280675	0.0247811	0.0091146	0.0118768	0.00978734	0.0506425	0.0392611	0.042623	0.0193486	0.0202028	0.0185527	0.0290489	0.0448077	0.0411837	0.0136794	0.0186366
1,4-Butanediol	Alcohol	207.65	16	10.535	0.176512	0.145171	0.193871	0.407087	0.586611	0.284366	0.134702	0.160987	0.167561	0.425123	0.384471	0.257533	0.269465	0.148441	0.482156	0.37483	0.495326	0.302558	0.315743	0.351663	0.535694	0.385835	0.411051	0.166893	0.145927	0.207156	0.276761	0.182536	0.151122	0.229857	0.179365	0.406679	0.468106	0.312946	0.0151266	0.0269897	0.0358478	0.0894794	0.0791814	0.120365	0.0125967	0.0457006	0.0557031	0.0653436	0.0972586
1-Hexadecanol	Alcohol	493.83	76	21.688	0.010688	0.0143981	0.0203077	0.0789652	0.0303733	0.179759	0.0079046	0.00933158	0.008056	0.0632802	0.0704191	0.091447	0.0109246	0.0117366	0.0132743	0.0122125	0.0115717	0.00818281	0.0109878	0.0157669	0.0330831	0.0491136	0.0478689	0.0180876	0.0155668	0.019481	0.102143	0.145479	0.0160788	0.012867	0.0117481	0.0288361	0.0226373	0.0598343	0.0402714	0.0311592	0.0388807	0.00978314	0.166272	0.0140668	0.0254001	0.0254478	0.0167608	0.0126348	0.0287781
Octadecan-1-ol	Alcohol	261.37	83	23.619	0.0084877	0.0117468	0.0162898	0.0476454	0.0189809	0.109091	0.00671781	0.00880378	0.00727719	0.0387789	0.0447521	0.0629845	0.0129158	0.0139847	0.0103137	0.0101546	0.00976431	0.0110695	0.0106812	0.0149419	0.0200997	0.0280644	0.0268937	0.0145599	0.0115587	0.0148214	0.0579975	0.0817244	0.0130316	0.010414	0.00957391	0.0190439	0.0165327	0.0371077	0.0300881	0.0221648	0.0251083	0.00891411	0.0939035	0.0112149	0.0207489	0.020344	0.0142506	0.00907538	0.0199529
Nonane	Aliphatic hydrocarbon	72.57	4	6.751	0.059166	0.0752756	0.0734889	0.0636347	0.0819028	0.0559873	0.107096	0.102096	0.0966525	0.0731355	0.0635488	0.149363	0.0954839	0.120463	0.0854524	0.0577858	0.0956295	0.103194	0.107582	0.106822	0.0826673	0.0567939	0.07611	0.0901986	0.0730929	0.0766844	0.0685865	0.0657026	0.0815876	0.0661128	0.0608418	0.0570181	0.0888765	0.0587611	0.128537	0.121601	0.121747	0.136315	0.141857	0.136624	0.0055502	0.101197	0.115492	0.128724	0.0184783
l-Alanine	Amino acid	59.49	6	7.757	0.00249066	0.00332237	0.00560253	0.00561461	0.0043702	0.00652752	0.157628	0.19886	0.152004	0.00564529	0.00799514	0.00168214	0.00231367	0.00446332	0.00511116	0.00288091	0.00668766	0.00350811	0.00330863	0.00476188	0.00347693	0.00396631	0.00360396	0.00319711	0.00281172	0.00219053	0.00733145	0.00841427	0.00417914	0.00301406	0.0023382	0.00445555	0.0043837	0.00425312	0.00811455	0.00180044	0.0126097	0.00296036	0.034136	0.00293331	0.00195709	0.0277407	0.00170265	0.160999	0.0024479
L-Valine	Amino acid	25.84	15	10.23	0.0028571	0.00296265	0.00641925	0.00922763	0.00651241	0.0091182	0.0162231	0.0183071	0.0243703	0.0144596	0.0201752	0.00875895	0.0118349	0.0135892	0.0122221	0.00821545	0.0115213	0.0137222	0.0197145	0.0487557	0.00838963	0.00773474	0.00720674	0.00643383	0.00751135	0.00943761	0.0110761	0.00941977	0.0203604	0.0117874	0.0144548	0.0123294	0.00752556	0.0130408	0.0014543	0.00183695	0.00100193	0.00304966	0.00348778	0.00309576	0.0125375	0.00434373	0.00239041	0.0371973	0.0441231
Valine	Amino acid	800.19	21	12.387	0.18305	0.159325	0.252319	0.356635	0.364163	0.273502	0.308269	0.35762	0.211983	0.558363	0.610727	0.437671	0.349317	0.31943	0.484521	0.351742	0.493566	0.344126	0.331761	0.368784	0.384133	0.364793	0.379594	0.234321	0.18571	0.245477	0.325152	0.218745	0.27322	0.247184	0.259733	0.556027	0.457661	0.452776	0.0227303	0.0190094	0.028891	0.0956752	0.105264	0.0986417	0.00308091	0.0686548	0.0579631	0.166144	0.0265542
l-Leucine	Amino acid	623.02	24	13.255	0.0700159	0.0475344	0.0777495	0.193911	0.197252	0.141778	0.120438	0.132581	0.143034	0.385079	0.425791	0.310265	0.126187	0.100402	0.245513	0.18402	0.251495	0.17731	0.189142	0.199757	0.207491	0.161046	0.224899	0.094061	0.0670416	0.096711	0.216944	0.148496	0.0526158	0.0695467	0.0390922	0.285519	0.198703	0.176943	0.00694562	0.00723583	0.0105381	0.033948	0.0391688	0.0388207	0.00150354	0.0284735	0.0206678	0.047233	0.00357653
Leucine	Amino acid	134.16	26	13.535	0.011051	0.0129781	0.0165484	0.0264791	0.0266621	0.0243149	0.0215565	0.0223758	0.0231376	0.0121141	0.0134558	0.0107674	0.0250055	0.0230893	0.013178	0.00978663	0.0133807	0.0230191	0.027284	0.0343223	0.011657	0.0127355	0.00990159	0.0134975	0.0128194	0.0173376	0.0154093	0.0119056	0.0161673	0.0137356	0.0161231	0.0231227	0.0221838	0.0224222	0.0139759	0.0112585	0.0127481	0.00497861	0.00875585	0.00697619	0.0114185	0.0156008	0.0101605	0.00736774	0.00395461
Isoleucine	Amino acid	398.54	27	13.587	0.0448458	0.0305525	0.0468389	0.142786	0.156561	0.121997	0.0817491	0.0936723	0.104595	0.225136	0.245806	0.184124	0.107968	0.0679375	0.179974	0.130175	0.182329	0.128567	0.142544	0.151779	0.138719	0.121312	0.136331	0.0560088	0.0450477	0.0632952	0.148125	0.103024	0.0329146	0.0472698	0.0302234	0.22503	0.165221	0.147918	0.00427863	0.00474011	0.00617957	0.0180735	0.0208573	0.0193209	0.000649728	0.0110771	0.00896107	0.0153027	0.00490139
beta-Alanine	Amino acid	11.3	30	14.472	0.00279045	0.00279971	0.0034275	0.00820774	0.00791967	0.00802125	0.00476472	0.00443672	0.00473325	0.00366509	0.00423042	0.00596791	0.00599094	0.00619153	0.00550667	0.00490737	0.00587461	0.00489839	0.0045183	0.00616831	0.00556299	0.00568555	0.00508185	0.00347251	0.0026198	0.00386817	0.00353887	0.0038523	0.00497873	0.00355838	0.00391489	0.00242429	0.00295012	0.00271977	0.0128258	0.0126282	0.0116197	0.00569906	0.00610646	0.00642547	0.00685455	0.00823442	0.00690422	0.00548138	0.0041147
Serine	Amino acid	36.64	31	14.591	0.00609092	0.00539544	0.00584902	0.0324506	0.0409497	0.028036	0.0162032	0.0148233	0.0189751	0.0339399	0.0381707	0.0155803	0.0151181	0.00566185	0.0392267	0.0240542	0.0368132	0.0225303	0.0230602	0.0158511	0.0218616	0.0178885	0.0201931	0.00832724	0.00601841	0.00883166	0.0302655	0.0260264	0.00507414	0.00758697	0.00380427	0.0189358	0.0179468	0.0165744	0.00121899	0.00197842	0.002188	0.00743487	0.00783654	0.00792986	0.000313798	0.0026422	0.00303299	0.00363758	0.000663526
L-Threonine	Amino acid	53.7	33	14.981	0.00741959	0.00816787	0.0117923	0.00669199	0.00842399	0.00774767	0.00886592	0.00963749	0.00579425	0.0087756	0.00767134	0.012664	0.00478648	0.00867272	0.00700692	0.00497137	0.00766344	0.0187437	0.017174	0.0229466	0.0073109	0.00693008	0.00671393	0.0230597	0.0118616	0.016546	0.00890851	0.00817882	0.0126998	0.0146087	0.00666339	0.00511439	0.00759756	0.00541868	0.0143382	0.0129903	0.0131137	0.00505998	0.00868517	0.00928768	0.000457971	0.0125277	0.0210646	0.000968773	0.00128413
Glycine	Amino acid	1035.08	34	15.063	0.164266	0.192204	0.198869	0.363044	0.392507	0.316351	0.301253	0.291936	0.339133	0.405063	0.372201	0.812793	0.308594	0.39659	0.387647	0.270265	0.442276	0.348902	0.360588	0.358071	0.412066	0.355935	0.36957	0.26832	0.210974	0.214983	0.416877	0.407209	0.234993	0.231401	0.169216	0.27608	0.425457	0.392652	0.332827	0.328573	0.327525	0.587829	0.603762	0.574879	0.117633	0.374241	0.319947	0.572422	0.318609
Homoserine	Amino acid	15.86	36	16.118	0.00584642	0.0036834	0.00491372	0.0122386	0.013597	0.0101385	0.0102185	0.00919311	0.00999289	0.0222433	0.032128	0.00196306	0.00478164	0.00233582	0.0201751	0.0103109	0.0169565	0.00819476	0.00920314	0.00971688	0.00814035	0.00799843	0.00804225	0.00341185	0.00424252	0.00571221	0.0122192	0.00664318	0.00402235	0.0048177	0.00399662	0.0124255	0.00496424	0.00752779	0.000682626	0.000580861	0.000573066	0.00214192	0.0022666	0.00190953	0.000887013	0.00114844	0.000832102	0.0215836	0.00503633
Aspartate	Amino acid	120.05	37	16.158	0.00635806	0.008007	0.00983896	0.0166874	0.0197178	0.0141916	0.0201789	0.0151634	0.0166297	0.0235489	0.0250431	0.0119486	0.0119143	0.00865465	0.0232253	0.0140015	0.0204215	0.0131967	0.0177896	0.0221652	0.0224263	0.0198698	0.0184642	0.00988722	0.0101349	0.0132569	0.0257601	0.0206766	0.0167507	0.0120242	0.0128577	0.0183879	0.0197818	0.0210395	0.00313712	0.00297097	0.0032212	0.00402499	0.00505138	0.00383276	0.00929285	0.00863599	0.00624907	0.0158186	0.0145235
DL-Phenylalanine	Amino acid	81.22	39	17.088	0.00660716	0.00720003	0.0132395	0.0123415	0.00632068	0.00967875	0.0246609	0.0315923	0.0244864	0.0146513	0.0239144	0.00573508	0.0198814	0.0216832	0.00906823	0.00745697	0.00972294	0.02048	0.0232393	0.03465	0.0067988	0.00685803	0.0046521	0.01465	0.0221511	0.0202573	0.0102528	0.00881622	0.0197173	0.0201531	0.0188412	0.0169423	0.0105195	0.019341	0.00110133	0.00102091	0.00132339	0.00126155	0.00163815	0.00128354	0.00185149	0.00317075	0.00178581	0.010617	0.00373942
2-Aminoadipic acid	Amino acid	23.52	58	19.871	0.0895482	0.0870509	0.110726	0.0102693	0.00705679	0.00624792	0.00340856	0.00279137	0.060529	0.0130397	0.0187576	0.00221937	0.0529087	0.0519714	0.00770856	0.00518304	0.0046395	0.0565504	0.0504344	0.0661549	0.00380486	0.0053056	0.0048221	0.0569116	0.0717062	0.0813015	0.00314922	0.00218464	0.0619941	0.0782746	0.00226068	0.00922728	0.00221868	0.00312759	0.00202148	0.0011288	0.0100923	0.00744054	0.0103266	0.00746017	0.000625699	0.0014203	0.00872743	0.0294291	0.0141331
Phenylalanine	Amino acids	66.52	47	18.118	0.0254803	0.0140084	0.0201089	0.0615135	0.0707686	0.0542877	0.0356493	0.0433905	0.0385374	0.0701993	0.0990766	0.061293	0.0460853	0.0291013	0.0746848	0.0505871	0.0737562	0.0367049	0.0417531	0.0481801	0.048047	0.0401081	0.0413159	0.0191671	0.0147894	0.0209681	0.042369	0.0284951	0.0110953	0.0167615	0.00916355	0.0855167	0.0586683	0.0525451	0.00180456	0.00166696	0.00813526	0.00860202	0.00942622	0.00961318	0.000612578	0.00839549	0.00239325	0.0102551	0.00368912
Tyrosine	Amino acids	151.88	75	21.649	0.0552074	0.0538249	0.0846558	0.204926	0.194552	0.151656	0.116024	0.118929	0.0935261	0.182474	0.245239	0.0431374	0.124704	0.100016	0.201308	0.138279	0.198786	0.0947279	0.105111	0.145873	0.102268	0.104504	0.102381	0.0407536	0.0350692	0.0497946	0.124367	0.0891143	0.0158774	0.00898422	0.00149294	0.277264	0.151632	0.170347	0.00654054	0.00585653	0.00737357	0.0110271	0.020001	0.0191942	0.00377586	0.0103239	0.0104788	0.0445554	0.0237199
N-Acetyl-D-glucosamine (isomer 2)	Amino sugar	110.01	82	23.411	0.0203607	0.0306942	0.036558	0.0492872	0.0506006	0.0573195	0.0320136	0.0400425	0.0378806	0.0440976	0.0386415	0.036491	0.0371801	0.0347779	0.0615549	0.0463767	0.0593682	0.0438852	0.0445201	0.0551344	0.055764	0.0541505	0.0496524	0.0390347	0.0376585	0.0482881	0.0273813	0.0210399	0.0427629	0.0428296	0.0448337	0.077812	0.0753552	0.0716884	0.00654667	0.00581693	0.00710372	0.0116362	0.0173989	0.0147454	0.00897305	0.0126504	0.00791148	0.0100725	0.01009
Ethylbenzene	Aromatic hydrocarbon	43.83	1	6.171	0.0199555	0.0233551	0.00114631	0.0134256	0.0140862	0.00120804	0.000986845	0.00126989	0.0013983	0.016109	0.0127139	0.0249425	0.0312899	0.0430476	0.0153809	0.0109632	0.0178778	0.0334535	0.0306145	0.0330107	0.0156814	0.0124086	0.0143133	0.0286838	0.0223096	0.024502	0.0157453	0.0166488	0.0261026	0.0215759	0.018208	0.0107748	0.0181447	0.0134418	0.0416533	0.0382006	0.0433083	0.0191355	0.00115493	0.0198273	0.00936842	0.0426901	0.0383198	0.00144868	0.00390151
p-Xylene	Aromatic hydrocarbon	4440.95	2	6.362	0.168898	0.200857	0.206526	2.45447	2.91877	0.476789	0.0372624	0.0371835	0.0661091	0.780124	0.580133	5.24848	0.269687	0.344615	0.572274	2.15153	0.566288	0.301755	0.307103	0.322512	3.14619	2.27397	0.664461	0.251273	0.21447	0.222868	2.72802	0.695195	0.256605	0.205947	0.177675	0.654093	0.547725	2.55594	0.382937	0.364593	0.340308	0.779807	0.44668	4.32045	0.365873	0.340419	0.357926	3.89788	4.83328
Tributyl acetylcitrate	Esters	791.46	90	24.645	0.000392774	0.000319446	0.00030149	0.130749	0.00165259	0.162424	0.000407474	0.00035867	0.000390168	0.0905415	0.114347	0.206459	0.000400127	0.000612427	0.00165061	0.00183128	0.00173269	0.000491035	0.000520521	0.000443684	0.00188443	0.0199111	0.00150769	0.000307148	0.000421003	0.000292804	0.225825	0.250151	0.000404258	0.000383076	0.00160949	0.00212232	0.00238729	0.107441	0.000501795	0.000506542	0.00051024	0.0023917	0.335458	0.00428696	0.000527371	0.000620582	0.000337597	0.00402864	0.0587412
Myristic acid	Fatty acids/esters	143.17	64	20.522	0.0117991	0.0166007	0.0162801	0.315295	0.0517863	0.0497199	0.208729	0.193039	0.192605	0.33873	0.295131	0.513183	0.226296	0.273131	0.249907	0.187224	0.399111	0.245464	0.226352	0.22872	0.279236	0.244934	0.310568	0.26079	0.198331	0.234642	0.280883	0.292653	0.211523	0.165554	0.199509	0.214817	0.331062	0.27646	0.38248	0.315299	0.381847	0.37333	0.434471	0.430708	0.28616	0.370208	0.34821	0.351484	0.32548
Pentadecanoic acid ester	Fatty acids/esters	21.28	74	21.566	0.0153143	0.0238431	0.0238016	0.0407991	0.0453272	0.0436299	0.0224665	0.0233509	0.023796	0.03234	0.0297834	0.0410399	0.0332231	0.0372501	0.0222775	0.0173496	0.0234431	0.0322877	0.0321773	0.0360747	0.0276626	0.0309301	0.0317816	0.0298886	0.0282408	0.0336216	0.0370114	0.0347353	0.0270305	0.020277	0.0250023	0.047613	0.0512861	0.0499319	0.0330936	0.0250443	0.0329081	0.017856	0.0273008	0.021439	0.0209075	0.0273951	0.0242822	0.0153826	0.0166967
Palmitic acid	Fatty acids/esters	253.75	80	22.564	0.489653	0.595557	0.526124	0.703224	0.633071	0.61636	0.501302	0.564125	0.543325	0.517954	0.43614	0.946254	0.516072	0.627761	0.456772	0.340894	0.511342	0.546427	0.475191	0.463046	0.433781	0.476041	0.454952	0.525045	0.493154	0.478641	0.461929	0.480515	0.526212	0.443155	1.62163	0.598473	0.776752	0.801796	0.639854	0.47999	0.589143	0.500277	0.647905	0.559351	0.397849	0.509048	0.48318	0.352837	0.371931
Linoleic acid	Fatty acids/esters	341.73	85	24.183	0.478433	0.414948	0.453733	0.375365	0.286772	0.362082	0.356267	0.451694	0.363561	0.259868	0.234742	0.299217	0.397591	0.434376	0.312824	0.294396	0.328686	0.425134	0.342725	0.446846	0.292493	0.298669	0.316918	0.251829	0.260098	0.289751	0.323907	0.330939	0.425876	0.390895	0.713171	0.596294	0.612044	0.563958	0.470948	0.373906	0.347034	0.201829	0.239143	0.216339	0.323401	0.3568	0.297618	0.158539	0.141437
9-Octadecenoic acid ester	Fatty acids/esters	1210.24	86	24.217	0.429097	0.306317	0.321495	0.228042	0.179069	0.222373	0.272203	0.327387	0.293927	0.159442	0.140437	0.290546	0.339873	0.386258	0.175611	0.163567	0.183449	0.322525	0.30246	0.328843	0.165946	0.175979	0.178275	0.236024	0.225161	0.232874	0.164395	0.173334	0.310762	0.258956	1.21259	0.339436	0.336993	0.309957	0.38576	0.293565	0.274462	0.174711	0.205452	0.170167	0.23572	0.280493	0.230187	0.113216	0.114259
trans-13-Octadecenoic acid	Fatty acids/esters	36.58	87	24.284	0.0899519	0.0788662	0.0758994	0.0751639	0.0867699	0.0794795	0.0514464	0.0600419	0.0559769	0.0543073	0.0524867	0.109579	0.0698919	0.0877255	0.0555373	0.0445379	0.0565405	0.0748821	0.0744655	0.0800506	0.0438081	0.0453666	0.0487209	0.0595084	0.0533319	0.0586688	0.0287448	0.0287285	0.0641293	0.0596342	0.25967	0.0866056	0.0920394	0.0875134	0.107475	0.0825573	0.0884897	0.0618412	0.0728156	0.0618952	0.0498917	0.070447	0.055643	0.0352018	0.034794
Oleic acid	Fatty acids/esters	137.6	88	24.339	0.00741436	0.0134054	0.0232585	0.00364873	0.00427758	0.00410271	0.00626034	0.00658258	0.00450452	0.00250238	0.00253334	0.00279105	0.00253541	0.00202135	0.00463006	0.00489984	0.00487761	0.00378625	0.00608181	0.00660491	0.00899381	0.0111173	0.00732887	0.00346045	0.00465061	0.00516858	0.003945	0.00106845	0.00768362	0.0107288	0.0111457	0.0312117	0.0337029	0.0281853	0.00357676	0.00185911	0.000935065	0.00509075	0.0107231	0.00275238	0.05905	0.0357468	0.0399331	0.0486596	0.0355559
Stearic acid	Fatty acids/esters	87.27	89	24.434	0.211218	0.146306	0.134868	0.228445	0.187691	0.192966	0.149199	0.166597	0.162122	0.194152	0.152386	0.462097	0.164368	0.220879	0.135872	0.0836719	0.151692	0.180101	0.166238	0.155896	0.131685	0.135711	0.135031	0.189637	0.162459	0.157221	0.145809	0.173995	0.167323	0.138167	0.848902	0.157962	0.215816	0.307379	0.20699	0.159674	0.20378	0.190028	0.27007	0.208352	0.132106	0.190709	0.168069	0.140237	0.142637
Arachidonic acid	Fatty acids/esters	16.01	91	25.615	0.00661393	0.00944751	0.0112323	0.015004	0.0114705	0.0123208	0.00974016	0.0100682	0.00914292	0.00905483	0.0131406	0.0092973	0.0191468	0.0216992	0.0117578	0.00831727	0.0129022	0.016498	0.0126051	0.0165467	0.00827545	0.00913037	0.00991471	0.00571723	0.00618317	0.00652276	0.00913758	0.00884211	0.0167498	0.0123498	0.0234351	0.0177282	0.0136113	0.0131805	0.00739122	0.00457387	0.00482312	0.00517496	0.00597224	0.00363377	0.00501255	0.00879961	0.00458472	0.00529692	0.00539464
Eicosanoic acid	Fatty acids/esters	50.35	93	26.157	0.0121666	0.00954715	0.00923275	0.00585748	0.00589671	0.00481473	0.00900631	0.00958933	0.0094808	0.00401668	0.00343835	0.0178865	0.0095926	0.0131071	0.00384053	0.00264456	0.0037889	0.0104121	0.00960297	0.00827352	0.0042926	0.00404976	0.00346774	0.00965575	0.00876638	0.00797587	0.0030597	0.00332454	0.00821472	0.00688734	0.069488	0.0050622	0.00680717	0.00792642	0.0103843	0.00705378	0.00847797	0.00713072	0.00742691	0.00831534	0.00544317	0.00729972	0.00814976	0.00428574	0.00497085
1-Monopalmitin	Fatty acids/esters	1972.91	94	27.414	0.0382928	0.0528539	0.0552241	0.130313	0.0840114	0.0966651	0.0969388	0.0882654	0.0816808	0.123155	0.118385	0.182344	0.127056	0.136086	0.101932	0.0826341	0.128483	0.103242	0.0978138	0.102627	0.0968051	0.112397	0.103037	0.109504	0.0864998	0.08306	0.140272	0.142773	0.109652	0.0843041	0.165291	0.0958166	0.122827	0.10183	0.208202	0.185739	0.214105	0.158411	0.221023	0.187152	0.185658	0.223684	0.179318	0.186048	0.229227
9-Octadecenoic acid, -2-propyl ester	Fatty acids/esters	46.89	97	28.452	0.0169718	0.0173585	0.0197818	0.00770611	0.00548825	0.0104662	0.0158973	0.0184956	0.0134019	0.00457931	0.0035932	0.00607437	0.0118345	0.0146962	0.00781958	0.00660412	0.0077064	0.0157434	0.0206388	0.0192097	0.00738171	0.00784798	0.00854615	0.00988312	0.0104467	0.0132979	0.0107017	0.00971808	0.0191396	0.0232693	0.0468331	0.0151979	0.0177556	0.0213854	0.115969	0.0833908	0.0834798	0.0263528	0.0300128	0.0272243	0.174025	0.105017	0.0616777	0.049636	0.0786324
1-Monooleoylglycerol	Fatty acids/esters	144.36	99	28.722	0.0663916	0.0549373	0.0632151	0.0376912	0.0204178	0.0362515	0.0680846	0.106927	0.0629865	0.0234598	0.01862	0.0250787	0.043525	0.0505051	0.0516491	0.0486343	0.0520631	0.0621541	0.0597736	0.0569769	0.0308117	0.0309768	0.0358868	0.0278501	0.0397985	0.0490989	0.0666342	0.0571798	0.0623617	0.0799926	0.216522	0.0838769	0.0794781	0.0756071	0.660025	0.525119	0.46779	0.21159	0.231574	0.211195	0.565944	0.547217	0.425754	0.231468	0.23912
Stearic acid, 2,3-propyl ester	Fatty acids/esters	1471.38	101	28.882	0.0180303	0.0263109	0.0290119	0.120558	0.0448327	0.116268	0.051164	0.0399171	0.0393256	0.0921924	0.098043	0.165377	0.0691285	0.0708246	0.0535513	0.0428937	0.0637749	0.055356	0.0515334	0.0525206	0.0535147	0.0705024	0.059835	0.0568303	0.0477128	0.0415007	0.136494	0.19967	0.0526597	0.0469183	0.0748605	0.0453777	0.0665171	0.0718474	0.0865004	0.0885927	0.0997473	0.0775355	0.18124	0.0932394	0.0754254	0.110497	0.085898	0.0853844	0.128464
Uracil	Nitogenous	687.57	29	14.254	0.0522273	0.0632739	0.074908	0.167964	0.198465	0.170504	0.108982	0.0979431	0.113796	0.0825386	0.081765	0.0694329	0.153815	0.15112	0.0823124	0.0659605	0.0836781	0.155919	0.172066	0.255639	0.0864709	0.0898798	0.0724727	0.0732172	0.0640054	0.0869973	0.143752	0.113582	0.0928869	0.0752603	0.0746169	0.148401	0.14771	0.152461	0.000220334	0.000198347	0.00023889	0.00648314	0.0109147	0.00920606	0.0133044	0.0226869	0.000178297	0.0102893	0.00515889
Adenosine	Nitogenous	64.53	96	27.976	0.00150986	0.0018238	0.00295555	0.00360487	0.00385372	0.0040613	0.00240975	0.00237802	0.00231744	0.00157787	0.00118996	0.000760219	0.00107606	0.000308106	0.00191751	0.00163459	0.00193405	0.00385669	0.00404856	0.0047866	0.00182478	0.00239605	0.00173785	0.00340605	0.00313686	0.0032913	0.00335538	0.00318704	0.00456916	0.00274631	0.00156003	0.00403145	0.00484757	0.00519747	0.00709495	0.00628973	0.00722608	0.00572833	0.00881128	0.00859755	0.0154158	0.01564	0.0113907	0.0169186	0.0179116
m-Hydroxybenzoic acid	Phenolic acid	42.77	41	17.283	0.0667017	0.0531873	0.0364127	0.00528483	0.00422143	0.00434615	0.0980847	0.160538	0.287721	0.00386377	0.00331198	0.00323345	0.29986	0.469285	0.00453193	0.00330122	0.00539021	0.212916	0.217261	0.168236	0.00428916	0.00583692	0.00380302	0.067072	0.102878	0.0381569	0.00691465	0.00708831	0.0603363	0.0283522	0.0235974	0.00355778	0.00247935	0.00398871	0.0744548	0.169423	0.307471	0.0119188	0.0121532	0.0110596	0.25228	0.369021	0.050886	0.0161146	0.0104374
protocatechuic acid	Phenolic acid	364.14	50	18.384	0.000250365	0.000517749	0.000574165	0.0908062	0.00592033	0.153564	0.0016848	0.00069066	0.000785494	0.0559621	0.072098	0.117512	0.000506853	0.000846903	0.00322966	0.00592629	0.00521548	0.00101966	0.000600578	0.000620223	0.00535886	0.0277821	0.00276737	0.000793303	0.000505469	0.000391629	0.107152	0.201664	0.000499783	0.001564	0.000554532	0.00198433	0.00543341	0.100873	0.00078479	0.000592922	0.00100492	0.00581102	0.181161	0.00860152	0.00177687	0.0141866	0.000802785	0.00798042	0.013624
4-Hydroxyhydrocinnamic acid	Phenolic acid	111.28	56	19.639	0.00611356	0.00481712	0.00631339	0.00730067	0.00507227	0.00587257	0.00720292	0.00861859	0.00787299	0.00541297	0.00708717	0.00639778	0.00264686	0.00400297	0.00641492	0.00478824	0.00642187	0.00520448	0.00588659	0.00687266	0.0100393	0.00938294	0.00950013	0.0103605	0.0086803	0.0074231	0.00703992	0.00498339	0.0060502	0.00600141	0.00802927	0.0148734	0.0104578	0.00941994	0.0145594	0.0135761	0.0146124	0.00831656	0.00827862	0.00825119	0.0198592	0.018514	0.0228854	0.0351826	0.0224535
Benzenepropanoic acid, 4-hydroxy-3-methoxy	Phenolic acid	65.51	70	21.142	0.0087101	0.00650614	0.00982238	0.00887122	0.00756041	0.00751829	0.0100326	0.0159384	0.0125307	0.002366	0.0025101	0.0020362	0.00195001	0.00305336	0.00790448	0.00760522	0.00800236	0.00633794	0.00500626	0.00576624	0.00193493	0.00228953	0.00344332	0.010113	0.0163712	0.0155374	0.000749445	0.000670851	0.0106292	0.0135027	0.0160918	0.0058481	0.00704926	0.00634859	0.00315312	0.00417376	0.00273549	0.0054304	0.00589402	0.00361589	0.00463283	0.000371565	0.00497242	0.0127245	0.00694087
Hydrocaffeic acid	Phenolic acid	140.91	77	21.901	0.013576	0.0147855	0.0218569	0.0189617	0.0161327	0.0142821	0.0198845	0.0352921	0.0304643	0.00898456	0.00681175	0.00525444	0.00557105	0.00625484	0.0131015	0.0132791	0.0123667	0.0177856	0.0175286	0.0294044	0.0172112	0.0152218	0.0146688	0.00495931	0.00606041	0.00502282	0.0045176	0.00118287	0.0216744	0.0192465	0.0242758	0.0534297	0.0407873	0.0401414	0.00377479	0.0035841	0.00207117	0.00670706	0.00758393	0.00281276	0.0467291	0.0434024	0.0266935	0.0346895	0.0248808
Coprostanol	Sterol	1133.02	103	31.14	0.0504574	0.0783994	0.0977871	0.0777254	0.115714	0.105151	0.0303441	0.0352879	0.0329373	0.0691876	0.0667601	0.0617766	0.0474083	0.0537785	0.0437298	0.0468122	0.037574	0.0194286	0.0294573	0.0365522	0.116844	0.154101	0.216509	0.0807794	0.0721268	0.0788572	0.020345	0.0144531	0.0758412	0.0567857	0.0453765	0.0868027	0.0618594	0.0631307	0.199518	0.14847	0.171151	0.0313586	0.0705936	0.0532726	0.106023	0.114759	0.0825893	0.0297272	0.053415
L-Threonic acid	Sugar acid	36.03	40	17.148	0.0264012	0.0232109	0.0233386	0.154147	0.12129	0.075701	0.0939811	0.0672818	0.0970447	0.0849717	0.125313	0.0552956	0.0928416	0.0600345	0.0802466	0.0626807	0.102638	0.132415	0.108295	0.0901715	0.0782688	0.0630332	0.0512275	0.049343	0.0541038	0.0718704	0.112174	0.121397	0.00993609	0.0170085	0.022042	0.0414453	0.0163111	0.00680347	0.00551498	0.00818975	0.00756713	0.00979825	0.00920605	0.00999509	0.00669615	0.00636262	0.0131244	0.00414435	0.0034919
Ribonic acid	Sugar acid	51.65	60	20.05	0.00271812	0.00281237	0.00309993	0.00758286	0.00508952	0.00499534	0.00648874	0.00491961	0.00565521	0.00456983	0.00727231	0.00389212	0.00696257	0.00721872	0.00479399	0.00393329	0.00546717	0.00702069	0.00636559	0.00693945	0.00432302	0.0041811	0.00425032	0.00442195	0.00424661	0.00553679	0.00716213	0.00815459	0.0030654	0.00209898	0.00282902	0.00299552	0.00217019	0.00152208	0.00276762	0.0026569	0.00277947	0.00468861	0.004269	0.00559394	0.00260887	0.0033284	0.00404339	0.00250124	0.00229439
L-Threitol	Sugar alcohol	7.42	38	16.674	0.00281192	0.00287545	0.00360281	0.00375226	0.00383508	0.00449881	0.0081221	0.010407	0.0102208	0.0022006	0.00229849	0.00258103	0.00275231	0.00322006	0.00505272	0.00384829	0.00508608	0.00399929	0.00451188	0.00521597	0.00332864	0.00258162	0.00255895	0.00509496	0.00798328	0.00738282	0.00214999	0.00209259	0.0043676	0.00392749	0.00511597	0.00469776	0.00357903	0.00454817	0.00112125	0.00112701	0.00131591	0.0117174	0.00939223	0.00850162	0.00233412	0.00181658	0.00238218	0.00984466	0.00553098
Pinitol	Sugar alcohol	87.67	65	20.643	0.210381	0.124882	0.195849	0.0533038	0.0373997	0.0205527	0.43585	0.614459	0.447542	0.00912222	0.0160485	0.00751541	0.0411398	0.0439965	0.202982	0.125986	0.211737	0.00753635	0.0073902	0.00869534	0.018267	0.0187119	0.0399422	0.112541	0.318561	0.334963	0.0130911	0.00901088	0.00808155	0.00661837	0.0068787	0.0280723	0.0260881	0.0264477	0.0183245	0.0153368	0.0185499	0.504439	0.43025	0.358571	0.0193474	0.0140873	0.010441	0.0160075	0.00823738
1,5-Anhydro-D-sorbitol	Sugar alcohol	38.47	67	20.8	0.00334638	0.00326202	0.00429578	0.0110613	0.0107245	0.00972379	0.00788439	0.00687473	0.00606589	0.0139998	0.0161914	0.00474382	0.00849448	0.00482183	0.0107216	0.00803801	0.0114298	0.0102403	0.0112981	0.0117426	0.0071581	0.00661061	0.00656404	0.004015	0.00332166	0.0049108	0.00913027	0.00727593	0.000216938	0.000299355	0.000227546	0.0137471	0.00750636	0.00734572	0.00108038	0.000894924	0.000981886	0.00082316	0.00171366	0.0011195	0.000495596	0.00137155	0.00129804	0.00231745	0.000711035
Ribitol	Sugar alcohol	138.27	68	20.915	0.183817	0.220646	0.265791	0.17088	0.160467	0.178435	0.241792	0.230673	0.231432	0.136974	0.141128	0.0983418	0.163878	0.151133	0.238001	0.173939	0.243841	0.258587	0.224281	0.225788	0.1478	0.133294	0.13079	0.109771	0.130201	0.15638	0.427663	0.310638	0.136489	0.187677	0.161748	0.21091	0.165392	0.158532	0.0276476	0.0344234	0.0357863	0.0744058	0.0633718	0.0685933	0.0137793	0.024406	0.0213651	0.0280694	0.0204913
Myoinositol-1	Sugar alcohol	217.81	69	20.951	0.00189172	0.00211345	0.00243366	0.00194142	0.00190926	0.00202312	0.00270861	0.00272739	0.00268065	0.0015707	0.0015329	0.00123818	0.00191635	0.00192708	0.00269725	0.00186759	0.00243676	0.00263062	0.0027557	0.00224526	0.00218658	0.00174001	0.00233546	0.00132942	0.00187299	0.00177955	0.00445033	0.00318859	0.00176117	0.00202459	0.00172746	0.000182134	0.00219	0.0021871	0.000796198	0.000857764	0.000669549	0.00165274	0.0013697	0.00133816	0.00100732	0.000995215	0.00116342	0.00100188	0.00100627
Myoinositol-2	Sugar alcohol	133.2	78	21.962	0.0306322	0.018483	0.0289802	0.0233414	0.0164748	0.00519111	0.0499466	0.0743718	0.0553099	0.00251636	0.00272428	0.00230347	0.011116	0.00950328	0.0290894	0.0181523	0.0308206	0.0025233	0.00268505	0.00273794	0.00284399	0.00376963	0.00662581	0.0176216	0.0421386	0.0439993	0.00176742	0.00184036	0.00302798	0.00200679	0.00224725	0.00421037	0.0049928	0.00538972	0.00277563	0.00275567	0.00277992	0.0290464	0.0251306	0.0223833	0.0166958	0.021108	0.00220044	0.00292034	0.00182669
Myoinositol-3	Sugar alcohol	228.82	81	23.315	0.000413427	0.000684184	0.000744221	0.0712291	0.00448783	0.110259	0.00153458	0.000948647	0.000817852	0.0377967	0.0495042	0.082292	0.000595473	0.00113454	0.00284876	0.00450161	0.0047515	0.00130587	0.000894967	0.00128673	0.00364779	0.0222412	0.00262125	0.00116486	0.000748228	0.000748432	0.0841454	0.131117	0.000853057	0.00152157	0.0010551	0.00168376	0.00457939	0.0704621	0.00117114	0.0007044	0.00143992	0.00518988	0.140193	0.00735511	0.002103	0.0197141	0.00107487	0.00592835	0.0128473
Maltitol	Sugar alcohol	1588.88	102	28.979	0.0418517	0.0281198	0.0599431	0.0107219	0.00382154	0.00840948	0.0170993	0.0205946	0.0189057	0.0110458	0.0135986	0.0160205	0.0130712	0.0117608	0.0119336	0.00669372	0.0113341	0.0110371	0.0128696	0.00634862	0.00868323	0.0096696	0.0208297	0.00935076	0.00875479	0.0102469	0.00533148	0.00507575	0.0160222	0.0147528	0.019849	0.0219328	0.0139021	0.0126145	0.155839	0.119216	0.116338	0.0787829	0.0728472	0.0702446	0.102733	0.139549	0.115172	0.346022	0.422112
Glycerol	Sugars	63.4	25	13.326	0.707634	0.73003	0.948594	0.963009	0.886072	0.95073	0.741532	0.781143	0.754635	0.766168	0.794781	0.838871	0.867051	1.02596	0.914447	0.872952	0.91954	0.887804	0.964967	1.27123	0.916608	1.04313	0.918911	0.666564	0.69393	0.725663	1.14393	0.84172	1.04034	0.846767	1.06904	1.32934	1.19248	1.31559	0.478117	0.348417	0.451266	0.337157	0.318546	0.477729	0.324307	0.456825	0.499708	0.32036	0.224656
Xylulose	Sugars	16.68	44	17.663	0.00234113	0.00214794	0.00272888	0.00314039	0.00240872	0.00290398	0.00364294	0.00586862	0.0053158	0.00179331	0.0021704	0.00205431	0.000573796	0.000758996	0.00402748	0.00346838	0.00392067	0.0019457	0.00165954	0.00190997	0.00287013	0.00305743	0.00231201	0.00224233	0.00317743	0.00304185	0.0113183	0.00841106	0.00472403	0.00409799	0.00465232	0.00332411	0.00259455	0.00296846	0.00275553	0.00329073	0.00302329	0.00345425	0.00429874	0.00373882	0.0125704	0.0102501	0.0112658	0.0151289	0.0120435
Arabinose-1	Sugars	167.28	46	18.041	0.275992	0.224828	0.2735	0.0473595	0.0553711	0.0599474	0.0916539	0.280224	0.338439	0.133536	0.152173	0.0953089	0.389365	0.316816	0.0771362	0.0576994	0.226022	0.349725	0.318777	0.321751	0.157902	0.0418882	0.130659	0.144541	0.182853	0.180086	0.0898895	0.235723	0.116952	0.0516468	0.150798	0.197537	0.140553	0.147209	0.0473214	0.053333	0.107704	0.0381076	0.0391541	0.0812617	0.0297395	0.091464	0.0557691	0.0199069	0.0197066
Arabinose-2	Sugars	75.35	51	18.454	0.450892	0.439719	0.519026	0.373645	0.356035	0.406157	0.461533	0.419997	0.468607	0.253095	0.272834	0.204043	0.361612	0.349198	0.462428	0.388873	0.447657	0.463702	0.421608	0.528004	0.335852	0.366999	0.299888	0.271232	0.339624	0.374719	0.568995	0.500863	0.267602	0.338569	0.298439	0.399572	0.323729	0.344984	0.0725034	0.0838129	0.0888426	0.155595	0.130763	0.14422	0.0901619	0.0961114	0.0922026	0.067309	0.0516794
Ribose	Sugars	48.83	52	18.681	0.15381	0.178712	0.208903	0.342081	0.350382	0.38612	0.263961	0.214265	0.234697	0.193342	0.170863	0.152043	0.217951	0.220822	0.214584	0.16628	0.206948	0.268163	0.296378	0.453909	0.198838	0.201949	0.17545	0.183225	0.177738	0.198495	0.341989	0.28042	0.269714	0.205196	0.161257	0.247827	0.234924	0.288223	0.0327957	0.0385015	0.0485609	0.0309967	0.0478495	0.0386519	0.0670036	0.0685319	0.0401014	0.0374831	0.0317093
Ribofuranose (isomer 2)	Sugars	54.37	53	18.774	0.0699887	0.0730724	0.099382	0.0607491	0.0586279	0.0669782	0.102525	0.10519	0.103311	0.0512703	0.0517602	0.0336174	0.0669709	0.0903331	0.0858616	0.0721667	0.0909499	0.090308	0.0874687	0.113128	0.0582693	0.0567999	0.0478334	0.0482324	0.0597937	0.0644661	0.122356	0.0935898	0.0541603	0.0613438	0.0606796	0.0626597	0.0427228	0.0439688	0.0211551	0.0251218	0.0256518	0.0502286	0.0460057	0.0439059	0.0478927	0.0309193	0.0242962	0.0281648	0.0263145
Arabinose-3	Sugars	64.35	57	19.809	0.862408	0.846133	1.05808	0.534787	0.503802	0.579016	0.567096	0.573039	0.603858	0.43606	0.480297	0.39133	0.514991	0.520162	0.817631	0.810645	0.784295	0.54525	0.496394	0.643447	0.567814	0.692577	0.505395	0.530886	0.691133	0.7765	0.559986	0.46907	0.61735	0.775247	0.816124	0.671795	0.588247	0.64575	0.090549	0.0919395	0.102364	0.123631	0.138863	0.135656	0.119038	0.124582	0.111645	0.0446544	0.0468814
Fructofuranose (isomer 1)	Sugars	35.97	61	20.31	0.0245104	0.0344798	0.0286731	0.0505107	0.0500999	0.0498701	0.0356039	0.0326398	0.0303753	0.0268121	0.0263629	0.0120557	0.059249	0.0717998	0.0274718	0.0227927	0.0293553	0.0429636	0.0523442	0.0748764	0.0172283	0.019599	0.0166656	0.0131423	0.0124134	0.0180343	0.0252108	0.0237005	0.0230328	0.0148245	0.0167078	0.0218255	0.0143823	0.0182953	0.000195133	0.00311243	0.00310228	0.0148218	0.00637009	0.0109297	0.00625004	0.0052389	0.00386884	0.00657972	0.00701034
Glucopyranose-1	Sugars	37.74	62	20.338	0.0684137	0.0930211	0.099277	0.0840265	0.0820988	0.0861945	0.0679701	0.0684927	0.0691733	0.0462926	0.0503003	0.036728	0.0838216	0.0892403	0.0641787	0.0561039	0.0625216	0.0725907	0.0769664	0.106864	0.0360094	0.0464125	0.0294461	0.0373132	0.0384957	0.0417171	0.0763445	0.0605307	0.0766943	0.0711948	0.0835646	0.0714406	0.0639028	0.0590652	0.00927189	0.00940069	0.0110687	0.0138385	0.0142744	0.0139998	0.00707903	0.0116862	0.00925828	0.00951069	0.00756467
Glucose	Sugars	105.05	63	20.385	0.000261368	0.00357503	0.0045181	0.00135029	0.00159968	0.00219221	0.00832909	0.00881174	0.00926684	0.00327848	0.00256857	0.00191766	0.00153535	0.00139086	0.00312889	0.0023023	0.00280863	0.00110724	0.00177246	0.00299046	0.00346671	0.00454028	0.0041651	0.00507949	0.00393031	0.00605274	0.000753915	0.000692699	0.00268352	0.00146587	0.00222473	0.00477305	0.00563685	0.00496607	0.0326002	0.0215768	0.0282834	0.00453475	0.00657829	0.00489705	0.0271877	0.0241066	0.0153585	0.00758751	0.00779743
Talofuranose (isomer 1)	Sugars	117.03	66	20.738	0.0585621	0.0655355	0.0843427	0.446229	0.348591	0.513647	0.108913	0.104008	0.096527	0.319193	0.369408	0.123422	0.083138	0.100067	0.262713	0.223087	0.207693	0.0957997	0.113176	0.16755	0.217742	0.219782	0.201794	0.0505746	0.0560734	0.0689701	0.446311	0.293402	0.0679062	0.0556738	0.0607416	0.306158	0.178864	0.196478	0.0139108	0.0137625	0.0159024	0.0572946	0.0650858	0.0643183	0.0567991	0.0275568	0.0124948	0.032085	0.0437107
Glucose-1	Sugars	23.57	71	21.174	0.0284728	0.0178262	0.0274132	0.0158499	0.0141278	0.0139111	0.0170094	0.0229751	0.0244875	0.0111713	0.00859036	0.00352823	0.00638406	0.0114574	0.0185855	0.016519	0.0180985	0.0173536	0.0213951	0.0217425	0.0132908	0.016705	0.0109893	0.0120443	0.0158958	0.0171837	0.0240006	0.0129249	0.0143798	0.0122622	0.0205244	0.0309599	0.0230521	0.0255405	0.0157167	0.0132174	0.0157061	0.028706	0.0341427	0.0315762	0.0344973	0.0312727	0.0207414	0.047607	0.045915
Glucose-2	Sugars	1518.42	72	21.276	2.20713	2.33115	2.73689	2.72504	2.29028	2.74063	2.4054	2.32662	2.40274	1.95415	1.92767	1.58448	2.31432	2.03852	1.84085	1.59963	1.88649	2.80785	3.07326	3.74777	1.77095	1.93662	1.59732	1.54261	1.8073	1.98459	2.57526	2.04949	1.52878	1.6017	1.6832	2.98272	2.59216	2.35695	0.188556	0.186416	0.214946	0.45102	0.547579	0.465722	0.172799	0.313839	0.185099	0.236419	0.240053
Glucopyranose-2	Sugars	136.71	73	21.393	0.428475	0.509009	0.579491	0.425886	0.417612	0.436798	0.530937	0.480279	0.496267	0.341789	0.357435	0.289564	0.34825	0.325937	0.59636	0.451154	0.579719	0.549821	0.47876	0.498972	0.396987	0.35095	0.345473	0.236096	0.289057	0.340813	0.968911	0.756953	0.297297	0.409404	0.340488	0.516605	0.426244	0.421222	0.0709245	0.076342	0.0798535	0.158123	0.138853	0.150372	0.0547738	0.0578743	0.0488954	0.0614347	0.0582627
Glucopyranose	Sugars	2341.16	79	22.175	3.25786	3.38612	3.74107	3.45155	3.06842	3.43045	3.49675	3.44817	3.3453	2.42702	2.44594	2.2205	3.38468	3.01915	2.37463	2.0539	2.46136	4.00485	4.37265	5.18425	2.36579	2.64885	2.06838	2.39101	2.65672	2.93828	3.091	2.53419	2.25889	2.30417	2.43486	3.85841	3.52093	3.26661	0.280221	0.258935	0.298377	0.596354	0.757025	0.623839	0.291324	0.467376	0.264028	0.325694	0.36736
Trehalose	Sugars	31.97	95	27.896	0.00417314	0.00699082	0.00928997	0.00537566	0.0051848	0.007842	0.0102838	0.00741087	0.0112446	0.003289	0.00209821	0.00530409	0.00814204	0.00855522	0.00547837	0.00496995	0.00673246	0.0110998	0.0111106	0.0116715	0.00639874	0.00735746	0.00599581	0.00716852	0.00741786	0.00771442	0.0102118	0.0112113	0.00663217	0.00688097	0.00610353	0.0076161	0.00722071	0.00657326	0.00726182	0.00330997	0.00610014	0.00626905	0.00570938	0.00692495	0.00372053	0.00418352	0.00354784	0.00413608	0.00355917
Cellobiose (isomer 1)	Sugars	84.55	98	28.465	0.027053	0.0498882	0.0461284	0.0427048	0.0292659	0.063897	0.0703367	0.0479604	0.0610754	0.0222678	0.017573	0.0231716	0.0602773	0.0863656	0.0210969	0.0168083	0.0235708	0.0857255	0.131356	0.121332	0.0422075	0.0427275	0.0400664	0.051036	0.046	0.052531	0.0549197	0.0527811	0.0388721	0.0341384	0.0271666	0.0401645	0.0641993	0.061151	0.0796578	0.0670293	0.0678807	0.014246	0.0231307	0.0222798	0.0790191	0.10076	0.0588719	0.0438237	0.0680208
Cellobiose (isomer 2)	Sugars	152.41	100	28.751	0.0384032	0.069977	0.0505793	0.0744497	0.0456445	0.108581	0.084704	0.0553308	0.0647913	0.0349049	0.027245	0.0255026	0.0881415	0.129761	0.0259584	0.0219931	0.0295823	0.134343	0.225748	0.205279	0.06872	0.0714352	0.0719759	0.0581702	0.0498633	0.0669924	0.0819024	0.0733015	0.0465825	0.0232643	0.0290975	0.0475729	0.078725	0.0800422	0.135302	0.117712	0.108327	0.0298201	0.0422048	0.041697	0.119961	0.166919	0.103697	0.0744561	0.113081
[truncated: 25 more columns]

## Sheet: Metabolite_wk4_to_wk0_ratios
## Week 4/Week 0 ratios for all identified metabolites, calculated from peak areas-under-the-curve normalized to the xylitol peak
					Untreated									Pom									BaP									PomBap
Metabolite Name	Class	S/N average	Peak number	Average Rt(min)	Wk04_C01_U_a	Wk04_C01_U_b	Wk04_C01_U_c	Wk04_C02_U_a	Wk04_C02_U_b	Wk04_C02_U_c	Wk04_C03_U_a	Wk04_C03_U_b	Wk04_C03_U_c	Wk04_C04_P_a	Wk04_C04_P_b	Wk04_C04_P_c	Wk04_C05_P_a	Wk04_C05_P_b	Wk04_C05_P_c	Wk04_C06_P_a	Wk04_C06_P_b	Wk04_C06_P_c	Wk04_C07_B_a	Wk04_C07_B_b	Wk04_C07_B_c	Wk04_C08_B_a	Wk04_C08_B_b	Wk04_C08_B_c	Wk04_C09_B_a	Wk04_C09_B_b	Wk04_C09_B_c	Wk04_C10_BP_a	Wk04_C10_BP_b	Wk04_C10_BP_c	Wk04_C11_BP_a	Wk04_C11_BP_b	Wk04_C11_BP_c	Wk04_C12_BP_a	Wk04_C12_BP_b	Wk04_C12_BP_c
Butyric acid	Acids	106.02	3	6.689	2.08007	1.86716	1.9392	0.0594016	0.055211	0.0415352	0.769519	1.93704	1.88348	0.109461	0.0472719	0.0248742	4.21752	3.91428	1.50938	0.11392	0.19805	0.019076	2.11287	2.20146	2.16736	0.0228764	0.089507	0.0303797	1.94818	2.51451	1.8429	0.219019	0.0684058	0.208823	1.44465	5.22126	1.78551	0.183909	0.173156	0.273887
Isovaleric acid	Acids	16.11	5	7.494	1.31312	1.08414	1.55003	1.14029	1.69532	1.50732	2.52651	2.42105	1.51935	2.68741	1.79311	2.66101	0.900282	0.822747	1.13607	1.69492	3.08275	2.88011	1.08318	0.700795	1.16991	1.30808	1.60298	1.10444	2.1337	2.19333	1.77192	2.18262	1.049	3.26539	2.85429	1.95456	1.99914	2.063	1.70619	3.50983
Propionic acid	Acids	360.63	7	7.938	185.728	0.299696	1.14459	3.11731	3.73103	3.02009	148.754	213.918	161.755	0.0404478	4.66423	0.120308	0.0497666	0.0517963	6.83627	0.167375	0.198208	0.0297472	0.0116404	0.00900489	0.00369836	0.0237329	0.0277873	1.16062	0.00354895	0.0137514	0.00255954	0.00828679	0.049645	0.0599627	2.46051	0.0253056	2.38106	1.27132	0.0532511	0.0573321
Valeric acid	Acids	27.51	8	8.301	1.95572	1.688	2.00302	1.11844	1.49975	1.36588	1.8611	3.04475	1.80065	1.51686	0.149233	1.09049	1.23942	1.1387	0.795177	1.27133	2.54324	1.48996	1.28327	0.914855	1.69996	1.59896	1.88193	1.5047	1.65929	1.56075	1.3286	1.89511	1.29303	2.40459	2.87536	2.74692	2.47862	3.08914	4.09208	7.7598
Lactic acid	Acids	15.95	12	9.837	0.694419	0.781637	0.858655	1.95184	1.75834	1.6431	0.445163	0.571783	0.744319	1.09872	0.54646	0.985785	0.774591	0.735642	0.336334	0.555717	0.529457	0.491185	0.392979	0.442306	0.429966	0.82844	0.742037	1.87657	2.8658	1.03752	2.52972	3.61094	1.77481	1.41643	0.436687	6.53861	4.0472	0.289793	5.88912	0.653654
Caproic acid	Acids	22.46	13	9.965	1.17473	1.22029	1.20953	0.58809	0.610263	0.742509	0.721903	0.715834	0.702764	0.413848	0.410251	0.63714	0.483025	0.451749	0.295269	0.609728	0.876292	0.533626	0.533465	0.710753	1.03408	1.16194	1.29474	1.69978	0.911349	0.842208	0.74834	1.74169	1.51832	1.35258	4.25384	3.22826	2.77195	2.27713	3.89395	6.84835
Glycolic acid	Acids	8.91	14	10.081	0.746819	0.791389	1.04024	1.52762	1.54942	1.94095	0.439	0.672582	0.851123	1.47455	0.682536	1.81225	0.553092	0.608292	0.318041	1.08745	1.63628	1.28571	0.485414	0.633178	0.825357	0.682513	0.588082	0.645702	0.880711	0.924309	0.729732	2.28013	1.40672	1.94353	0.510215	1.35914	0.814482	0.325625	1.30235	0.716831
alpha-Hydroxybutyric acid	Acids	6.74	17	10.959	0.689981	0.760488	0.789367	0.918872	0.941854	0.872626	0.487144	0.894773	1.55246	1.69284	0.501133	1.55461	0.785874	0.812577	0.403849	0.65623	0.658257	0.724379	0.84038	0.66149	1.0571	0.270332	0.234237	0.25028	0.689263	0.502664	0.88053	3.27926	1.25805	2.60727	0.142905	2.44187	0.834788	0.211811	1.97763	0.293174
beta-Lactic acid	Acids	33.64	18	11.189	0.344297	0.372555	0.481202	0.162625	0.166768	0.177208	0.401671	0.524976	0.350978	0.342662	0.20091	0.396082	0.42268	0.563636	0.411466	0.282834	0.372545	0.36104	0.239995	0.256652	0.314008	0.119107	0.127485	0.117169	0.398321	0.413352	0.474014	0.170413	0.115471	0.156891	0.254596	0.222054	0.158941	0.0882547	0.118044	0.0939877
2-Hydroxyvaleric acid	Acids	45.35	19	11.574	0.669828	0.667097	0.778212	0.46255	0.52352	0.493923	1.55153	3.23931	4.29217	1.604	0.62535	1.61502	1.78968	2.11709	1.00611	0.501616	0.69521	0.476826	1.99742	1.52615	2.58711	0.849114	0.655155	0.546051	1.02432	0.919832	1.08289	1.59986	1.06271	2.35978	0.196551	0.93851	0.385641	0.200762	0.997148	0.458943
2-Aminobutyric acid	Acids	39.98	20	11.69	0.106077	0.122318	0.161062	0.561405	0.569168	0.583545	0.0179724	0.242863	0.340126	0.963741	0.0559418	4.90226	0.079642	0.121149	0.0151482	0.10679	0.119657	0.300941	0.118251	0.176237	0.530373	0.10259	0.106085	0.0828242	0.0807052	0.0820798	0.0353171	3.79553	0.962539	3.20216	0.0129146	0.349852	0.0084751	0.0395926	0.660598	0.132863
gamma-Hydroxybutyric acid	Acids	65.39	22	12.658	1.86525	1.98715	2.13616	0.399339	0.462238	0.424371	1.56316	2.54014	1.60172	0.552028	0.311017	0.546991	2.77342	2.78161	2.21182	0.836539	1.08928	0.7104	1.90761	1.82065	1.96543	0.469662	0.475721	0.577824	1.25587	2.146	1.33768	1.0362	1.06628	1.24368	2.94036	4.01966	2.44938	0.781049	1.21857	0.776829
2-Hydroxyisocaproic acid	Acids	27.21	23	12.694	0.352232	0.332913	0.42387	0.364583	0.380642	0.334091	1.61799	1.65002	2.14969	1.57288	0.842251	2.22999	1.01939	1.22509	0.949176	0.256746	0.293839	0.431669	1.07626	0.80704	1.4177	0.447404	0.361391	0.353531	0.582577	0.596632	0.66246	1.83866	0.833182	2.23743	0.297309	1.58915	0.785233	0.16846	1.18826	0.322135
Succinic acid	Acids	27.77	28	13.836	0.252554	0.296869	0.270067	0.615964	0.58536	0.587759	0.148681	0.159766	0.153989	0.771427	0.305001	0.40695	0.534727	0.632334	0.438341	0.269908	0.876418	0.568829	0.608117	0.515091	1.40162	0.736953	0.630759	0.611507	1.07447	1.13382	0.54519	0.476973	0.248115	0.353048	0.042857	0.766494	0.472895	0.0234742	0.488871	0.0285276
4-Hydroxybutyric acid	Acids	9.25	32	14.862	0.549621	0.584087	0.477606	0.460454	0.5733	0.576469	1.6495	1.77551	2.24045	3.61546	2.08375	2.62462	2.5938	2.6071	2.89877	1.64033	2.44793	2.22166	2.9792	3.08398	2.54302	0.738482	0.51057	0.578733	0.857079	1.01146	1.00548	2.67718	2.12246	2.13936	0.210376	1.24027	1.55204	0.143421	1.65728	0.189412
Decanoic acid	Acids	42.89	35	15.267	0.394124	0.3371	0.197197	2.47197	2.12583	1.69816	0.5181	0.471938	1.81914	3.27802	0.707398	2.55074	1.42227	0.602042	1.57905	0.326185	0.60808	0.401654	0.939791	0.824773	1.61328	1.77755	1.10347	0.929743	0.840344	0.721201	0.5336	5.30851	5.01247	8.67963	0.188189	2.18871	1.02755	2.06541	2.46706	0.583732
Tartaric acid	Acids	52.28	42	17.36	0.170147	0.201425	0.158327	0.306498	0.283716	0.271472	0.149654	0.140444	0.261875	0.133285	0.0880201	0.379484	0.143774	0.177038	0.0653198	0.0892675	0.0838967	0.0664524	0.470454	0.167261	0.287492	0.16728	0.120297	0.257798	0.167655	0.166908	0.13189	1.06102	0.704851	0.436679	0.214186	0.665477	0.248592	0.163141	0.544085	0.216181
beta-Phenyllactic acid	Acids	32.24	43	17.594	0.2354	0.38685	0.353962	0.585558	0.628368	0.544374	1.36422	1.19117	1.57586	1.9292	0.969662	3.15984	0.789586	0.935414	0.780666	0.145792	0.151669	0.254467	0.667263	0.601426	0.922169	0.38874	0.387288	0.403616	1.07707	1.00319	0.965658	3.26147	1.82828	4.80238	0.0971902	1.13646	0.958314	0.0185272	0.942164	0.0739796
3-Hydroxyphenylacetic acid	Acids	60.52	45	17.846	3.12255	2.78705	2.95934	2.8209	3.42416	2.86694	3.57045	3.06848	2.57508	2.89465	1.79784	2.33865	1.62154	1.58351	1.49329	1.14646	1.62826	1.09622	2.01543	1.95346	2.50784	2.27319	2.25996	2.07159	2.25788	2.82901	1.9563	1.10227	1.08139	1.23087	2.31107	1.87584	1.7903	1.31643	1.69918	1.53592
p-Hydroxyphenylacetic acid	Acids	30.2	48	18.212	0.419557	0.534415	0.519889	0.684531	0.662847	0.600822	0.0263943	0.363708	0.324706	0.646434	0.421195	0.43764	0.306029	0.366652	0.0102593	0.253915	0.346276	0.366165	0.175509	0.18355	0.21422	0.27069	0.269454	0.28709	0.487607	0.439149	0.377144	0.529357	0.437468	0.519332	0.332761	0.774529	0.622519	0.246527	0.612209	0.338395
Ribofuranose (isomer 1)	Acids	63.82	49	18.314	0.166558	0.19189	0.229905	0.195904	0.240657	0.21714	0.481558	0.321856	0.187646	0.229733	0.218097	0.122875	0.25441	0.219766	0.367223	0.13001	0.18504	0.251184	0.179496	0.137888	0.174485	0.240187	0.300587	0.282323	0.314252	0.284527	0.312903	0.273308	0.25409	0.351275	0.563771	0.150457	0.327739	0.372349	0.159282	0.398705
3-Hydroxyphenylpropionic acid	Acids	643.6	55	19.256	1.99695	1.60483	2.07557	1.21449	1.28427	1.24284	3.41933	3.19805	3.13344	3.42414	2.53339	3.36204	5.21494	4.80971	3.95756	3.15489	5.39137	3.19337	3.76408	3.62187	5.46017	3.41608	2.93976	2.70573	5.8459	6.21137	3.96996	1.78156	1.80632	2.01385	0.740725	1.48658	1.57746	0.640587	1.78973	0.550905
Azelaic acid	Acids	11.95	59	19.973	0.670283	0.508964	0.465709	0.547641	0.597079	0.573335	0.298357	0.447936	0.350556	0.295884	0.308022	0.368285	0.33989	0.304876	0.232618	0.562094	0.520561	0.354314	0.295825	0.336347	0.415153	0.416351	0.429163	0.430779	0.401863	0.335001	0.382974	0.734253	0.521678	0.774222	0.746619	0.553929	0.688	0.754701	0.618429	1.01834
5-Hydroxyindoleacetic acid	Acids	595.03	84	24.122	0.396944	0.292128	0.153479	1.09134	1.75768	0.650401	1.90822	3.77118	4.63316	7.4697	4.88854	6.05634	4.73135	3.465	3.04804	3.48667	7.42533	4.3777	7.34186	5.8507	10.3009	3.64458	3.04727	1.54899	3.84475	3.77235	1.50712	1.59658	0.919294	3.41084	0.0912267	1.08946	1.0648	0.600792	1.01241	0.829992
Dehydroabietic acid	Acids	196.27	92	25.959	1.01739	0.949272	0.97122	0.5065	0.730522	0.665222	1.77318	2.11633	5.21631	0.343078	0.369113	0.626753	0.654812	0.501429	0.31837	0.706133	0.869746	0.524347	0.765881	0.754099	0.884575	0.411582	0.362933	0.366642	0.486676	0.42757	0.319784	0.794539	0.735939	1.03679	0.338315	0.547573	0.425417	0.256946	0.833445	0.411316
Ethylene glycol	Alcohol	31.49	9	8.452	0.0596544	0.042481	0.111094	0.0645766	0.0950586	0.0560864	0.00661696	0.115004	0.132988	7.15138	0.0466038	0.157577	0.265193	0.264304	0.0213024	0.1773	0.335773	7.41283	57.6813	2.02415	1.97814	0.875378	2.40795	1.25591	59.6087	75.6434	44.883	0.142044	0.126037	9.42668	0.0269977	5.4126	4.0353	4.34001	0.294817	0.255251
Propylene glycol	Alcohol	7.84	10	8.732	1.05367	0.799395	1.1271	1.50297	1.48186	1.74635	0.77174	1.29273	1.13722	2.11361	1.09908	1.39326	1.29096	1.04633	0.569722	1.21539	1.38527	1.03617	1.31742	1.16959	1.44054	2.35553	2.20406	1.53014	1.6179	1.51134	1.29421	1.62322	1.08254	1.86192	0.510848	2.11914	1.05405	1.00239	1.57656	1.4636
1,3 Propanediol	Alcohol	5.94	11	9.704	2.15918	1.67393	1.81727	0.824943	0.861362	0.791009	1.23852	1.91041	1.7559	0.779337	1.06176	0.745732	2.78557	2.28657	0.754163	0.821088	1.07186	1.26623	1.73075	1.79635	2.07769	0.606176	0.729497	0.711323	1.52485	1.68534	1.09566	0.988494	0.79601	0.857593	1.10744	3.7307	1.44896	0.521404	0.954424	0.854813
1,4-Butanediol	Alcohol	207.65	16	10.535	0.0603222	0.10763	0.142955	0.356828	0.315762	0.479995	0.0502333	0.182246	0.222135	0.184239	0.274224	0.898844	0.0430958	0.106299	0.0477391	0.0699113	0.0902069	0.087439	0.0191661	0.0539479	0.197023	0.156207	0.110858	0.123435	0.0801478	0.0534175	0.0419614	1.68498	0.688603	0.864373	0.0147693	0.185331	0.104714	0.0191658	0.293568	0.117312
1-Hexadecanol	Alcohol	493.83	76	21.688	1.00739	0.77945	0.972603	0.244726	4.15931	0.351881	0.635386	0.636578	0.419273	0.354827	0.808188	10.8331	0.374954	0.282231	0.229115	3.56228	2.31281	1.30875	0.574559	0.536209	0.743027	5.1826	0.880856	1.37203	0.573897	0.601144	0.447105	0.183283	0.216325	0.718739	0.201619	0.256767	0.253146	1.74214	1.49193	0.268246
Octadecan-1-ol	Alcohol	261.37	83	23.619	1.15211	0.848719	0.961427	0.341332	3.59568	0.429432	0.794503	0.778999	0.545673	0.356512	0.783816	8.35991	0.642872	0.51003	0.373586	3.15458	1.91433	1.12215	0.899838	0.804921	0.971458	4.31483	1.35071	1.63959	1.33763	1.2792	1.03354	0.236768	0.29643	0.791998	0.384434	0.434219	0.364222	1.6544	1.45247	0.41243
Nonane	Aliphatic hydrocarbon	72.57	4	6.751	1.61727	1.52999	1.53183	1.71513	1.78486	1.71902	0.0698333	1.27327	1.45313	1.38999	0.199533	0.980431	1.33541	1.28539	1.12226	1.05988	1.3294	1.07908	1.47617	1.58006	1.51096	1.07314	1.37719	1.27304	1.39592	1.55462	1.57652	1.69518	1.73945	1.45999	0.503511	1.79239	0.158716	1.607	1.29657	1.84968
l-Alanine	Amino acid	59.49	6	7.757	0.136145	0.0302077	0.211565	0.0496686	0.572731	0.0492148	0.0328359	0.465432	0.0285669	35.0194	0.532452	2.16304	1.20532	3.02878	1.02506	1.96622	3.38938	6.64126	1.23969	1.82708	5.4135	4.00733	3.77184	0.66773	5.22417	4.26936	1.94714	1.37801	0.571884	44.9143	0.426295	11.2724	1.7462	0.0475456	8.93725	2.23096
L-Valine	Amino acid	25.84	15	10.23	0.136344	0.172218	0.0939332	0.285912	0.326987	0.290234	1.17542	0.407235	0.224106	2.95286	3.50265	2.30217	0.0708855	0.123557	0.784114	0.0974875	0.161242	0.671124	0.0960441	0.108201	0.132937	0.0730796	0.0807859	0.0736395	0.178976	0.149559	0.420452	1.27998	0.266151	2.35853	0.488669	2.82657	4.95058	0.58867	0.905781	0.119981
Valine	Amino acid	800.19	21	12.387	0.0829282	0.0693528	0.105405	0.349057	0.384042	0.35988	0.0112403	0.250477	0.21147	0.368663	0.058922	1.63619	0.0447244	0.0606913	0.00508385	0.0502082	0.0677264	0.108864	0.0667626	0.0834666	0.172375	0.108506	0.115521	0.107915	0.116895	0.123083	0.0378502	1.51721	0.351017	1.39437	0.00353467	0.930894	0.0373208	0.0337997	0.670567	0.113303
l-Leucine	Amino acid	623.02	24	13.255	0.0555999	0.057923	0.0843575	0.271755	0.313547	0.310761	0.0120359	0.227931	0.165446	0.186254	0.0141034	0.438679	0.0366769	0.0457559	0.00328143	0.0461248	0.0620701	0.181653	0.0597858	0.0610191	0.14423	0.141782	0.129722	0.140548	0.0883149	0.101254	0.0207408	1.97633	0.460032	1.70697	0.00220036	1.12754	0.0220269	0.0314207	0.523203	0.168758
Leucine	Amino acid	134.16	26	13.535	0.679527	0.547405	0.619829	0.242067	0.425722	0.339192	0.555182	0.758533	0.49402	0.488021	0.261943	0.558224	0.543957	0.468194	0.493059	0.590317	0.968859	0.777763	0.445288	0.453637	0.737236	0.643503	0.671139	0.651295	0.717969	0.964887	0.500122	0.904854	0.567931	0.95378	1.08603	0.590427	0.501903	0.890463	0.422791	0.989891
Isoleucine	Amino acid	398.54	27	13.587	0.0467554	0.0517984	0.0675282	0.197501	0.227922	0.211132	0.00710001	0.121046	0.0979235	0.0925021	0.029628	1.33246	0.0304595	0.0305798	0.0038511	0.040842	0.0537813	0.0767978	0.0399892	0.0416528	0.0960655	0.131614	0.126981	0.133047	0.0613781	0.0828931	0.0211787	0.97626	0.21709	0.705736	0.00314858	0.574837	0.0247984	0.0291685	0.360421	0.135853
beta-Alanine	Amino acid	11.3	30	14.472	2.45074	2.41298	2.22028	1.08897	1.16681	1.22777	1.30976	1.57342	1.31925	1.03582	0.777559	1.22846	0.975322	0.951346	0.978972	1.39643	1.63818	1.23901	1.40391	1.43648	1.94068	1.40703	1.44654	1.68312	1.61415	1.99995	1.64338	1.44235	1.48043	1.43152	2.00473	2.62056	2.0857	1.67741	2.2961	1.67574
Serine	Amino acid	36.64	31	14.591	0.0650037	0.105501	0.116677	0.396472	0.417891	0.422867	0.0167336	0.140898	0.161737	0.139528	0.0254511	0.913902	0.0445254	0.0625206	0.00477844	0.191864	0.18741	0.223299	0.0414575	0.0776859	0.191582	0.350801	0.253632	0.502812	0.142288	0.148399	0.036059	0.949386	0.513172	0.615025	0.0175769	0.137981	0.0126562	0.0519741	0.302974	0.322663
L-Threonine	Amino acid	53.7	33	14.981	1.73118	1.56844	1.58333	0.610936	1.04864	1.12138	0.0552949	1.51258	2.54332	0.124577	0.16513	1.4008	2.50106	1.02075	0.0752644	1.63335	2.09209	0.642951	0.951389	1.45617	2.16366	1.01043	0.697555	1.19553	0.52633	0.315096	0.086665	1.7561	2.05594	1.29333	0.0700853	1.69999	0.114871	0.054597	1.73813	1.13568
Glycine	Amino acid	1035.08	34	15.063	1.17029	1.15534	1.15165	2.06694	2.12296	2.0214	0.413624	1.31592	1.12501	1.34869	0.750677	1.21848	0.816248	0.775462	0.382876	1.39962	1.72045	1.3791	1.01209	1.13439	1.25881	1.47416	1.4506	1.90424	0.938901	1.2566	0.627646	1.67889	1.77311	1.89784	0.146429	1.39056	0.413603	1.31342	1.9457	1.71005
Homoserine	Amino acid	15.86	36	16.118	0.0769665	0.0654925	0.0646136	0.241502	0.255561	0.215301	0.100011	0.129488	0.0938201	1.55706	0.363325	3.62963	0.0610769	0.0455822	0.0590861	0.0577325	0.127363	0.258972	0.06912	0.0757794	0.197662	0.208369	0.161889	0.144315	0.189442	0.172262	0.112889	4.06772	0.764272	3.89192	0.0507075	0.307574	0.376959	0.171374	0.413628	0.202911
Aspartate	Amino acid	120.05	37	16.158	0.222714	0.210918	0.228683	0.285747	0.358613	0.2721	0.659728	0.613095	0.443641	0.912012	0.837344	0.643404	0.237386	0.223205	0.410594	0.158962	0.27616	0.653023	0.218147	0.238414	0.402636	0.239919	0.277051	0.223758	0.541483	0.369632	0.44182	1.30488	0.669921	2.09329	0.229974	1.1518	1.13126	0.370244	0.619493	0.191022
DL-Phenylalanine	Amino acid	81.22	39	17.088	0.0728139	0.0674969	0.0874956	0.0834069	0.108306	0.0848611	0.12241	0.209633	0.118068	0.757587	0.266831	3.42913	0.051656	0.0603538	0.126884	0.0563274	0.0643011	0.598945	0.0689405	0.0718715	0.131981	0.0405702	0.0604823	0.0464262	0.141565	0.152734	0.0864167	0.634459	0.112783	1.00369	0.0396219	0.932223	0.361789	0.0881312	0.186059	0.0578251
2-Aminoadipic acid	Amino acid	23.52	58	19.871	0.048178	0.0269027	0.24053	0.17733	0.246114	0.177798	0.0149123	0.0338499	0.208001	1.50505	0.722789	2.21799	0.282511	0.796288	0.089754	0.119263	0.245915	0.165321	0.0485116	0.0439808	0.100204	0.128888	0.11979	0.0766201	0.0627617	0.0321463	0.0173448	1.63466	0.41269	1.74613	0.0197191	0.156497	0.114285	0.207529	0.280146	0.125972
Phenylalanine	Amino acids	66.52	47	18.118	0.0446495	0.041245	0.201288	0.212837	0.233229	0.237855	0.0151568	0.207727	0.0592152	0.162527	0.0584665	3.20715	0.108556	0.0362408	0.0383022	0.052796	0.0604562	0.19515	0.0453178	0.0732752	0.132162	0.146579	0.138085	0.155465	0.0919644	0.0921489	0.254417	1.17515	0.300342	0.948958	0.134333	0.487853	0.0999714	0.026452	0.286128	0.0432985
Tyrosine	Amino acids	151.88	75	21.649	0.0548447	0.049109	0.06183	0.0924664	0.167715	0.16095	0.0316619	0.0865693	0.0878687	0.288866	0.153782	3.71156	0.0330352	0.0318034	0.0214422	0.0915617	0.101295	0.353726	0.0800361	0.0735329	0.133589	0.170881	0.189568	0.156727	0.140974	0.147546	0.0504367	1.35414	0.335175	1.62677	0.0190835	0.719556	0.18672	0.072328	0.525525	0.172242
N-Acetyl-D-glucosamine (isomer 2)	Amino sugar	110.01	82	23.411	0.166086	0.147572	0.180218	0.295204	0.441401	0.374082	0.227642	0.320935	0.20071	0.224778	0.225169	0.35634	0.194702	0.180434	0.151676	0.130297	0.137479	0.154535	0.208557	0.28812	0.398721	0.258864	0.294034	0.255352	0.259707	0.233077	0.194175	0.288366	0.165002	0.261195	0.30837	0.187813	0.213578	0.227525	0.164876	0.336091
Ethylbenzene	Aromatic hydrocarbon	43.83	1	6.171	4.87922	4.47477	5.07308	2.24151	0.135287	2.32255	1.09741	5.00067	4.48874	0.0672536	0.181124	0.023338	0.103964	0.0885226	0.0121806	0.94115	0.0931392	0.0396798	0.0539413	2.04452	1.89977	0.701213	0.840716	0.842884	1.59587	1.86385	0.0170693	1.12945	1.09674	0.09459	0.231918	2.77111	0.244419	0.552691	0.0913938	0.133518
p-Xylene	Aromatic hydrocarbon	4440.95	2	6.362	0.524821	0.499681	0.466398	1.06874	0.612182	5.92125	0.501435	0.46655	0.490543	2.9661	3.6779	0.264782	0.0775144	0.00496169	0.207712	2.58115	3.175	2.54509	0.410445	0.475846	0.471979	0.720747	1.06985	4.71676	0.414982	0.443495	0.400215	4.16804	1.15826	1.0005	0.268535	0.357404	0.352647	2.09046	1.11214	4.5676
Tributyl acetylcitrate	Esters	791.46	90	24.645	0.0152061	0.01535	0.015462	0.0724765	10.1655	0.129909	0.0159811	0.0188057	0.0102304	0.0771818	1.12538	14.0627	0.00871193	0.00708869	0.00802678	4.5742	2.87822	1.4327	0.193732	0.202261	0.145275	47.4789	0.727534	12.6775	0.184105	0.198392	0.125572	0.0314566	0.0409199	0.816925	0.00561248	0.0163893	0.00503837	1.3027	2.4214	0.0250811
Myristic acid	Fatty acids/esters	143.17	64	20.522	3.26022	2.68758	3.25483	3.18223	3.70339	3.67131	2.4392	3.15562	2.96811	1.13258	1.04879	1.58752	1.1339	1.00134	0.848968	1.3331	1.45554	1.17474	1.24001	1.44614	1.54607	1.4701	1.57694	1.59835	1.23335	1.45357	1.01311	1.64343	1.6041	1.75303	1.27129	1.84286	1.08311	1.58474	1.80107	1.74617
Pentadecanoic acid ester	Fatty acids/esters	21.28	74	21.566	1.13538	0.859224	1.12902	0.612605	0.93664	0.73553	0.717297	0.939873	0.833076	0.519888	0.564301	1.28308	0.789696	0.674836	0.466472	0.824651	0.834645	0.596083	0.771516	0.908541	1.03782	0.948249	1.01146	1.24894	0.807269	0.828854	0.543396	0.603684	0.492519	0.547858	0.567465	0.812327	0.444013	0.608963	0.67496	0.821771
Palmitic acid	Fatty acids/esters	253.75	80	22.564	1.11327	0.83513	1.02504	0.870427	1.12728	0.973209	0.692214	0.885687	0.840679	0.648421	0.68351	1.25201	0.898194	0.852514	0.613866	1.09286	1.01414	0.780955	0.961561	1.1396	1.09597	1.03002	1.01835	1.15881	0.912567	0.968884	0.717632	0.689846	0.711647	0.663489	0.462672	0.875763	0.46059	0.467391	0.740612	0.573599
Linoleic acid	Fatty acids/esters	341.73	85	24.183	1.19636	0.949842	0.881578	0.512711	0.6075	0.549572	0.821542	0.906388	0.756045	0.495106	0.441699	0.799221	1.08673	0.968651	0.587745	0.851518	1.21467	0.620997	1.06852	1.00993	1.26094	1.13884	0.986441	1.00083	0.929233	0.785034	0.629862	0.569861	0.616699	0.53935	0.251724	0.615496	0.445253	0.190614	0.540188	0.325136
9-Octadecenoic acid ester	Fatty acids/esters	1210.24	86	24.217	1.34572	1.0241	0.95746	0.609477	0.716718	0.593626	0.822308	0.978497	0.803006	0.492463	0.497001	1.02753	1.24208	1.14711	0.654085	1.11316	1.23564	0.75073	1.05101	1.03107	1.21672	1.08368	0.970188	0.987086	0.849105	0.809727	0.641228	0.495312	0.555515	0.438329	0.30485	0.653895	0.391174	0.211339	0.502402	0.320707
trans-13-Octadecenoic acid	Fatty acids/esters	36.58	87	24.284	1.47993	1.13681	1.2185	0.851552	1.00267	0.852295	0.687007	0.970054	0.766203	0.530742	0.524592	0.736787	1.01317	0.898499	0.497269	1.12375	1.03804	0.716498	1.09056	1.21138	1.33196	1.05713	1.20146	1.25618	0.956718	0.854373	0.709945	0.531643	0.505803	0.454464	0.54538	1.05465	0.596502	0.425732	0.719207	0.710894
Oleic acid	Fatty acids/esters	137.6	88	24.339	0.438241	0.227787	0.114568	0.623742	1.31384	0.337234	7.23507	4.37985	4.89279	14.5301	10.6173	2.78495	6.16653	3.04844	6.63317	1.05375	2.75341	2.48654	10.2773	4.99687	10.6684	1.65673	2.2385	0.82319	4.80779	4.13801	2.92048	0.386155	0.23934	1.49195	0.272863	0.84884	1.81135	0.365733	0.305096	0.318992
Stearic acid	Fatty acids/esters	87.27	89	24.434	1.17949	0.909875	1.1612	1.08284	1.53895	1.18726	0.752783	1.08672	0.957709	0.716811	0.729078	1.38485	0.89203	0.807496	0.615627	1.22479	1.10743	0.900171	1.06598	1.29182	1.22929	1.12266	1.20199	1.27775	0.964232	1.08522	0.830783	0.704536	0.702106	0.685456	0.464706	0.952776	0.441691	0.525229	0.767603	0.615892
Arachidonic acid	Fatty acids/esters	16.01	91	25.615	0.699924	0.43313	0.456733	0.490051	0.565551	0.344105	0.474672	0.833294	0.434157	0.402364	0.409787	1.59658	0.405894	0.325064	0.332055	0.526779	0.764985	0.734386	0.514712	0.464633	0.779497	0.446272	0.35634	0.474655	0.46023	0.474735	0.305724	0.708518	0.440313	0.70384	0.430528	0.547778	0.342	0.43872	0.353132	0.417445
Eicosanoic acid	Fatty acids/esters	50.35	93	26.157	1.23636	0.839826	1.00939	0.848987	0.884251	0.990028	0.648067	0.869108	0.970314	0.587941	0.681929	1.03053	0.843151	0.795519	0.569341	1.03259	0.873288	0.54557	0.844909	0.924782	0.856907	0.518144	0.589253	0.836741	0.665932	0.662469	0.519719	0.417389	0.354505	0.36689	0.326313	0.541683	0.260783	0.192199	0.307734	0.252962
1-Monopalmitin	Fatty acids/esters	1972.91	94	27.414	2.58727	2.30813	2.66062	1.96853	2.74659	2.32569	2.30712	2.77966	2.22834	1.48828	1.83368	1.99845	1.36878	1.3287	0.923284	1.82772	2.32366	1.76234	1.88518	1.71842	1.94592	2.02524	1.65181	1.72636	1.7847	1.96455	1.81664	1.17553	1.31958	1.7606	1.65242	1.66231	1.35431	1.62787	1.61994	1.47131
9-Octadecenoic acid, -2-propyl ester	Fatty acids/esters	46.89	97	28.452	8.31207	5.977	5.98338	1.88883	2.15115	1.95129	12.4731	7.52703	4.42073	6.31223	9.99973	3.62438	9.30513	9.44079	12.6648	5.73247	11.1619	6.7615	11.6685	5.63862	7.59637	5.01468	4.66977	3.88745	6.67536	6.65148	9.06258	1.70524	1.69366	2.25531	3.29308	2.19163	5.25145	2.50421	1.88471	1.94252
1-Monooleoylglycerol	Fatty acids/esters	144.36	99	28.722	11.492	9.14306	8.14488	3.68408	4.03203	3.6772	9.85388	9.52781	7.41297	5.90602	6.10127	6.05729	11.1872	10.5335	7.55902	9.99129	19.365	8.7117	12.5827	10.9528	13.9012	12.5249	10.649	10.2999	10.7436	8.58397	8.55983	3.63668	3.56003	3.52137	2.52249	4.15954	3.92017	1.79058	3.73704	2.91662
Stearic acid, 2,3-propyl ester	Fatty acids/esters	1471.38	101	28.882	1.60378	1.64257	1.84939	1.43756	3.36032	1.72873	1.39844	2.04869	1.59261	1.04161	1.56714	3.23314	1.01162	1.02141	0.700538	2.53116	2.30889	1.59014	1.76283	1.52478	1.62482	2.24662	1.18126	1.48904	1.28171	1.57251	1.6344	0.726079	0.917184	1.43826	1.64355	1.06905	0.832694	1.82715	1.75759	0.908944
Uracil	Nitogenous	687.57	29	14.254	0.00189207	0.00170326	0.00205141	0.0556725	0.0937274	0.0790549	0.114249	0.194819	0.00153108	0.106815	0.0535555	0.305738	0.0021544	0.0954427	0.00212707	0.0732952	0.107793	0.145654	0.00207913	0.115285	0.193774	0.157206	0.157967	0.185872	0.0015988	0.138481	0.0721422	0.193936	0.137951	0.166126	0.158136	0.14711	0.102424	0.225581	0.0759272	0.178544
Adenosine	Nitogenous	64.53	96	27.976	2.56297	2.27209	2.61034	2.06929	3.18297	3.10576	5.56877	5.64976	4.11474	13.0164	13.7803	14.0396	10.8094	9.19959	8.22994	5.99403	11.5923	7.57514	2.85863	3.10557	5.28768	1.9629	1.84131	1.63495	5.05415	5.07305	3.86185	3.63268	1.78427	3.84385	4.06259	4.15568	4.56825	2.57121	3.09451	3.0526
m-Hydroxybenzoic acid	Phenolic acid	42.77	41	17.283	0.935233	2.12814	3.86217	0.149714	0.152658	0.13892	3.16891	4.63531	0.639183	0.162614	0.105324	0.186661	1.0761	3.75677	2.52115	0.135436	0.143472	0.164298	1.87462	2.09232	0.96095	0.131274	0.151285	0.16395	0.950802	3.67389	2.20091	0.940746	0.5151	0.961224	30.3713	4.4121	5.88378	1.32084	0.996531	0.534283
protocatechuic acid	Phenolic acid	364.14	50	18.384	0.0277209	0.0209436	0.0354966	0.205261	6.39908	0.303829	0.062764	0.50111	0.0283565	0.244333	0.417121	10.1195	0.0213103	0.0320372	0.714306	4.56084	2.08116	1.42482	0.302765	0.392129	0.244806	18.4473	0.930931	3.31441	0.174288	0.159014	0.161065	0.111271	0.0888709	0.761342	0.174288	0.660802	0.164529	2.19178	1.94957	0.0790466
4-Hydroxyhydrocinnamic acid	Phenolic acid	111.28	56	19.639	2.21402	2.06449	2.22207	1.26468	1.25891	1.25474	3.01995	2.81538	3.48014	6.5194	4.16067	5.45687	7.38239	8.18327	8.33248	4.52915	6.73738	4.85361	3.66164	3.14935	6.02186	2.2135	1.86239	1.60114	9.14106	8.67509	5.94859	3.85155	3.07754	5.62524	0.816955	1.82173	1.63294	1.08293	1.98593	0.504239
Benzenepropanoic acid, 4-hydroxy-3-methoxy	Phenolic acid	65.51	70	21.142	0.324357	0.429348	0.281396	0.558617	0.606309	0.371961	0.476572	0.0382223	0.511505	2.87333	1.56733	1.87944	3.03344	3.30785	2.33452	1.89022	2.46778	1.69694	0.318437	0.300833	0.0521358	0.625138	0.388551	0.542959	0.5453	0.433268	0.637327	5.04443	2.64628	6.64619	0.0929006	2.3392	1.02748	0.0848047	1.3723	0.14229
Hydrocaffeic acid	Phenolic acid	140.91	77	21.901	0.183405	0.17414	0.100632	0.325874	0.368478	0.136663	2.27041	2.10878	1.29695	3.87463	2.77905	1.30794	5.47048	5.01698	5.79285	1.00895	2.41267	1.55511	4.1767	2.76899	4.53277	2.18152	1.911	1.07404	4.30998	4.75987	3.4983	0.7001	0.582199	1.69489	0.140829	0.558022	0.924204	0.12133	0.592142	0.0863052
Coprostanol	Sterol	1133.02	103	31.14	2.87857	2.14207	2.4693	0.45243	1.0185	0.768597	1.52967	1.6557	1.19157	0.556915	1.00069	0.648806	1.78593	1.27854	0.913404	1.96823	1.59613	1.09205	1.41005	1.31477	1.30172	0.894991	1.14354	1.16355	1.10477	1.01913	0.908964	0.546124	0.781226	0.684619	1.59035	1.27549	1.28437	1.22788	0.977158	1.76561
L-Threonic acid	Sugar acid	36.03	40	17.148	0.0727361	0.108013	0.0998015	0.129227	0.121417	0.131823	0.0883143	0.0839154	0.173095	0.0499303	0.0420696	0.316761	0.0653783	0.0789568	0.0383132	0.0554812	0.0586404	0.0483926	0.0416161	0.0747829	0.137785	0.108857	0.0681401	0.135719	0.0777714	0.0843847	0.0580967	0.879284	0.502404	0.201142	0.159469	0.271023	0.137241	0.0668484	0.226742	0.10529
Ribonic acid	Sugar acid	51.65	60	20.05	0.574438	0.551457	0.576896	0.973152	0.886058	1.16106	0.541488	0.690832	0.839232	0.453637	0.416122	1.14463	0.412738	0.500974	0.369886	0.847892	0.853888	0.806028	0.411063	0.569364	0.901113	0.598748	0.403446	0.642679	0.683162	0.589917	0.530145	3.36803	2.25989	1.89745	1.32413	1.99414	1.24262	0.388197	2.21599	0.509694
L-Threitol	Sugar alcohol	7.42	38	16.674	0.201317	0.202351	0.236268	2.10382	1.68634	1.52644	0.419084	0.326161	0.427712	2.91267	1.63641	2.27785	0.843279	1.16411	2.29688	0.185794	0.337967	0.320471	0.386669	0.38934	0.325421	0.230625	0.18223	0.191813	0.393414	0.373202	0.445807	2.62409	1.73788	2.23379	0.427564	2.6605	2.25461	0.324606	2.18473	0.363364
Pinitol	Sugar alcohol	87.67	65	20.643	0.0770577	0.0644938	0.0780057	2.12126	1.80928	1.50785	0.0813591	0.0592394	0.0439062	0.194464	0.10007	0.30502	0.0887035	0.102219	0.763589	3.46294	2.7871	3.22723	0.0730126	0.0762727	0.0948703	0.0654001	0.0813694	0.0857377	0.0844007	0.0834743	0.0852808	53.4783	21.4747	36.991	1.2893	63.1013	43.9241	0.232359	47.9972	1.02895
1,5-Anhydro-D-sorbitol	Sugar alcohol	38.47	67	20.8	0.153758	0.127364	0.13974	0.11715	0.243885	0.159325	0.0705321	0.195196	0.184734	0.236352	0.0725168	4.28382	0.0972676	0.103214	0.0337137	0.136204	0.16304	0.309447	0.097944	0.151994	0.171993	0.237423	0.248911	0.218733	0.15493	0.152604	0.0596542	0.896255	0.354451	0.660089	0.0483604	0.672608	0.143309	0.13551	0.314536	0.37608
Ribitol	Sugar alcohol	138.27	68	20.915	0.132079	0.164449	0.17096	0.355454	0.302742	0.327687	0.065827	0.116593	0.102066	0.166678	0.121679	0.183357	0.14833	0.176479	0.116623	0.0779358	0.0940686	0.107059	0.0806732	0.0914396	0.121769	0.169893	0.143064	0.160634	0.227673	0.158084	0.145989	0.255924	0.168614	0.262906	0.0743754	0.157209	0.117353	0.0659845	0.1713	0.121202
Myoinositol-1	Sugar alcohol	217.81	69	20.951	0.350761	0.377883	0.294966	0.728105	0.603412	0.589519	0.443767	0.438436	0.512537	0.527764	0.530074	0.67908	0.41778	0.415778	0.4737	0.514065	0.601435	0.530879	0.423346	0.41254	0.641684	0.355048	0.241695	6.50804	0.464372	0.447563	0.391239	1.2495	0.694604	1.41408	0.186387	1.16283	0.927813	0.163113	1.19131	0.391695
Myoinositol-2	Sugar alcohol	133.2	78	21.962	0.0825176	0.0819242	0.0826451	0.863531	0.747116	0.665441	0.496355	0.627526	0.0654177	0.219935	0.137571	0.308182	1.01695	1.02246	1.06484	1.12759	0.977856	1.25008	1.51558	1.60705	2.08032	0.0787857	0.0843055	0.0739116	1.45939	1.86429	1.01469	25.5583	11.8265	21.0862	0.831071	32.369	23.4145	1.48697	23.8816	0.720848
Myoinositol-3	Sugar alcohol	228.82	81	23.315	0.0551504	0.033171	0.0678075	0.244397	6.60185	0.346361	0.0990328	0.928359	0.0506168	0.258563	0.560331	10.6099	0.0548931	0.0520559	1.15697	5.24804	2.08777	1.27328	0.374336	0.649354	0.344553	17.7833	0.931802	2.64348	0.325334	0.233187	0.216358	0.142132	0.101072	0.86364	0.339689	1.29134	0.263411	2.033	1.97388	0.0813569
Maltitol	Sugar alcohol	1588.88	102	28.979	6.69579	5.12225	4.99859	3.385	3.12997	3.01814	4.41403	5.99587	4.94852	28.9988	35.3756	29.0115	17.3633	21.6397	22.7227	14.3775	19.1025	20.6068	11.0328	11.3454	15.2666	6.80769	6.36952	5.78548	29.2559	17.8443	16.2017	54.6216	28.121	63.5112	5.0632	11.1329	19.853	3.82089	16.762	4.66139
Glycerol	Sugars	63.4	25	13.326	0.576556	0.420151	0.544176	0.406574	0.384131	0.576087	0.391078	0.55088	0.602592	0.366137	0.256758	0.688518	0.389454	0.263355	0.305054	0.628048	0.563933	0.429399	0.378875	0.261732	0.487032	0.348108	0.327362	0.48413	0.316234	0.447633	0.306186	0.279515	0.226395	0.802516	0.273767	0.300854	0.338138	0.434343	0.228646	0.341677
Xylulose	Sugars	16.68	44	17.663	0.813151	0.971087	0.892166	1.01934	1.26855	1.10332	3.7095	3.02477	3.3245	6.44903	5.1338	3.66915	1.4439	1.8013	2.60371	2.78593	4.07963	4.20841	3.53631	3.70154	4.16705	4.89035	3.59212	3.30617	1.1065	1.29764	1.11663	2.25146	2.03401	3.09547	0.0786911	1.8991	1.46921	0.0428118	1.56651	0.109087
Arabinose-1	Sugars	167.28	46	18.041	0.258537	0.291381	0.588432	0.208198	0.213916	0.443968	0.16248	0.499707	0.304691	0.109979	0.108872	0.183244	0.455313	1.2303	0.0911084	0.142057	0.218717	0.17238	0.345387	0.421205	0.424904	0.148062	0.144512	0.20794	0.282262	0.292048	0.175411	0.695004	0.235747	0.296582	0.110864	0.409842	0.220437	0.0718775	0.471397	0.226569
Arabinose-2	Sugars	75.35	51	18.454	0.167504	0.193632	0.205252	0.359469	0.302101	0.33319	0.2083	0.222045	0.213015	0.196541	0.150903	0.210402	0.225071	0.244985	0.195858	0.0946345	0.135457	0.149985	0.121146	0.122497	0.174303	0.216011	0.214327	0.195732	0.319845	0.270298	0.274949	0.282596	0.24915	0.34521	0.173655	0.27044	0.282049	0.151715	0.248534	0.231246
Ribose	Sugars	48.83	52	18.681	0.126519	0.148531	0.187338	0.119579	0.184594	0.149112	0.258487	0.264383	0.154703	0.19436	0.164421	0.124412	0.174989	0.155047	0.231424	0.125276	0.178063	0.223011	0.111551	0.107471	0.124695	0.190478	0.218863	0.189808	0.194269	0.202184	0.146054	0.241324	0.244161	0.335558	0.416578	0.0884585	0.15725	0.317079	0.0988185	0.352399
Ribofuranose (isomer 2)	Sugars	54.37	53	18.774	0.257353	0.305608	0.312056	0.611034	0.559662	0.534118	0.582618	0.376136	0.295565	0.415005	0.38774	0.295015	0.336387	0.33444	0.452447	0.146707	0.249247	0.267338	0.223261	0.16023	0.207498	0.253898	0.294435	0.285899	0.543677	0.540939	0.671499	0.423099	0.348648	0.584545	0.422102	0.441357	0.823006	0.251008	0.512264	0.31163
Arabinose-3	Sugars	64.35	57	19.809	0.132982	0.135024	0.150333	0.181566	0.203937	0.199226	0.174822	0.182963	0.163964	0.0751219	0.0788683	0.0843549	0.267084	0.267651	0.169374	0.0588693	0.0672931	0.0733612	0.163745	0.167857	0.243272	0.309901	0.322926	0.310602	0.272203	0.22805	0.214438	0.127043	0.135786	0.118735	0.13282	0.177856	0.160122	0.107697	0.155388	0.17718
Fructofuranose (isomer 1)	Sugars	35.97	61	20.31	0.00521494	0.0831798	0.0829084	0.396113	0.170241	0.292096	0.167032	0.14001	0.103395	0.190786	0.203272	0.165249	0.138001	0.14062	0.146378	0.179987	0.166574	0.16841	0.111482	0.104669	0.1427	0.171189	0.157274	0.280404	0.202835	0.182298	0.204608	0.490615	0.309088	0.663608	0.773741	0.265782	0.505314	0.477453	0.420132	0.595414
Glucopyranose-1	Sugars	37.74	62	20.338	0.116114	0.117727	0.138615	0.173302	0.178761	0.175322	0.088652	0.146349	0.115943	0.155535	0.12371	0.203705	0.219327	0.218399	0.152379	0.10243	0.177715	0.194224	0.169965	0.169816	0.242414	0.204571	0.20409	0.184282	0.222649	0.194868	0.145484	0.373618	0.304861	0.358982	0.322547	0.135004	0.132237	0.287333	0.162141	0.37501
Glucose	Sugars	105.05	63	20.385	7.35263	4.86641	6.37901	1.02276	1.48366	1.10448	6.13191	5.43698	3.46395	3.20643	3.29514	2.66249	15.4231	11.1158	9.70037	11.6592	10.9628	9.32649	2.55971	2.08376	3.15669	2.89856	3.80539	3.32916	4.50424	3.96264	3.32033	2.00642	1.66082	2.61716	11.5362	6.17272	7.1312	7.09749	5.24064	13.865
Talofuranose (isomer 1)	Sugars	117.03	66	20.738	0.0685504	0.0678197	0.0783646	0.282339	0.320733	0.316951	0.279897	0.135796	0.0615727	0.151997	0.207071	0.210205	0.0927362	0.0807439	0.168816	0.080213	0.119	0.137653	0.176903	0.096119	0.134938	0.389836	0.325031	0.429993	0.354178	0.236303	0.410172	0.570897	0.304226	0.524976	0.673106	0.113836	0.550742	0.330591	0.37802	0.735379
Glucose-1	Sugars	23.57	71	21.174	0.77689	0.653344	0.776366	1.41896	1.6877	1.56084	1.70522	1.54583	1.02526	4.03731	3.89382	3.45364	2.1576	2.11962	2.34732	0.978623	2.60962	1.5128	1.13444	0.979793	1.98731	1.31123	1.38977	1.18621	3.83932	3.4504	2.74782	3.79324	1.33259	4.58374	3.83585	2.07258	3.19143	2.74822	3.00336	2.68034
Glucose-2	Sugars	1518.42	72	21.276	0.0765594	0.0756903	0.0872744	0.183127	0.222333	0.189097	0.0701615	0.127428	0.0751555	0.124874	0.126793	0.167837	0.145627	0.150331	0.112542	0.0648876	0.0953722	0.122429	0.100747	0.0967899	0.14517	0.17265	0.179052	0.217331	0.195186	0.127227	0.122479	0.353273	0.20556	0.382721	0.364305	0.145157	0.225919	0.319279	0.255843	0.545352
Glucopyranose-2	Sugars	136.71	73	21.393	0.148283	0.159609	0.166951	0.330589	0.290302	0.314385	0.114516	0.120998	0.102226	0.149376	0.141663	0.167644	0.146853	0.16293	0.143404	0.0699706	0.0857306	0.102641	0.084833	0.0929577	0.125772	0.178907	0.151222	0.171959	0.243161	0.157468	0.193404	0.234186	0.157364	0.230004	0.0889746	0.153647	0.149024	0.0731808	0.159473	0.147039
Glucopyranose	Sugars	2341.16	79	22.175	0.0823489	0.0760933	0.0876843	0.175251	0.222468	0.183328	0.0856116	0.137348	0.0775901	0.127803	0.144153	0.162041	0.160848	0.160924	0.133646	0.0683982	0.0995468	0.133441	0.110563	0.0995825	0.156854	0.173595	0.179885	0.202836	0.199046	0.126095	0.129475	0.363806	0.199102	0.382068	0.419493	0.164897	0.271951	0.354345	0.256362	0.54502
Trehalose	Sugars	31.97	95	27.896	0.96402	0.439404	0.809805	0.832227	0.757931	0.9193	0.493907	0.555369	0.470982	0.742408	0.638854	1.36035	0.532177	0.694155	0.433411	0.988724	1.28739	1.10624	0.361298	0.410653	1.14981	1.30261	0.984163	1.14449	0.595704	0.413703	0.575305	1.25594	0.901609	0.995346	0.653113	0.769041	0.616695	0.437443	0.867557	0.686408
Cellobiose (isomer 1)	Sugars	84.55	98	28.465	1.63565	1.37634	1.39382	0.292518	0.474952	0.457481	1.62253	2.06894	1.20884	1.29306	2.00702	1.07172	1.75038	1.73224	1.36652	1.43629	1.41512	1.94769	1.57006	1.42787	1.83784	1.28677	1.61058	1.44466	1.01745	0.569969	0.782771	0.881568	0.873485	0.684143	1.98979	0.923636	0.918691	2.59424	0.952909	1.96817
Cellobiose (isomer 2)	Sugars	152.41	100	28.751	2.05536	1.78815	1.64558	0.452994	0.641129	0.633415	1.82231	2.53565	1.57525	1.55486	2.36146	1.58019	1.80531	1.81389	1.24128	1.84774	1.9761	2.36599	1.43745	1.36152	1.89438	1.67687	1.92327	1.76409	1.07075	0.449595	0.654206	1.27903	1.14683	0.874993	2.18238	1.15116	1.1485	3.28041	1.3444	2.81688

## Sheet: Averaged_normalized_levels
## Levels of all identified metabolites, calculated from peak areas-under-the-curve normalized to the xylitol peak, and averaged to each cage (n = 3)
	## Metabolite levels, normalized to xylitol																										## Metabolite week 4/week 0 ratios
	Control group												Untreated			Pom			BaP			PomBap					Untreated			Pom			BaP			PomBap
Metabolite Name	Wk0_C01_U	Wk0_C02_U	Wk0_C03_U	Wk0_C04_P	Wk0_C05_P	Wk0_C06_P	Wk0_C07_B	Wk0_C08_B	Wk0_C09_B	Wk0_C10_PB	Wk0_C11_PB	Wk0_C12_PB	Wk04_C01_U	Wk04_C02_U	Wk04_C03_U	Wk04_C04_P	Wk04_C05_P	Wk04_C06_P	Wk04_C07_B	Wk04_C08_B	Wk04_C09_B	Wk04_C10_PB	Wk04_C11_PB	Wk04_C12_PB			Wk04_C01_U	Wk04_C02_U	Wk04_C03_U	Wk04_C04_P	Wk04_C05_P	Wk04_C06_P	Wk04_C07_B	Wk04_C08_B	Wk04_C09_B	Wk04_C10_PB	Wk04_C11_PB	Wk04_C12_PB
Butyric acid	0.0409124	0.000740921	0.0579684	0.00183396	0.0609629	0.00257781	0.0551487	0.00126022	0.0427764	0.0013966	0.0379303	0.00116741	0.0651574	0.00172841	0.0508076	0.00102276	0.0542964	0.00186436	0.0714321	0.00157333	0.0694914	0.00248302	0.0422875	0.00315704		Butyric acid	1.59261	2.33279	0.87647	0.55768	0.890645	0.723233	1.29526	1.24846	1.62453	1.77791	1.11487	2.70431
Isovaleric acid	0.00805358	0.0249843	0.0185204	0.0201191	0.0283503	0.0174477	0.0419878	0.0156826	0.0110943	0.0283087	0.0143783	0.00603489	0.0226128	0.0248793	0.037047	0.0504076	0.0201806	0.0540515	0.0225692	0.0306805	0.0465991	0.0319049	0.033432	0.0357451		Isovaleric acid	2.80779	0.995796	2.00034	2.50546	0.71183	3.09791	0.537518	1.95634	4.20029	1.12703	2.32518	5.92307
Propionic acid	0.000473579	0.000959483	0.000682938	0.0367474	0.000463933	0.00154361	0.112708	0.00142421	0.108517	0.00160174	0.0803368	0.0275439	0.0440063	0.00232018	0.123299	0.0232808	0.0334753	0.00190749	0.000602233	0.0299869	0.00049131	0.00160555	0.0662798	0.0188195		Propionic acid	92.9228	2.41816	180.542	0.633535	72.1555	1.23573	0.0053433	21.0551	0.0045275	1.00238	0.825025	0.683254
Valeric acid	0.0138441	0.0642252	0.0317124	0.0361275	0.0630274	0.0404778	0.0948409	0.0276335	0.0173784	0.0320076	0.0212875	0.0105351	0.0688788	0.0485976	0.0818057	0.0408746	0.0470535	0.0786554	0.0605731	0.0774721	0.0706822	0.0371645	0.0538316	0.099285		Valeric acid	4.97533	0.756674	2.57961	1.1314	0.746555	1.94317	0.638681	2.80356	4.06725	1.16111	2.52878	9.42419
Lactic acid	0.364656	0.151371	0.606392	0.101994	0.0749831	0.768253	0.0940926	0.126301	0.434749	0.101754	0.161152	0.143662	0.291169	0.667625	0.219653	0.302638	0.212409	0.181328	0.0921023	0.250924	0.468285	0.316854	0.513442	0.31827		Lactic acid	0.798477	4.4105	0.36223	2.96722	2.83277	0.236026	0.978848	1.9867	1.07714	3.11392	3.18608	2.2154
Caproic acid	0.0102093	0.0539026	0.0212726	0.0136626	0.042453	0.030828	0.0346239	0.0143481	0.00902716	0.0108394	0.0100392	0.00535834	0.0341969	0.0184133	0.0203073	0.0132959	0.0111922	0.0183769	0.0146821	0.0267857	0.0161231	0.0130443	0.0289982	0.0368187		Caproic acid	3.34958	0.341603	0.954623	0.973164	0.263639	0.596111	0.424047	1.86685	1.78606	1.20341	2.8885	6.87128
Glycolic acid	0.0188839	0.0322966	0.0243599	0.0336096	0.0244618	0.0291685	0.0317107	0.0219233	0.0264874	0.040941	0.0169045	0.0151109	0.0216419	0.0421178	0.0164737	0.0392398	0.0146252	0.0396363	0.0173057	0.0170596	0.0225653	0.0417418	0.0198971	0.0173836		Glycolic acid	1.14605	1.30409	0.676264	1.16752	0.59788	1.35887	0.545739	0.778149	0.851927	1.01956	1.17703	1.1504
alpha-Hydroxybutyric acid	0.00943658	0.00793494	0.013628	0.0109998	0.00772119	0.0123254	0.0103871	0.0101169	0.00783894	0.0148961	0.00578636	0.00683953	0.00771486	0.00941472	0.0101071	0.0133415	0.00712636	0.0072565	0.00805876	0.00237718	0.00652662	0.0201447	0.00964172	0.00699991		alpha-Hydroxybutyric acid	0.817548	1.18649	0.741645	1.21289	0.922961	0.588742	0.775844	0.234971	0.832589	1.35235	1.66628	1.02345
beta-Lactic acid	0.013646	0.00531274	0.0377067	0.0193031	0.0100383	0.0074256	0.0318896	0.0135433	0.0250351	0.00584006	0.0679076	0.00584351	0.00754314	0.00318964	0.00804414	0.00392551	0.00583939	0.0042462	0.00634725	0.00284817	0.0100667	0.00429738	0.00616877	0.00291445		beta-Lactic acid	0.552771	0.600376	0.213334	0.203362	0.581709	0.571833	0.199038	0.2103	0.402101	0.735845	0.0908407	0.498749
2-Hydroxyvaleric acid	0.0176381	0.0195756	0.0392749	0.0193011	0.0199179	0.0261613	0.0223812	0.0410958	0.0224453	0.0484373	0.0302571	0.0426415	0.017976	0.0125781	0.0771942	0.0282278	0.0360735	0.012289	0.058338	0.0195742	0.028899	0.0660378	0.0199954	0.0217856		2-Hydroxyvaleric acid	1.01916	0.642537	1.96548	1.4625	1.81111	0.469739	2.60657	0.476307	1.28753	1.36337	0.660849	0.510901
2-Aminobutyric acid	0.0286066	0.0514035	0.0489743	0.0690883	0.0258496	0.057419	0.041535	0.0675026	0.0310682	0.0326732	0.0522103	0.0558937	0.00558154	0.024566	0.00861273	0.106403	0.00387989	0.00947586	0.0128408	0.00453786	0.00308392	0.12924	0.00602739	0.0135253		2-Aminobutyric acid	0.195114	0.477906	0.175862	1.5401	0.150095	0.16503	0.309157	0.0672249	0.0992629	3.95555	0.115444	0.241982
gamma-Hydroxybutyric acid	0.33209	0.0893865	0.53868	0.126784	0.699431	0.0866719	0.634769	0.103043	0.445604	0.110742	0.355802	0.111658	0.638884	0.13719	0.608636	0.119808	0.659933	0.223994	0.748668	0.200288	0.623206	0.226404	0.636649	0.187857		gamma-Hydroxybutyric acid	1.92383	1.5348	1.12986	0.944978	0.943528	2.58439	1.17943	1.94372	1.39856	2.04442	1.78934	1.68243
2-Hydroxyisocaproic acid	0.0122933	0.0121927	0.0240404	0.0123073	0.0119949	0.0195898	0.0124376	0.0184034	0.0128029	0.02519	0.0154209	0.0182389	0.00597961	0.00581948	0.0292112	0.0231639	0.0159259	0.00489822	0.0160076	0.0056365	0.00893085	0.030961	0.0168494	0.0105879		2-Hydroxyisocaproic acid	0.486412	0.477293	1.21509	1.88213	1.32772	0.250039	1.28703	0.306274	0.697567	1.2291	1.09263	0.580515
Succinic acid	0.289549	0.203528	0.276625	0.109365	0.130513	0.182357	0.154979	0.210733	0.221738	0.110643	0.24778	0.540167	0.0700847	0.153007	0.0395486	0.070225	0.0760018	0.0811977	0.164801	0.129188	0.179725	0.11613	0.138115	0.0582594		Succinic acid	0.242048	0.751772	0.142969	0.642117	0.582331	0.445268	1.06338	0.61304	0.810532	1.04959	0.557411	0.107854
4-Hydroxybutyric acid	0.00156762	0.00203337	0.00821638	0.00168616	0.00191016	0.0023128	0.00906756	0.0017629	0.00429184	0.0034727	0.00137329	0.0112312	0.00211572	0.00211429	0.00743898	0.00548582	0.00533809	0.00415855	0.0144606	0.00307115	0.00482908	0.0129409	0.00559987	0.00371146		4-Hydroxybutyric acid	1.34964	1.0398	0.905384	3.25345	2.79457	1.79806	1.59476	1.7421	1.12518	3.72647	4.07771	0.33046
Decanoic acid	0.0136588	0.0105726	0.0153291	0.0185562	0.00199172	0.00670834	0.00307835	0.0139865	0.0127317	0.00318592	0.00761049	0.00831246	0.00408098	0.0276746	0.0123481	0.0217264	0.0119777	0.00444065	0.0111831	0.0126164	0.00693645	0.0428628	0.00767997	0.0115414		Decanoic acid	0.29878	2.61757	0.805533	1.17085	6.01376	0.661959	3.63283	0.902041	0.544818	13.4538	1.00913	1.38845
Tartaric acid	0.00971004	0.0219859	0.0216416	0.0244329	0.0205283	0.0304555	0.0221539	0.0184806	0.0208281	0.0206056	0.00593839	0.00426336	0.00314039	0.00510669	0.00327121	0.0051498	0.00330981	0.00205393	0.0063184	0.00372446	0.00318548	0.00659081	0.00337614	0.00276316		Tartaric acid	0.323416	0.232272	0.151153	0.210774	0.161232	0.0674404	0.285205	0.201533	0.152942	0.319856	0.568527	0.648117
beta-Phenyllactic acid	0.00563995	0.00406609	0.0107528	0.00448776	0.0041222	0.00661396	0.00596164	0.00652991	0.00704301	0.00344314	0.0089054	0.00709149	0.00221913	0.00399697	0.00939116	0.010489	0.00433789	0.000955515	0.00475527	0.00256042	0.00661118	0.0226188	0.00501201	0.00236582		beta-Phenyllactic acid	0.393466	0.983	0.873371	2.33725	1.05232	0.14447	0.797646	0.392107	0.938687	6.56923	0.562806	0.333613
3-Hydroxyphenylacetic acid	0.00603147	0.00842497	0.00650391	0.00603419	0.0128171	0.00609186	0.0101337	0.00891904	0.00568406	0.00580238	0.0093779	0.00789348	0.0206552	0.0212212	0.0214588	0.0181674	0.0121398	0.0100019	0.0178015	0.0181534	0.0193584	0.00902272	0.0157945	0.0120272		3-Hydroxyphenylacetic acid	3.42456	2.51885	3.29936	3.01075	0.947154	1.64185	1.75666	2.03535	3.40574	1.55501	1.68423	1.52369
p-Hydroxyphenylacetic acid	0.0344145	0.0373914	0.0314205	0.0284791	0.0273977	0.0324753	0.0340401	0.0408648	0.027913	0.03828	0.0319421	0.0271947	0.0169046	0.0223451	0.00819856	0.0149058	0.00676277	0.00956927	0.00654926	0.00945049	0.014896	0.0157267	0.018305	0.0126682		p-Hydroxyphenylacetic acid	0.491206	0.5976	0.26093	0.523396	0.246837	0.294663	0.192398	0.231262	0.53366	0.410832	0.573069	0.465832
Ribofuranose (isomer 1)	0.120873	0.186667	0.164131	0.099311	0.144834	0.137983	0.193643	0.120494	0.117526	0.178363	0.143038	0.135109	0.0308344	0.0342591	0.0519394	0.0238162	0.0351127	0.0236297	0.0235913	0.0394778	0.0437266	0.0436103	0.0517149	0.0461745		Ribofuranose (isomer 1)	0.255097	0.18353	0.316452	0.239815	0.242434	0.17125	0.121829	0.327634	0.37206	0.244503	0.361547	0.341756
3-Hydroxyphenylpropionic acid	0.0666809	0.0763598	0.0588759	0.0662754	0.0354376	0.0503776	0.0538503	0.0962204	0.0637475	0.0682231	0.0847796	0.0843575	0.127373	0.0839432	0.218761	0.163417	0.245175	0.205852	0.305193	0.215281	0.380768	0.15028	0.102072	0.0799783		3-Hydroxyphenylpropionic acid	1.91018	1.09931	3.71564	2.46572	6.91849	4.08618	5.66743	2.23737	5.97307	2.20277	1.20397	0.948088
Azelaic acid	0.00671297	0.0158333	0.0101286	0.0107496	0.0105793	0.0106257	0.017795	0.0093318	0.00651312	0.011112	0.00656101	0.00925751	0.00597208	0.00623747	0.00398216	0.00345471	0.00311781	0.00510631	0.00391466	0.00477049	0.0041857	0.00589418	0.00577339	0.00694319		Azelaic acid	0.889633	0.393946	0.393159	0.321379	0.294709	0.480562	0.219986	0.511208	0.642656	0.530431	0.879955	0.750006
5-Hydroxyindoleacetic acid	0.0289461	0.022035	0.0223712	0.00896843	0.0100219	0.0159003	0.0217074	0.0254089	0.0133539	0.0141755	0.018657	0.0759547	0.00686701	0.0285212	0.0840501	0.0726225	0.0443451	0.0602988	0.157851	0.0553695	0.0613049	0.0770933	0.0292088	0.0317805		5-Hydroxyindoleacetic acid	0.237234	1.29436	3.75707	8.09757	4.4248	3.79231	7.27174	2.17914	4.59079	5.43847	1.56557	0.418413
Dehydroabietic acid	0.010982	0.0249227	0.010552	0.0164563	0.0272205	0.0160273	0.0296459	0.0242305	0.0232049	0.00426478	0.0466355	0.0304137	0.0151649	0.0098191	0.0470029	0.00847393	0.00933255	0.013292	0.020594	0.00977354	0.010569	0.0256381	0.0130954	0.0149969		Dehydroabietic acid	1.38089	0.393983	4.45442	0.514936	0.34285	0.829331	0.694667	0.403356	0.455463	6.01159	0.280803	0.493096
Ethylene glycol	0.000880296	0.0260852	0.0452804	0.0318665	0.000857535	0.00126831	0.000631308	0.00127556	0.00157758	0.0497246	0.00042535	0.00131505	0.00171166	0.00173167	0.00204383	0.0309913	0.00232069	0.0333943	0.0238815	0.00175741	0.0697412	0.0422814	0.0413225	0.0213269		Ethylene glycol	1.94441	0.066385	0.0451372	0.972535	2.70623	26.3297	37.8285	1.37776	44.2077	0.850312	97.1495	16.2176
Propylene glycol	0.0108658	0.0148225	0.0183136	0.0132383	0.0105595	0.0201821	0.0118159	0.0111187	0.0113269	0.0145777	0.0119902	0.0171262	0.0145703	0.0231312	0.0156534	0.0232946	0.0147022	0.0183933	0.0149515	0.0231826	0.0168393	0.0221731	0.0178836	0.019624		Propylene glycol	1.34093	1.56055	0.85474	1.75964	1.39232	0.911368	1.26537	2.08501	1.48666	1.52103	1.49153	1.14585
1,3 Propanediol	0.0269153	0.00916912	0.0342791	0.0106344	0.0384524	0.0105375	0.0389667	0.00861529	0.0296241	0.0109179	0.0280512	0.0102596	0.0441756	0.019368	0.0383468	0.0151352	0.0340889	0.0184839	0.0480804	0.0175601	0.0369375	0.0150564	0.0358281	0.0132816		1,3 Propanediol	1.64128	2.11231	1.11866	1.42322	0.886521	1.75411	1.23389	2.03824	1.24687	1.37906	1.27724	1.29455
1,4-Butanediol	0.171851	0.426021	0.154416	0.355709	0.208953	0.450771	0.323321	0.444194	0.173325	0.229649	0.186781	0.39591	0.025988	0.096342	0.0380001	0.160465	0.0233058	0.0292669	0.0282395	0.040822	0.0183492	0.297807	0.0280349	0.039553		1,4-Butanediol	0.151224	0.226143	0.246089	0.451112	0.111536	0.0649264	0.0873419	0.0919014	0.105865	1.2968	0.150095	0.0999039
1-Hexadecanol	0.0151313	0.0963657	0.00843073	0.0750488	0.0113306	0.0123528	0.0116458	0.0433552	0.0177118	0.123811	0.0135646	0.0371026	0.0367704	0.063374	0.0225362	0.142387	0.0105199	0.085268	0.0149772	0.0600728	0.0131056	0.0186216	0.0118477	0.058317		1-Hexadecanol	2.43009	0.65764	2.67311	1.89726	0.92845	6.90271	1.28605	1.3856	0.739939	0.150403	0.873426	1.57178
Octadecan-1-ol	0.0121748	0.0585725	0.00759959	0.0488385	0.0134502	0.0100775	0.0122309	0.0250193	0.0136467	0.0698609	0.0110065	0.0242281	0.0257871	0.0380108	0.0184479	0.0806129	0.0129528	0.0525333	0.0151345	0.041312	0.0206436	0.0135515	0.0120962	0.0359886		Octadecan-1-ol	2.11808	0.648953	2.42748	1.6506	0.963018	5.21292	1.2374	1.6512	1.51272	0.193979	1.099	1.48541
Nonane	0.0693102	0.0671749	0.101948	0.0953489	0.107973	0.0796226	0.105866	0.0718571	0.079992	0.0671446	0.0695141	0.0682186	0.123961	0.138265	0.0740796	0.0793324	0.115545	0.107065	0.130781	0.106619	0.129633	0.111656	0.0559947	0.108431		Nonane	1.7885	2.05828	0.726639	0.832022	1.07013	1.34466	1.23534	1.48376	1.62057	1.66292	0.805517	1.58946
l-Alanine	0.00380519	0.00550411	0.169497	0.00510752	0.0033885	0.00489324	0.00385954	0.0036824	0.00273312	0.00787286	0.00317714	0.00436412	0.00750823	0.0133432	0.0104668	0.057797	0.00805949	0.0183848	0.0096817	0.0096436	0.0130615	0.0749231	0.0214948	0.017931		l-Alanine	1.97315	2.42423	0.0617522	11.3161	2.37849	3.75719	2.50851	2.61883	4.77897	9.51663	6.76547	4.10872
L-Valine	0.00407967	0.00828608	0.0196335	0.0144646	0.012712	0.0106529	0.0273975	0.00777704	0.00779426	0.0102479	0.0155342	0.0109652	0.00143106	0.00321107	0.00642389	0.0367737	0.00410898	0.00390448	0.00160981	0.00108618	0.00357589	0.0162685	0.0344389	0.00672641		L-Valine	0.350779	0.387525	0.327191	2.54232	0.323236	0.366517	0.0587577	0.139665	0.458785	1.58749	2.21697	0.613431
Valine	0.198231	0.331434	0.292624	0.535587	0.334374	0.443276	0.348224	0.376173	0.221836	0.271948	0.260046	0.488821	0.0235435	0.0998604	0.0432329	0.310026	0.0165995	0.0340703	0.0339176	0.0348994	0.02921	0.379344	0.112986	0.0950711		Valine	0.118768	0.301298	0.147742	0.578853	0.0496435	0.0768601	0.0974017	0.0927747	0.131674	1.39491	0.434485	0.19449
l-Leucine	0.0650999	0.177647	0.132018	0.373712	0.113295	0.227009	0.188737	0.197812	0.0859379	0.18272	0.0537515	0.220388	0.00823984	0.0373125	0.0168816	0.0540187	0.00724554	0.0245013	0.0139139	0.0216321	0.0110409	0.20507	0.0570057	0.0358032		l-Leucine	0.126572	0.210037	0.127874	0.144546	0.063953	0.107931	0.0737215	0.109357	0.128476	1.12232	1.06054	0.162455
Leucine	0.0135258	0.0258187	0.0223566	0.0121124	0.0240474	0.0121151	0.0282085	0.0114313	0.0145515	0.0136575	0.015342	0.0225762	0.0126608	0.00690355	0.0123933	0.00658332	0.00757481	0.0117604	0.00985174	0.0118374	0.0131443	0.0142631	0.0128042	0.0135376		Leucine	0.936048	0.267386	0.554344	0.543518	0.314994	0.970722	0.349248	1.03552	0.903294	1.04435	0.834584	0.599642
Isoleucine	0.0407457	0.140448	0.0933387	0.218355	0.0879527	0.164159	0.140963	0.132121	0.0547839	0.125575	0.0368026	0.17939	0.0050661	0.0194172	0.00689595	0.0802117	0.0035783	0.0094528	0.00647384	0.0142675	0.0060273	0.071194	0.0225975	0.0196981		Isoleucine	0.124335	0.138252	0.073881	0.367345	0.0406844	0.0575831	0.0459257	0.107988	0.11002	0.566947	0.614019	0.109806
beta-Alanine	0.00300589	0.00804955	0.0046449	0.00462114	0.00609124	0.00542955	0.005195	0.00544346	0.00332016	0.00369559	0.00415067	0.00269806	0.0123579	0.006077	0.00733107	0.00536563	0.00512537	0.00753839	0.00741525	0.00703622	0.00815414	0.00506865	0.00781197	0.00657604		beta-Alanine	4.11124	0.754948	1.57831	1.16111	0.841434	1.3884	1.42738	1.2926	2.45595	1.37154	1.8821	2.43732
Serine	0.00577846	0.0338121	0.0166672	0.0292303	0.01039	0.0333647	0.0204805	0.0199811	0.00772577	0.028146	0.00548846	0.017819	0.00179513	0.00773376	0.00199633	0.0093757	0.000971778	0.00523649	0.00166367	0.00592836	0.00174945	0.0109259	0.000884629	0.00356351		Serine	0.31066	0.228728	0.119776	0.320753	0.0935302	0.156947	0.0812317	0.296698	0.226443	0.388186	0.16118	0.199984
L-Threonine	0.00912658	0.00762122	0.00809922	0.00970366	0.0067296	0.00654725	0.0196215	0.00698497	0.0171558	0.00854366	0.0113239	0.00604354	0.0134807	0.00767761	0.0113501	0.00438208	0.00932421	0.0113236	0.0222274	0.0141182	0.00451281	0.0147183	0.00543414	0.00844232		L-Threonine	1.47709	1.0074	1.40138	0.45159	1.38555	1.72952	1.13281	2.02123	0.263049	1.72272	0.47988	1.39692
Glycine	0.185113	0.357301	0.310774	0.530019	0.352592	0.366729	0.355854	0.37919	0.231426	0.412043	0.21187	0.36473	0.329642	0.588823	0.270607	0.469397	0.279357	0.636525	0.365679	0.518565	0.303166	0.569286	0.207566	0.528779		Glycine	1.78076	1.64798	0.870753	0.885622	0.792296	1.73568	1.02761	1.36756	1.30999	1.38162	0.979685	1.44978
Homoserine	0.00481451	0.0119914	0.0098015	0.0187781	0.00355873	0.0158142	0.00903826	0.00806035	0.00445553	0.00943119	0.00427889	0.00830584	0.000612184	0.00210602	0.000955853	0.0256444	0.000765842	0.00205186	0.000820401	0.00123235	0.00113661	0.0205799	0.00173445	0.0018587		Homoserine	0.127154	0.175628	0.0975211	1.36565	0.215201	0.129748	0.0907698	0.152891	0.2551	2.18211	0.40535	0.223783
Aspartate	0.00806801	0.0168656	0.017324	0.0201802	0.0102845	0.0192161	0.0177172	0.0202534	0.011093	0.0232184	0.0138776	0.0197364	0.00310976	0.00430304	0.0080593	0.0138339	0.00503682	0.00629119	0.00468392	0.00403809	0.00737554	0.0249643	0.0154215	0.00724586		Aspartate	0.385443	0.255137	0.46521	0.685521	0.48975	0.327391	0.264372	0.199378	0.664883	1.0752	1.11126	0.367131
DL-Phenylalanine	0.00901556	0.00944697	0.0269132	0.0147669	0.0207823	0.00874938	0.0261231	0.00610297	0.0190194	0.00953451	0.0195705	0.015601	0.00114854	0.00139441	0.00226935	0.0208043	0.00111597	0.00336141	0.00155327	0.000839736	0.00216777	0.00908908	0.00692287	0.00172349		DL-Phenylalanine	0.127396	0.147604	0.084321	1.40884	0.053698	0.384189	0.0594595	0.137595	0.113977	0.953282	0.353739	0.110473
2-Aminoadipic acid	0.095775	0.007858	0.022243	0.0113389	0.0524401	0.0058437	0.0577132	0.00464419	0.0699731	0.00266693	0.0475098	0.00485785	0.0044142	0.0084091	0.00359114	0.0289772	0.00761643	0.00345771	0.00283329	0.00478299	0.0016505	0.025675	0.00196617	0.00415328		2-Aminoadipic acid	0.0460892	1.07013	0.161451	2.55556	0.145241	0.591698	0.0490926	1.02989	0.0235876	9.62719	0.0413846	0.854963
Phenylalanine	0.0198659	0.06219	0.0391924	0.0768563	0.0375933	0.0663427	0.0422127	0.043157	0.0183082	0.0354321	0.0123401	0.0655767	0.00386893	0.00921381	0.00380044	0.0721029	0.00385105	0.0064865	0.00288864	0.00507017	0.00505176	0.0307718	0.00916582	0.0045169		Phenylalanine	0.194752	0.148156	0.0969688	0.938151	0.10244	0.0977727	0.0684307	0.117482	0.275929	0.868472	0.742766	0.0688797
Tyrosine	0.0645627	0.183711	0.109493	0.15695	0.11236	0.179458	0.115237	0.103051	0.0418725	0.10674	0.00878486	0.199747	0.00659021	0.0167408	0.00819286	0.213585	0.00443606	0.0281021	0.00830079	0.0149499	0.00979815	0.115936	0.032352	0.0269237		Tyrosine	0.102075	0.0911255	0.0748254	1.36085	0.0394809	0.156595	0.0720321	0.145073	0.234	1.08615	3.6827	0.134789
N-Acetyl-D-glucosamine (isomer 2)	0.0292043	0.0524024	0.0366456	0.0397433	0.035979	0.0557666	0.0478466	0.053189	0.0416605	0.0242106	0.0434754	0.0749519	0.0064891	0.0145935	0.00984498	0.0120435	0.00786899	0.00630807	0.0141966	0.0128149	0.0108918	0.0120196	0.0119389	0.0122539		N-Acetyl-D-glucosamine (isomer 2)	0.222197	0.278489	0.268654	0.303032	0.218711	0.113116	0.296712	0.240931	0.261442	0.496461	0.274612	0.163491
Ethylbenzene	0.014819	0.00957329	0.00121834	0.0179218	0.0371687	0.0147406	0.0323596	0.0141344	0.0251651	0.0161971	0.0219622	0.0141205	0.0410541	0.0133726	0.0301261	0.00195097	0.00146955	0.00771131	0.0318344	0.0189882	0.0276826	0.0136	0.0190303	0.00455682		Ethylbenzene	2.77037	1.39686	24.7271	0.10886	0.0395374	0.523134	0.983772	1.3434	1.10004	0.839657	0.866504	0.32271
p-Xylene	0.192093	1.95001	0.0468517	2.20291	0.307151	1.0967	0.310457	2.02821	0.229537	1.71161	0.213409	1.25258	0.362613	1.84898	0.354739	3.02637	0.127116	3.63633	0.38759	1.85691	0.359175	2.06179	0.318904	2.53218		p-Xylene	1.88769	0.94819	7.57154	1.3738	0.413855	3.31571	1.24845	0.915544	1.56478	1.2046	1.49434	2.02156
Tributyl acetylcitrate	0.000337903	0.0982754	0.000385437	0.137116	0.000506277	0.0017382	0.00048508	0.00776776	0.000340318	0.237988	0.00079894	0.0373167	0.000506192	0.114045	0.000495183	0.265599	0.000414571	0.154592	0.000516801	0.0581317	0.000485102	0.021874	0.0006651	0.0922177		Tributyl acetylcitrate	1.49804	1.16047	1.28473	1.93704	0.818862	88.938	1.06539	7.48371	1.42544	0.0919121	0.832479	2.47122
Myristic acid	0.0148933	0.138934	0.198124	0.382348	0.249713	0.278747	0.233512	0.278246	0.231254	0.286768	0.192195	0.274113	0.359876	0.412836	0.334859	0.389877	0.308705	0.409998	0.349399	0.383509	0.305463	0.410975	0.344955	0.421776		Myristic acid	24.1636	2.97146	1.69015	1.01969	1.23624	1.47086	1.49628	1.37831	1.3209	1.43313	1.79481	1.53869
Pentadecanoic acid ester	0.0209863	0.0432521	0.0232045	0.0343878	0.0352366	0.0210234	0.0335133	0.0301247	0.0305837	0.0358733	0.0241033	0.0496103	0.0303487	0.0221986	0.0241949	0.0233478	0.0190451	0.0222443	0.0284537	0.0335915	0.0228176	0.0200635	0.0222571	0.0256971		Pentadecanoic acid ester	1.44612	0.513237	1.04268	0.678958	0.540491	1.05807	0.849029	1.11508	0.74607	0.559288	0.923405	0.51798
Palmitic acid	0.537111	0.650885	0.53625	0.633449	0.571917	0.436336	0.494888	0.454925	0.498947	0.471222	0.863665	0.725674	0.569662	0.569178	0.463359	0.468683	0.428893	0.523824	0.514653	0.516271	0.418383	0.491333	0.428053	0.423907		Palmitic acid	1.0606	0.874467	0.864072	0.73989	0.749922	1.20051	1.03994	1.13485	0.838533	1.04268	0.495623	0.584156
Linoleic acid	0.449038	0.341406	0.390507	0.264609	0.415983	0.311969	0.404902	0.302693	0.267226	0.327423	0.50998	0.590766	0.397296	0.219104	0.325939	0.185299	0.28212	0.286823	0.3617	0.338599	0.253901	0.284566	0.216399	0.174101		Linoleic acid	0.884771	0.641768	0.834656	0.700276	0.6782	0.919397	0.893304	1.11862	0.950135	0.869106	0.424327	0.294705
9-Octadecenoic acid ester	0.352303	0.209828	0.297839	0.196808	0.363066	0.174209	0.317943	0.1734	0.231353	0.168865	0.594102	0.328795	0.317929	0.183443	0.2488	0.154568	0.233214	0.237525	0.264893	0.244187	0.184694	0.192748	0.174726	0.133893		9-Octadecenoic acid ester	0.90243	0.874254	0.835351	0.785371	0.642347	1.36345	0.833147	1.40823	0.79832	1.14143	0.294101	0.407223
trans-13-Octadecenoic acid	0.0815725	0.0804711	0.0558217	0.0721243	0.0788087	0.0522052	0.0764661	0.0459652	0.0571697	0.0287366	0.127811	0.0887195	0.0928407	0.0655173	0.0586606	0.0396213	0.0532583	0.0636349	0.0725169	0.0701396	0.050309	0.0439532	0.0647121	0.0546748		trans-13-Octadecenoic acid	1.13814	0.814172	1.05086	0.549347	0.675792	1.21894	0.948354	1.52593	0.879994	1.52952	0.506311	0.616266
Oleic acid	0.0146927	0.00400967	0.00578248	0.00260892	0.00227838	0.0048025	0.00549099	0.00914664	0.00442654	0.00250673	0.00985273	0.0310333	0.00212365	0.00618875	0.04491	0.0311807	0.0176912	0.00702561	0.0549527	0.00999474	0.0251356	0.0112641	0.0156028	0.0052655		Oleic acid	0.144537	1.54345	7.76656	11.9516	7.7648	1.46291	10.0078	1.09272	5.67839	4.49354	1.5836	0.169672
Stearic acid	0.164131	0.203034	0.159306	0.269545	0.192624	0.123745	0.167411	0.134143	0.169772	0.159902	0.384797	0.227052	0.190148	0.222817	0.163628	0.184602	0.150979	0.210795	0.187855	0.188656	0.150837	0.187884	0.166966	0.171416		Stearic acid	1.15851	1.09744	1.02713	0.684865	0.783801	1.70346	1.12211	1.40639	0.888464	1.17499	0.433905	0.754961
Arachidonic acid	0.0090979	0.0129318	0.00965044	0.0104976	0.020423	0.0109924	0.0152166	0.00910685	0.00614105	0.00898984	0.0175116	0.01484	0.00559607	0.00492699	0.00613229	0.0105699	0.00466468	0.00889108	0.00595358	0.00432348	0.00419966	0.00888004	0.00632836	0.00579628		Arachidonic acid	0.615095	0.380998	0.635442	1.00689	0.228403	0.808837	0.391255	0.474751	0.683867	0.987786	0.361382	0.390584
Eicosanoic acid	0.0103155	0.00552297	0.00935881	0.00844718	0.0113499	0.00342466	0.00942954	0.0039367	0.00879933	0.00319212	0.0281967	0.0065986	0.00863868	0.00762432	0.00696422	0.00558951	0.00536503	0.00595652	0.00646889	0.0047881	0.00455163	0.00525596	0.00520979	0.00347493		Eicosanoic acid	0.837446	1.38047	0.744135	0.661702	0.472696	1.7393	0.686024	1.21627	0.51727	1.64654	0.184766	0.526616
1-Monopalmitin	0.0487903	0.103663	0.0889617	0.141294	0.131571	0.10435	0.101228	0.10408	0.0930213	0.141523	0.119749	0.106825	0.202682	0.188862	0.19622	0.2217	0.150876	0.246423	0.183954	0.17911	0.184496	0.170719	0.1873	0.189308		1-Monopalmitin	4.15415	1.82188	2.20567	1.56906	1.14673	2.36151	1.81723	1.72089	1.98337	1.2063	1.5641	1.77214
9-Octadecenoic acid, -2-propyl ester	0.0180373	0.00788686	0.0159316	0.00474896	0.0132653	0.0073767	0.0185306	0.00792528	0.0112092	0.0102099	0.0297473	0.018113	0.09428	0.0278633	0.113573	0.0522562	0.0823322	0.0620056	0.104221	0.0567987	0.0937001	0.0386372	0.073364	0.043265		9-Octadecenoic acid, -2-propyl ester	5.22693	3.53288	7.12878	11.0037	6.20657	8.4056	5.62428	7.16677	8.35918	3.7843	2.46624	2.38862
1-Monooleoylglycerol	0.0615147	0.0314535	0.0793327	0.0223862	0.047015	0.0507822	0.0596349	0.0325584	0.0389158	0.061907	0.119625	0.0796541	0.550978	0.21812	0.512972	0.235995	0.382508	0.497319	0.545367	0.487636	0.406254	0.32228	0.318796	0.253909		1-Monooleoylglycerol	8.95686	6.93467	6.46608	10.542	8.13586	9.79317	9.1451	14.9772	10.4393	5.20588	2.66495	3.18764
Stearic acid, 2,3-propyl ester	0.024451	0.0938862	0.0434689	0.118538	0.0699765	0.0534066	0.0531366	0.061284	0.0486813	0.168082	0.0581462	0.0612474	0.0916135	0.117338	0.0906068	0.159626	0.0746932	0.175701	0.0890254	0.0891066	0.0813448	0.0891517	0.102569	0.130007		Stearic acid, 2,3-propyl ester	3.74681	1.24979	2.08441	1.34663	1.0674	3.28988	1.67541	1.45399	1.67097	0.530406	1.76398	2.12265
Uracil	0.0634697	0.178978	0.106907	0.0779122	0.152468	0.077317	0.194542	0.0829411	0.07474	0.128667	0.0809214	0.149524	0.00021919	0.00886796	0.0120565	0.0149664	0.00320207	0.0104915	0.0121766	0.0196088	0.0083055	0.0196855	0.0161143	0.0189755		Uracil	0.00345346	0.0495479	0.112776	0.192093	0.0210016	0.135694	0.0625915	0.236419	0.111125	0.152996	0.199136	0.126906
Adenosine	0.0020964	0.00383996	0.0023684	0.00117602	0.000692082	0.00182871	0.00423062	0.00198623	0.00327807	0.00327121	0.0029585	0.00469216	0.00687025	0.00771239	0.0141488	0.0176929	0.0122349	0.0109016	0.0118706	0.00573827	0.0147583	0.0113809	0.0157138	0.0107142		Adenosine	3.27716	2.00845	5.97399	15.0448	17.6784	5.96134	2.80588	2.88902	4.50214	3.47911	5.3114	2.28343
m-Hydroxybenzoic acid	0.0521006	0.00461747	0.182115	0.00346973	0.384572	0.00440779	0.199471	0.00464303	0.069369	0.00700148	0.0374286	0.00334195	0.183783	0.0117106	0.224062	0.0150165	0.242921	0.0146402	0.149744	0.0135681	0.207409	0.0137284	0.230981	0.0161967		m-Hydroxybenzoic acid	3.52747	2.53614	1.23034	4.32785	0.631665	3.32143	0.750705	2.92224	2.98995	1.96079	6.17123	4.8465
protocatechuic acid	0.000447427	0.0834301	0.00105365	0.0818572	0.000676878	0.00479048	0.000746822	0.0119694	0.000563467	0.154408	0.00087277	0.036097	0.000794211	0.065191	0.00558876	0.117376	0.00835773	0.0878265	0.00138655	0.0334836	0.000729452	0.016815	0.0174819	0.0738088		protocatechuic acid	1.77507	0.781385	5.30418	1.43391	12.3475	18.3335	1.8566	2.79743	1.29458	0.1089	20.0304	2.04473
4-Hydroxyhydrocinnamic acid	0.00574802	0.00608183	0.00789817	0.00629931	0.00332491	0.00587501	0.00598791	0.00964078	0.0088213	0.00601166	0.00669362	0.0115837	0.0142493	0.00828213	0.0204196	0.0290282	0.0429895	0.028998	0.0348626	0.0154226	0.0645609	0.0349719	0.0118992	0.00995338		4-Hydroxyhydrocinnamic acid	2.47899	1.36178	2.58535	4.60815	12.9295	4.93582	5.82216	1.59973	7.31874	5.81734	1.7777	0.859254
Benzenepropanoic acid, 4-hydroxy-3-methoxy	0.00834621	0.00798331	0.0128339	0.0023041	0.00250169	0.00783735	0.00570348	0.00255593	0.0140072	0.000710148	0.0134079	0.00641532	0.00335412	0.0049801	0.00332561	0.00932945	0.0128068	0.00893804	0.0016611	0.00385125	0.00399783	0.0363739	0.00877723	0.0040578		Benzenepropanoic acid, 4-hydroxy-3-methoxy	0.401874	0.623815	0.259126	4.04907	5.11928	1.14044	0.291244	1.50679	0.285413	51.2201	0.654631	0.632517
Hydrocaffeic acid	0.0167395	0.0164588	0.028547	0.00701692	0.00591294	0.0129158	0.0215729	0.0157006	0.00534751	0.00285023	0.0217322	0.0447861	0.00314335	0.00570125	0.0389417	0.0237601	0.0485858	0.0148522	0.0543581	0.0244671	0.0595185	0.0254618	0.0138809	0.00683994		Hydrocaffeic acid	0.187781	0.346394	1.36413	3.38612	8.21686	1.14993	2.51975	1.55836	11.1301	8.93323	0.638723	0.152725
Coprostanol	0.075548	0.09953	0.0328564	0.0659081	0.0505934	0.0427053	0.0284794	0.162484	0.0772545	0.017399	0.0593345	0.0705976	0.173046	0.0517416	0.101124	0.0392582	0.0707776	0.0828504	0.119999	0.0954285	0.0903854	0.0355946	0.0734231	0.0702465		Coprostanol	2.29055	0.519859	3.07775	0.59565	1.39895	1.94005	4.21354	0.587308	1.16997	2.04578	1.23744	0.995027
L-Threonic acid	0.0243169	0.117046	0.0861026	0.0885268	0.0764381	0.0818552	0.110294	0.0641765	0.0584391	0.116785	0.0163289	0.0215199	0.00709062	0.00966646	0.00872773	0.0113094	0.00505344	0.00449638	0.00657798	0.00809272	0.00569988	0.0228928	0.00821125	0.00576909		L-Threonic acid	0.291592	0.0825867	0.101364	0.127751	0.0661115	0.0549309	0.0596406	0.126101	0.0975355	0.196025	0.502867	0.268081
Ribonic acid	0.00287681	0.00588924	0.00568785	0.00524476	0.00709065	0.00473148	0.00677524	0.00425148	0.00473512	0.00765836	0.00266446	0.00222926	0.00273466	0.00485052	0.00332689	0.00370229	0.00235915	0.00460914	0.00329517	0.00288069	0.00315801	0.00940605	0.00570071	0.00389208		Ribonic acid	0.950591	0.823623	0.584911	0.705903	0.332713	0.974143	0.486354	0.677574	0.666935	1.22821	2.13953	1.7459
L-Threitol	0.00309673	0.00402872	0.00958329	0.00236004	0.00298618	0.00466236	0.00457571	0.00282307	0.00682035	0.00212129	0.00447035	0.00427499	0.00118806	0.00987041	0.00217763	0.00769154	0.0048494	0.000951153	0.00174015	0.000955317	0.00191551	0.00837623	0.00678488	0.00364816		L-Threitol	0.383649	2.45001	0.227231	3.25907	1.62395	0.204007	0.380302	0.338396	0.280852	3.94865	1.51775	0.853374
Pinitol	0.177037	0.0370854	0.499283	0.0108954	0.0425681	0.180235	0.00787396	0.0256403	0.255355	0.011051	0.00719287	0.0268694	0.0174037	0.431087	0.0146252	0.0164509	0.0261905	0.260043	0.00783655	0.00746268	0.00812543	0.579724	0.560929	0.255095		Pinitol	0.0983053	11.6242	0.0292924	1.5099	0.615261	1.4428	0.995249	0.291052	0.0318202	52.4591	77.9841	9.49388
1,5-Anhydro-D-sorbitol	0.00363472	0.0105032	0.00694167	0.011645	0.00665815	0.0100631	0.0110937	0.00677758	0.00408248	0.0082031	0.000247946	0.00953306	0.000985731	0.00121878	0.00105506	0.0150106	0.000765435	0.00198942	0.00102922	0.00171987	0.000895684	0.00364239	0.0016475	0.00157478		1,5-Anhydro-D-sorbitol	0.271198	0.116039	0.15199	1.28901	0.114962	0.197694	0.0927753	0.253759	0.219397	0.444026	6.64458	0.165191
Ribitol	0.223418	0.169927	0.234632	0.125481	0.157506	0.218594	0.236219	0.137295	0.132117	0.369151	0.161971	0.178278	0.0326191	0.0687903	0.0198501	0.0264796	0.0247797	0.0156652	0.0165106	0.0266069	0.0298741	0.0503853	0.025575	0.0262748		Ribitol	0.146	0.404822	0.084601	0.211025	0.157326	0.0716634	0.0698956	0.193794	0.226118	0.13649	0.157898	0.147381
Myoinositol-1	0.00214628	0.00195793	0.00270555	0.00144726	0.00192172	0.00233387	0.00254386	0.00208735	0.00166065	0.00381946	0.00183774	0.00151975	0.000774504	0.00145353	0.00105532	0.00109909	0.000827212	0.0010418	0.00103296	0.00496692	0.000911043	0.00247826	0.00168039	0.00128859		Myoinositol-1	0.360859	0.742381	0.390056	0.759431	0.430455	0.446384	0.406062	2.37953	0.548605	0.64885	0.914376	0.847897
Myoinositol-2	0.0260318	0.0150024	0.0598761	0.0025147	0.0103096	0.0260208	0.00264877	0.00441314	0.0345865	0.00180389	0.00242734	0.0048643	0.0027704	0.0255201	0.0133347	0.00294638	0.0137396	0.0148518	0.0240772	0.00109675	0.0200762	0.0620832	0.0601121	0.0277011		Myoinositol-2	0.106424	1.70106	0.222705	1.17166	1.3327	0.570767	9.08998	0.24852	0.580465	34.4163	24.7646	5.69479
Myoinositol-3	0.000613944	0.0619919	0.00110036	0.056531	0.000865005	0.00403396	0.00116252	0.00950341	0.000887174	0.107631	0.00114324	0.0255751	0.00110515	0.0509126	0.00763065	0.0873469	0.00965976	0.0657967	0.00175638	0.0274175	0.000994697	0.0136242	0.0233188	0.0503223		Myoinositol-3	1.80009	0.821279	6.9347	1.54512	11.1673	16.3107	1.51084	2.88502	1.1212	0.126582	20.3971	1.96763
Maltitol	0.0433049	0.00765098	0.0188665	0.0135549	0.012416	0.00998714	0.0100851	0.0130608	0.0094508	0.00520362	0.0168747	0.0161498	0.130464	0.0739582	0.119151	0.371436	0.245509	0.215127	0.136344	0.0686803	0.229271	0.667165	0.164445	0.115156		Maltitol	3.01269	9.66651	6.31549	27.4022	19.7736	21.5404	13.5193	5.25849	24.2594	128.212	9.74505	7.13053
Glycerol	0.795419	0.93327	0.759103	0.79994	0.946507	0.902313	1.04133	0.95955	0.695386	0.992825	0.985382	1.27914	0.425933	0.377811	0.426947	0.382483	0.279368	0.472887	0.337824	0.347399	0.320572	0.478622	0.333888	0.367507		Glycerol	0.535483	0.404825	0.562435	0.47814	0.295156	0.524083	0.324415	0.362044	0.460999	0.482081	0.338841	0.287309
Xylulose	0.00240598	0.0028177	0.00494245	0.00200601	0.000666396	0.00380551	0.0018384	0.00274652	0.00282053	0.00986469	0.00449145	0.00296237	0.00302319	0.00383061	0.0113621	0.0119266	0.00457369	0.00865953	0.00938428	0.00970004	0.00289699	0.0129446	0.0060453	0.00301372		Xylulose	1.25653	1.35948	2.29888	5.94546	6.86333	2.27553	5.10458	3.53175	1.02711	1.31221	1.34596	1.01733
Arabinose-1	0.258107	0.054226	0.236772	0.127006	0.35309	0.120286	0.330084	0.11015	0.16916	0.162806	0.106466	0.161767	0.0694527	0.0528412	0.0589909	0.0242606	0.1072	0.0321682	0.0806767	0.03389	0.0507639	0.0578027	0.034905	0.0362567		Arabinose-1	0.269085	0.974461	0.249146	0.191019	0.303604	0.267431	0.244412	0.307673	0.300094	0.35504	0.327853	0.22413
Arabinose-2	0.469879	0.378612	0.450046	0.243324	0.355405	0.432986	0.471105	0.334246	0.328525	0.534929	0.301537	0.356095	0.0817196	0.143526	0.0928253	0.0636814	0.076018	0.043388	0.0526554	0.0788762	0.10899	0.111182	0.0920616	0.0800618		Arabinose-2	0.173916	0.379084	0.206258	0.261715	0.213891	0.100206	0.11177	0.235982	0.331755	0.207844	0.305308	0.224833
Ribose	0.180475	0.359528	0.237641	0.172083	0.219386	0.195937	0.339483	0.192079	0.186486	0.311205	0.212056	0.256991	0.0399527	0.0391661	0.0585456	0.031062	0.0360933	0.0338362	0.0274228	0.0478021	0.0432829	0.0694311	0.056006	0.0649707		Ribose	0.221375	0.108937	0.246361	0.180506	0.164519	0.172689	0.080778	0.248866	0.232098	0.223104	0.26411	0.252813
Ribofuranose (isomer 2)	0.0808144	0.0621184	0.103675	0.0455493	0.078652	0.0829928	0.0969683	0.0543008	0.0574974	0.107973	0.0587279	0.0497837	0.0239762	0.0467134	0.0343694	0.0248336	0.0254108	0.0150051	0.0137088	0.0193511	0.0407354	0.0306003	0.0380495	0.0242516		Ribofuranose (isomer 2)	0.296683	0.752006	0.331511	0.545203	0.323079	0.1808	0.141374	0.356368	0.708473	0.283407	0.647895	0.487139
Arabinose-3	0.922207	0.539202	0.581331	0.435896	0.517577	0.80419	0.561697	0.588595	0.666173	0.514528	0.73624	0.635264	0.0949508	0.132717	0.118422	0.0472262	0.139514	0.039534	0.116027	0.190412	0.144245	0.0817749	0.100899	0.0943557		Arabinose-3	0.10296	0.246135	0.203708	0.108343	0.269551	0.04916	0.206564	0.323502	0.216529	0.158932	0.137047	0.14853
Fructofuranose (isomer 1)	0.0292211	0.0501602	0.032873	0.0217436	0.0655244	0.0265399	0.0567281	0.0178309	0.01453	0.0244557	0.0181884	0.0181677	0.00213661	0.0107072	0.00511926	0.00642969	0.00488571	0.00592	0.00355219	0.00602703	0.00583772	0.00963222	0.0101689	0.00982764		Fructofuranose (isomer 1)	0.0731189	0.21346	0.155728	0.295706	0.0745632	0.22306	0.0626179	0.33801	0.401771	0.393864	0.559086	0.54094
Glucopyranose-1	0.0869039	0.0841066	0.0685454	0.0444403	0.0865309	0.0609347	0.0854738	0.0372893	0.0391753	0.0684376	0.0771513	0.0648028	0.00991375	0.0140376	0.00934118	0.00984386	0.012028	0.00966896	0.0104755	0.0106689	0.0101302	0.0243257	0.013829	0.019332		Glucopyranose-1	0.114077	0.166902	0.136277	0.221507	0.139002	0.158677	0.122559	0.286112	0.258585	0.355444	0.179245	0.29832
Glucose	0.00278483	0.00171406	0.00880256	0.00258824	0.00146311	0.00274661	0.00195672	0.00405736	0.00502085	0.000723307	0.00212471	0.00512532	0.0274868	0.00533669	0.0222176	0.00722843	0.0285849	0.0252003	0.00956379	0.0123016	0.0144523	0.00607407	0.0240088	0.0253261		Glucose	9.87018	3.11348	2.52399	2.7928	19.5371	9.17508	4.88766	3.03193	2.87847	8.39764	11.2998	4.94137
Talofuranose (isomer 1)	0.0694801	0.436156	0.103149	0.270675	0.0916027	0.231164	0.125509	0.213106	0.0585394	0.369856	0.0614405	0.227167	0.0145252	0.0622329	0.0322836	0.040056	0.0240851	0.023703	0.0180025	0.0505206	0.044157	0.0936628	0.0894874	0.096599		Talofuranose (isomer 1)	0.209056	0.142685	0.312979	0.147986	0.262931	0.102537	0.143437	0.237068	0.754313	0.253241	1.45649	0.425234
Glucose-1	0.0245707	0.0146296	0.0214907	0.00776329	0.00892071	0.0177343	0.0201637	0.0136617	0.0150413	0.0184628	0.0157221	0.0265175	0.0148801	0.031475	0.0288371	0.0447489	0.0260384	0.0200501	0.0222698	0.0211061	0.0545001	0.0662048	0.0620475	0.0574932		Glucose-1	0.605601	2.15146	1.34184	5.76416	2.91887	1.13058	1.10445	1.54491	3.62338	3.58586	3.94651	2.16812
Glucose-2	2.42506	2.58531	2.37825	1.8221	2.17642	1.77566	3.20963	1.76829	1.77817	2.31237	1.60456	2.64394	0.196639	0.488107	0.223912	0.264744	0.2578	0.178402	0.257262	0.42716	0.33397	0.681461	0.53224	0.810955		Glucose-2	0.0810865	0.1888	0.0941498	0.145296	0.118451	0.100471	0.0801533	0.241566	0.187817	0.294702	0.331704	0.306722
Glucopyranose-2	0.505658	0.426765	0.502494	0.329596	0.337093	0.542411	0.509184	0.36447	0.288655	0.862932	0.349063	0.45469	0.0757066	0.149116	0.0538478	0.0628818	0.0621284	0.0354166	0.0392037	0.0648424	0.0767167	0.107144	0.0675119	0.0654515		Glucopyranose-2	0.149719	0.34941	0.107161	0.190785	0.184306	0.0652948	0.0769932	0.177909	0.265773	0.124162	0.193409	0.143948
Glucopyranose	3.46168	3.31681	3.43007	2.36449	3.20191	2.29663	4.52058	2.36101	2.662	2.8126	2.33264	3.54865	0.279178	0.659073	0.340909	0.368666	0.386863	0.256017	0.389166	0.589917	0.482074	0.916197	0.830261	1.12053		Glucopyranose	0.080648	0.198707	0.0993883	0.155918	0.120822	0.111475	0.0860876	0.249858	0.181094	0.325748	0.355932	0.315762
Trehalose	0.00681798	0.00613415	0.00964643	0.00356377	0.00834863	0.00572693	0.011294	0.006584	0.0074336	0.0107115	0.00653889	0.00713669	0.00555731	0.00630113	0.00381729	0.00509133	0.00308224	0.00628122	0.00540474	0.00965005	0.00445684	0.00820407	0.00530524	0.00518179		Trehalose	0.815096	1.02722	0.395721	1.42864	0.369191	1.09679	0.478552	1.46568	0.599553	0.76591	0.811337	0.726078
Cellobiose (isomer 1)	0.0410232	0.0452893	0.0597908	0.0210041	0.0733214	0.020492	0.112805	0.0416672	0.0498557	0.0538504	0.0333924	0.0551716	0.0715226	0.0198855	0.0795503	0.0493888	0.0547814	0.0542161	0.109787	0.098577	0.0538105	0.0379491	0.0596201	0.0858076		Cellobiose (isomer 1)	1.74347	0.439078	1.33048	2.35139	0.74714	2.64572	0.973247	2.36582	1.07932	0.704713	1.78544	1.55529
Cellobiose (isomer 2)	0.0529865	0.0762249	0.0682754	0.0292175	0.108951	0.0258446	0.188456	0.0707104	0.058342	0.0776019	0.0329814	0.06878	0.120447	0.0379073	0.130192	0.0877356	0.0775833	0.0988024	0.165575	0.189244	0.0767153	0.0633334	0.0859968	0.142784		Cellobiose (isomer 2)	2.27316	0.497309	1.90687	3.00284	0.71209	3.82294	0.878587	2.67632	1.31493	0.816132	2.60743	2.07595

## Sheet: Metabolite_classes_levels
## Normalized levels and ratios grouped by metabolite classes (upper table) and metabolome clusters (lower table)
	## Metabolite levels, normalized to xylitol																									## Normalized metabolite levels, week 4/week 0 ratios
	Control group												Untreated			Pom			BaP			PomBap					Untreated			Pom			BaP			PomBap
Metabolyte Classes	Wk0_C01_U	Wk0_C02_U	Wk0_C03_U	Wk0_C04_P	Wk0_C05_P	WK0_C06_P	Wk0_C07_B	Wk0_C08_B	Wk0_C09_B	Wk0_C10_PB	Wk0_C11_PB	Wk0_C12_PB	Wk04_C01_U	Wk04_C02_U	Wk04_C03_U	Wk04_C04_P	Wk04_C05_P	Wk04_C06_P	Wk04_C07_B	Wk04_C08_B	Wk04_C09_B	Wk04_C10_PB	Wk04_C11_PB	Wk04_C12_PB		Metabolyte Classes	Wk04_C01_U	Wk04_C02_U	Wk04_C03_U	Wk04_C04_P	Wk04_C05_P	Wk04_C06_P	Wk04_C07_B	Wk04_C08_B	Wk04_C09_B	Wk04_C10_PB	Wk04_C11_PB	Wk04_C12_PB
Acids	1.46551	1.12811	2.09976	0.896679	1.49703	1.59782	1.77457	1.03924	1.7194	0.916199	1.48201	1.39177	1.53675	1.39669	1.79859	1.18356	1.57896	1.05854	1.86654	1.17318	2.11105	1.45029	1.84925	1.05636		Acids	1.04861	1.23808	0.856569	1.31994	1.05473	0.662488	1.05183	1.12888	1.22778	1.58294	1.2478	0.759001
Alcohols	0.237819	0.631036	0.26832	0.535336	0.283603	0.505189	0.398612	0.533578	0.247212	0.498541	0.251819	0.485942	0.149003	0.241958	0.135028	0.452885	0.0978902	0.23734	0.145265	0.184707	0.175616	0.409492	0.147013	0.188091		Alcohols	0.62654	0.383429	0.503236	0.845984	0.345166	0.469804	0.364426	0.346167	0.710387	0.82138	0.583804	0.387065
Aliphatic hydrocarbons	0.0693102	0.0671749	0.101948	0.0953489	0.107973	0.0796226	0.105866	0.0718571	0.079992	0.0671446	0.0695141	0.0682186	0.123961	0.138265	0.0740796	0.0793324	0.115545	0.107065	0.130781	0.106619	0.129633	0.111656	0.0559947	0.108431		Aliphatic hydrocarbons	1.7885	2.05828	0.726639	0.832022	1.07013	1.34466	1.23534	1.48376	1.62057	1.66292	0.805517	1.58946
Amino acids	0.730613	1.38798	1.29462	2.03178	1.18859	1.5696	1.40658	1.32587	0.811986	1.25147	0.723848	1.63162	0.435469	0.832527	0.414448	1.40888	0.364767	0.812449	0.493514	0.669927	0.420822	1.58808	0.550587	0.78255		Amino acids	0.596032	0.59981	0.320131	0.69342	0.306891	0.517615	0.350861	0.505275	0.518263	1.26897	0.760638	0.479615
Amino Sugars	0.0292043	0.0524024	0.0366456	0.0397433	0.035979	0.0557666	0.0478466	0.053189	0.0416605	0.0242106	0.0434754	0.0749519	0.0064891	0.0145935	0.00984498	0.0120435	0.00786899	0.00630807	0.0141966	0.0128149	0.0108918	0.0120196	0.0119389	0.0122539		Amino Sugars	0.222197	0.278489	0.268654	0.303032	0.218711	0.113116	0.296712	0.240931	0.261442	0.496461	0.274612	0.163491
Aromatic hydrocarbons	0.206912	1.95958	0.04807	2.22083	0.34432	1.11144	0.342816	2.04234	0.254702	1.7278	0.235371	1.26671	0.403667	1.86235	0.384865	3.02832	0.128586	3.64404	0.419424	1.8759	0.386857	2.07539	0.337935	2.53673		Aromatic hydrocarbons	1.95091	0.950382	8.00635	1.3636	0.373448	3.27868	1.22347	0.918505	1.51886	1.20117	1.43575	2.00262
Fatty acids and fatty acid esters	1.80727	2.02544	1.91393	2.29891	2.20373	1.63511	1.99179	1.6553	1.69784	2.11319	3.08028	2.64036	2.91452	2.38006	2.59131	2.42851	2.19476	2.91276	2.76993	2.66484	2.18657	2.29958	2.1279	2.12871		Fatty acids and fatty acid esters	1.61266	1.17508	1.35393	1.05638	0.995928	1.78139	1.39068	1.60988	1.28785	1.08821	0.690814	0.80622
Nitrogenous compounds	0.0655661	0.182818	0.109275	0.0790882	0.15316	0.0791457	0.198772	0.0849274	0.0780181	0.131938	0.0838799	0.154216	0.00708944	0.0165803	0.0262054	0.0326593	0.015437	0.0213931	0.0240473	0.0253471	0.0230638	0.0310664	0.0318281	0.0296897		Nitrogenous compounds	0.108127	0.0906934	0.23981	0.412948	0.10079	0.2703	0.120979	0.298456	0.295621	0.235462	0.379449	0.19252
Phenolic acids	0.0833817	0.118572	0.232447	0.100947	0.396989	0.0358264	0.233482	0.0445098	0.0981084	0.170982	0.0801352	0.102224	0.205324	0.0958651	0.292338	0.19451	0.355661	0.155255	0.242012	0.0907927	0.336216	0.127351	0.28302	0.110857		Phenolic acids	2.46246	0.8085	1.25765	1.92685	0.895897	4.33353	1.03653	2.03984	3.42698	0.744822	3.53178	1.08445
Sterols	0.075548	0.09953	0.0328564	0.0659081	0.0505934	0.0427053	0.0284794	0.162484	0.0772545	0.017399	0.0593345	0.0705976	0.173046	0.0517416	0.101124	0.0392582	0.0707776	0.0828504	0.119999	0.0954285	0.0903854	0.0355946	0.0734231	0.0702465		Sterols	2.29055	0.519859	3.07775	0.59565	1.39895	1.94005	4.21354	0.587308	1.16997	2.04578	1.23744	0.995027
Sugar acids	0.0271937	0.122935	0.0917904	0.0937716	0.0835287	0.0865867	0.117069	0.068428	0.0631742	0.124444	0.0189933	0.0237492	0.00982529	0.014517	0.0120546	0.0150117	0.00741258	0.00910552	0.00987315	0.0109734	0.00885789	0.0322989	0.013912	0.00966117		Sugar acids	0.361308	0.118086	0.131328	0.160088	0.088743	0.105161	0.0843362	0.160364	0.140214	0.259546	0.732466	0.4068
Sugar alcohols	0.479284	0.308148	0.832989	0.224429	0.23523	0.45593	0.276202	0.2016	0.44496	0.508984	0.196165	0.267064	0.187311	0.662811	0.17888	0.528461	0.326321	0.575466	0.190327	0.138906	0.292063	1.38748	0.844493	0.481061		Sugar alcohols	0.390814	2.15095	0.214745	2.35469	1.38724	1.26218	0.689086	0.689018	0.656382	2.72598	4.305	1.80129
Sugars	9.41549	9.37308	9.0569	6.74298	8.63138	7.54839	11.6843	7.14034	7.08281	9.24613	6.9387	9.86216	1.557	2.28078	1.73149	1.53229	1.60604	1.35916	1.66796	2.20744	1.86831	2.85654	2.44233	3.1097		Sugars	0.165366	0.243333	0.191179	0.227242	0.18607	0.180059	0.142753	0.309151	0.26378	0.308945	0.351987	0.315317
MetaboCluster 1	10.5059	11.7503	10.8576	9.52271	10.3762	9.84468	13.8532	9.20633	8.32486	11.2767	8.06072	12.2326	2.16488	3.40096	2.32907	3.45377	2.09941	2.44575	2.35486	3.11121	2.50756	4.9295	3.19761	4.13195		MetaboCluster 1	0.206063	0.289437	0.214512	0.362688	0.202329	0.248434	0.169987	0.337943	0.301213	0.437139	0.39669	0.337781
MetaboCluster 2	2.0835	4.0522	2.06394	4.61509	2.65603	2.82617	2.44047	3.7695	2.03253	3.90814	3.38517	3.97528	3.44215	4.38068	3.05026	5.53617	2.43889	6.66387	3.32014	4.64736	2.70306	4.48664	2.52183	4.77387		MetaboCluster 2	1.6521	1.08106	1.47788	1.19958	0.918248	2.35792	1.36045	1.23289	1.3299	1.14802	0.744965	1.20089
Sugar alcohols	0.479284	0.308148	0.832989	0.224429	0.23523	0.45593	0.276202	0.2016	0.44496	0.508984	0.196165	0.267064	0.187311	0.662811	0.17888	0.528461	0.326321	0.575466	0.190327	0.138906	0.292063	1.38748	0.844493	0.481061		Sugar alcohols	0.390814	2.15095	0.214745	2.35469	1.38724	1.26218	0.689086	0.689018	0.656382	2.72598	4.305	1.80129
MetaboCluster 1	Alcohols, Amino acids, Amino Sugars, Sugar acids, Sugars, Nitrogenous compounds
MetaboCluster 2	Aliphatic hydrocarbons, Aromatic hydrocarbons, Fatty acids and fatty acid esters
