# Supplementary material for: Integrating Microbiome Analysis, Metabolomics, Bioinformatics, and Histopathology to Elucidate the Protective Effects of Pomegranate Juice against Benzo-alpha-pyrene-Induced Colon Pathologies
Source: Int J Mol Sci. 2023 Jun 27;24(13):10691. doi: 10.3390/ijms241310691 (PMC10341650; doi:10.3390/ijms241310691)
Supplement: Supplementary file 1 [file ijms-24-10691-s001.zip › HA_PomBaP_Supplementary_Data_S3.xlsx]

## Sheet: CorrelationMatrix1
## Microbiome-metabolome Spearman correlation matrix: the microbiome is classified at the genus level and all identified metabolites are listed
## A filter is set at a threshold of Spearman correlation of ± 0.5
	Prevotellaceae_g_unclassified	Helicobacter	Gastranaerophilales_f_g_unclassified	Actinobacteria_class12_o_f_g_unclassified	Bacteroidetes_c_o_f_g_unclassified	Coriobacteriaceae_UCG-002	Coriobacteriaceae_g_unclassified	Prevotellaceae_NK3B31_group	Lachnospiraceae_NK4A136_group	Ruminiclostridium_9	Prevotellaceae_Ga6A1_group	Lachnospiraceae_g_unclassified	Holdemania	Anaeroplasma	Enterobacteriaceae_g_unclassified	Proteobacteria_o_f_g_unclassified	Senegalimassilia	Firmicutes_c_o_f_g_unclassified	Bacteroides	p-2534-18B5_gut_group_g_unclassified	Family_XIII_AD3011_group	Erysipelotrichaceae_g_unclassified	Streptococcus	Veillonellaceae_g_unclassified	Prevotellaceae_UCG-003	Treponema_2	Anaerotruncus	Gammaproteobacteria_o__f_g_unclassified	Ruminococcus_1	Prevotellaceae_UCG-001	Butyricimonas	Bacilli_o_f_g_unclassified	Collinsella	Parabacteroides	Adlercreutzia	Bacteroidia_o_f_g_unclassified	Phascolarctobacterium	Lactobacillales_f_g_unclassified	Ruminococcaceae_g_unclassified	Ruminococcaceae_UCG-013	Clostridia_o_f_g_unclassified	Selenomonadales_f_g_unclassified	[Eubacterium]_coprostanoligenes_group	Turicibacter	Acidaminococcaceae_g_unclassified	Alloprevotella	Allobaculum	Ruminococcaceae_UCG-005	Enterorhabdus
Butyric acid	0.140784	-0.244375	0.0186927	-0.281673	-0.025559	-0.180899	-0.208539	-0.0299417	0.0351948	0.0218252	-0.145612	0.0200027	0.138216	0.383219	-0.278847	-0.00966167	-0.12181	0.205422	0.0592733	0.0420012	-0.0688597	0.133812	0.0417588	0.216029	0.0576368	0.0358444	0.0373035	-0.20042	0.389827	-0.0372689	-0.423281	-0.159336	0.143371	-0.0727605	-0.130247	0.0908753	-0.0131049	-0.016277	0.320222	0.308643	0.00604432	-0.0940657	-0.0102429	-0.116004	0.0398139	0.229308	-0.116777	0.182475	-0.33692
Isovaleric acid	-0.0325957	-0.123266	0.0899172	-0.0403468	-0.0711738	-0.189516	0.0376694	0.0792969	-0.0616027	0.0563717	0.186954	-0.0334054	0.0512246	-0.206538	-0.21358	0.126259	0.374492	0.0867066	0.0178325	0.226024	0.168935	0.114227	0.0230112	-0.196485	0.0643566	0.130975	-0.0877676	0.255299	-0.0121097	-0.380888	-0.201297	-0.227468	0.262103	0.220209	0.427252	0.260514	0.209654	-0.330539	-0.0914099	0.284995	0.141249	0.247779	0.160347	0.387383	0.242516	-0.347861	0.0439329	0.155928	0.147468
Propionic acid	0.0617866	-0.124375	-0.00867692	0.0302249	-0.1274	-0.0734971	-0.155456	0.0282706	-0.161011	0.0225152	-0.045081	-0.0752002	0.309168	0.260989	-0.188243	0.0705907	0.241246	-0.0663672	-0.0840886	-0.196151	-0.0295494	0.237114	-0.158676	-0.183876	-0.113298	0.0662335	-0.0175806	0.0227156	0.412574	0.302331	-0.123481	-0.0535498	-0.173216	0.198609	-0.215105	-0.0726676	0.0274868	-0.130376	0.0207014	0.205201	-0.156995	0.0539794	-0.119254	0.0370599	-0.070126	0.446263	0.0659424	0.0584759	-0.11369
Valeric acid	-0.186887	0.043892	0.258896	-0.0777937	-0.00730367	-0.190391	-0.0414071	-0.123618	0.0378246	0.136204	0.447776	0.213669	0.18486	-0.0167955	-0.200083	0.312849	0.179475	-0.0174106	0.106886	0.135266	0.0998812	0.0224897	-0.0676731	-0.153388	0.0546204	0.226809	0.122073	0.388818	0.248138	-0.327856	-0.101629	-0.369502	0.108777	0.277708	0.0860849	0.25878	0.158129	-0.448426	0.279162	0.45378	0.280839	0.0668799	0.221035	-0.0432179	0.0562769	-0.310914	-0.047151	0.221713	-0.00819155
Lactic acid	-0.21721	-0.0770463	-0.306626	-0.0858036	-0.383345	0.00412533	0.112044	-0.0392858	0.0398027	-0.00999093	0.0636638	-0.0757277	0.332454	0.19832	-0.264327	0.0848923	0.0577858	0.305005	0.0142863	0.498324	0.2615	0.314928	0.087444	0.0333283	-0.385778	0.0761004	-0.223025	0.0711186	-0.127154	-0.276322	-0.224203	0.426953	0.253161	-0.0961788	0.287857	-0.151685	0.18148	0.43488	-0.153959	0.344935	0.305629	0.124064	0.122507	0.128309	0.344715	-0.14516	0.238498	-0.0450714	0.136654
Caproic acid	-0.323041	0.104463	0.141058	-0.00503863	-0.0716337	0.0590765	0.1643	-0.250054	0.234682	0.185331	0.263324	0.266779	0.0778804	0.123952	0.00890509	0.124822	-0.051695	0.102297	-0.11808	0.0880531	-0.0102897	-0.0149686	0.0866521	0.207027	0.0865982	0.0582433	-0.0579183	0.170765	0.0332503	-0.244791	-0.0714199	0.0566565	-0.114557	-0.0869649	0.122698	-0.0570416	-0.247594	0.0153823	0.187546	0.126985	0.224927	-0.308127	0.00979641	-0.0561624	-0.300907	-0.265282	0.181037	-0.302606	0.196769
Glycolic acid	0.00282385	-0.180339	-0.00698975	0.072331	-0.112859	-0.158945	0.107597	-0.0137448	-0.0684243	-0.0385554	-0.208551	-0.35834	-0.00203224	-0.180026	-0.0268903	-0.32956	0.150187	0.0206024	-0.270181	0.0666572	0.162168	-0.0650766	0.166181	0.140311	0.208537	-0.115957	-0.511487	-0.209789	-0.44837	-0.252862	-0.0186262	0.246533	-0.00154211	-0.273151	0.495042	-0.0123359	-0.0724697	0.177242	-0.46502	-0.24945	-0.155901	0.0239529	0.0489681	0.255335	0.138261	-0.202814	0.0909163	-0.10912	0.215211
alpha-Hydroxybutyric acid	-0.0128932	-0.0223411	-0.307081	0.172435	-0.139352	0.0188315	0.00157497	-0.0516325	-0.225152	-0.0752545	-0.164248	-0.456531	0.179399	-0.226447	0.0358778	-0.488593	-0.0537712	0.232278	0.0238675	-0.0097374	0.30065	0.127324	0.352411	0.164132	-0.0334528	-0.410501	-0.475585	-0.19832	-0.406795	-0.219786	-0.12022	0.520956	-0.0427626	-0.169701	0.381154	-0.262795	-0.021927	0.563234	-0.575855	-0.269703	-0.271064	0.154593	-0.131719	0.278923	0.135542	-0.259414	0.285751	-0.0838074	0.21568
beta-Lactic acid	0.142358	-0.269005	-0.240013	-0.107079	-0.00744154	0.011103	-0.0812736	0.0722691	0.209932	-0.109709	-0.16167	-0.00596773	-0.0699573	0.101652	0.0446365	0.198346	-0.290294	-0.159994	-0.0169617	-0.106241	-0.3486	-0.134733	-0.125764	0.124723	0.0383052	-0.168417	0.0858009	-0.199908	0.0379428	0.292667	0.0197548	0.029245	-0.138742	-0.159923	-0.00896997	-0.131696	-0.341621	0.292093	-0.0717579	-0.160941	-0.434193	-0.385948	-0.301522	-0.251016	-0.254874	0.62423	-0.189943	-0.270844	-0.0255516
2-Hydroxyvaleric acid	0.127526	0.00036561	-0.0953793	0.102713	-0.16204	0.0103163	-0.268973	0.0525359	-0.386708	-0.190001	-0.0954215	-0.285947	0.465925	-0.192476	0.103152	-0.244397	0.0599385	0.126964	0.261257	-0.147025	0.180801	0.151234	0.283467	0.10562	-0.0824564	-0.344375	-0.00275163	0.0127059	-0.000729133	0.00715726	-0.0428935	0.0145468	0.183571	0.16309	-0.150686	-0.366032	0.249868	0.143801	-0.343563	0.151557	-0.190827	0.395974	-0.163083	0.0602484	0.220594	-0.116793	0.0293056	0.29484	-0.114215
2-Aminobutyric acid	-0.0150255	0.000676797	-0.296587	0.349255	0.134165	0.116997	0.199883	0.18927	-0.0944759	-0.0155122	-0.199827	-0.219373	-0.0815104	-0.250291	0.245987	-0.255515	0.0643871	-0.0135756	0.0145868	-0.11017	0.189319	-0.0908941	0.365313	0.0248526	-0.21804	-0.304255	-0.250482	-0.11738	-0.483664	0.0834131	-0.046684	0.440823	-0.128231	-0.104985	0.269231	-0.301689	-0.0879599	0.506635	-0.453276	-0.529511	-0.187459	0.0647508	-0.456392	0.375643	0.0348765	-0.0472819	0.178111	-0.318212	0.488982
gamma-Hydroxybutyric acid	0.159704	-0.209714	0.11129	-0.260961	-0.00359305	-0.157985	-0.250478	0.0155654	-0.0279196	0.00604867	-0.113353	-0.00330183	0.134417	0.273004	-0.318111	-0.0556993	-0.0794344	0.178891	0.101837	-0.0102604	-0.0647234	0.231245	0.0452341	0.0830856	0.0520901	0.0521999	0.0202569	-0.0989865	0.441327	-0.0557128	-0.44541	-0.225675	0.0682761	-0.025658	-0.1342	0.203238	0.0447328	-0.135559	0.282583	0.310535	-0.0310115	-0.015548	0.0565722	-0.0399141	0.0652081	0.170126	0.0131125	0.268183	-0.366015
2-Hydroxyisocaproic acid	0.132177	0.0290417	-0.290988	0.153532	-0.205996	0.108937	-0.106577	0.1069	-0.28913	-0.173041	-0.152472	-0.360421	0.344636	-0.278367	0.0896957	-0.40535	0.0344833	0.159347	0.20863	-0.103723	0.175247	0.184843	0.298388	0.106285	-0.0630842	-0.510283	-0.235584	-0.0919607	-0.177137	0.0399319	-0.029421	0.347383	-0.00134177	0.0606071	0.0972601	-0.483534	0.0592899	0.458813	-0.596525	-0.113622	-0.307839	0.281291	-0.25592	0.311692	0.0756557	-0.110002	0.209551	-0.0143121	0.191801
Succinic acid	-0.174343	0.161027	-0.0506514	-0.0399896	-0.0971202	0.082407	0.231132	-0.224884	-0.00811631	-0.199739	-0.240006	0.24057	-0.151105	-0.0669104	0.113112	-0.129895	-0.366884	-0.106996	-0.0509154	-0.0143532	-0.389318	-0.126771	-0.199261	0.176429	-0.139712	-0.203784	0.211362	-0.262642	-0.164982	0.518594	0.230995	0.157087	0.0726822	-0.168716	-0.0355191	-0.249082	0.0257249	0.214023	-0.0360429	-0.212375	-0.14598	-0.0198699	-0.295172	-0.270251	0.00591683	0.176443	-0.0989946	-0.340636	0.127288
4-Hydroxybutyric acid	-0.0123188	0.0950391	-0.0620296	-0.0311032	-0.0400716	-0.236115	-0.0443825	-0.0347694	-0.42494	-0.131701	-0.0773017	-0.133798	0.170125	-0.274783	-0.248145	-0.283735	0.00620802	-0.00612151	0.315792	-0.11239	0.0976564	0.157819	0.254145	-0.0297715	-0.171911	-0.235223	-0.10728	0.0464203	-0.148881	0.132959	-0.14389	-0.110578	0.00520098	0.140419	0.143121	-0.0196574	0.341827	-0.0591187	-0.251436	0.0830259	-0.229441	0.386251	-0.173978	0.168922	0.321025	-0.15864	0.0967146	0.311419	0.0797384
Decanoic acid	-0.0219299	-0.0169905	-0.20887	0.202786	0.0507221	-0.0555711	0.0481253	0.311391	-0.429598	-0.105789	-0.0119777	-0.412651	0.272808	-0.24774	0.0256805	-0.142259	0.183023	0.0795118	0.259505	-0.257992	0.318931	0.187748	0.361975	-0.22247	-0.435687	-0.0322929	-0.138328	0.211475	-0.437585	-0.242342	-0.246534	0.320707	0.0710411	-0.0196326	0.195843	-0.0704706	0.319893	0.288678	-0.358056	-0.121704	0.114498	0.393719	-0.276741	0.325449	0.487367	-0.220987	0.35105	0.163137	0.240124
Tartaric acid	-0.163971	-0.153057	-0.0264603	0.249586	0.00674923	0.17216	0.237041	-0.283791	0.259511	-0.322102	-0.242501	-0.101115	-0.0277846	-0.014506	0.258225	-0.376096	-0.212139	-0.193059	-0.290676	0.178213	-0.142436	-0.172585	-0.0695828	0.406308	0.307868	-0.253365	-0.427396	-0.400499	0.0697796	0.0372308	0.00818382	0.511014	-0.143762	-0.497477	0.124806	-0.360965	-0.587843	0.589381	-0.365009	-0.293352	-0.421918	-0.598241	-0.280512	-0.197324	-0.484864	0.062562	-0.0222905	-0.320555	0.223318
beta-Phenyllactic acid	0.0576217	-0.0428221	-0.356164	0.219801	-0.0929159	-0.026955	0.0392418	0.234686	-0.24916	-0.142736	-0.191344	-0.261938	0.281677	-0.133221	-0.00731339	-0.149794	0.0550908	0.267833	0.236491	-0.0538026	0.257883	0.163835	0.424866	0.0878889	-0.368484	-0.267088	-0.133768	0.0711153	-0.305539	0.00614194	-0.261899	0.426421	0.120462	-0.0105576	0.249988	-0.341796	0.206132	0.557899	-0.419658	-0.148993	-0.140537	0.345683	-0.403862	0.298753	0.368838	0.00920468	0.312896	-0.0742333	0.223389
3-Hydroxyphenylacetic acid	-0.0492821	-0.195029	0.124693	-0.23157	-0.146039	-0.127102	-0.236592	0.234188	-0.214391	0.300203	0.0782146	0.00824233	0.320002	0.150219	-0.201169	0.21753	0.418371	0.274711	-0.0173123	-0.0180802	0.363885	0.325984	0.293638	-0.204459	-0.262963	0.408048	0.133908	0.298144	0.086158	-0.403085	-0.258104	-0.396643	0.336274	0.189242	-0.236811	0.0687807	0.372669	-0.48128	0.313124	0.522733	0.611732	0.378356	0.0431385	0.357063	0.390871	-0.340242	-0.00614447	0.224191	-0.106969
p-Hydroxyphenylacetic acid	-0.189812	-0.0485144	-0.162324	0.208944	-0.146405	0.351681	0.245473	-0.326702	0.154573	-0.196859	-0.239204	-0.0441195	-0.175292	-0.016257	0.462516	-0.292755	-0.438854	-0.0384443	-0.401865	-0.0217637	-0.350941	-0.165875	-0.174359	0.39963	0.215731	-0.334989	-0.136155	-0.440298	-0.170993	0.194322	0.234222	0.5441	-0.0712303	-0.484746	0.0655989	-0.435038	-0.510594	0.555486	-0.257945	-0.476984	-0.340229	-0.50436	-0.336058	-0.295616	-0.416636	0.151163	-0.0123998	-0.627357	0.1889
Ribofuranose (isomer 1)	-0.0723478	0.0189285	-0.0608533	0.0619638	-0.13567	0.130057	0.212704	-0.30584	0.212969	-0.289001	-0.207844	0.0840274	-0.0950244	-0.076196	0.244781	-0.271316	-0.468404	-0.153797	-0.215477	-0.0263532	-0.453087	-0.274691	-0.246667	0.469775	0.3997	-0.408814	-0.110181	-0.381441	-0.0426561	0.354181	0.306898	0.362607	-0.147286	-0.378501	0.0793055	-0.469124	-0.483549	0.460687	-0.270018	-0.388124	-0.481337	-0.481155	-0.335019	-0.366331	-0.459367	0.234389	-0.116876	-0.549469	0.207346
3-Hydroxyphenylpropionic acid	0.194742	-0.260389	-0.0670784	-0.163322	0.175061	-0.143373	-0.125979	0.24826	-0.273849	-0.107588	-0.0431131	-0.109153	0.09753	0.0709955	-0.132787	0.234632	0.234108	0.11771	0.179813	0.274573	0.236869	0.136842	0.0645499	-0.132079	-0.0365529	0.322915	0.105195	0.230613	0.140017	-0.300733	-0.298957	-0.487755	0.531434	0.200931	-0.0141219	0.25149	0.398212	-0.457867	0.113427	0.480956	0.185681	0.355796	0.135476	0.124119	0.442737	-0.165283	-0.101108	0.580692	-0.309289
Azelaic acid	-0.25703	0.0400462	0.0317076	0.0830757	0.00532922	0.121098	0.24431	-0.425108	0.121594	-0.198583	-0.0859667	0.0729248	-0.116629	-0.124933	0.242001	-0.292974	-0.448012	-0.218023	-0.266819	-0.00082291	-0.349975	-0.245422	-0.243076	0.321034	0.345378	-0.296493	-0.196881	-0.310706	-0.0998529	0.166573	0.224845	0.277152	-0.166591	-0.369115	0.169243	-0.264535	-0.419185	0.272763	-0.212801	-0.360687	-0.3772	-0.453406	-0.271752	-0.343642	-0.407512	-0.0142947	-0.017949	-0.475906	0.264456
5-Hydroxyindoleacetic acid	-0.0209415	-0.0859352	0.0460068	0.00549269	-0.0474163	-0.188914	0.0212935	0.108285	-0.387824	-0.122333	-0.0361503	-0.15502	0.175774	-0.289083	-0.148786	-0.0943419	0.310856	0.0341657	0.161131	-0.0312813	0.177902	0.201789	0.308357	-0.156315	-0.230575	-0.0561131	0.0592456	0.142513	-0.0152609	-0.118424	-0.227557	-0.341069	0.186844	0.185038	0.0226185	0.0683589	0.333875	-0.283103	-0.120206	0.26402	0.0517693	0.371742	-0.0515907	0.306301	0.287242	-0.32967	-0.0264515	0.474817	-0.0577687
Dehydroabietic acid	-0.0459752	-0.0853901	0.218987	0.152567	-0.189246	0.0811985	-0.155734	-0.0780656	0.00505539	-0.0795921	-0.0741327	0.0656934	0.370343	0.0432304	0.149868	0.0293256	0.0394464	-0.00875451	-0.114098	-0.185255	-0.26235	0.0893169	0.0127397	0.0425751	-0.261167	-0.324454	0.314751	-0.138191	0.336413	0.347774	-0.136215	-0.048146	-0.0195835	0.103302	-0.267988	-0.243333	0.0192808	0.112249	0.00784093	0.0174856	-0.133346	0.0613021	-0.216461	-0.154114	-0.0855852	0.340148	0.0183635	-0.0695735	-0.167308
Ethylene glycol	-0.0619627	0.0496929	-0.32668	-0.301601	-0.0400373	-0.100593	-0.126026	-0.219453	-0.139011	-0.130152	0.0586563	-0.156903	-0.0995772	-0.183741	-0.118495	0.00113248	-0.123115	0.295025	0.104356	0.233236	0.0690089	0.221906	0.0375261	0.235259	0.0608343	0.0513914	-0.147579	0.117357	-0.418937	-0.368897	-0.0956329	0.0424917	0.401907	-0.038972	0.424368	0.054192	0.122483	0.0380412	-0.335556	0.1068	-0.180358	0.123115	-0.0717436	0.146599	0.255336	-0.332193	0.269778	0.205167	0.0608299
Propylene glycol	-0.097079	0.117129	-0.181773	-0.123743	-0.120119	-0.207202	0.0779163	0.278573	-0.140667	0.135576	0.189258	0.0162314	0.168553	-0.248699	-0.313306	0.215276	0.316707	0.0888869	0.280907	0.186079	0.477087	0.116091	0.31047	-0.248245	-0.279468	0.238642	-0.134238	0.51974	-0.454135	-0.293859	0.10787	-0.0665983	0.107406	0.218924	0.279169	-0.0324216	0.390739	-0.1091	-0.203951	0.249175	0.336844	0.448981	0.0624699	0.438197	0.443616	-0.460519	0.148815	0.060416	0.371556
1,3 Propanediol	0.105284	-0.285604	0.0758583	-0.285512	-0.0863374	-0.229825	-0.210331	0.0101475	-0.0285602	0.0797222	-0.148752	-0.0262588	0.176106	0.333368	-0.362819	-0.0100228	-0.0050211	0.213813	0.0146081	-0.0325782	0.015776	0.215428	0.134835	0.112539	0.0165255	0.103271	-0.0151085	-0.113962	0.374472	-0.113781	-0.438425	-0.23889	0.0573822	-0.0647941	-0.119448	0.168078	0.00693259	-0.130901	0.314214	0.367078	0.0348088	-0.0492802	0.0542187	-0.0133983	0.0527552	0.154304	-0.0661355	0.212268	-0.36139
1,4-Butanediol	-0.192645	0.0099412	-0.0760074	0.377507	0.10878	0.352202	0.288635	-0.204917	0.0598158	-0.230189	-0.250768	-0.0379608	-0.12892	-0.153776	0.481492	-0.35383	-0.26936	-0.172277	-0.283245	0.0862197	-0.161105	-0.188113	-0.0539036	0.194512	0.0307695	-0.360234	-0.171787	-0.359745	-0.148912	0.250409	0.139492	0.445243	-0.0871503	-0.322101	0.059748	-0.376999	-0.308141	0.472044	-0.343986	-0.530301	-0.308454	-0.257828	-0.354977	-0.130349	-0.276811	0.00542546	0.0736262	-0.439809	0.284157
1-Hexadecanol	0.0456696	0.0913454	-0.0237781	-0.00693002	0.0556979	-0.0803932	0.074813	0.0990898	-0.0953006	0.234293	0.0708695	-0.126642	-0.177564	-0.204732	0.127785	-0.0397506	0.357655	-0.176303	-0.114298	-0.211642	0.170471	-0.238418	0.0768196	-0.0497072	0.297225	0.0813109	-0.223026	0.0516905	-0.499593	-0.130477	0.364703	-0.116578	-0.103964	0.115376	0.179423	-0.0467038	-0.0886208	-0.289027	-0.222014	-0.156074	0.0809638	0.0348808	0.0131318	0.366995	-0.119674	-0.271788	-0.158668	-0.129661	0.387748
Octadecan-1-ol	0.0488575	0.0735759	-0.00224805	-0.0559035	0.093096	-0.118599	0.0632114	0.0975122	-0.0844907	0.215206	0.0694335	-0.098292	-0.186426	-0.18811	0.0903377	-0.00258916	0.362464	-0.166281	-0.115233	-0.173085	0.172826	-0.230665	0.0512076	-0.0457346	0.311872	0.147648	-0.199026	0.0778303	-0.460426	-0.159801	0.337098	-0.17737	-0.0488057	0.116945	0.16736	-0.0112504	-0.0656798	-0.348482	-0.181344	-0.113778	0.101462	0.0414027	0.0137502	0.355641	-0.0942703	-0.290446	-0.163995	-0.0809739	0.353378
Nonane	0.118904	-0.0628316	0.255544	-0.243893	0.245163	-0.414805	-0.25292	0.161334	0.0676212	0.14986	0.171555	0.12338	0.0654652	0.114622	-0.298084	0.215867	0.0235591	-0.0849473	0.3117	0.114089	0.19423	-0.192509	0.118252	-0.0554015	-0.00994352	0.299765	0.0880316	0.142513	0.0201136	-0.24545	-0.179482	-0.396046	0.204714	0.102629	-0.0357478	0.369584	0.36072	-0.318234	0.387532	0.257554	0.34482	0.201957	0.191407	-0.141622	0.471556	-0.0930439	-0.296694	0.435776	-0.130899
l-Alanine	-0.0684067	-0.0172937	-0.320358	-0.0860816	-0.0213701	-0.135257	0.106161	0.135468	-0.181827	-0.0478389	-0.0253398	-0.193148	0.192229	-0.212952	-0.133855	-0.0853998	-0.0249002	-0.0921224	0.497678	-0.111974	0.176466	-0.0872513	0.25622	0.00268281	-0.0796437	-0.130445	-0.324241	0.102525	-0.527151	-0.226553	-0.122338	0.267279	0.0413152	-0.0383912	0.556292	-0.0623784	0.0394075	0.388403	-0.401405	0.182984	-0.124276	0.117389	-0.201766	0.203919	0.190311	-0.164994	0.0480164	-0.150571	0.46226
L-Valine	-0.0515756	-0.0610207	-0.302994	0.0164804	-0.0691701	0.148154	0.128973	0.111279	-0.110593	0.0161737	-0.137073	-0.176498	-0.180954	-0.31743	-0.0824032	-0.309449	0.0350795	0.0674774	-0.0791668	-0.0837767	-0.0277658	0.330073	0.128722	-0.174862	-0.128792	-0.238589	-0.30964	-0.0698343	-0.232787	0.0534582	-0.151344	0.283069	-0.236032	-0.0850545	0.327535	-0.115282	-0.173994	0.225125	-0.446142	-0.34911	-0.289802	-0.0338745	-0.390846	0.622941	-0.122597	-0.0777037	0.397786	-0.358742	0.488442
Valine	-0.157404	0.10535	-0.0373546	0.227623	0.134716	0.178466	0.17763	-0.160027	0.164181	-0.168655	-0.223059	0.0418409	-0.190791	-0.254594	0.268261	-0.358454	-0.225511	-0.171116	-0.166788	-0.00612959	-0.150755	-0.153661	-0.00982109	0.144183	-0.0425655	-0.345192	-0.135201	-0.332996	-0.176623	0.312	0.138925	0.421104	-0.187987	-0.252962	0.0545691	-0.333501	-0.276703	0.493548	-0.340095	-0.602469	-0.33991	-0.201974	-0.441653	0.0170166	-0.253023	0.0238439	0.0880972	-0.419089	0.381416
l-Leucine	-0.218583	0.0853939	-0.0316028	0.17391	0.23999	0.185902	0.100041	-0.3159	0.0596276	-0.274833	-0.202348	-0.0533383	-0.16938	-0.25148	0.283843	-0.366113	-0.339061	-0.205676	-0.188194	0.0326928	-0.105523	-0.109755	-0.129264	0.122204	0.0536449	-0.211529	-0.203488	-0.281641	-0.127768	0.152515	0.156582	0.345246	-0.132719	-0.312547	0.0254949	-0.199623	-0.272245	0.372411	-0.357198	-0.497156	-0.443659	-0.232938	-0.327075	-0.183195	-0.25208	-0.0811177	0.151392	-0.221358	0.182567
Leucine	-0.214501	0.179071	0.142683	-0.0460374	-0.0685324	-0.0925972	0.218228	-0.367861	0.159452	-0.15486	-0.0667028	0.328471	-0.0335625	-0.058267	0.00552214	-0.12818	-0.391009	-0.119519	-0.017902	-0.101163	-0.4302	-0.255852	-0.183876	0.387705	0.224444	-0.254928	0.0504684	-0.156394	-0.035663	0.346486	0.139152	0.151721	-0.0917292	-0.189628	0.184131	-0.23143	-0.212538	0.212482	-0.0175521	-0.165764	-0.283316	-0.250515	-0.320921	-0.340658	-0.246354	0.116611	-0.030503	-0.471106	0.245813
Isoleucine	-0.196864	0.0829458	-0.00498655	0.14913	0.207243	0.181552	0.172798	-0.277284	0.105923	-0.208521	-0.216666	0.0283909	-0.199277	-0.234226	0.293009	-0.385534	-0.270668	-0.28937	-0.214421	0.0555498	-0.159363	-0.2106	-0.162316	0.138499	0.133529	-0.259943	-0.210286	-0.365798	-0.135567	0.254159	0.228135	0.295459	-0.139041	-0.270737	0.0309954	-0.28198	-0.305853	0.314265	-0.332404	-0.490906	-0.370777	-0.258524	-0.355052	-0.101912	-0.318237	-0.0670554	-0.00546688	-0.345014	0.332777
beta-Alanine	-0.212955	-0.137616	0.0012937	-0.146043	0.0567442	0.0466666	-0.146542	-0.124753	-0.0381925	0.441134	0.114247	0.0658992	0.122313	0.448047	-0.0254861	0.330632	0.176253	0.298639	-0.140703	0.148727	0.405067	0.148442	0.284805	0.0371017	-0.101394	0.458051	-0.066016	0.228821	-0.00347344	-0.531776	-0.276427	-0.305412	0.188256	0.0672104	-0.0263612	0.264282	0.043152	-0.372705	0.412818	0.525048	0.433861	0.00813534	0.284709	0.0354804	0.0394351	-0.293503	0.105757	0.0836298	-0.248247
Serine	-0.176754	-0.0241167	-0.108496	0.135356	0.0906655	0.183869	0.229866	-0.286939	0.0994724	-0.24697	-0.20801	-0.0864288	-0.0928646	-0.162781	0.324337	-0.328861	-0.277301	-0.224359	-0.27722	0.167182	-0.0896203	-0.251484	-0.109457	0.303289	0.313355	-0.251957	-0.363161	-0.320035	-0.23065	0.0569841	0.27256	0.3223	-0.0880866	-0.370642	0.155094	-0.368995	-0.409244	0.361694	-0.436262	-0.369608	-0.378438	-0.367369	-0.230891	-0.174455	-0.366656	-0.12975	-0.0173634	-0.357943	0.287418
L-Threonine	0.00666236	-0.175107	-0.00995883	0.179429	0.0668976	-0.286247	0.0544546	-0.0321504	-0.143053	-0.033851	-0.103606	-0.142751	0.0517106	0.149796	-0.165502	0.0420553	0.102938	-0.122165	-0.0281102	-0.261715	0.173689	-0.074778	0.267416	0.100957	0.0945726	0.142336	-0.207397	0.114142	0.138327	0.0370053	-0.0964022	-0.149058	-0.350807	-0.0944964	-0.0699264	0.0956433	-0.20226	-0.0970687	0.0792646	0.082243	-0.317769	-0.252999	-0.0695733	-0.182801	-0.187389	0.23412	-0.123207	0.232453	-0.228637
Glycine	-0.117755	0.150656	0.283098	0.0915506	0.173133	-0.198284	0.00799597	0.062395	0.0170281	0.0784998	0.236526	0.0485885	-0.0712894	-0.388043	-0.0170508	0.0900271	0.217869	-0.278706	0.140784	-0.0320868	0.20795	-0.233178	0.0882121	-0.266877	-0.0193156	0.160957	-0.03299	0.282362	-0.30679	-0.216142	0.199837	-0.185355	-0.0419598	0.136271	0.193707	0.276817	0.205097	-0.259096	-0.0748978	-0.0480338	0.13456	0.209416	0.162828	0.0784103	0.214898	-0.36595	-0.088359	0.158919	0.21783
Homoserine	-0.0375245	-0.0318352	-0.3289	0.221765	0.198507	0.00918715	0.25586	0.132558	-0.0368081	-0.0145553	-0.200631	-0.225684	-0.116868	-0.232845	0.0981955	-0.286809	0.131748	-0.0474589	-0.0450779	0.0399011	0.291795	-0.107499	0.300711	0.0339822	-0.0643882	-0.203898	-0.42825	-0.140192	-0.454464	-0.0346322	-0.031357	0.387983	-0.145609	-0.124148	0.352697	-0.27365	-0.177142	0.433763	-0.492491	-0.456925	-0.195015	-0.0200816	-0.391828	0.461265	-0.0702898	-0.185309	0.139776	-0.279546	0.554091
Aspartate	-0.0997917	0.103812	-0.293821	0.219999	-0.00609817	0.306646	0.079475	-0.204289	-0.0647716	-0.248038	-0.219665	-0.162106	-0.139637	-0.307657	0.324591	-0.378475	-0.332564	0.0185343	-0.121727	0.0190652	-0.0939392	0.0400975	0.0183376	0.210343	0.04098	-0.39291	-0.245644	-0.199487	-0.317423	0.186498	0.184266	0.481288	-0.0870953	-0.241822	0.174844	-0.38484	-0.226038	0.50237	-0.574661	-0.5209	-0.540423	-0.102367	-0.38114	0.0205071	-0.167955	-0.03139	0.304256	-0.350469	0.266385
DL-Phenylalanine	0.0260887	-0.0486836	-0.0487042	0.0320764	-0.0181361	-0.122476	0.191167	0.0340375	0.209545	-0.101821	-0.258406	0.0637083	-0.14487	-0.149013	-0.0724036	-0.266536	-0.074665	-0.238167	-0.00595484	-0.168847	-0.275986	-0.208436	-0.00318205	0.18047	0.121867	-0.321233	-0.207496	-0.32741	-0.126261	0.399747	0.0132181	0.314006	-0.277065	-0.203634	0.254395	-0.265965	-0.343653	0.43398	-0.287521	-0.395963	-0.401607	-0.28301	-0.496378	0.162053	-0.267391	0.320792	-0.11039	-0.493659	0.503918
2-Aminoadipic acid	0.0438776	-0.0836227	-0.0042305	0.234003	-0.128775	-0.209471	0.391181	0.0664841	0.217334	-0.117396	-0.165229	0.0252353	-0.113042	0.0811571	-0.14985	-0.122743	0.0154185	0.0628781	-0.144913	-0.212478	-0.207768	-0.127392	0.0109184	0.176983	0.0225124	-0.182712	0.000382091	-0.21784	0.162474	0.262866	-0.164554	0.416752	-0.280069	-0.233756	0.157445	-0.128587	-0.313304	0.473023	0.0661165	-0.357363	-0.136161	-0.321028	-0.277641	0.0217693	-0.226436	0.381249	-0.0699295	-0.340046	0.132696
Phenylalanine	-0.152044	0.0208175	-0.0718638	0.153467	0.215226	0.122668	0.278033	-0.085457	0.0829355	-0.0928965	-0.250211	-0.0228003	-0.18042	-0.226415	0.219249	-0.394967	-0.0359531	-0.242596	-0.181032	0.0685001	-0.0154648	-0.204952	0.0136359	0.0798038	0.0545256	-0.258499	-0.305858	-0.361294	-0.260178	0.169587	0.0910818	0.311916	-0.128202	-0.212492	0.178748	-0.293333	-0.271002	0.335995	-0.374336	-0.469066	-0.206287	-0.169394	-0.390952	0.224845	-0.255206	-0.152421	0.000578793	-0.397073	0.528254
Tyrosine	-0.156125	0.120575	-0.076855	0.179972	0.129926	0.0811598	0.341008	-0.0826479	0.0592743	-0.0525413	-0.208308	0.0198243	-0.170287	-0.264501	0.169135	-0.413382	-0.00903089	-0.165583	-0.12312	0.0587929	0.0134186	-0.212275	0.0862819	0.123459	0.0532997	-0.314766	-0.303364	-0.2986	-0.340251	0.188656	0.122749	0.350087	-0.140361	-0.156744	0.267577	-0.329898	-0.204046	0.351871	-0.384797	-0.46942	-0.158389	-0.0794759	-0.363107	0.289415	-0.200801	-0.218021	0.0356891	-0.443407	0.5985
N-Acetyl-D-glucosamine (isomer 2)	-0.193879	0.0687416	0.0380425	0.211838	0.0101935	0.278261	0.238092	-0.275346	0.169622	-0.232496	-0.216355	0.182517	-0.131213	-0.0643018	0.36175	-0.239707	-0.324281	-0.2874	-0.229429	0.057034	-0.415124	-0.219509	-0.243706	0.212734	0.0185392	-0.346447	0.0283211	-0.40602	0.0200461	0.516848	0.214643	0.302946	-0.0997676	-0.250034	-0.0800953	-0.369182	-0.288764	0.365735	-0.170525	-0.391489	-0.30107	-0.315062	-0.360342	-0.287758	-0.330083	0.237867	-0.0981199	-0.452059	0.242464
Ethylbenzene	-0.18524	-0.169848	0.245459	-0.0411436	-0.185368	-0.121468	-0.199859	-0.296221	0.237827	0.146671	-0.218725	0.245498	0.0915103	0.433787	-0.111053	0.0834038	0.0443819	0.397152	-0.468377	0.0285312	0.136435	0.184224	0.245808	0.413171	-0.0508211	0.299452	0.120946	-0.0670456	0.454497	-0.0341654	-0.179207	-0.0990796	0.0735971	-0.215411	-0.473724	-0.149173	-0.180711	-0.0509405	0.465362	0.156745	0.0938129	-0.223234	-0.135663	-0.187067	-0.162719	0.084593	-0.0473768	-0.0472822	-0.444116
p-Xylene	-0.139833	0.169076	0.119554	0.265634	0.139669	0.052541	0.170453	0.0421931	-0.0446219	0.116265	0.243452	-0.0354231	-0.179647	-0.373675	0.213365	0.0728382	0.329159	-0.256037	0.00675925	-0.0413692	0.138615	-0.191719	0.0207441	-0.313429	-0.0381421	0.0471499	-0.0510011	0.208503	-0.37472	-0.159181	0.207865	-0.0502705	-0.0593351	0.202466	0.298595	0.221878	0.0831933	-0.209774	-0.193178	-0.133901	0.1081	0.146307	0.150978	0.240383	0.0334535	-0.328752	0.000259071	0.00639196	0.328908
Tributyl acetylcitrate	0.124865	0.109582	0.0141837	-0.10988	0.0188182	-0.202042	-0.00619544	0.119609	-0.03162	0.183066	0.0903314	-0.132217	-0.194375	-0.314151	-0.0376603	-0.0923887	0.321883	-0.17145	-0.0544708	-0.157635	0.123907	-0.199571	0.034727	-0.0831147	0.301323	-4.97791e-05	-0.214667	0.01154	-0.464919	-0.0943491	0.361339	-0.137917	-0.128948	0.138362	0.219495	0.0064021	-0.0230888	-0.262345	-0.27881	-0.214418	0.00837756	0.0970814	0.0628503	0.403684	-0.0389486	-0.251275	-0.163876	-0.0302134	0.370122
Myristic acid	0.0241045	0.152284	0.20068	-0.0567034	0.131536	-0.0971923	-0.416706	0.167935	-0.0790688	0.292781	0.285883	0.0363579	0.0590155	-0.138482	-0.157728	0.191818	0.374128	-0.0471782	0.217413	0.0285458	0.396036	0.175491	0.19478	-0.402124	-0.258286	0.320272	0.0308251	0.401404	-0.0524732	-0.19998	0.0109077	-0.359044	0.0225796	0.398272	-0.152354	0.318783	0.429523	-0.473175	0.0756227	0.209018	0.262706	0.44864	0.236329	0.291968	0.374955	-0.256566	0.096771	0.450571	-0.0151197
Pentadecanoic acid ester	-0.16493	0.321049	0.267787	-0.0407426	0.109167	-0.0262028	0.0284222	-0.30325	0.0551027	0.0511875	-0.100832	0.368682	-0.204352	-0.0177402	0.189213	-0.105982	-0.121007	-0.24121	-0.162638	-0.30684	-0.232208	-0.292514	-0.111132	0.293182	0.248477	0.0717147	0.116992	-0.0764281	-0.11184	0.440032	0.459838	-0.126731	-0.144771	-0.0590544	-0.312585	-0.263697	-0.152576	-0.232729	0.124588	-0.233409	-0.103004	-0.15498	-0.333203	-0.226733	-0.300644	0.020797	-0.169066	-0.301525	0.186567
Palmitic acid	0.0769383	-0.0282462	0.0918536	-0.321044	0.0917448	-0.158706	-0.112814	0.0101851	0.202727	0.11133	-0.24133	0.204116	-0.166162	0.0569926	-0.00687211	0.160834	-0.243164	-0.15676	-0.154578	-0.331292	-0.321654	-0.273019	-0.00706839	0.153415	0.0147319	-0.0482495	0.256571	-0.208015	-0.205906	0.396732	0.272186	-0.291642	-0.243747	-0.132525	-0.2191	-0.0689691	-0.183843	-0.0667911	0.144195	-0.305282	-0.1777	-0.17885	-0.193914	-0.239378	-0.213297	0.392413	-0.199715	-0.312116	-0.0892086
Linoleic acid	0.032633	0.0134858	0.0892794	-0.162813	0.0279607	-0.129586	0.0981925	-0.108054	0.206117	-0.0196809	-0.358374	0.33363	-0.157794	0.0792628	-0.017844	-0.00358685	-0.407494	-0.0816179	-0.0909716	-0.166587	-0.25303	-0.387396	-0.0280999	0.295604	0.19286	-0.140922	0.220882	-0.259364	0.0374063	0.463978	0.329315	-0.180573	-0.183135	-0.182193	-0.212185	-0.190911	-0.215366	0.0587278	0.237329	-0.201358	-0.246424	-0.18582	-0.132918	-0.418668	-0.283741	0.291016	-0.362485	-0.421912	-0.167286
9-Octadecenoic acid ester	0.208854	-0.1644	0.0622913	-0.238952	0.0122057	-0.185109	-0.0491951	0.128768	0.326987	0.068236	-0.267392	0.256858	-0.150694	0.162292	-0.135366	0.215787	-0.280744	-0.0338619	-0.0687415	-0.224677	-0.306099	-0.270905	0.0117305	0.17265	0.105277	-0.0891517	0.29525	-0.186656	0.142585	0.382663	0.122085	-0.268031	-0.25796	-0.125939	-0.207184	-0.0304888	-0.264307	0.0413395	0.307683	-0.182248	-0.217838	-0.265375	-0.0975498	-0.28633	-0.276352	0.539973	-0.315746	-0.329003	-0.250501
trans-13-Octadecenoic acid	-0.0400367	-0.0849272	0.103796	-0.301617	0.0896533	-0.121363	-0.0359416	-0.063072	0.261092	0.195108	-0.1287	0.315524	-0.178002	0.246651	-0.122782	0.311252	-0.26136	-0.0184366	-0.220724	-0.213329	-0.27733	-0.121934	-0.0329368	0.0532359	-0.0967862	0.102627	0.345441	-0.102492	0.107786	0.281027	0.0678869	-0.363189	-0.276935	-0.108587	-0.28378	0.116333	-0.216817	-0.165665	0.455635	-0.118509	-0.02816	-0.287481	-0.0573803	-0.302665	-0.293832	0.375315	-0.130834	-0.263774	-0.277215
Oleic acid	-0.00589536	-0.149414	0.020073	-0.0809329	-0.130628	-0.103596	-0.0666029	0.0836371	-0.407554	-0.10233	-0.0867978	-0.183176	0.296701	-0.173901	-0.128195	-0.171152	0.326604	0.0945123	0.0659501	-0.0272686	0.110764	0.326007	0.197545	-0.170045	-0.27549	-0.126941	0.111073	-0.0345715	0.152178	-0.0542532	-0.291615	-0.305579	0.266581	0.210426	-0.13724	-0.0713265	0.327736	-0.251413	-0.0916335	0.320227	0.12339	0.38755	-0.12114	0.361414	0.243227	-0.26812	-0.0480074	0.427598	-0.0816347
Stearic acid	0.179287	-0.0690664	0.0695454	-0.374564	0.111826	-0.203792	-0.290607	0.13855	0.212589	0.139913	-0.0888763	0.127256	-0.195057	-0.030152	-0.115685	0.30762	-0.121738	-0.105092	-0.106144	-0.312083	-0.269281	-0.0974754	-0.00164081	-0.0364785	-0.0771391	0.0394306	0.322061	-0.037433	-0.138246	0.277815	0.190478	-0.421033	-0.249029	0.00301508	-0.241393	0.100401	-0.0959965	-0.20241	0.129817	-0.289155	-0.180188	-0.102973	-0.123646	-0.0922863	-0.116347	0.409228	-0.0979149	-0.0732749	-0.174066
Arachidonic acid	0.0439953	0.0162584	0.257834	0.0106925	0.00109589	0.00612429	0.109345	-0.042767	0.439104	-0.0455321	-0.222557	0.285907	-0.264147	-0.223506	0.0865454	-0.201325	-0.250976	-0.137001	-0.207186	-0.0909992	-0.446546	-0.278268	-0.0284753	0.226055	0.173419	-0.44471	0.124718	-0.381312	0.0447371	0.439607	0.146833	0.0503334	-0.295034	-0.203485	0.0129218	-0.199086	-0.361941	0.260561	-0.0500311	-0.571234	-0.310203	-0.297394	-0.265097	-0.0296538	-0.393154	0.23567	-0.128192	-0.534075	0.201729
Eicosanoic acid	0.230139	-0.2306	-0.0213378	-0.24036	-0.0437179	-0.131992	-0.168209	0.183296	0.313887	0.0769353	-0.183185	0.104819	-0.093523	0.141948	-0.100692	0.250943	-0.186033	-0.00428596	-0.111109	-0.236125	-0.322425	-0.111542	0.0201002	0.109102	-0.0226707	-0.114285	0.267209	-0.184097	0.0796424	0.302354	0.0187263	-0.175848	-0.236031	-0.114126	-0.183435	-0.0464673	-0.263769	0.11976	0.168484	-0.230182	-0.214179	-0.2752	-0.16923	-0.149229	-0.221158	0.598793	-0.18457	-0.25513	-0.189401
1-Monopalmitin	0.0732756	-0.00923302	0.167728	-0.201284	0.00691286	-0.190568	-0.334472	0.185103	-0.102363	0.369158	0.215022	-0.0149179	0.0848689	-0.0185406	-0.261211	0.257455	0.473339	0.130001	0.0936199	0.0423864	0.376882	0.201748	0.231883	-0.320345	-0.152402	0.329052	0.0344721	0.340975	-0.0571176	-0.349997	-0.118561	-0.498835	0.121998	0.389116	0.00771706	0.394127	0.385137	-0.586446	0.154448	0.378239	0.350258	0.434743	0.373391	0.393091	0.339037	-0.285109	0.0495972	0.406505	-0.131727
9-Octadecenoic acid, -2-propyl ester	0.12814	-0.154647	-0.024517	-0.263294	0.0244033	-0.1623	-0.298106	0.157219	-0.274789	0.219866	0.0775229	-0.0845723	0.249931	0.235299	-0.292286	0.241488	0.29223	0.257268	0.159878	0.0843207	0.351208	0.29133	0.184777	-0.211843	-0.159926	0.299484	0.0943212	0.246657	0.207193	-0.316666	-0.320184	-0.519152	0.263341	0.33968	-0.135264	0.29684	0.390411	-0.517069	0.285045	0.596927	0.308058	0.399737	0.304418	0.194757	0.329925	-0.159102	0.00912119	0.517716	-0.393393
1-Monooleoylglycerol	0.0787368	-0.121306	0.016216	-0.186909	0.0711125	-0.219796	-0.201046	0.191625	-0.220549	0.247543	0.0842665	-0.0311314	0.173918	0.187255	-0.301472	0.345049	0.326799	0.188367	0.179536	0.05209	0.459639	0.158451	0.268258	-0.233464	-0.124668	0.439684	0.0463574	0.407364	0.0884289	-0.375642	-0.196571	-0.539913	0.16057	0.300805	-0.0620518	0.381928	0.346404	-0.547728	0.304332	0.587994	0.300666	0.359195	0.384269	0.13613	0.304024	-0.205343	-0.016921	0.462459	-0.37853
Stearic acid, 2,3-propyl ester	0.115754	0.129412	0.144525	-0.185769	-0.0103699	-0.165351	-0.259662	0.0340932	-0.0565506	0.273194	0.222615	-0.107472	-0.111859	-0.238883	-0.111075	0.0312511	0.333152	-0.0315468	-0.0167598	-0.0810998	0.168837	0.010805	0.0576856	-0.169479	0.194613	0.0941502	-0.106301	0.150356	-0.289176	-0.233156	0.215654	-0.349583	-0.058766	0.277062	0.132099	0.262479	0.144848	-0.488289	-0.125585	0.0235265	0.0700475	0.234993	0.336643	0.337944	0.0802435	-0.294002	-0.00861629	0.248015	0.0517545
Uracil	-0.0942978	0.0886397	0.125341	0.0570654	-0.0432977	0.0605641	0.229851	-0.293601	0.177579	-0.246709	-0.203731	0.172976	-0.160851	-0.168067	0.21234	-0.339311	-0.398442	-0.247186	-0.201375	-0.110991	-0.492342	-0.314073	-0.240614	0.393518	0.398755	-0.384865	-0.0686558	-0.372622	-0.0470144	0.424856	0.297375	0.231117	-0.178049	-0.324991	0.0656212	-0.373636	-0.393344	0.274164	-0.204365	-0.441457	-0.420989	-0.391183	-0.370226	-0.283605	-0.409674	0.153434	-0.129168	-0.523158	0.287828
Adenosine	0.137264	-0.0141264	-0.126602	-0.156405	-0.0694034	-0.0963521	-0.191869	0.246925	-0.415414	0.172846	0.197005	-0.212876	0.191281	-0.0637676	-0.279786	0.0663976	0.405425	0.262545	0.223893	0.0946288	0.274211	0.442652	0.154955	-0.369677	-0.293382	0.0762539	0.0145919	0.26826	-0.0567733	-0.258424	-0.348105	-0.287716	0.272647	0.442657	0.161036	0.254517	0.558532	-0.414527	-0.0543336	0.357648	0.304711	0.612227	0.189824	0.568558	0.527672	-0.274983	0.260971	0.479098	-0.0131991
m-Hydroxybenzoic acid	0.168536	-0.143268	0.288121	-0.264792	-0.00704349	-0.0873547	-0.257742	0.0494956	0.0861561	-0.0287767	-0.11315	0.0910434	0.148362	0.153785	-0.259304	-0.169845	-0.101331	0.152043	0.108555	0.0236322	-0.148875	0.194636	-0.0362705	0.0726855	0.124609	-0.0267089	0.0575469	-0.147673	0.491536	-0.0444776	-0.398001	-0.157273	0.115579	-0.0459488	-0.146196	0.137242	0.0578021	-0.0871817	0.248866	0.225794	0.0464037	0.0357772	0.0495958	0.0124917	0.0660842	0.0641516	0.0408913	0.136535	-0.249886
protocatechuic acid	0.0966722	0.225358	0.0286485	-0.145703	-0.00629089	-0.142151	-0.0653881	-0.00978411	-0.0545915	0.146967	0.1711	-0.104384	-0.186438	-0.329799	0.0144038	-0.0944595	0.179622	-0.159021	-0.0412133	-0.174646	0.0228373	-0.174743	-0.0623985	-0.0319974	0.341597	-0.0488173	-0.151821	0.0344769	-0.46832	-0.0546079	0.454702	-0.140467	-0.135857	0.1511	0.170376	-0.00711935	-0.00628812	-0.288421	-0.284187	-0.22711	-0.0437374	0.0913122	0.110677	0.254346	-0.0656724	-0.258215	-0.0872546	-0.0010611	0.299131
4-Hydroxyhydrocinnamic acid	0.327419	-0.155224	-0.128166	-0.156122	0.248926	-0.157621	-0.169855	0.304829	-0.24559	-0.0643348	-0.0260375	-0.118782	0.0235542	0.0838579	-0.164353	0.149363	0.153299	0.159931	0.296277	0.354289	0.207319	0.0946797	0.0383795	-0.116949	-0.0683691	0.172736	0.0741529	0.122622	0.0277263	-0.186613	-0.354917	-0.3517	0.548412	0.268857	0.129113	0.286519	0.534875	-0.323328	0.059069	0.291192	0.175763	0.499133	0.154023	0.192242	0.623456	-0.0723805	-0.0276246	0.572177	-0.208158
Benzenepropanoic acid, 4-hydroxy-3-methoxy	0.253667	0.0378934	-0.349444	0.166619	0.0641983	-0.0858422	0.085804	0.327331	-0.17582	-0.0708598	-0.134116	-0.236771	0.059914	-0.001276	-0.142295	-0.0165328	-0.0432033	0.175141	0.319897	-0.0525399	0.162162	0.0439031	0.292819	0.00486358	-0.22018	-0.182243	-0.185886	0.141959	-0.343065	0.108865	-0.209198	0.317717	-0.132455	0.0277636	0.39227	0.0112885	0.195608	0.408099	-0.307566	-0.232383	-0.224843	0.280102	-0.0568434	0.169542	0.341168	0.257615	0.393561	-0.00367203	0.0738018
Hydrocaffeic acid	0.205874	-0.172859	-0.109459	-0.221807	0.179395	-0.114845	-0.0506787	0.216673	-0.346454	-0.303191	-0.138776	-0.063807	0.141289	-0.119247	-0.115831	-0.00504416	-0.0563313	-0.0548053	0.333217	0.212076	-0.0531004	0.0663863	-0.0827082	-0.123583	-0.0682572	-0.0541926	0.174636	0.00523884	0.114241	0.0549482	-0.22351	-0.395744	0.476772	0.171803	-0.00782034	0.0362891	0.43621	-0.259253	-0.0580254	0.286131	-0.0140368	0.402612	-0.115451	0.0395008	0.43722	-0.0677109	-0.143788	0.428422	-0.114657
Coprostanol	-0.257792	-0.125083	0.0257638	0.274319	0.209175	0.413709	-0.0129774	-0.148601	-0.203586	0.274495	0.00286179	-0.00818821	0.0266152	0.476302	0.478813	0.233545	0.154018	0.0435814	-0.185458	-0.09875	0.206432	0.0448935	0.11235	-0.096187	-0.23876	0.379655	0.137405	0.0506463	0.157245	-0.236915	-0.236473	-0.14876	0.185554	0.0449552	-0.320658	0.223783	-0.0398804	-0.286095	0.464062	0.384051	0.352065	-0.0941285	0.124634	-0.196102	-0.118696	-0.0451811	-0.0275463	0.0845683	-0.345733
L-Threonic acid	-0.109854	-0.0751128	-0.0388405	0.129219	0.00500979	0.121824	0.192726	-0.313696	0.132684	-0.302243	-0.224021	-0.107243	-0.0639025	-0.0951663	0.272613	-0.399156	-0.321104	-0.20601	-0.251456	0.0196669	-0.232696	-0.241738	-0.140561	0.451249	0.491515	-0.285262	-0.400167	-0.365553	-0.0901624	0.0707422	0.175207	0.396946	-0.135196	-0.461472	0.169927	-0.376271	-0.542934	0.425516	-0.39898	-0.337141	-0.492194	-0.526779	-0.301935	-0.243588	-0.461998	0.0223958	-0.0383293	-0.382813	0.250215
Ribonic acid	-0.0937882	0.0485018	0.0205238	0.158978	-0.204298	0.00812562	0.0326955	-0.202139	0.00475334	-0.232219	-0.112129	-0.208241	0.022142	-0.301769	0.0325302	-0.411809	-0.191176	0.188655	-0.119302	-0.0673653	-0.0370248	0.133372	0.194979	0.347356	0.192156	-0.272996	-0.361496	-0.0381317	-0.238644	-0.152686	-0.0368302	0.472426	-0.124106	-0.368426	0.335689	-0.188687	-0.210017	0.444324	-0.479031	-0.35028	-0.40672	-0.131695	-0.17796	0.0491161	-0.0496706	-0.178648	0.421392	-0.181405	0.142814
L-Threitol	0.0806051	-0.0118118	-0.241165	-0.0230576	-0.236971	0.00264798	0.01348	0.263036	-0.28035	-0.0541563	-0.0607786	-0.333258	0.25073	-0.167424	-0.134038	-0.324893	0.00947734	0.00553656	0.23417	-0.134744	-0.0437874	0.242984	0.153225	-0.110929	-0.285436	-0.335949	-0.29326	-0.101331	-0.431534	0.0802422	-0.200332	0.446262	-0.0640516	-0.0745097	0.345956	-0.190902	0.220281	0.418496	-0.488249	-0.165564	-0.0148869	0.267149	-0.242348	0.393383	0.395978	0.0671034	0.331485	-0.12626	0.460362
Pinitol	-0.23209	0.12391	-0.149589	0.0347122	-0.340928	0.050334	0.0556341	-0.129444	-0.193705	-0.100466	0.108193	-0.233344	0.198599	-0.179474	-0.19167	-0.145674	-0.104345	0.235936	0.159262	-0.0137671	0.0228257	0.415778	0.1255	-0.0969543	-0.38365	-0.140395	-0.195374	0.161018	-0.307883	-0.214173	-0.235699	0.465564	-0.0549417	-0.118841	0.45081	0.133529	0.179377	0.396626	-0.341583	0.0707302	-0.0653366	0.182544	0.119057	0.103584	0.303497	-0.148872	0.593381	0.0138222	0.0722234
1,5-Anhydro-D-sorbitol	-0.134682	-0.000235207	-0.074289	0.182131	0.171677	0.0507501	0.349982	-0.0652627	0.0448013	-0.0632444	-0.218918	-0.0475607	-0.19647	-0.243645	0.163864	-0.430265	0.0619399	-0.279827	-0.184109	0.0286843	0.0110387	-0.242647	0.00986091	0.0760245	0.18762	-0.243719	-0.400769	-0.339297	-0.25594	0.143148	0.109363	0.301289	-0.16825	-0.185758	0.266167	-0.292325	-0.312988	0.262328	-0.387993	-0.431229	-0.210567	-0.203479	-0.395274	0.312344	-0.297663	-0.182989	-0.0803535	-0.422515	0.629085
Ribitol	-0.00227521	0.0452548	-0.127008	-0.00654254	-0.194297	0.023439	0.172663	-0.288828	0.236447	-0.239379	-0.2349	0.0328475	-0.152093	-0.110212	0.144781	-0.31537	-0.480851	-0.0695969	-0.223649	0.0110426	-0.29909	-0.317989	-0.179907	0.508773	0.486499	-0.386303	-0.181767	-0.398411	-0.143262	0.282262	0.458374	0.368941	-0.171311	-0.395778	0.0750591	-0.485347	-0.464947	0.47785	-0.285918	-0.433062	-0.4742	-0.429594	-0.208291	-0.346242	-0.410504	0.145776	-0.219387	-0.511658	0.14943
Myoinositol-1	-0.128169	0.0171611	-0.248231	0.183236	-0.120325	0.0286252	0.397342	0.0784866	0.119322	-0.337838	-0.170744	0.113656	-0.18661	-0.30614	0.0874011	0.0937267	-0.200191	-0.00462425	-0.043804	-0.0972375	0.122928	-0.168831	0.137329	0.281415	0.368721	0.250031	-0.178193	0.470805	-0.207845	-0.0706717	0.538126	0.28392	-0.186922	-0.412604	0.0349931	-0.457836	-0.469192	0.285781	-0.274661	-0.185726	-0.36261	-0.409909	-0.382832	-0.150865	-0.369125	-0.144944	0.0280062	-0.504628	0.226337
Myoinositol-2	-0.220256	0.103638	-0.265374	0.0220905	-0.32101	0.0446495	0.0605563	-0.174952	-0.222306	-0.194261	0.0911097	-0.248216	0.263886	-0.0962289	-0.20875	-0.163875	-0.129758	0.341665	0.22543	0.0753527	0.0415207	0.490034	0.191687	0.0646234	-0.397862	-0.183523	-0.198888	0.146098	-0.209631	-0.233806	-0.3922	0.500401	0.0502734	-0.124508	0.420234	0.0185873	0.154913	0.49863	-0.35137	0.158782	-0.104888	0.135071	-0.00658231	0.104223	0.278044	-0.152773	0.627261	0.131463	0.0398727
Myoinositol-3	0.0934446	0.194237	0.0199402	-0.148103	-0.0203902	-0.116073	-0.0521335	0.0133049	-0.09519	0.135261	0.147448	-0.14005	-0.176526	-0.341429	0.00860349	-0.11307	0.196593	-0.144178	-0.0583863	-0.176051	0.0275717	-0.119897	-0.05633	-0.0691795	0.325845	-0.0373172	-0.176745	0.046543	-0.468876	-0.0830373	0.420661	-0.141171	-0.132048	0.134913	0.18921	0.0132507	0.00107912	-0.306258	-0.310891	-0.209077	-0.0422839	0.107377	0.121009	0.29807	-0.0525476	-0.279288	-0.0343153	0.000296442	0.290949
Maltitol	0.239307	0.0368936	-0.229773	0.0776748	0.154796	-0.145896	-0.0633159	0.389259	-0.281962	0.144302	0.019786	-0.224851	0.0271927	-0.0736248	-0.19602	0.029874	0.241261	0.31379	0.319255	0.0294345	0.442646	0.16856	0.415083	-0.190156	-0.26821	0.0336994	-0.100983	0.285552	-0.299437	-0.220836	-0.312013	-0.00673257	0.107528	0.258886	0.302058	0.208851	0.444884	-0.0220372	-0.114867	-0.0355737	0.133997	0.554779	0.0809832	0.475466	0.543919	-0.168148	0.32744	0.281117	0.0318067
Glycerol	-0.0904388	0.0948772	0.0971299	0.134194	-0.0475309	0.166203	0.167097	-0.303709	0.265611	-0.177139	-0.253512	0.202862	-0.208169	-0.112099	0.314715	-0.267343	-0.410365	-0.209827	-0.276204	-0.0505667	-0.435791	-0.342897	-0.229894	0.33797	0.252073	-0.407661	0.0451309	-0.450912	-0.015675	0.509154	0.379929	0.246812	-0.181824	-0.278211	-0.065893	-0.370985	-0.379159	0.346936	-0.138902	-0.500865	-0.408308	-0.347669	-0.26694	-0.357109	-0.420317	0.250827	-0.201506	-0.549442	0.140358
Xylulose	0.137664	-0.138053	-0.228704	0.0730326	-0.171549	-0.17607	0.022073	0.334004	-0.345062	-0.0265466	-0.13631	-0.355198	0.210387	-0.284637	-0.171144	-0.0335982	0.443026	0.170829	0.130942	-0.134436	0.505577	0.167683	0.507995	-0.0842361	0.0180542	0.052855	-0.299534	0.366996	-0.286722	-0.30595	0.0190542	-0.0995664	-0.0351146	0.112827	0.207278	-0.117869	0.0948592	-0.075812	-0.423726	0.188506	-0.129887	0.312412	0.0115716	0.500794	0.13619	-0.301578	0.12512	0.173438	0.0462322
Arabinose-1	0.0172892	0.00410743	0.275212	0.0473906	-0.019863	-0.136038	0.18072	-0.15978	0.321771	-0.24202	-0.220859	0.19282	-0.14024	-0.102165	-0.0577522	-0.378589	-0.361291	-0.176529	-0.0607045	-0.112198	-0.396476	-0.299838	-0.199708	0.281642	0.344524	-0.324263	-0.0130424	-0.420487	0.282902	0.34006	0.0676393	0.25431	-0.221881	-0.333919	-0.0014262	-0.15621	-0.344101	0.369789	0.0489954	-0.360576	-0.315536	-0.367207	-0.221363	-0.290261	-0.314164	0.220283	-0.264047	-0.352345	0.0924562
Arabinose-2	-0.0925528	0.0113363	-0.0879715	0.104948	-0.190217	0.100653	0.278145	-0.317016	0.227253	-0.295575	-0.244309	0.0473909	-0.103802	-0.0667561	0.210746	-0.333902	-0.455838	-0.0895798	-0.25002	0.0319212	-0.355904	-0.284748	-0.216371	0.480154	0.383426	-0.399428	-0.154714	-0.432062	-0.0484624	0.295817	0.319052	0.468377	-0.125871	-0.431308	0.0971397	-0.481308	-0.474855	0.558022	-0.257127	-0.397837	-0.421356	-0.465344	-0.268602	-0.362314	-0.417913	0.167399	-0.170976	-0.54824	0.180906
Ribose	-0.0745963	0.0659379	-0.0420784	0.0638863	-0.0858478	0.108085	0.217806	-0.325426	0.147311	-0.254989	-0.200329	0.0771507	-0.126433	-0.0872869	0.26213	-0.292678	-0.449186	-0.188429	-0.22328	-0.0834552	-0.448564	-0.307186	-0.249674	0.456266	0.419411	-0.397618	-0.118313	-0.379547	-0.110671	0.384099	0.344395	0.313032	-0.168118	-0.344586	0.0847685	-0.440682	-0.445453	0.370183	-0.267642	-0.424547	-0.477109	-0.438188	-0.335854	-0.354976	-0.442241	0.20871	-0.11399	-0.529199	0.229548
Ribofuranose (isomer 2)	-0.0592151	-0.0535315	-0.10026	-0.022253	-0.28991	0.0340241	0.182797	-0.279368	0.232215	-0.308292	-0.223803	0.00073176	-0.00179742	-0.0984	0.0858982	-0.347591	-0.462981	-0.00437462	-0.199641	0.0904217	-0.325302	-0.188937	-0.197381	0.490918	0.41119	-0.400952	-0.205869	-0.403564	-0.0430099	0.16244	0.252082	0.470647	-0.0428006	-0.448136	0.164544	-0.48842	-0.424687	0.581737	-0.31146	-0.297666	-0.399497	-0.409862	-0.245387	-0.29604	-0.31367	0.101589	-0.136313	-0.51559	0.184908
Arabinose-3	-0.0993203	-0.0393215	-0.0982922	0.18727	-0.112059	0.164421	0.334041	-0.234624	0.317819	-0.288754	-0.25277	0.116649	-0.146105	0.0461475	0.233635	-0.165405	-0.376713	-0.100358	-0.281442	0.0770723	-0.363971	-0.251052	-0.215448	0.370478	0.170533	-0.316198	-0.00658374	-0.402569	0.109811	0.376707	0.211222	0.437577	-0.158015	-0.390616	-0.0268816	-0.410663	-0.495415	0.579956	-0.114512	-0.383718	-0.349055	-0.520636	-0.268446	-0.374029	-0.469966	0.326356	-0.165789	-0.504076	0.0804245
Fructofuranose (isomer 1)	-0.131685	-0.0199215	0.23713	0.0591771	-0.0696171	0.0103567	0.299213	-0.23396	0.307083	-0.267608	-0.153917	0.161013	-0.108744	-0.188759	0.102147	-0.3509	-0.360237	-0.126905	-0.218397	-0.0450521	-0.463938	-0.228626	-0.162356	0.368352	0.363781	-0.370619	-0.0804709	-0.344717	0.0935674	0.171564	0.0461318	0.299311	-0.170579	-0.43153	0.165557	-0.25966	-0.45433	0.38157	-0.124868	-0.401658	-0.284128	-0.472267	-0.304795	-0.19976	-0.412084	0.0226771	-0.0335073	-0.50834	0.260055
Glucopyranose-1	-0.0494486	0.0505696	0.0118812	0.00146146	-0.104443	-0.000262482	0.274259	-0.253643	0.334619	-0.237423	-0.195746	0.172149	-0.186777	-0.116738	0.113261	-0.241738	-0.494825	-0.080524	-0.212887	-0.0662332	-0.474024	-0.317289	-0.18374	0.451502	0.343649	-0.435246	0.00821771	-0.391984	-0.0279859	0.35689	0.268199	0.312134	-0.239594	-0.389107	0.0891297	-0.378868	-0.48587	0.480967	-0.130341	-0.506294	-0.402395	-0.486038	-0.296783	-0.333883	-0.468604	0.215161	-0.133227	-0.573115	0.169902
Glucose	0.143187	0.162584	0.0566581	-0.200748	0.17594	-0.0330872	-0.313918	0.0896069	-0.162361	0.356927	0.371686	0.0485212	0.116433	0.251415	-0.238582	0.326839	0.161961	0.0100616	0.389466	0.046104	0.203397	0.115878	-0.132509	-0.446592	-0.117581	0.254734	0.133629	0.299976	0.185073	-0.157698	-0.139408	-0.44181	0.0281058	0.55419	-0.0178019	0.580237	0.435149	-0.554854	0.368331	0.535991	0.310467	0.409772	0.6218	0.00995423	0.26335	-0.0117779	0.0609723	0.460743	-0.304422
Talofuranose (isomer 1)	-0.145013	0.167928	-0.111416	0.0265172	0.022711	0.259297	0.0840635	-0.377216	-0.00942811	-0.200515	-0.0794563	-0.0556425	-0.126337	-0.166294	0.391755	-0.286522	-0.371147	-0.0870069	-0.256918	0.0176654	-0.219143	-0.130625	-0.184306	0.3556	0.330498	-0.253499	-0.170005	-0.225406	-0.289459	0.100107	0.388254	0.241896	-0.0390869	-0.269043	0.014766	-0.380237	-0.305764	0.19636	-0.370843	-0.381334	-0.334034	-0.271885	-0.202236	-0.231506	-0.334917	-0.15227	0.119429	-0.285459	0.171249
Glucose-1	-0.0769761	0.342417	-0.293452	-0.0688074	-0.22216	-0.0235617	-0.111619	0.0370401	-0.263217	0.103557	0.415392	0.00279772	0.0963885	-0.196721	-0.241908	0.151405	0.0651746	0.494976	0.312398	0.129265	0.182547	0.507139	0.140314	-0.19067	-0.509106	-0.0153573	0.213503	0.463663	-0.246671	-0.164107	-0.169258	0.132311	0.266964	0.379776	0.210894	0.0258899	0.584181	-0.00193656	-0.0811653	0.0839858	0.287991	0.584771	-0.0359136	0.390554	0.592695	-0.320811	0.523904	0.230894	0.158762
Glucose-2	-0.16298	0.126244	0.00709866	0.105527	-0.0584446	0.0733253	0.30081	-0.356535	0.180058	-0.282986	-0.158363	0.139355	-0.174584	-0.152248	0.205352	-0.321847	-0.471564	-0.212328	-0.178759	-0.0988365	-0.467988	-0.299134	-0.288798	0.361578	0.299281	-0.390925	-0.0490835	-0.380212	-0.056009	0.405892	0.299223	0.386913	-0.196124	-0.350096	0.0937191	-0.369801	-0.411421	0.43406	-0.196086	-0.466224	-0.424703	-0.430835	-0.36713	-0.36258	-0.414396	0.168117	-0.115163	-0.527977	0.272602
Glucopyranose-2	-0.0238238	0.0592161	-0.129711	0.0119682	-0.168645	0.0724586	0.171742	-0.312859	0.22012	-0.242747	-0.233368	0.0297969	-0.161364	-0.112434	0.193803	-0.324052	-0.48169	-0.0758516	-0.24635	0.0352382	-0.289201	-0.307616	-0.196749	0.492976	0.470681	-0.380101	-0.176619	-0.40544	-0.14264	0.278877	0.470903	0.366543	-0.150979	-0.388089	0.0482887	-0.488294	-0.456903	0.460468	-0.292642	-0.438136	-0.463565	-0.419303	-0.200398	-0.350923	-0.417501	0.113962	-0.202556	-0.498115	0.140899
Glucopyranose	-0.164706	0.114076	0.0245767	0.114336	-0.0685426	0.0605945	0.31218	-0.339842	0.193808	-0.285484	-0.158676	0.153062	-0.167161	-0.141478	0.179158	-0.313253	-0.457381	-0.213746	-0.162616	-0.112752	-0.487053	-0.286648	-0.287206	0.345481	0.269232	-0.389321	-0.0322565	-0.378424	-0.0194771	0.420066	0.254119	0.398235	-0.205009	-0.349314	0.100569	-0.349325	-0.410395	0.451137	-0.171538	-0.451266	-0.416136	-0.437258	-0.37914	-0.354061	-0.409061	0.202297	-0.113667	-0.531786	0.27475
Trehalose	-0.109151	0.0720246	-0.0609029	0.166651	-0.258101	-0.121708	0.336231	-0.076049	0.137975	-0.167356	-0.1879	0.173599	-0.188832	-0.225632	0.00665594	-0.0844595	-0.235224	-0.0488482	-0.0526139	-0.196508	-0.0763136	-0.302122	0.128102	0.405481	0.403232	-0.0186783	-0.188269	0.150882	-0.270348	0.164738	0.460059	0.295563	-0.233706	-0.360243	0.202503	-0.369695	-0.37505	0.29148	-0.187852	-0.252123	-0.3808	-0.335534	-0.325224	-0.188243	-0.260616	0.0397768	-0.143527	-0.595254	0.295261
Cellobiose (isomer 1)	-0.115467	0.136067	0.154075	0.019671	-0.019335	-0.219151	0.0651067	-0.0635372	-0.0590975	0.0895533	0.232027	0.269199	-0.00466321	-0.0793418	-0.192241	0.140759	0.122711	-0.0970246	0.20796	-0.224582	0.0505197	-0.0577417	0.107476	-0.00891322	0.153588	0.170535	0.105879	0.369651	0.223279	0.0197669	0.0742335	-0.32165	-0.15698	0.202729	-0.109875	0.0410572	-0.033252	-0.380528	0.277051	0.285518	0.0147477	-0.0795299	-0.115155	-0.0142779	-0.177867	-0.13219	-0.196818	0.0774379	0.0827588
Cellobiose (isomer 2)	-0.161826	0.0943614	0.162695	0.100212	0.024443	-0.18652	0.139301	-0.00346244	-0.0869549	0.114572	0.246804	0.24327	-0.00833915	-0.10587	-0.137716	0.195537	0.21368	-0.107883	0.155769	-0.211132	0.160465	-0.0746007	0.139421	-0.100255	0.142239	0.279767	0.0724396	0.4705	0.182382	-0.102623	0.0862928	-0.331923	-0.140659	0.196594	-0.0736342	0.0823783	-0.0299192	-0.441513	0.278097	0.299594	0.0991776	-0.0597306	-0.0820087	0.0376577	-0.161495	-0.239883	-0.171849	0.0468919	0.11218
Filter	exclude	exclude	exclude	exclude	exclude	exclude	exclude	exclude	exclude	exclude	exclude	exclude	exclude	exclude	exclude	exclude	exclude	exclude	exclude	exclude	include	include	include	include	include	include	include	include	include	include	include	include	include	include	include	include	include	include	include	include	include	include	include	include	include	include	include	include	include
[truncated: 26 more columns]

## Sheet: CorrelationMatrix2
## Microbiome-metabolome Spearman correlation matrix: the microbiome is classified at the phylum/class level and metabolites are listed
## A filter is set at a threshold of Spearman correlation of ± 0.5
## Some correlation coefficients listed in the manuscript are highlighted
	Bacteroidetes_c_unclassified	Melainabacteria	Cyanobacteria	Proteobacteria_c_unclassified	Actinobacteria_class12	Coriobacteriia	Actinobacteria	Epsilonproteobacteria	Deltaproteobacteria	Spirochaetae	Spirochaetes	Betaproteobacteria	Proteobacteria	Deferribacteres	Deferribacteres_class	Firmicutes_c_unclassified	Gammaproteobacteria	Verrucomicrobiaceae_c_unclassified	Negativicutes	Fibrobacteres	Fibrobacteria	Verrucomicrobiae	Lentisphaerae_RFP12_gut_group	Verrucomicrobia	Bacilli	Cyanobacteria_c_unclassified	Methanobacteria	Planctomycetes	Planctomycetacia	Firmicutes	Fusobacteria	Fusobacteriia	Saccharibacteria	Saccharibacteria_Unknown_Class	Thermoplasmata	Lentisphaerae_c_unclassified	Erysipelotrichia	Actinobacteria_class	Elusimicrobia	Elusimicrobia_class	Lentisphaerae	Tenericutes	Mollicutes	Euryarchaeota	Bacteroidetes	Bacteria_unclassified_phylum	Bacteria_unclassified_phylum_c_unclassified	Clostridia	Bacteroidia
Butyric acid	-0.025559	0.0186927	0.00506412	-0.00966167	-0.281673	-0.23804	-0.257617	-0.2209	-0.262995	0.0353828	0.0353828	-0.202715	-0.420159	-0.0933898	-0.0933898	0.205422	-0.362579	0.109748	0.117377	0.359697	0.359697	-0.257364	-0.0394764	-0.239153	-0.0311276	-0.104355	0.251476	-0.19917	-0.19917	0.147271	0.266367	0.266367	0.0992476	0.0992476	0.284392	-0.241162	-0.0428069	-0.27929	0.156762	0.156762	-0.140595	0.0712726	0.0712726	0.3762	-0.144987	0.151613	0.151613	0.195051	-0.153027
Isovaleric acid	-0.0711738	0.0899172	0.0899621	0.126259	-0.0403468	0.173509	0.14746	-0.190641	0.277901	0.160256	0.160256	-0.337515	-0.117593	0.0531678	0.0531678	0.0867066	-0.1322	0.108731	-0.134109	0.103556	0.103556	0.45563	0.398165	0.463297	-0.345165	0.0203828	0.3754	-0.11213	-0.11213	0.0381146	-0.255694	-0.255694	-0.312295	-0.312295	-0.0707591	0.248675	0.110543	-0.327322	0.533235	0.533235	0.390141	0.419255	0.419255	0.300254	-0.424647	0.499899	0.499899	0.298601	-0.449006
Propionic acid	-0.1274	-0.00867692	-0.0389787	0.0705907	0.0302249	-0.1748	-0.163385	-0.113849	-0.130694	0.0428204	0.0428204	-0.00909928	-0.18664	-0.189051	-0.189051	-0.0663672	-0.189011	0.195622	-0.111636	0.344888	0.344888	-0.246873	-0.250487	-0.217507	-0.17161	-0.243213	0.307282	0.0365509	0.0365509	-0.0212487	0.165384	0.165384	-0.158832	-0.158832	0.0756495	-0.245246	0.13928	-0.130534	-0.220392	-0.220392	-0.287241	0.114569	0.114569	0.316247	-0.0815868	0.128743	0.128743	0.0503714	-0.0612177
Valeric acid	-0.00730367	0.258896	0.241925	0.312849	-0.0777937	-0.00222058	-0.0147885	0.00179991	0.240415	0.263342	0.263342	-0.292051	0.0473257	0.138695	0.138695	-0.0174106	-0.0595688	0.0259293	-0.215751	0.358429	0.358429	0.16381	0.0565972	0.164833	-0.461881	-0.0774713	0.379588	-0.122979	-0.122979	-0.0531469	-0.133277	-0.133277	-0.310405	-0.310405	0.152491	0.0897586	-0.00411631	-0.166662	0.275356	0.275356	0.0810688	0.318498	0.318498	0.421813	-0.29518	0.42355	0.42355	0.419091	-0.321401
Lactic acid	-0.383345	-0.306626	-0.254037	0.0848923	-0.0858036	0.21177	0.194821	-0.0840763	0.051077	0.0789011	0.0789011	-0.193405	-0.186374	0.272231	0.272231	0.305005	-0.218241	0.242545	0.14632	-0.135106	-0.135106	0.264218	-0.210792	0.292301	0.506637	0.350454	0.148786	-0.204418	-0.204418	0.609379	-0.000196489	-0.000196489	0.0809159	0.0809159	0.00108652	-0.147888	0.298942	0.217173	0.0972399	0.0972399	-0.214187	0.147693	0.147693	0.134373	-0.405059	0.0646326	0.0646326	0.331908	-0.358812
Caproic acid	-0.0716337	0.141058	0.125061	0.124822	-0.00503863	0.148871	0.150063	0.135674	0.227593	0.0610234	0.0610234	-0.125975	0.142213	0.133494	0.133494	0.102297	0.0545638	0.135261	-0.0738329	0.328528	0.328528	-0.129179	0.0442157	-0.10948	0.0192192	-0.0959658	0.0403436	-0.130736	-0.130736	0.0578475	-0.157356	-0.157356	-0.190632	-0.190632	0.225432	0.0386962	0.0443509	0.406726	-0.102503	-0.102503	0.0485408	-0.065522	-0.065522	0.155225	-0.0125549	0.00590003	0.00590003	0.099459	0.00203944
Glycolic acid	-0.112859	-0.00698975	0.039238	-0.32956	0.072331	0.168438	0.165083	-0.201922	0.068366	-0.143883	-0.143883	0.0745069	-0.219855	-0.00512662	-0.00512662	0.0206024	-0.112188	-0.140035	0.163553	0.00170878	0.00170878	0.527835	0.334845	0.501687	0.168211	0.366535	-0.338857	0.171323	0.171323	0.0800497	-0.148751	-0.148751	-0.163041	-0.163041	-0.100419	0.358188	0.0860483	0.0444267	0.10721	0.10721	0.398262	0.107653	0.107653	-0.35771	-0.0507389	-0.115473	-0.115473	-0.204701	-0.0306643
alpha-Hydroxybutyric acid	-0.139352	-0.307081	-0.27842	-0.488593	0.172435	0.0559845	0.0703803	-0.0625974	-0.19193	-0.435562	-0.435562	-0.0506287	-0.241478	-0.116988	-0.116988	0.232278	-0.0665038	0.0118076	0.194487	-0.0459821	-0.0459821	-0.00972388	0.250476	-0.00802695	0.558689	0.15983	-0.266375	0.0923136	0.0923136	0.335128	-0.2762	-0.2762	-0.000352764	-0.000352764	-0.102415	0.254975	0.340157	0.0402941	-0.220179	-0.220179	0.291813	-0.096245	-0.096245	-0.293582	0.0524122	-0.423237	-0.423237	-0.311705	0.0880472
beta-Lactic acid	-0.00744154	-0.240013	-0.212982	0.198346	-0.107079	-0.124372	-0.129471	-0.273051	-0.315385	-0.178211	-0.178211	0.38264	-0.0776184	-0.220324	-0.220324	-0.159994	-0.0478075	-0.0957924	0.0384569	0.11273	0.11273	-0.257933	-0.22851	-0.266782	0.258188	0.161785	-0.17432	0.0919096	0.0919096	-0.211805	0.454287	0.454287	0.0110651	0.0110651	-0.0761513	-0.241681	-0.221181	-0.107669	-0.103894	-0.103894	-0.27049	-0.341023	-0.341023	-0.196942	0.361078	-0.214486	-0.214486	-0.358133	0.39676
2-Hydroxyvaleric acid	-0.16204	-0.0953793	-0.119026	-0.244397	0.102713	-0.194998	-0.17547	-0.023332	-0.257198	-0.340176	-0.340176	0.0361547	-0.0346258	-0.106046	-0.106046	0.126964	0.098715	-0.139549	0.168752	-0.201546	-0.201546	-0.297605	0.0128551	-0.311638	0.11264	-0.20953	0.220773	-0.148218	-0.148218	0.21442	-0.256317	-0.256317	-0.168985	-0.168985	-0.164766	0.125536	0.221403	-0.147724	-0.157712	-0.157712	0.0679094	0.0700144	0.0700144	0.111601	-0.0577103	-0.164056	-0.164056	-0.0744434	-0.0274603
2-Aminobutyric acid	0.134165	-0.296587	-0.286159	-0.255515	0.349255	0.260292	0.283447	-0.00147816	0.0186885	-0.32554	-0.32554	0.261935	0.0941844	-0.222093	-0.222093	-0.0135756	0.169027	-0.200597	-0.0351523	-0.144016	-0.144016	-0.115798	0.322251	-0.140524	0.500781	0.0169754	-0.428556	0.206728	0.206728	0.0407593	-0.198344	-0.198344	-0.054753	-0.054753	-0.203477	0.243384	0.155693	0.226869	-0.287491	-0.287491	0.335584	-0.320429	-0.320429	-0.492751	0.300029	-0.46343	-0.46343	-0.383849	0.298764
gamma-Hydroxybutyric acid	-0.00359305	0.11129	0.0925082	-0.0556993	-0.260961	-0.290248	-0.305439	-0.194452	-0.243662	0.0503521	0.0503521	-0.256857	-0.428197	-0.140572	-0.140572	0.178891	-0.363755	0.243161	-0.0175797	0.349778	0.349778	-0.177593	0.0735447	-0.142978	-0.154678	-0.124764	0.312721	-0.205403	-0.205403	0.117607	0.178658	0.178658	-0.0247807	-0.0247807	0.245127	-0.13058	0.0907573	-0.32438	0.128433	0.128433	-0.0110257	0.194956	0.194956	0.410559	-0.235265	0.275888	0.275888	0.214843	-0.256654
2-Hydroxyisocaproic acid	-0.205996	-0.290988	-0.299617	-0.40535	0.153532	-0.0251136	-0.00686908	0.00607182	-0.232741	-0.519822	-0.519822	0.0140968	-0.122491	-0.15234	-0.15234	0.159347	0.0292471	0.0434612	0.182723	-0.275168	-0.275168	-0.347539	0.147426	-0.336741	0.441811	-0.133514	0.0314098	-0.0899901	-0.0899901	0.269027	-0.351603	-0.351603	-0.0904007	-0.0904007	-0.275902	0.101909	0.310702	0.0406249	-0.334982	-0.334982	0.149084	-0.107017	-0.107017	-0.117328	0.0766372	-0.378008	-0.378008	-0.303349	0.129235
Succinic acid	-0.0971202	-0.0506514	-0.0444957	-0.129895	-0.0399896	0.196212	0.185428	0.230222	-0.304938	-0.211298	-0.211298	0.0233462	0.00876249	-0.130346	-0.130346	-0.106996	0.0283824	-0.0539185	0.278003	-0.165517	-0.165517	-0.208251	-0.311591	-0.212311	0.232289	0.0377348	-0.198671	-0.112097	-0.112097	-0.0224827	-0.0111024	-0.0111024	0.252517	0.252517	-0.191583	-0.208029	-0.145214	0.23436	-0.0701309	-0.0701309	-0.31163	-0.379694	-0.379694	-0.279745	0.363197	-0.459688	-0.459688	-0.286122	0.41883
4-Hydroxybutyric acid	-0.0400716	-0.0620296	-0.0670341	-0.283735	-0.0311032	-0.0295018	-0.0376743	0.0834227	-0.265045	-0.235257	-0.235257	-0.183434	-0.282767	-0.262136	-0.262136	-0.00612151	-0.212596	0.0336704	0.0367957	0.0161311	0.0161311	-0.0750628	0.0887017	-0.0695327	-0.0501504	-0.0536633	0.0446949	-0.188951	-0.188951	0.120519	-0.243094	-0.243094	-0.195694	-0.195694	-0.164516	0.213191	0.25443	-0.239	-0.0360195	-0.0360195	0.16119	0.159744	0.159744	-0.0466105	-0.104399	-0.0521252	-0.0521252	-0.0271746	-0.105416
Decanoic acid	0.0507221	-0.20887	-0.171853	-0.142259	0.202786	0.132703	0.140569	-0.0674088	-0.0330204	-0.0369932	-0.0369932	0.144027	0.0378	-0.2813	-0.2813	0.0795118	0.110537	-0.105656	-0.152	-0.290118	-0.290118	0.230537	0.219329	0.213257	0.299274	0.24823	-0.10862	0.153373	0.153373	0.286056	-0.235983	-0.235983	0.0367377	0.0367377	-0.19137	0.371825	0.452164	-0.0977626	-0.208329	-0.208329	0.325454	0.126245	0.126245	-0.198652	-0.181753	-0.0662474	-0.0662474	0.0130524	-0.21006
Tartaric acid	0.00674923	-0.0264603	-0.0099259	-0.376096	0.249586	0.204575	0.233134	-0.107145	-0.13309	-0.271679	-0.271679	0.24435	-0.0561692	0.113274	0.113274	-0.193059	0.0946909	-0.181871	0.245872	0.0127312	0.0127312	-0.373678	-0.112325	-0.392173	0.566107	0.125763	-0.384311	0.307049	0.307049	-0.114273	-0.148696	-0.148696	-0.0348029	-0.0348029	-0.187345	-0.168131	-0.150852	0.606697	-0.278624	-0.278624	-0.156181	-0.479755	-0.479755	-0.444451	0.531722	-0.65474	-0.65474	-0.635107	0.580366
beta-Phenyllactic acid	-0.0929159	-0.356164	-0.351418	-0.149794	0.219801	0.130028	0.142932	-0.0636019	-0.153133	-0.27444	-0.27444	0.0194737	-0.0822115	-0.226416	-0.226416	0.267833	0.00140147	-0.0608544	0.102258	-0.167242	-0.167242	-0.131917	0.278299	-0.138005	0.535125	-0.0415275	-0.0014953	-0.0866501	-0.0866501	0.405016	-0.202445	-0.202445	-0.0299569	-0.0299569	-0.198278	0.307471	0.411614	0.00760814	-0.132478	-0.132478	0.335607	-0.173552	-0.173552	-0.105962	-0.022263	-0.250952	-0.250952	-0.154729	-0.00389625
3-Hydroxyphenylacetic acid	-0.146039	0.124693	0.111709	0.21753	-0.23157	-0.115704	-0.143033	-0.213477	0.326895	0.412443	0.412443	-0.179222	-0.0512577	0.134261	0.134261	0.274711	-0.102537	0.143544	-0.246129	0.216376	0.216376	0.27972	0.0573775	0.294539	-0.442961	-0.0756121	0.564006	-0.231934	-0.231934	0.264291	-0.0238712	-0.0238712	-0.232039	-0.232039	0.330532	-0.180846	0.175708	-0.416293	0.193298	0.193298	-0.0457751	0.673397	0.673397	0.681596	-0.723051	0.708754	0.708754	0.801033	-0.759054
p-Hydroxyphenylacetic acid	-0.146405	-0.162324	-0.151269	-0.292755	0.208944	0.208282	0.228841	-0.0111407	-0.245928	-0.35916	-0.35916	0.277491	0.118142	-0.019141	-0.019141	-0.0384443	0.26965	-0.0873255	0.343202	0.0465757	0.0465757	-0.313586	-0.275087	-0.320508	0.530401	0.0518701	-0.425483	0.108703	0.108703	-0.0718847	-0.0254992	-0.0254992	0.223064	0.223064	-0.114308	-0.255536	-0.164857	0.483222	-0.274776	-0.274776	-0.308957	-0.5786	-0.5786	-0.442939	0.581964	-0.720435	-0.720435	-0.641572	0.669078
Ribofuranose (isomer 1)	-0.13567	-0.0608533	-0.06094	-0.271316	0.0619638	0.14992	0.159272	0.0685586	-0.30351	-0.420557	-0.420557	0.192112	-0.0177233	-0.0258022	-0.0258022	-0.153797	0.0826162	-0.142113	0.41808	0.0617003	0.0617003	-0.460448	-0.228041	-0.47244	0.417105	-0.0142429	-0.336834	0.0290012	0.0290012	-0.176654	-0.0880565	-0.0880565	0.10652	0.10652	-0.217181	-0.19756	-0.266073	0.459343	-0.282788	-0.282788	-0.249399	-0.652971	-0.652971	-0.417498	0.685715	-0.746922	-0.746922	-0.708287	0.780246
3-Hydroxyphenylpropionic acid	0.175061	-0.0670784	-0.0853313	0.234632	-0.163322	-0.0254076	-0.0503176	-0.290626	0.146466	0.366026	0.366026	-0.0598048	-0.0290426	0.180893	0.180893	0.11771	-0.0287942	-0.0626613	-0.0539638	-0.115151	-0.115151	0.215295	0.0710065	0.2039	-0.446987	-0.160278	0.558568	-0.147633	-0.147633	0.0703576	-0.00247206	-0.00247206	-0.146671	-0.146671	-0.00260492	0.208927	0.0441717	-0.349468	0.612496	0.612496	0.147047	0.385065	0.385065	0.500933	-0.449164	0.5879	0.5879	0.416825	-0.53007
Azelaic acid	0.00532922	0.0317076	0.0383414	-0.292974	0.0830757	0.184896	0.194309	0.0804639	-0.214767	-0.307848	-0.307848	0.140384	-0.00163701	-0.03022	-0.03022	-0.218023	0.0943332	-0.108082	0.226584	0.28654	0.28654	-0.296949	-0.193408	-0.306847	0.241762	0.0598833	-0.371231	0.172588	0.172588	-0.235654	-0.18439	-0.18439	-0.0550878	-0.0550878	-0.0968754	-0.0714416	-0.177171	0.473631	-0.250348	-0.250348	-0.166279	-0.514677	-0.514677	-0.384953	0.615648	-0.670307	-0.670307	-0.602533	0.672518
5-Hydroxyindoleacetic acid	-0.0474163	0.0460068	0.0253644	-0.0943419	0.00549269	0.0649477	0.0524458	-0.110724	-0.0264029	-0.0417778	-0.0417778	-0.0384236	-0.118071	-0.143452	-0.143452	0.0341657	-0.0639855	-0.0731627	-0.163496	-0.244041	-0.244041	0.114255	0.123175	0.102952	-0.259061	-0.154121	0.249858	-0.197514	-0.197514	0.0734261	-0.127165	-0.127165	-0.0747761	-0.0747761	-0.210425	0.174694	0.170797	-0.282638	0.172078	0.172078	0.166712	0.482207	0.482207	0.113665	-0.403119	0.350477	0.350477	0.287193	-0.430682
Dehydroabietic acid	-0.189246	0.218987	0.17707	0.0293256	0.152567	-0.164155	-0.134247	-0.044604	-0.333918	-0.339257	-0.339257	0.233742	0.0147392	-0.360234	-0.360234	-0.00875451	0.0642111	-0.117087	-0.0843504	0.0637531	0.0637531	-0.290465	-0.0478864	-0.301644	0.0364583	-0.284996	0.102699	-0.0532821	-0.0532821	-0.00204795	0.164015	0.164015	-0.15721	-0.15721	-0.0777981	-0.0208314	0.0977004	0.105941	-0.204357	-0.204357	-0.042649	-0.0418413	-0.0418413	0.0513062	0.0829589	-0.130572	-0.130572	-0.0487315	0.132464
Ethylene glycol	-0.0400373	-0.32668	-0.289497	0.00113248	-0.301601	0.0128484	-0.0263777	-0.0210544	-0.0851706	0.0889649	0.0889649	-0.220687	-0.101175	0.0747865	0.0747865	0.295025	-0.0728783	0.239083	0.355742	-0.248695	-0.248695	0.174881	0.0746465	0.203813	0.0431687	0.22332	0.233135	0.141854	0.141854	0.281864	-0.384857	-0.384857	-0.176754	-0.176754	-0.168206	0.219483	0.27106	-0.278653	0.54031	0.54031	0.154512	0.0618581	0.0618581	0.120902	-0.197859	0.0840704	0.0840704	-0.162551	-0.207694
Propylene glycol	-0.120119	-0.181773	-0.144079	0.215276	-0.123743	0.200701	0.171023	0.0698459	0.444499	0.253467	0.253467	-0.180088	0.0594969	0.277376	0.277376	0.0888869	-0.0947674	0.0837217	-0.147996	-0.216647	-0.216647	0.444024	0.145495	0.448567	-0.0290835	0.259658	0.198834	-0.156407	-0.156407	0.273176	-0.284979	-0.284979	-0.279046	-0.279046	-0.0875506	0.200588	0.238134	-0.107875	0.0876274	0.0876274	0.19421	0.345763	0.345763	0.132613	-0.454445	0.362387	0.362387	0.425909	-0.470833
1,3 Propanediol	-0.0863374	0.0758583	0.0652888	-0.0100228	-0.285512	-0.255387	-0.276989	-0.272096	-0.187961	0.0899753	0.0899753	-0.232668	-0.461705	-0.109626	-0.109626	0.213813	-0.407247	0.18619	-0.023778	0.412389	0.412389	-0.11191	0.00735416	-0.0857563	-0.13406	-0.0672665	0.288979	-0.235282	-0.235282	0.152483	0.295493	0.295493	0.0370845	0.0370845	0.325837	-0.206867	0.0380707	-0.374914	0.114885	0.114885	-0.0923329	0.28089	0.28089	0.431794	-0.320277	0.340639	0.340639	0.321521	-0.331456
1,4-Butanediol	0.10878	-0.0760074	-0.0846288	-0.35383	0.377507	0.272244	0.310554	0.0684564	-0.138864	-0.378659	-0.378659	0.348844	0.182484	-0.0336754	-0.0336754	-0.172277	0.309632	-0.214909	0.112618	-0.0463642	-0.0463642	-0.31568	-0.0625532	-0.339372	0.450463	-0.0855761	-0.4445	0.245073	0.245073	-0.140391	-0.18398	-0.18398	-0.0130225	-0.0130225	-0.217782	0.0360645	-0.0470017	0.667069	-0.314799	-0.314799	-0.0259262	-0.552409	-0.552409	-0.514637	0.602466	-0.732688	-0.732688	-0.595696	0.635306
1-Hexadecanol	0.0556979	-0.0237781	-0.0103423	-0.0397506	-0.00693002	0.152757	0.138736	0.0626847	0.409538	0.0738343	0.0738343	0.103859	0.205668	0.0857587	0.0857587	-0.176303	0.150642	-0.165619	0.0303067	-0.128699	-0.128699	0.267106	0.153796	0.241395	-0.266113	0.101688	-0.184566	0.183629	0.183629	-0.249839	-0.236686	-0.236686	-0.147474	-0.147474	-0.0278966	0.0997674	-0.214691	-0.0855472	0.00138836	0.00138836	0.152445	0.135099	0.135099	-0.180695	0.0289084	0.0477901	0.0477901	-0.0736548	0.0193659
Octadecan-1-ol	0.093096	-0.00224805	0.00910147	-0.00258916	-0.0559035	0.146075	0.126879	0.0455105	0.427494	0.146261	0.146261	0.0822886	0.189534	0.117318	0.117318	-0.166281	0.123059	-0.164852	0.0317671	-0.123178	-0.123178	0.276279	0.158657	0.250535	-0.32752	0.0898706	-0.114646	0.214239	0.214239	-0.254464	-0.248767	-0.248767	-0.164041	-0.164041	-0.0235958	0.105181	-0.219359	-0.11155	0.077949	0.077949	0.158327	0.153412	0.153412	-0.115548	-0.0002273	0.105832	0.105832	-0.0401396	-0.020754
Nonane	0.245163	0.255544	0.287688	0.215867	-0.243893	-0.218517	-0.238913	-0.0836594	0.104925	0.32664	0.32664	-0.0877468	-0.143189	0.10275	0.10275	-0.0849473	-0.234542	-0.338111	-0.0727306	0.272337	0.272337	0.383998	0.183048	0.333865	-0.309777	0.312855	-0.023012	0.00845394	0.00845394	-0.0157241	0.130966	0.130966	-0.220851	-0.220851	0.260424	0.146911	-0.175976	-0.385964	0.326737	0.326737	0.194699	0.230675	0.230675	0.116713	-0.201086	0.283918	0.283918	0.449758	-0.274044
l-Alanine	-0.0213701	-0.320358	-0.239903	-0.0853998	-0.0860816	0.214272	0.184048	-0.0597532	-0.0246623	-0.133613	-0.133613	-0.251896	-0.141953	-0.164107	-0.164107	-0.0921224	-0.0883523	0.00874305	0.0590576	-0.119229	-0.119229	0.0369453	0.171977	0.0375572	0.437138	0.569277	-0.0841675	-0.087588	-0.087588	0.127001	-0.267582	-0.267582	-0.0952436	-0.0952436	-0.0734757	0.144767	0.0633793	-0.219073	-0.0400675	-0.0400675	0.186097	-0.0617679	-0.0617679	-0.114458	0.0301592	-0.177618	-0.177618	-0.145808	0.0377096
L-Valine	-0.0691701	-0.302994	-0.294966	-0.309449	0.0164804	0.180416	0.168085	-0.0843891	-0.0509126	-0.259887	-0.259887	-0.0735039	-0.247308	-0.292438	-0.292438	0.0674774	-0.15404	0.502794	-0.185945	0.0546882	0.0546882	-0.109502	0.250709	-0.0416894	0.24081	-0.00356056	-0.0520546	0.0703966	0.0703966	0.048378	-0.263407	-0.263407	-0.154413	-0.154413	-0.211749	-0.110309	0.355326	-0.0417214	-0.230002	-0.230002	0.120026	0.00194301	0.00194301	-0.158536	0.00700514	-0.0877955	-0.0877955	-0.27808	0.022901
Valine	0.134716	-0.0373546	-0.0318489	-0.358454	0.227623	0.166746	0.19059	0.148885	-0.169766	-0.364079	-0.364079	0.215856	0.0226034	-0.138726	-0.138726	-0.171116	0.101681	-0.140277	0.0778074	-0.0996034	-0.0996034	-0.332299	0.0788497	-0.345921	0.472808	0.03552	-0.464013	0.406163	0.406163	-0.129876	-0.232558	-0.232558	-0.0300515	-0.0300515	-0.25593	-0.057014	-0.0141055	0.433177	-0.348374	-0.348374	0.027242	-0.520198	-0.520198	-0.552313	0.582313	-0.708633	-0.708633	-0.591894	0.607541
l-Leucine	0.23999	-0.0316028	-0.016149	-0.366113	0.17391	0.0651259	0.0897101	0.11169	-0.219234	-0.22503	-0.22503	0.208741	0.0320818	-0.0352114	-0.0352114	-0.205676	0.142083	-0.105071	0.0785875	-0.0512162	-0.0512162	-0.294776	-0.0760454	-0.304309	0.350681	0.116013	-0.373969	0.593861	0.593861	-0.171168	-0.275525	-0.275525	-0.087208	-0.087208	-0.212691	0.02185	0.0434457	0.396928	-0.27551	-0.27551	-0.041871	-0.473064	-0.473064	-0.448524	0.569947	-0.669166	-0.669166	-0.642611	0.570822
Leucine	-0.0685324	0.142683	0.135218	-0.12818	-0.0460374	0.168449	0.160379	0.238749	-0.249572	-0.258094	-0.258094	-0.165606	-0.0760769	-0.17313	-0.17313	-0.119519	-0.069232	-0.0638297	0.300002	0.264876	0.264876	-0.364576	-0.0345255	-0.367659	0.166238	-0.0276582	-0.153344	-0.0892069	-0.0892069	-0.126016	-0.209716	-0.209716	-0.0373553	-0.0373553	-0.069089	-0.00389023	-0.162919	0.279659	-0.101472	-0.101472	-0.0255108	-0.511809	-0.511809	-0.174352	0.503919	-0.523212	-0.523212	-0.443784	0.566524
Isoleucine	0.207243	-0.00498655	0.00366839	-0.385534	0.14913	0.158531	0.175923	0.130861	-0.139545	-0.273813	-0.273813	0.203691	0.0253577	-0.00876962	-0.00876962	-0.28937	0.116786	-0.154774	0.113913	-0.0211881	-0.0211881	-0.337431	-0.0831604	-0.352887	0.304845	0.0678049	-0.403766	0.484666	0.484666	-0.255052	-0.28571	-0.28571	-0.0954927	-0.0954927	-0.21204	-0.108198	-0.12531	0.458839	-0.289388	-0.289388	-0.107967	-0.494481	-0.494481	-0.474976	0.631939	-0.707944	-0.707944	-0.614173	0.645871
beta-Alanine	0.0567442	0.0012937	-0.00736318	0.330632	-0.146043	-0.106554	-0.11594	-0.12999	0.379148	0.448571	0.448571	-0.188731	0.129597	0.274637	0.274637	0.298639	0.0463295	0.190092	-0.196713	0.470201	0.470201	0.16945	-0.0188292	0.192009	-0.329958	-0.0686428	0.354732	-0.13137	-0.13137	0.18524	0.13532	0.13532	-0.2941	-0.2941	0.648077	0.0881575	0.108527	-0.0795834	0.282746	0.282746	0.0285834	0.394403	0.394403	0.660947	-0.501806	0.56787	0.56787	0.587333	-0.561615
Serine	0.0906655	-0.108496	-0.0918224	-0.328861	0.135356	0.219955	0.236002	0.0166718	-0.0514621	-0.264309	-0.264309	0.310852	0.0819738	0.178447	0.178447	-0.224359	0.179987	-0.215676	0.235833	-0.0457473	-0.0457473	-0.247959	-0.163584	-0.272741	0.36001	0.108602	-0.384385	0.349783	0.349783	-0.188132	-0.244244	-0.244244	-0.118051	-0.118051	-0.197513	0.00757073	-0.157032	0.604143	-0.241475	-0.241475	-0.108631	-0.478094	-0.478094	-0.449882	0.570659	-0.667919	-0.667919	-0.617364	0.604491
L-Threonine	0.0668976	-0.00995883	-0.0247912	0.0420553	0.179429	-0.0995223	-0.0788978	-0.184072	-0.0263885	0.111916	0.111916	0.158124	-0.08902	-0.0657038	-0.0657038	-0.122165	-0.0727602	-0.217241	-0.116073	0.395388	0.395388	-0.135725	-0.141391	-0.162352	-0.115483	-0.120321	-0.128309	-0.0220997	-0.0220997	-0.163741	0.325705	0.325705	-0.0484758	-0.0484758	0.150534	0.101911	-0.0540785	-0.140895	-0.190723	-0.190723	-0.0490024	0.0837576	0.0837576	-0.035959	-0.00542293	0.130935	0.130935	-0.0486877	-0.0206691
Glycine	0.173133	0.283098	0.322986	0.0900271	0.0915506	0.0564985	0.0566725	0.100489	0.307612	0.172146	0.172146	-0.0191293	0.183098	0.0668976	0.0668976	-0.278706	0.100716	-0.288394	-0.239947	-0.0933797	-0.0933797	0.555336	0.306249	0.509248	-0.249461	0.380654	-0.206898	0.25025	0.25025	-0.204419	-0.221775	-0.221775	-0.325901	-0.325901	-0.0844718	0.363889	-0.058444	-0.164882	0.133417	0.133417	0.381333	0.230284	0.230284	-0.230628	-0.0763858	0.150963	0.150963	0.120259	-0.121722
Homoserine	0.198507	-0.3289	-0.312935	-0.286809	0.221765	0.317315	0.324946	-0.0336406	0.135908	-0.221304	-0.221304	0.175346	-0.036344	-0.0550445	-0.0550445	-0.0474589	0.0134767	-0.158449	-0.0169425	-0.114079	-0.114079	-0.132335	0.294028	-0.15127	0.449502	0.0538745	-0.36697	0.355125	0.355125	-0.00210251	-0.267726	-0.267726	-0.0656377	-0.0656377	-0.192266	0.171372	0.0882634	0.265785	-0.23418	-0.23418	0.28233	-0.284009	-0.284009	-0.431453	0.287198	-0.424252	-0.424252	-0.372277	0.270552
Aspartate	-0.00609817	-0.293821	-0.289164	-0.378475	0.219999	0.0998628	0.124967	0.105622	-0.237965	-0.406556	-0.406556	0.169235	0.0743963	-0.0710379	-0.0710379	0.0185343	0.211795	0.0891781	0.22638	-0.135325	-0.135325	-0.308034	0.00126533	-0.291792	0.475284	-0.0283561	-0.274728	0.239136	0.239136	0.0318381	-0.352655	-0.352655	-0.142548	-0.142548	-0.298795	0.101249	0.218514	0.343164	-0.252057	-0.252057	0.0485278	-0.480055	-0.480055	-0.404709	0.460337	-0.638517	-0.638517	-0.702807	0.505081
DL-Phenylalanine	-0.0181361	-0.0487042	-0.0265568	-0.266536	0.0320764	0.190103	0.181991	-0.0158048	-0.180249	-0.346281	-0.346281	0.0181695	-0.276699	-0.31765	-0.31765	-0.238167	-0.217917	-0.0751975	0.133767	0.0840722	0.0840722	-0.297718	0.18734	-0.303274	0.408024	0.165503	-0.374077	0.121784	0.121784	-0.18876	-0.0788188	-0.0788188	-0.0226456	-0.0226456	-0.220203	-0.209499	-0.187089	0.0701808	-0.258509	-0.258509	0.0298729	-0.412497	-0.412497	-0.452585	0.482251	-0.500595	-0.500595	-0.520604	0.531712
2-Aminoadipic acid	-0.128775	-0.0042305	-0.0195747	-0.122743	0.234003	0.271179	0.277135	-0.0684238	-0.174415	-0.205436	-0.205436	-0.0440423	-0.258057	-0.314644	-0.314644	0.0628781	-0.216444	-0.149116	0.0935886	0.095948	0.095948	-0.208022	0.158747	-0.224622	0.423706	-0.123121	-0.297018	-0.0716857	-0.0716857	0.0131585	0.247401	0.247401	0.625859	0.625859	-0.128892	-0.13325	-0.121288	0.0607361	-0.206327	-0.206327	0.0461544	-0.321559	-0.321559	-0.335109	0.240491	-0.271588	-0.271588	-0.23745	0.291529
Phenylalanine	0.215226	-0.0718638	-0.0622547	-0.394967	0.153467	0.312562	0.319424	0.0732181	0.0242032	-0.27639	-0.27639	0.169614	-0.0298375	-0.0512608	-0.0512608	-0.242596	0.0422833	-0.160278	0.0341712	-0.0878737	-0.0878737	-0.261016	0.123124	-0.278312	0.349899	0.0605079	-0.403511	0.410892	0.410892	-0.193252	-0.310622	-0.310622	-0.0699911	-0.0699911	-0.204972	-0.0585856	-0.110888	0.45545	-0.269179	-0.269179	0.0568682	-0.389566	-0.389566	-0.471018	0.502187	-0.602456	-0.602456	-0.474596	0.502128
Tyrosine	0.129926	-0.076855	-0.0752303	-0.413382	0.179972	0.379048	0.38428	0.172608	0.0623776	-0.33166	-0.33166	0.0492771	-0.0262978	-0.0544216	-0.0544216	-0.165583	0.0232234	-0.137925	0.09427	-0.0999835	-0.0999835	-0.234933	0.211764	-0.249667	0.367608	-0.00417927	-0.402407	0.239971	0.239971	-0.110769	-0.388664	-0.388664	-0.0402331	-0.0402331	-0.216059	0.0289596	-0.0739228	0.469539	-0.260628	-0.260628	0.158872	-0.390401	-0.390401	-0.475875	0.458269	-0.602648	-0.602648	-0.438034	0.472857
N-Acetyl-D-glucosamine (isomer 2)	0.0101935	0.0380425	0.0300622	-0.239707	0.211838	0.201312	0.225865	0.153145	-0.254377	-0.360288	-0.360288	0.283545	0.118626	-0.0904924	-0.0904924	-0.2874	0.189591	-0.171416	0.180608	-0.0450296	-0.0450296	-0.404521	-0.261278	-0.421189	0.347821	-0.055071	-0.378491	0.129756	0.129756	-0.218018	-0.0593496	-0.0593496	0.0155999	0.0155999	-0.230446	-0.229057	-0.212616	0.590512	-0.286861	-0.286861	-0.287022	-0.557755	-0.557755	-0.461958	0.637602	-0.703975	-0.703975	-0.54311	0.69547
Ethylbenzene	-0.185368	0.245459	0.193912	0.0834038	-0.0411436	-0.268897	-0.256359	-0.122789	0.0236961	0.269752	0.269752	-0.11941	-0.14233	0.200214	0.200214	0.397152	-0.151156	0.0206286	0.102554	0.52689	0.52689	-0.262647	-0.116334	-0.256096	-0.0910588	-0.355784	0.274532	-0.000503455	-0.000503455	0.226296	0.226932	0.226932	-0.0596559	-0.0596559	0.440491	-0.371599	0.0284703	-0.077765	0.0469261	0.0469261	-0.254708	0.113691	0.113691	0.479297	-0.24098	0.22818	0.22818	0.284825	-0.222871
p-Xylene	0.139669	0.119554	0.139874	0.0728382	0.265634	0.242872	0.252316	0.121885	0.357443	0.0557208	0.0557208	0.045956	0.356563	-0.0101942	-0.0101942	-0.256037	0.299519	-0.17422	-0.245391	-0.244304	-0.244304	0.475213	0.279869	0.445331	-0.198277	0.188425	-0.214792	0.20523	0.20523	-0.241638	-0.242849	-0.242849	-0.199761	-0.199761	-0.165417	0.36886	-0.0405358	0.00564006	0.138932	0.138932	0.36558	0.172012	0.172012	-0.280437	-0.025759	0.105923	0.105923	-0.0061535	-0.058951
Tributyl acetylcitrate	0.0188182	0.0141837	0.0385667	-0.0923887	-0.10988	0.0675572	0.0455012	0.0639027	0.299927	-0.00136578	-0.00136578	0.0549238	0.0260904	0.0415269	0.0415269	-0.17145	-0.0301086	-0.136908	0.0524202	-0.197302	-0.197302	0.353226	0.235011	0.330039	-0.245708	0.19731	-0.217622	0.231607	0.231607	-0.221132	-0.22631	-0.22631	-0.137792	-0.137792	-0.137337	0.0965693	-0.184344	-0.212733	0.0413833	0.0413833	0.206641	0.177472	0.177472	-0.268166	0.00312416	0.0488902	0.0488902	-0.0846143	-0.000726181
Myristic acid	0.131536	0.20068	0.213155	0.191818	-0.0567034	-0.315616	-0.31065	0.099722	0.320928	0.331617	0.331617	-0.115319	0.114919	0.124091	0.124091	-0.0471782	-0.0105422	0.097429	-0.337842	0.0126176	0.0126176	0.431719	0.235284	0.438246	-0.45265	0.144029	0.180177	0.177805	0.177805	0.0284308	-0.172867	-0.172867	-0.612033	-0.612033	0.129501	0.158605	0.230164	-0.388778	0.145105	0.145105	0.23603	0.521978	0.521978	0.230357	-0.446984	0.507482	0.507482	0.451345	-0.518098
Pentadecanoic acid ester	0.109167	0.267787	0.236412	-0.105982	-0.0407426	-0.0134245	-0.00995682	0.400961	0.0618968	0.0572514	0.0572514	0.0359675	0.23275	0.0289946	0.0289946	-0.24121	0.160081	-0.16269	0.238653	0.141476	0.141476	-0.364964	-0.177978	-0.38106	-0.251372	-0.190189	-0.156086	0.170891	0.170891	-0.313623	-0.284414	-0.284414	-0.197633	-0.197633	0.0598214	-0.178766	-0.282071	0.219258	-0.217427	-0.217427	-0.206216	-0.326408	-0.326408	-0.108801	0.448195	-0.359155	-0.359155	-0.319105	0.466406
Palmitic acid	0.0917448	0.0918536	0.106083	0.160834	-0.321044	-0.216066	-0.234091	0.0296002	-0.174896	-0.0804449	-0.0804449	0.4075	-0.00898884	-0.231666	-0.231666	-0.15676	-0.0971448	-0.204061	-0.0142437	0.0221624	0.0221624	-0.0706754	-0.103485	-0.0965166	-0.0758034	0.133762	-0.314233	0.211918	0.211918	-0.285038	0.426231	0.426231	0.0168102	0.0168102	0.0827339	-0.0422449	-0.270017	-0.0451838	-0.195574	-0.195574	-0.0908612	-0.210763	-0.210763	-0.23893	0.311069	-0.142879	-0.142879	-0.17656	0.320189
Linoleic acid	0.0279607	0.0892794	0.0707163	-0.00358685	-0.162813	-0.0636012	-0.073762	0.0912761	-0.187399	-0.171683	-0.171683	0.0373735	-0.0956704	-0.0181982	-0.0181982	-0.0816179	-0.121152	-0.241075	0.146358	0.219089	0.219089	-0.368892	-0.14207	-0.395254	0.0512062	-0.127926	-0.192448	-0.138101	-0.138101	-0.2398	0.331186	0.331186	0.255829	0.255829	0.145311	-0.148939	-0.415178	0.0512095	-0.188027	-0.188027	-0.167548	-0.412754	-0.412754	-0.0963941	0.441787	-0.30879	-0.30879	-0.191774	0.47728
9-Octadecenoic acid ester	0.0122057	0.0622913	0.0532847	0.215787	-0.238952	-0.20501	-0.219276	-0.120131	-0.196644	-0.116701	-0.116701	0.197875	-0.159245	-0.17447	-0.17447	-0.0338619	-0.216304	-0.160851	-0.0429328	0.21365	0.21365	-0.220492	-0.013737	-0.238456	0.0146614	-0.0578427	-0.15583	-0.113112	-0.113112	-0.238716	0.612357	0.612357	0.223043	0.223043	0.148732	-0.146916	-0.349013	-0.166002	-0.132472	-0.132472	-0.0785783	-0.249671	-0.249671	-0.0616588	0.259022	-0.021091	-0.021091	-0.0670815	0.280754
trans-13-Octadecenoic acid	0.0896533	0.103796	0.0938411	0.311252	-0.301617	-0.205737	-0.222631	-0.0279005	-0.132442	0.0735493	0.0735493	0.243914	-0.0548578	-0.172	-0.172	-0.0184366	-0.171967	-0.00971585	-0.21546	0.294791	0.294791	-0.137419	-0.196004	-0.136692	-0.164043	-0.0561519	-0.121801	0.0666957	0.0666957	-0.219503	0.616152	0.616152	0.164096	0.164096	0.280258	-0.154381	-0.200732	-0.0475891	-0.146092	-0.146092	-0.207101	-0.0953331	-0.0953331	0.0383397	0.122609	0.108709	0.108709	0.0958572	0.114421
Oleic acid	-0.130628	0.020073	-0.012282	-0.171152	-0.0809329	0.00684768	-0.00999917	-0.157089	-0.135592	-0.115345	-0.115345	-0.0452097	-0.227287	-0.185857	-0.185857	0.0945123	-0.134457	0.0293015	-0.119888	-0.218204	-0.218204	-0.0730614	-0.0180191	-0.0681359	-0.228088	-0.253158	0.388258	-0.167209	-0.167209	0.137937	-0.10745	-0.10745	0.0155387	0.0155387	-0.174548	-0.115576	0.17277	-0.277718	0.0903463	0.0903463	-0.0667626	0.494772	0.494772	0.257055	-0.409038	0.287165	0.287165	0.335356	-0.41883
Stearic acid	0.111826	0.0695454	0.0868732	0.30762	-0.374564	-0.369597	-0.389633	-0.064755	-0.150001	0.0225996	0.0225996	0.46581	-0.0243137	-0.266933	-0.266933	-0.105092	-0.144225	-0.089065	-0.179113	-0.0514308	-0.0514308	0.104079	-0.0121378	0.0908301	-0.223975	0.153461	-0.194472	0.328696	0.328696	-0.268691	0.481353	0.481353	-0.10061	-0.10061	0.00534629	0.0042018	-0.11659	-0.296035	-0.0806799	-0.0806799	-0.00634695	0.00607517	0.00607517	-0.172064	0.0970057	0.141062	0.141062	-0.0610242	0.0815207
Arachidonic acid	0.00109589	0.257834	0.239656	-0.201325	0.0106925	0.0311903	0.0373078	0.0784978	-0.197309	-0.465173	-0.465173	0.171541	-0.127595	-0.261587	-0.261587	-0.137001	-0.104602	-0.142581	0.0124208	0.0447905	0.0447905	-0.238521	0.326158	-0.253816	0.207266	-0.0873252	-0.414319	0.0618709	0.0618709	-0.281939	0.0751111	0.0751111	-0.00676695	-0.00676695	-0.178492	-0.0441263	-0.24082	0.242082	-0.219234	-0.219234	0.202927	-0.412888	-0.412888	-0.466765	0.507094	-0.432138	-0.432138	-0.421821	0.554661
Eicosanoic acid	-0.0437179	-0.0213378	-0.0138883	0.250943	-0.24036	-0.265484	-0.276904	-0.214989	-0.245591	-0.137498	-0.137498	0.379649	-0.145764	-0.276683	-0.276683	-0.00428596	-0.18925	-0.0953157	-0.0802626	0.0955974	0.0955974	-0.113034	-0.0208193	-0.123936	0.0839728	0.0545649	-0.178675	0.0433054	0.0433054	-0.16138	0.623146	0.623146	0.123305	0.123305	0.0515053	-0.172008	-0.198094	-0.208638	-0.140736	-0.140736	-0.0952467	-0.153076	-0.153076	-0.133502	0.164391	0.0167351	0.0167351	-0.0909507	0.189519
1-Monopalmitin	0.00691286	0.167728	0.170976	0.257455	-0.201284	-0.235191	-0.253762	-0.0609391	0.356128	0.336282	0.336282	-0.214934	-0.0178642	0.0911696	0.0911696	0.130001	-0.13395	0.162518	-0.300773	0.0502341	0.0502341	0.544419	0.313413	0.557873	-0.561688	0.0632174	0.343877	-0.0349976	-0.0349976	0.0884683	-0.0147672	-0.0147672	-0.432148	-0.432148	0.22856	0.216962	0.17834	-0.505586	0.363716	0.363716	0.317085	0.691031	0.691031	0.429836	-0.657381	0.756379	0.756379	0.619581	-0.720881
9-Octadecenoic acid, -2-propyl ester	0.0244033	-0.024517	-0.0487328	0.241488	-0.263294	-0.249432	-0.272082	-0.182127	0.131507	0.312342	0.312342	-0.238257	-0.147119	0.0890422	0.0890422	0.257268	-0.195564	0.191584	-0.200901	0.163721	0.163721	0.147923	0.0265186	0.170993	-0.489169	-0.19828	0.585705	-0.226035	-0.226035	0.192723	0.146197	0.146197	-0.145156	-0.145156	0.318887	0.0776976	0.175095	-0.469588	0.337106	0.337106	0.0547619	0.576928	0.576928	0.694965	-0.629396	0.702121	0.702121	0.654218	-0.694111
1-Monooleoylglycerol	0.0711125	0.016216	0.00500834	0.345049	-0.186909	-0.187929	-0.2071	-0.155802	0.308306	0.444304	0.444304	-0.249283	-0.0267475	0.194362	0.194362	0.188367	-0.124251	0.102649	-0.279333	0.169316	0.169316	0.303281	0.0888998	0.31237	-0.508866	-0.0856301	0.495493	-0.224194	-0.224194	0.119015	0.17422	0.17422	-0.181048	-0.181048	0.358671	0.227261	0.120788	-0.462062	0.33875	0.33875	0.167949	0.582038	0.582038	0.634831	-0.636048	0.785565	0.785565	0.669516	-0.711678
Stearic acid, 2,3-propyl ester	-0.0103699	0.144525	0.159931	0.0312511	-0.185769	-0.185999	-0.202563	0.0678323	0.26449	0.0988625	0.0988625	-0.0699999	0.0236063	0.0527144	0.0527144	-0.0315468	-0.0530671	0.0711483	-0.0706075	-0.115175	-0.115175	0.509444	0.280442	0.511375	-0.480711	0.154862	0.00802702	0.157284	0.157284	-0.111762	-0.163497	-0.163497	-0.35022	-0.35022	0.0120545	0.237645	0.0203466	-0.37435	0.227112	0.227112	0.304208	0.454124	0.454124	0.0135789	-0.298697	0.379555	0.379555	0.158429	-0.324574
Uracil	-0.0432977	0.125341	0.115472	-0.339311	0.0570654	0.169183	0.175601	0.153993	-0.25861	-0.396952	-0.396952	0.128182	-0.0357035	-0.120592	-0.120592	-0.247186	0.0496321	-0.164096	0.331089	0.118223	0.118223	-0.397624	-0.077815	-0.413429	0.226393	-0.0506731	-0.365833	0.0519884	0.0519884	-0.281796	-0.201372	-0.201372	0.00148854	0.00148854	-0.219675	-0.127962	-0.279155	0.423	-0.266625	-0.266625	-0.113604	-0.584191	-0.584191	-0.444893	0.687529	-0.706051	-0.706051	-0.668011	0.761886
Adenosine	-0.0694034	-0.126602	-0.142989	0.0663976	-0.156405	-0.0502441	-0.0746878	-0.0709039	0.0983681	0.102438	0.102438	-0.253956	-0.157487	-0.118554	-0.118554	0.262545	-0.181912	0.344736	-0.183645	-0.0855768	-0.0855768	0.346261	0.239308	0.386604	-0.390016	-0.15868	0.478252	-0.242069	-0.242069	0.295406	-0.165467	-0.165467	-0.204919	-0.204919	-0.0122259	0.232879	0.421065	-0.415278	0.3452	0.3452	0.273752	0.603865	0.603865	0.42363	-0.658774	0.592311	0.592311	0.515644	-0.705596
m-Hydroxybenzoic acid	-0.00704349	0.288121	0.267513	-0.169845	-0.264792	-0.260217	-0.274648	-0.111506	-0.208797	-0.0231133	-0.0231133	-0.346023	-0.425608	-0.123405	-0.123405	0.152043	-0.348128	0.264218	-0.00676666	0.267372	0.267372	-0.173779	0.25813	-0.136446	-0.119098	-0.0999207	0.326576	-0.177347	-0.177347	0.104859	-0.0342308	-0.0342308	-0.0829622	-0.0829622	0.172614	-0.140484	0.0814615	-0.215682	0.0972304	0.0972304	0.110912	0.127624	0.127624	0.384758	-0.157075	0.170082	0.170082	0.171681	-0.170332
protocatechuic acid	-0.00629089	0.0286485	0.048898	-0.0944595	-0.145703	-0.0088759	-0.0269931	0.180682	0.205635	-0.0437483	-0.0437483	0.0687376	0.09588	0.0450785	0.0450785	-0.159021	0.0322836	-0.0775496	0.129086	-0.227053	-0.227053	0.304919	0.12783	0.290255	-0.280566	0.167618	-0.211935	0.232701	0.232701	-0.211453	-0.279484	-0.279484	-0.159645	-0.159645	-0.157974	0.140746	-0.134831	-0.142307	0.013823	0.013823	0.153926	0.114916	0.114916	-0.27394	0.0632949	-0.0304728	-0.0304728	-0.168517	0.0706479
4-Hydroxyhydrocinnamic acid	0.248926	-0.128166	-0.142154	0.149363	-0.156122	-0.0384107	-0.0606409	-0.182118	0.0509155	0.222234	0.222234	-0.107753	-0.109224	0.0805506	0.0805506	0.159931	-0.116359	-0.0667177	0.0599467	-0.122488	-0.122488	0.267153	0.259913	0.254466	-0.327274	-0.139926	0.394868	-0.145358	-0.145358	0.150864	-0.0497313	-0.0497313	-0.1531	-0.1531	-0.0337157	0.371811	0.0991399	-0.314506	0.669426	0.669426	0.353283	0.217942	0.217942	0.337307	-0.333035	0.40089	0.40089	0.319586	-0.419262
Benzenepropanoic acid, 4-hydroxy-3-methoxy	0.0641983	-0.349444	-0.337945	-0.0165328	0.166619	0.0725903	0.0863566	0.027623	-0.119419	-0.194875	-0.194875	0.0505384	-0.0707814	-0.247282	-0.247282	0.175141	-0.0766264	0.0300485	0.0319716	-0.141275	-0.141275	0.0991283	0.364114	0.101638	0.388603	0.0137343	-0.187534	-0.159765	-0.159765	0.270103	0.0499563	0.0499563	0.0174096	0.0174096	-0.128974	0.651821	0.382292	0.0776406	-0.0737588	-0.0737588	0.556557	-0.229873	-0.229873	-0.236696	0.0214533	-0.123169	-0.123169	-0.201678	0.00933555
Hydrocaffeic acid	0.179395	-0.109459	-0.126297	-0.00504416	-0.221807	0.0338702	0.00344907	-0.169303	-0.195266	-0.00795002	-0.00795002	0.00197501	-0.174165	-0.052041	-0.052041	-0.0548053	-0.113558	-0.0996774	0.0356956	-0.190233	-0.190233	-0.0847745	-0.0300502	-0.0966635	-0.249999	-0.158451	0.40376	-0.187983	-0.187983	-0.0106938	-0.10227	-0.10227	-0.0629013	-0.0629013	-0.237816	0.108935	-0.00342312	-0.19997	0.364383	0.364383	0.030668	0.0909377	0.0909377	0.237613	-0.0869109	0.132084	0.132084	0.130974	-0.134618
Coprostanol	0.209175	0.0257638	-0.0044728	0.233545	0.274319	-0.0139119	0.0163479	-0.0916544	0.222337	0.362122	0.362122	0.0538822	0.471178	0.0717131	0.0717131	0.0435814	0.499207	-0.00563947	-0.265086	0.273585	0.273585	-0.103336	-0.278529	-0.10257	-0.259005	-0.235023	0.197432	-0.0473039	-0.0473039	-0.0560126	0.223984	0.223984	0.00614153	0.00614153	0.54669	-0.0689497	-0.0410414	0.0673928	0.101471	0.101471	-0.223487	0.194141	0.194141	0.465997	-0.194097	0.300709	0.300709	0.346622	-0.258469
L-Threonic acid	0.00500979	-0.0388405	-0.0248214	-0.399156	0.129219	0.163904	0.179776	-0.0392947	-0.166467	-0.300432	-0.300432	0.206014	-0.0351718	0.0648632	0.0648632	-0.20601	0.115463	-0.16672	0.352763	0.0952367	0.0952367	-0.361904	-0.118257	-0.378575	0.389851	0.102978	-0.358233	0.251535	0.251535	-0.194813	-0.252856	-0.252856	-0.0828476	-0.0828476	-0.172556	-0.0787748	-0.189411	0.486793	-0.258085	-0.258085	-0.118188	-0.523024	-0.523024	-0.413197	0.610224	-0.692686	-0.692686	-0.731273	0.666653
Ribonic acid	-0.204298	0.0205238	0.0376836	-0.411809	0.158978	0.0309516	0.0495051	0.0250179	-0.177835	-0.290508	-0.290508	-0.0619195	-0.136414	-0.0976486	-0.0976486	0.188655	0.00528724	0.129974	0.24167	-0.00703134	-0.00703134	0.0533815	0.327639	0.0697186	0.389709	0.141207	-0.222631	0.0774269	0.0774269	0.215927	-0.401681	-0.401681	-0.195471	-0.195471	-0.211853	0.327741	0.366418	0.164779	-0.136057	-0.136057	0.378988	-0.161895	-0.161895	-0.311987	0.100451	-0.325542	-0.325542	-0.492472	0.15492
L-Threitol	-0.236971	-0.241165	-0.184925	-0.324893	-0.0230576	0.117425	0.108207	-0.0191542	-0.239199	-0.353195	-0.353195	0.0693456	-0.265538	-0.376399	-0.376399	0.00553656	-0.176825	0.202821	0.0612537	-0.17849	-0.17849	0.207813	0.137879	0.231488	0.4454	0.394108	-0.251124	-0.150938	-0.150938	0.318974	-0.189187	-0.189187	-0.0920407	-0.0920407	-0.244636	0.0866355	0.379946	0.0451166	-0.307683	-0.307683	0.135346	0.0354374	0.0354374	-0.354907	-0.0676788	-0.264139	-0.264139	-0.129029	-0.0218643
Pinitol	-0.340928	-0.149589	-0.0884286	-0.145674	0.0347122	0.0741074	0.0715937	0.0784818	-0.240936	-0.155365	-0.155365	-0.272607	-0.167409	-0.242047	-0.242047	0.235936	-0.104765	0.460516	-0.0165131	-0.208441	-0.208441	0.384904	0.081912	0.43993	0.423804	0.453676	-0.055104	-0.147631	-0.147631	0.48107	-0.158154	-0.158154	0.0360644	0.0360644	-0.140435	0.288212	0.607889	-0.0246536	-0.0554674	-0.0554674	0.191847	0.203043	0.203043	-0.123652	-0.343535	0.0258274	0.0258274	-0.0150028	-0.30083
1,5-Anhydro-D-sorbitol	0.171677	-0.074289	-0.0690555	-0.430265	0.182131	0.390861	0.392749	0.0392143	0.104518	-0.261643	-0.261643	0.0755828	-0.0789315	-0.0373909	-0.0373909	-0.279827	0.00110078	-0.16432	0.0570877	0.0306138	0.0306138	-0.248756	0.152207	-0.266763	0.275177	0.0251279	-0.384932	0.320172	0.320172	-0.247272	-0.362432	-0.362432	-0.068017	-0.068017	-0.196391	-0.109197	-0.185703	0.378593	-0.254158	-0.254158	0.0529904	-0.341847	-0.341847	-0.449782	0.485035	-0.558618	-0.558618	-0.465018	0.492951
Ribitol	-0.194297	-0.127008	-0.115686	-0.31537	-0.00654254	0.0898705	0.0924328	0.0719116	-0.255044	-0.402907	-0.402907	0.126845	-0.102939	0.128824	0.128824	-0.0695969	-0.0130484	-0.191554	0.515032	0.032392	0.032392	-0.356874	-0.235481	-0.376889	0.453121	0.0618671	-0.405668	0.0277652	0.0277652	-0.111767	-0.0356242	-0.0356242	0.242761	0.242761	-0.17609	-0.24538	-0.329849	0.318649	-0.275492	-0.275492	-0.277012	-0.606234	-0.606234	-0.457719	0.631541	-0.733154	-0.733154	-0.650331	0.733878
Myoinositol-1	-0.120325	-0.248231	-0.244187	0.0937267	0.183236	0.313381	0.315416	-0.0117012	0.356389	0.244626	0.244626	0.0309915	0.322281	0.483641	0.483641	-0.00462425	0.302442	-0.0386691	0.138924	-0.0929258	-0.0929258	-0.267047	-0.150544	-0.26824	0.293779	-0.0230848	0.064995	-0.0894354	-0.0894354	-0.0888244	-0.28673	-0.28673	0.0627848	0.0627848	-0.235937	-0.0995859	-0.0840143	0.197561	-0.275775	-0.275775	-0.150129	-0.391295	-0.391295	-0.0660391	0.249539	-0.117276	-0.117276	-0.414874	0.299568
Myoinositol-2	-0.32101	-0.265374	-0.22305	-0.163875	0.0220905	0.0904426	0.0878833	0.0670903	-0.321619	-0.184014	-0.184014	-0.27419	-0.203775	-0.225113	-0.225113	0.341665	-0.123102	0.461442	0.10167	-0.265161	-0.265161	0.113546	0.0242741	0.172656	0.521153	0.277907	0.0665236	-0.186876	-0.186876	0.587006	-0.215926	-0.215926	0.0778328	0.0778328	-0.183998	0.2517	0.655341	0.0541171	-0.0180449	-0.0180449	0.135129	0.11793	0.11793	-0.0372599	-0.331417	-0.0337667	-0.0337667	-0.0585829	-0.291957
Myoinositol-3	-0.0203902	0.0199402	0.040722	-0.11307	-0.148103	0.0065259	-0.0128989	0.149403	0.212079	-0.0348403	-0.0348403	0.0632422	0.0807459	0.0331468	0.0331468	-0.144178	0.0309273	-0.0145297	0.0911689	-0.23762	-0.23762	0.340181	0.140109	0.333301	-0.293864	0.169917	-0.175001	0.211348	0.211348	-0.194898	-0.288712	-0.288712	-0.168947	-0.168947	-0.165606	0.157901	-0.0818226	-0.141752	0.0142808	0.0142808	0.170422	0.166884	0.166884	-0.244754	0.0092909	0.0215175	0.0215175	-0.150007	0.014658
Maltitol	0.154796	-0.229773	-0.238442	0.029874	0.0776748	0.0107412	0.00979787	-0.012299	0.144846	0.0426319	0.0426319	-0.164223	-0.0632003	-0.11592	-0.11592	0.31379	-0.0940313	0.0714766	-0.133358	-0.0721026	-0.0721026	0.299521	0.556393	0.304561	-0.022681	-0.1202	0.10254	-0.138391	-0.138391	0.307617	-0.115205	-0.115205	-0.0970128	-0.0970128	0.0242143	0.617878	0.415961	-0.263808	0.217679	0.217679	0.672454	0.187846	0.187846	0.104988	-0.356583	0.293003	0.293003	0.237245	-0.424297
Glycerol	-0.0475309	0.0971299	0.0862171	-0.267343	0.134194	0.0871292	0.106734	0.16261	-0.273511	-0.429728	-0.429728	0.197649	0.0449654	-0.071093	-0.071093	-0.209827	0.117617	-0.224844	0.286948	0.0484822	0.0484822	-0.378645	-0.141276	-0.402727	0.304532	-0.0652622	-0.434081	0.10485	0.10485	-0.267288	-0.000697878	-0.000697878	0.101652	0.101652	-0.159729	-0.186433	-0.32621	0.414227	-0.270567	-0.270567	-0.184653	-0.606814	-0.606814	-0.474637	0.700283	-0.721491	-0.721491	-0.610888	0.776775
Xylulose	-0.171549	-0.228704	-0.230541	-0.0335982	0.0730326	0.0696781	0.0629624	-0.202608	0.290263	0.0376772	0.0376772	-0.0574636	-0.0318935	0.103115	0.103115	0.170829	-0.00413446	0.0397652	-0.108662	-0.240252	-0.240252	0.184344	0.275269	0.186889	-0.0518278	-0.0655584	0.270562	-0.195888	-0.195888	0.156948	-0.176281	-0.176281	-0.172553	-0.172553	-0.136545	0.32322	0.257806	-0.302389	-0.0131853	-0.0131853	0.340942	0.410613	0.410613	0.171265	-0.438775	0.415971	0.415971	0.136546	-0.442357
Arabinose-1	-0.019863	0.275212	0.272533	-0.378589	0.0473906	0.0607057	0.0641587	0.0488138	-0.330148	-0.338911	-0.338911	-0.153483	-0.341595	-0.168764	-0.168764	-0.176529	-0.231599	-0.188857	0.214183	0.220367	0.220367	-0.360628	0.109531	-0.380233	0.31776	0.0399615	-0.34369	0.0207706	0.0207706	-0.207083	-0.00374414	-0.00374414	0.319164	0.319164	-0.110224	-0.273677	-0.331831	0.100899	-0.240245	-0.240245	-0.0537029	-0.468363	-0.468363	-0.36723	0.549716	-0.564368	-0.564368	-0.435477	0.605918
Arabinose-2	-0.190217	-0.0879715	-0.0814801	-0.333902	0.104948	0.201881	0.211217	0.0538825	-0.286839	-0.415732	-0.415732	0.111779	-0.0793646	0.0536943	0.0536943	-0.0895798	0.0390096	-0.185341	0.466006	0.0331955	0.0331955	-0.404204	-0.243332	-0.42271	0.528715	0.0320964	-0.385622	0.00843928	0.00843928	-0.0916345	-0.0526093	-0.0526093	0.298676	0.298676	-0.19859	-0.262665	-0.294444	0.438506	-0.27931	-0.27931	-0.290533	-0.634615	-0.634615	-0.451563	0.642754	-0.77204	-0.77204	-0.647869	0.74525
Ribose	-0.0858478	-0.0420784	-0.0462115	-0.292678	0.0638863	0.152787	0.16215	0.119622	-0.287027	-0.410998	-0.410998	0.206607	0.0114544	-0.0570523	-0.0570523	-0.188429	0.101973	-0.168822	0.420126	0.0871596	0.0871596	-0.435404	-0.220053	-0.451279	0.325949	-0.0422813	-0.375402	0.0587355	0.0587355	-0.222877	-0.122179	-0.122179	0.0751882	0.0751882	-0.200293	-0.128619	-0.271566	0.460075	-0.284799	-0.284799	-0.211468	-0.647295	-0.647295	-0.443271	0.710265	-0.759687	-0.759687	-0.725305	0.796138
Ribofuranose (isomer 2)	-0.28991	-0.10026	-0.0791663	-0.347591	-0.022253	0.145978	0.142635	-0.0316771	-0.310204	-0.411761	-0.411761	0.0141626	-0.220131	0.082757	0.082757	-0.00437462	-0.0839829	-0.0946918	0.501858	0.0619449	0.0619449	-0.320088	-0.18739	-0.327885	0.552931	0.145634	-0.27049	-0.0384166	-0.0384166	0.0214671	-0.107274	-0.107274	0.226197	0.226197	-0.200292	-0.300023	-0.222124	0.305663	-0.214945	-0.214945	-0.26975	-0.532505	-0.532505	-0.348926	0.512102	-0.688952	-0.688952	-0.571546	0.624238
Arabinose-3	-0.112059	-0.0982922	-0.103422	-0.165405	0.18727	0.224265	0.242532	0.0186303	-0.260534	-0.332609	-0.332609	0.23562	0.00741417	0.0224504	0.0224504	-0.100358	0.0821932	-0.200714	0.293763	-0.0698275	-0.0698275	-0.454438	-0.293922	-0.474235	0.556444	-0.0627335	-0.364644	0.0521654	0.0521654	-0.113689	0.165466	0.165466	0.419268	0.419268	-0.205204	-0.305292	-0.293663	0.516196	-0.282619	-0.282619	-0.345296	-0.629883	-0.629883	-0.436188	0.602566	-0.659417	-0.659417	-0.546187	0.684058
Fructofuranose (isomer 1)	-0.0696171	0.23713	0.232108	-0.3509	0.0591771	0.225805	0.228242	0.0332133	-0.232576	-0.378676	-0.378676	0.0293259	-0.166039	-0.153587	-0.153587	-0.126905	-0.0574924	-0.10889	0.189077	0.130761	0.130761	-0.296268	0.142913	-0.306282	0.329328	0.0128234	-0.3244	0.0336893	0.0336893	-0.178175	-0.178279	-0.178279	0.125799	0.125799	-0.207833	-0.0844843	-0.187031	0.416346	-0.229104	-0.229104	0.0582494	-0.470887	-0.470887	-0.401384	0.526304	-0.569144	-0.569144	-0.525171	0.591257
Glucopyranose-1	-0.104443	0.0118812	0.00767799	-0.241738	0.00146146	0.154089	0.155271	0.100896	-0.32112	-0.448155	-0.448155	0.156441	-0.112698	-0.108754	-0.108754	-0.080524	-0.0522061	-0.181245	0.329111	0.0360028	0.0360028	-0.414698	-0.0765234	-0.432512	0.437971	-0.0308225	-0.427723	0.0316368	0.0316368	-0.169661	0.0434604	0.0434604	0.326943	0.326943	-0.208473	-0.148005	-0.28898	0.397157	-0.294813	-0.294813	-0.122153	-0.648038	-0.648038	-0.494638	0.662426	-0.699991	-0.699991	-0.618674	0.747884
Glucose	0.17594	0.0566581	0.0528533	0.326839	-0.200748	-0.297459	-0.30767	0.131959	0.133145	0.272419	0.272419	-0.392169	0.0145314	0.0168445	0.0168445	0.0100616	-0.120007	0.303709	-0.288611	0.186083	0.186083	0.242411	0.0392478	0.278867	-0.525643	-0.0176777	0.370873	-0.170401	-0.170401	0.012119	0.137533	0.137533	-0.16605	-0.16605	0.380689	0.222975	0.103736	-0.37487	0.26534	0.26534	0.131878	0.399863	0.399863	0.53438	-0.397517	0.551238	0.551238	0.540087	-0.473747
Talofuranose (isomer 1)	0.022711	-0.111416	-0.113635	-0.286522	0.0265172	0.0763312	0.0895722	0.200168	-0.132029	-0.254153	-0.254153	0.295686	0.21802	0.122664	0.122664	-0.0870069	0.286584	-0.054481	0.353004	-0.147091	-0.147091	-0.28778	-0.254326	-0.290752	0.181663	-0.0424832	-0.266528	0.284223	0.284223	-0.119697	-0.336964	-0.336964	-0.0918818	-0.0918818	-0.194612	0.0394115	-0.0398288	0.533539	-0.218758	-0.218758	-0.155879	-0.452996	-0.452996	-0.342366	0.513473	-0.620071	-0.620071	-0.627179	0.556881
Glucose-1	-0.22216	-0.293452	-0.304416	0.151405	-0.0688074	0.0212495	0.00497165	0.259021	-0.0254033	0.0301159	0.0301159	-0.361697	0.0207969	-0.0937411	-0.0937411	0.494976	-0.0710933	0.437984	0.0322392	-0.181501	-0.181501	0.199203	0.142206	0.253974	0.00566705	-0.152658	0.364701	-0.245542	-0.245542	0.573346	-0.363967	-0.363967	-0.033909	-0.033909	-0.15593	0.204575	0.630456	-0.265059	0.239648	0.239648	0.193831	0.224033	0.224033	0.245694	-0.487803	0.251504	0.251504	0.317598	-0.48486
Glucose-2	-0.0584446	0.00709866	0.00878225	-0.321847	0.105527	0.21428	0.221966	0.173796	-0.332165	-0.401822	-0.401822	0.092174	-0.0414933	-0.126698	-0.126698	-0.212328	0.048991	-0.163611	0.347731	0.0732821	0.0732821	-0.437435	-0.206527	-0.452595	0.396187	0.0149866	-0.422577	0.112272	0.112272	-0.215619	-0.132247	-0.132247	0.241236	0.241236	-0.235391	-0.206227	-0.264153	0.410686	-0.310509	-0.310509	-0.238724	-0.658035	-0.658035	-0.504213	0.724249	-0.798924	-0.798924	-0.6925	0.805404
Glucopyranose-2	-0.168645	-0.129711	-0.121361	-0.324052	0.0119682	0.0937188	0.099207	0.0893846	-0.244455	-0.395554	-0.395554	0.148262	-0.061182	0.151755	0.151755	-0.0758516	0.0311464	-0.186542	0.505635	0.00612073	0.00612073	-0.368591	-0.262059	-0.387775	0.438664	0.0375959	-0.397985	0.0624349	0.0624349	-0.118793	-0.0600592	-0.0600592	0.229692	0.229692	-0.178757	-0.242351	-0.318536	0.363963	-0.273936	-0.273936	-0.293815	-0.608981	-0.608981	-0.452217	0.640472	-0.746087	-0.746087	-0.655765	0.738001
Glucopyranose	-0.0685426	0.0245767	0.0267191	-0.313253	0.114336	0.222718	0.229993	0.162317	-0.346626	-0.400965	-0.400965	0.0656361	-0.0668636	-0.165343	-0.165343	-0.213746	0.0248562	-0.149961	0.324839	0.0844032	0.0844032	-0.438934	-0.18616	-0.452274	0.411303	0.0225319	-0.414637	0.0900993	0.0900993	-0.209112	-0.111011	-0.111011	0.261777	0.261777	-0.236189	-0.223725	-0.258477	0.3876	-0.309466	-0.309466	-0.232992	-0.647628	-0.647628	-0.497494	0.707926	-0.778879	-0.778879	-0.673996	0.789766
Trehalose	-0.258101	-0.0609029	-0.0501463	-0.0844595	0.166651	0.25968	0.259435	0.0657713	0.125994	-0.0417698	-0.0417698	-0.142428	0.0754236	0.183804	0.183804	-0.0488482	0.0926129	-0.126873	0.313172	0.213749	0.213749	-0.134045	-0.002092	-0.148796	0.27358	0.0720867	-0.211618	-0.298236	-0.298236	-0.095376	-0.186026	-0.186026	0.021983	0.021983	-0.102069	-0.0824872	-0.219823	0.0501326	-0.196046	-0.196046	-0.0402633	-0.393644	-0.393644	-0.244158	0.331666	-0.292302	-0.292302	-0.426327	0.419784
Cellobiose (isomer 1)	-0.019335	0.154075	0.11328	0.140759	0.019671	0.0146435	0.00700994	0.113506	0.184622	0.18438	0.18438	-0.327848	0.0468886	0.0390423	0.0390423	-0.0970246	-0.0270151	0.0167109	-0.119496	0.384601	0.384601	-0.280571	-0.039395	-0.274274	-0.384411	-0.290524	0.261353	-0.303775	-0.303775	-0.188369	-0.14893	-0.14893	-0.13763	-0.13763	0.115493	-0.178767	-0.145994	-0.28554	-0.0426925	-0.0426925	-0.111169	0.135384	0.135384	0.295966	-0.0755391	0.257211	0.257211	0.177419	-0.0784022
Cellobiose (isomer 2)	0.024443	0.162695	0.122306	0.195537	0.100212	0.0986984	0.0940387	0.0629035	0.342836	0.292276	0.292276	-0.308507	0.145837	0.114872	0.114872	-0.107883	0.0633488	-0.0134916	-0.230795	0.405684	0.405684	-0.164594	0.00739494	-0.163968	-0.439381	-0.285364	0.293417	-0.27329	-0.27329	-0.215886	-0.175688	-0.175688	-0.164533	-0.164533	0.144138	-0.100607	-0.130045	-0.255636	-0.0219417	-0.0219417	-0.0422858	0.197974	0.197974	0.339915	-0.138923	0.356747	0.356747	0.25125	-0.157405
Filter	exclude	exclude	exclude	exclude	exclude	exclude	exclude	exclude	exclude	include	include	exclude	exclude	exclude	exclude	exclude	exclude	include	include	include	include	include	include	include	include	include	include	include	include	include	include	include	include	include	include	include	include	include	include	include	include	include	include	include	include	include	include	include	include
	0.383345
[truncated: 1 more columns]

## Sheet: CorrelationMatrix3
## Microbiome-metabolome Spearman correlation matrix: the microbiome is classified at the genus level and metabolites are grouped by classes
## A filter is set at a threshold of Spearman correlation of ± 0.5
## Some correlation coefficients listed in the manuscript are highlighted
	Adlercreutzia	Collinsella	Coriobacteriaceae_UCG-002	Enterorhabdus	Senegalimassilia	Coriobacteriaceae_g_unclassified	Actinobacteria_class12_o_f_g_unclassified	Bacteroides	Bacteroidales_S24-7_group_g_unclassified	Butyricimonas	Parabacteroides	Alloprevotella	Prevotella_2	Prevotella_9	Prevotellaceae_Ga6A1_group	Prevotellaceae_NK3B31_group	Prevotellaceae_UCG-001	Prevotellaceae_UCG-003	Prevotellaceae_g_unclassified	p-2534-18B5_gut_group_g_unclassified	Bacteroidales_f_g_unclassified	Bacteroidia_o_f_g_unclassified	Bacteroidetes_c_o_f_g_unclassified	Gastranaerophilales_f_g_unclassified	Lactobacillus	Lactobacillaceae_g_unclassified	Streptococcus	Lactobacillales_f_g_unclassified	Bacilli_o_f_g_unclassified	Anaerovorax	Family_XIII_AD3011_group	Family_XIII_UCG-001	Family_XIII_g_unclassified	Lachnospiraceae_NK4A136_group	Lachnospiraceae_UCG-001	Lachnospiraceae_g_unclassified	Romboutsia	Peptostreptococcaceae_g_unclassified	Anaerotruncus	Ruminiclostridium_5	Ruminiclostridium_9	Ruminococcaceae_UCG-005	Ruminococcaceae_UCG-013	Ruminococcaceae_UCG-014	Ruminococcus_1	[Eubacterium]_coprostanoligenes_group	Ruminococcaceae_g_unclassified	Clostridiales_f_g_unclassified	Clostridia_o_f_g_unclassified
Acids	0.0840961	-0.00261097	-0.00342924	-0.189565	-0.0672495	-0.0104348	-0.156522	0.0930435	-0.346087	-0.429195	-0.000869565	-0.053913	0.218376	-0.0713043	0.240327	0.093913	-0.243478	-0.0791304	0.013913	0.370358	-0.169565	-0.00695652	-0.28	-0.208736	0.107826	0.287472	0.173043	0.156522	0.0278261	0.165217	0.0978474	0.14087	0.249565	-0.111304	-0.365538	-0.00347826	0.42	0.221739	-0.130435	0.132638	-0.177622	0.120941	0.413073	0.204392	0.296297	0.0465319	0.0434783	0.422609	0.0130435
Alcohols	0.189107	0.194952	0.180035	0.532174	-0.232317	0.285217	0.24087	-0.30087	0.729565	0.238345	-0.305217	0.123478	0.257404	0.335652	-0.518543	-0.110435	0.341739	0.0921739	-0.0530435	-0.190323	0.573913	-0.408696	0.115652	-0.15808	0.525217	-0.00797304	0.04	0.472174	0.452174	-0.497391	-0.157426	0.223478	-0.626087	0.0626087	0.513598	0.0191304	-0.342609	-0.457391	-0.290435	-0.283105	0.0345498	-0.426902	-0.561657	-0.668841	-0.281918	-0.427484	-0.410435	-0.641739	-0.276522
Aliphatic hydrocarbons	-0.0958608	-0.0800697	-0.425798	-0.197391	0.331881	-0.261739	-0.161739	0.374783	-0.433913	-0.108061	0.221739	0.0295652	-0.0213729	-0.282609	0.516378	0.312174	-0.157391	-0.0217391	0.226087	0.118309	-0.150435	0.45913	0.255652	0.328387	-0.393913	-0.30519	0.0634783	-0.375652	-0.378261	0.507826	0.19526	-0.23913	0.636522	0.178261	-0.396121	0.0713043	0.271304	0.353043	0.153043	0.233964	0.0646702	0.379067	0.33377	0.556643	0.124619	0.194825	0.404348	0.390435	0.334783
Amino acids	0.26536	0.179286	-0.0108593	0.573913	-0.15022	0.342609	0.313913	-0.163478	0.641739	0.198693	-0.197391	0.0608696	0.322453	0.265217	-0.488231	-0.125217	0.332174	-0.0591304	-0.0956522	-0.130311	0.532174	-0.23913	0.158261	-0.0829702	0.427826	-0.104092	0.0269565	0.349565	0.395652	-0.411304	-0.0852359	0.286957	-0.457391	0.0182609	0.436898	0.0434783	-0.306087	-0.408696	-0.331304	-0.19526	0.0677708	-0.305059	-0.528542	-0.503153	-0.295426	-0.395303	-0.413043	-0.526087	-0.262609
Amino Sugars	-0.0549021	0.0557006	0.293772	0.526087	-0.337994	0.285217	0.18	-0.318261	0.782609	0.295426	-0.384348	0.166087	0.411197	0.409565	-0.451425	-0.16087	0.371304	0.0504348	-0.221739	-0.188608	0.526957	-0.437391	-0.108696	-0.0576425	0.546957	0.0881463	-0.013913	0.448696	0.388696	-0.649565	-0.39052	0.462609	-0.723478	0.0443478	0.533016	0.116522	-0.377391	-0.48	-0.0608696	-0.340074	-0.057583	-0.426451	-0.414816	-0.764949	-0.0244009	-0.414873	-0.142609	-0.582609	-0.269565
Aromatic hydrocarbons	0.138998	0.21671	-0.129168	0.205217	0.4559	0.135652	0.270435	-0.0208696	-0.0156522	0.0614381	0.145217	-0.271304	-0.260192	-0.223478	-0.072531	-0.12	-0.0234783	-0.237391	-0.0721739	-0.130311	-0.106087	0.0478261	0.283478	0.206116	-0.201739	-0.495657	0.0226087	-0.24087	-0.0747826	0.293043	0.217439	-0.293913	0.18	0.0321739	-0.0344664	-0.0252174	-0.0930435	0.121739	-0.0330435	0.19352	0.177622	0.105146	-0.0666668	0.24875	-0.309369	-0.0817569	-0.13913	-0.0347826	0.185217
Fatty acids and fatty acid esters	-0.459696	-0.147955	-0.332065	-0.450435	0.306553	-0.332174	-0.366087	0.337391	-0.483478	0.0893248	0.422609	0.0113043	-0.0408874	-0.187826	0.115833	0.226957	-0.0704348	-0.0417391	0.411304	-0.210898	-0.423478	0.198261	0.26087	0.211356	-0.676522	-0.344612	0.189565	-0.613913	-0.778261	0.508696	0.0987171	-0.284348	0.501739	0.156522	-0.075729	0.110435	0.243478	0.274783	0.326957	0.060013	0.348156	0.162006	0.0714599	0.377908	-0.180393	0.128289	0.323478	0.322609	0.12087
Nitrogenous compounds	0.0901963	0.00696258	0.196038	0.568696	-0.462013	0.297391	0.169565	-0.229565	0.8	0.223966	-0.32087	0.226087	0.358229	0.308696	-0.495809	-0.238261	0.422609	0.19913	-0.113043	-0.160031	0.582609	-0.469565	-0.124348	-0.143233	0.501739	0.319364	-0.0234783	0.510435	0.44	-0.686957	-0.440096	0.492174	-0.74087	0.02	0.697581	0.164348	-0.542609	-0.714783	-0.168696	-0.380518	-0.0597978	-0.523925	-0.552507	-0.773646	-0.0845318	-0.473581	-0.316522	-0.743478	-0.422609
Phenolic acids	-0.00958608	-0.0818103	-0.242333	-0.218261	-0.0602626	-0.285217	-0.343478	0.318261	-0.402609	-0.383443	0.227826	0.0121739	-0.00278777	-0.306087	0.347499	-0.0165217	-0.137391	0.177391	0.281739	0.239475	-0.0356522	0.265217	0.0330435	0.138866	-0.409565	0.0792874	-0.066087	-0.273913	-0.285217	0.255652	-0.0126114	-0.156522	0.376522	-0.167826	-0.0805835	-0.0704348	0.00869565	-0.026087	-0.0747826	0.0978474	-0.0447376	0.296485	0.15207	0.414003	0.194772	0.133942	0.00782609	0.134783	-0.000869565
Sterols	-0.244881	0.144474	0.166318	-0.378261	0.420091	0.0626087	0.086087	-0.112174	-0.26087	-0.315033	0.02	-0.18087	-0.154721	-0.448696	0.160218	-0.112174	-0.369565	-0.113043	-0.249565	-0.0731572	-0.333043	0.216522	0.18087	0.211356	-0.275652	-0.305633	-0.0547826	-0.34087	-0.238261	0.272174	0.0913242	-0.302609	0.306087	-0.194783	-0.380587	-0.146087	0.164348	0.426957	0.266957	0.199174	-0.209514	0.163811	0.566014	0.327462	0.216994	0.131333	0.368696	0.289565	0.358261
Sugar acids	0.17865	0.0748477	0.120595	0.486087	-0.37817	0.273913	0.209565	-0.392174	0.724348	0.165142	-0.513913	0.10087	0.312695	0.321739	-0.514213	-0.156522	0.214783	0.263478	-0.133043	-0.232045	0.573043	-0.475652	-0.154783	-0.196508	0.621739	0.314935	0.12087	0.633913	0.587826	-0.693913	-0.137421	0.355652	-0.706087	-0.053913	0.550006	-0.0608696	-0.394783	-0.61913	-0.415652	-0.301805	-0.134213	-0.458942	-0.518955	-0.694499	-0.149456	-0.437486	-0.517391	-0.687826	-0.465217
Sugar alcohols	0.687148	0.141863	-0.00114308	0.205217	-0.175548	0.136522	0.0591304	-0.0408696	-0.111304	-0.0836603	-0.135652	-0.114783	-0.0436751	0.0921739	-0.119081	-0.0826087	-0.00347826	-0.168696	0.00782609	0.224044	-0.0243478	0.0808696	-0.27913	-0.284719	0.332174	0.334867	-0.0486957	0.284348	0.426957	-0.0408696	-0.0100022	0.0304348	-0.0304348	-0.130435	-0.075729	-0.182609	0.101739	-0.0678261	-0.397391	0.031746	0.1413	0.0694957	-0.0997824	0.0487062	-0.387365	0.17743	-0.486957	0.0443478	-0.138261
Sugars	0.0697169	0.0330722	0.121167	0.49913	-0.570311	0.26	0.12087	-0.282609	0.813913	0.355556	-0.413043	0.21913	0.363805	0.326957	-0.321518	-0.352174	0.323478	0.161739	-0.253913	-0.145743	0.56	-0.367826	-0.256522	-0.0917039	0.543478	0.424343	-0.142609	0.494783	0.485217	-0.807826	-0.443575	0.612174	-0.773043	0.0382609	0.688358	0.21913	-0.516522	-0.64087	-0.00782609	-0.398347	-0.139528	-0.456235	-0.468411	-0.806697	-0.0553378	-0.267884	-0.137391	-0.649565	-0.302609
Filter	include	exclude	exclude	include	include	exclude	exclude	exclude	include	exclude	include	exclude	exclude	exclude	include	exclude	exclude	exclude	exclude	exclude	include	exclude	exclude	exclude	include	exclude	exclude	include	include	include	exclude	include	include	exclude	include	exclude	include	include	exclude	exclude	exclude	include	include	include	exclude	exclude	include	include	exclude
[truncated: 26 more columns]

## Sheet: CorrelationMatrix4
## Microbiome-metabolome Spearman correlation matrix: the microbiome is classified at the phylum/class level and metabolites are grouped by classes
## A filter is set at a threshold of Spearman correlation of ± 0.5
## Some correlation coefficients listed in the manuscript are highlighted
	Bacteroidetes	Bacteroidia	Firmicutes	Unclassified_Bacteria	Bacteroidetes_c_unclassified	Tenericutes	Mollicutes	Clostridia	Erysipelotrichia	Negativicutes	Bacilli	Firmicutes_c_unclassified	Actinobacteria	Coriobacteriia	Proteobacteria	Gammaproteobacteria	Actinobacteria_class12	Spirochaetae	Spirochaetes	Epsilonproteobacteria	Cyanobacteria	Melainabacteria	Proteobacteria_c_unclassified	Deltaproteobacteria	Actinobacteria_class	Verrucomicrobia	Verrucomicrobiae	Fusobacteria	Fusobacteriia	Betaproteobacteria	Filter
Acids	-0.308696	-0.314783	0.395652	0.247826	-0.28	0.13913	0.13913	0.26	0.189565	0.222609	0.147826	0.303478	-0.0113043	-0.0173913	-0.477391	-0.280496	-0.156522	-0.033394	-0.033394	-0.199839	-0.13987	-0.208736	-0.055462	-0.349299	-0.0264839	0.0736136	0.0519625	0.129848	0.129848	-0.257676	exclude
Alcohols	0.534783	0.596522	-0.184348	-0.735652	0.115652	-0.578261	-0.578261	-0.585217	-0.0391304	0.206957	0.458261	-0.156522	0.288696	0.308696	0.28087	0.035225	0.24087	-0.413364	-0.413364	0.112685	-0.144663	-0.15808	-0.1523	0.136245	0.418166	-0.281464	-0.25007	-0.254008	-0.254008	0.379067	include
Aliphatic hydrocarbons	-0.243478	-0.34	0.0495652	0.412174	0.255652	0.421739	0.421739	0.5	0.00173913	-0.0834783	-0.373913	-0.0947826	-0.271304	-0.269565	-0.207826	-0.216134	-0.161739	0.408851	0.408851	-0.143497	0.34292	0.328387	0.183112	0.127101	-0.35033	0.294454	0.345334	0.239792	0.239792	-0.0762647	include
Amino acids	0.452174	0.490435	-0.168696	-0.666957	0.158261	-0.434783	-0.434783	-0.456522	0.00347826	0.111304	0.350435	-0.245217	0.30087	0.326957	0.0982609	-0.130028	0.313913	-0.319951	-0.319951	0.112685	-0.0444445	-0.0829702	-0.169027	0.0649221	0.346613	-0.135319	-0.10609	-0.262539	-0.262539	0.198108	include
Amino Sugars	0.588696	0.651304	-0.191304	-0.729565	-0.108696	-0.608696	-0.608696	-0.524348	0.0243478	0.225217	0.450435	-0.207826	0.245217	0.261739	0.14087	-0.0291368	0.18	-0.552807	-0.552807	0.0360943	-0.0244009	-0.0576425	-0.207762	-0.179222	0.585897	-0.588909	-0.586744	-0.0767712	-0.0767712	0.420584	include
Aromatic hydrocarbons	-0.14	-0.132174	-0.113913	0.0626087	0.283478	0.221739	0.221739	0.11913	0.108696	-0.253913	-0.237391	-0.151304	0.150435	0.152174	0.42	0.286584	0.270435	0.225635	0.225635	-0.00352139	0.127669	0.206116	0.154941	0.52212	-0.126379	0.219758	0.257648	-0.277703	-0.277703	0.114623	include
Fatty acids and fatty acid esters	-0.357391	-0.376522	-0.188696	0.598261	0.26087	0.423478	0.423478	0.502609	-0.191304	-0.32087	-0.588696	-0.00434783	-0.423478	-0.406957	0.0530435	-0.0300065	-0.366087	0.286557	0.286557	-0.163745	0.173857	0.211356	0.250899	0.0365758	-0.583109	0.214345	0.231666	0.21894	0.21894	-0.0821313	include
Nitrogenous compounds	0.629565	0.734783	-0.19913	-0.765217	-0.124348	-0.733043	-0.733043	-0.673043	-0.0973913	0.285217	0.468696	-0.109565	0.254783	0.278261	0.0913043	-0.0169602	0.169565	-0.681419	-0.681419	0.174309	-0.0949893	-0.143233	-0.311643	-0.149047	0.504123	-0.535864	-0.542359	-0.336466	-0.336466	0.170129	include
Phenolic acids	-0.162609	-0.193913	0.0669565	0.290435	0.0330435	0.213043	0.213043	0.150435	-0.0426087	0.0469565	-0.314783	0.125217	-0.293043	-0.27913	-0.41913	-0.285279	-0.343478	-0.00992796	-0.00992796	0.0677868	0.174292	0.138866	-0.301079	-0.154533	-0.321523	0.265225	0.253317	-0.235053	-0.235053	-0.374555	exclude
Sterols	-0.330435	-0.384348	-0.0026087	0.436522	0.18087	0.431304	0.431304	0.287826	0.18	-0.224348	-0.318261	0.0478261	0.0608696	0.0417391	0.262609	0.343118	0.086087	0.341161	0.341161	-0.124129	0.143791	0.211356	0.195437	0.121615	0.0497153	-0.0790264	-0.0952647	0.145012	0.145012	-0.0180508	exclude
Sugar acids	0.52	0.609565	-0.0634783	-0.766087	-0.154783	-0.623478	-0.623478	-0.714783	0.0304348	0.30087	0.613913	-0.0382609	0.249565	0.252174	0.0026087	-0.0095673	0.209565	-0.531597	-0.531597	0.117086	-0.138127	-0.196508	-0.338934	-0.126187	0.447902	-0.480653	-0.479571	-0.232209	-0.232209	0.305059	include
Sugar alcohols	-0.113913	-0.0678261	0.301739	-0.183478	-0.27913	-0.0826087	-0.0826087	-0.161739	0.109565	0.254783	0.313913	0.0947826	0.154783	0.175652	-0.188696	-0.0347902	0.0591304	0.0365529	0.0365529	0.159343	-0.23573	-0.284719	-0.147899	-0.0493774	-0.0311301	0.585661	0.569423	-0.134587	-0.134587	-0.179154	include
Sugars	0.642609	0.741739	-0.0330435	-0.827826	-0.256522	-0.770435	-0.770435	-0.611304	-0.0686957	0.451304	0.458261	-0.013913	0.22	0.248696	0.00521739	-0.0469667	0.12087	-0.591165	-0.591165	0.291395	-0.0527234	-0.0917039	-0.273788	-0.284377	0.573817	-0.570505	-0.581331	-0.204723	-0.204723	0.0672393	include
Filter	include	include	exclude	include	exclude	include	include	include	exclude	exclude	include	exclude	exclude	exclude	exclude	exclude	exclude	include	include	exclude	exclude	exclude	exclude	include	include	include	include	exclude	exclude	exclude
